# Supplementary material
Source: PubMed Central journal article supplement (PMC8111572)
Supplement: NIHMS1696478-supplement-Supporting_Info.pdf [file NIHMS1696478-supplement-Supporting_Info.pdf]

# Supporting Information

## **Oxyaapa: A Picolinate-Based Ligand with Five Oxygen Donors that Strongly Chelates Lanthanides**

Aohan Hu,<sup>†</sup> Ivan Keresztes,<sup>†</sup> Samantha N. MacMillan,<sup>†</sup> Yang Yang,<sup>†</sup> Erdong Ding,<sup>†</sup> Warren R. Zipfel,<sup>‡</sup> Robert A. Distasio, Jr.,<sup>†</sup> John W. Babich,<sup>§</sup> and Justin J. Wilson<sup>\*,†</sup>

<sup>†</sup>Department of Chemistry and Chemical Biology, Cornell University, Ithaca, New York 14853, United States

<sup>‡</sup>Department of Biomedical Engineering, Cornell University, Ithaca, New York 14853, United States

<sup>§</sup>Department of Radiology, Weill Cornell Medicine, New York, New York 10065, United States

\*email: [jjw275@cornell.edu](mailto:jjw275@cornell.edu)

## Table of Contents

|                                                     |      |
|-----------------------------------------------------|------|
| 1. 1D NMR Spectra.....                              | S3   |
| 2. High-Resolution Mass Spectra .....               | S12  |
| 3. Analytical HPLC Chromatograms .....              | S17  |
| 4. Potentiometric Titrations .....                  | S20  |
| 5. UV–Vis Spectroscopic Titrations .....            | S28  |
| 6. DTPA Transchelation Studies.....                 | S34  |
| 7. X-Ray Crystallography .....                      | S39  |
| 8. 2D NMR Spectra for Complex Solution Studies..... | S41  |
| 9. Luminescence Lifetime Measurements .....         | S82  |
| 10. DFT Calculations .....                          | S83  |
| 11. $^{17}\text{O}$ NMR Measurements.....           | S159 |

# 1. 1D NMR Spectra

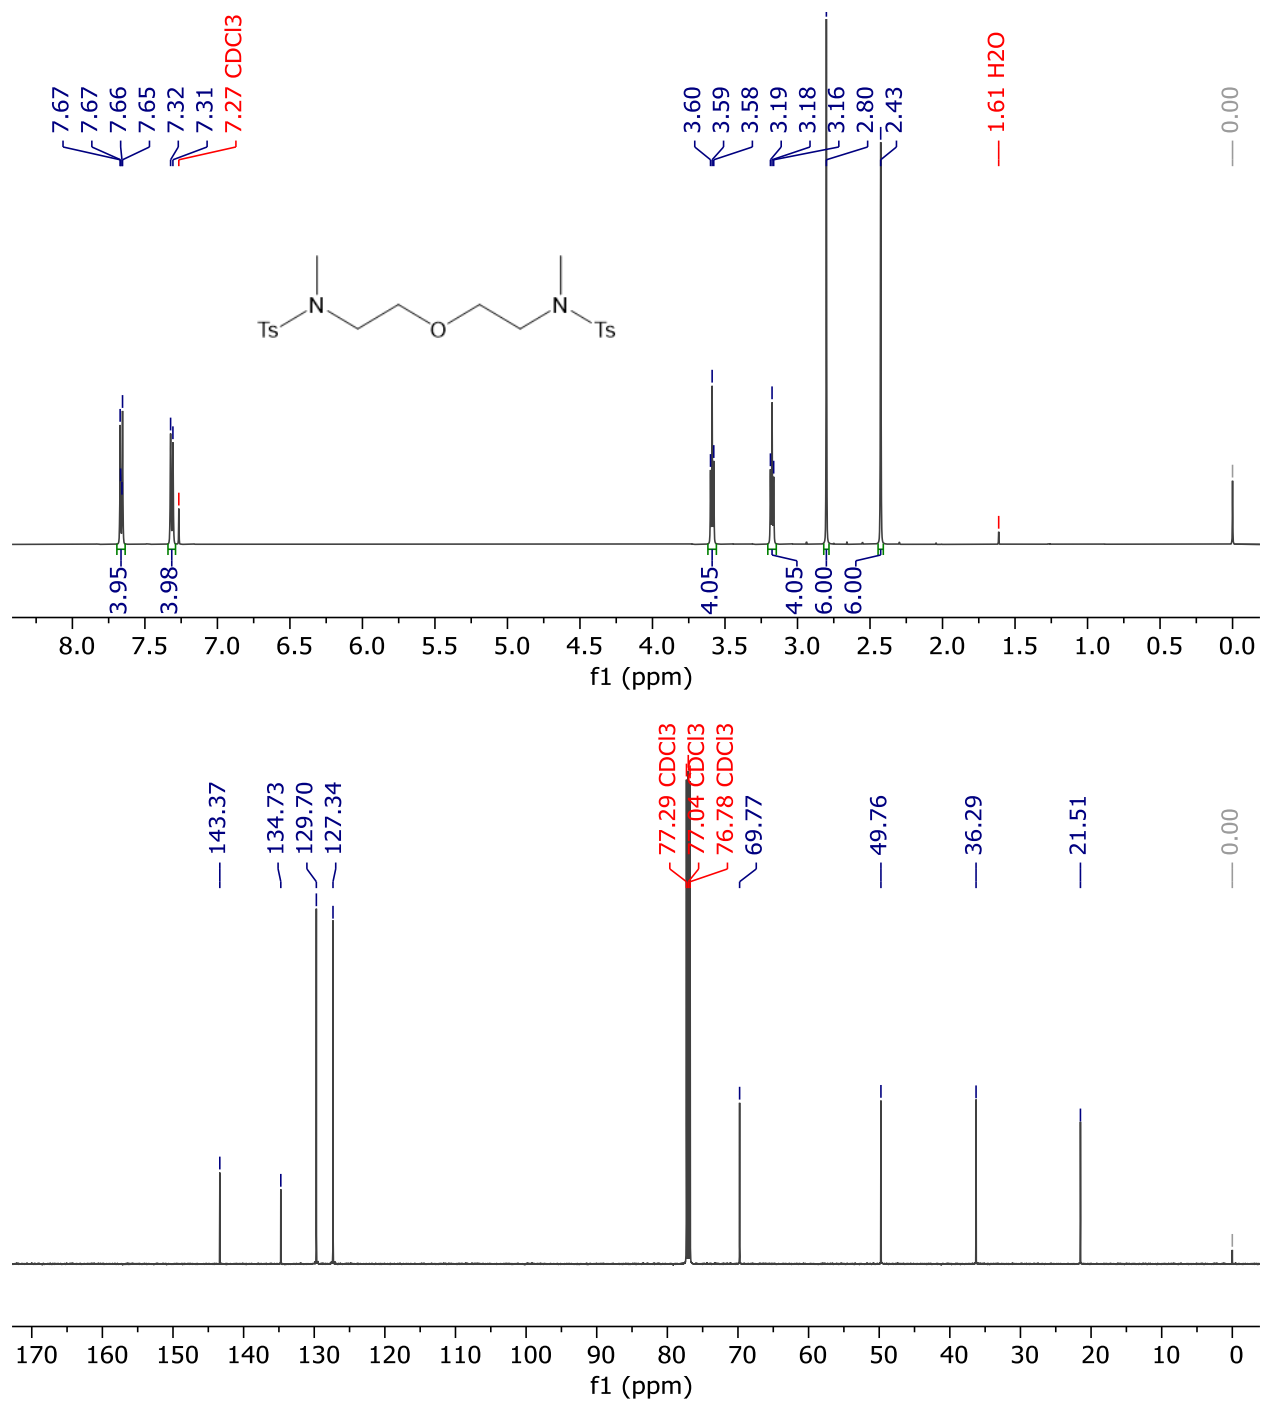

**Figure S1.**  $^1\text{H}$  NMR (500 MHz,  $\text{CDCl}_3$ , 25 °C) and  $^{13}\text{C}\{^1\text{H}\}$  NMR (126 MHz,  $\text{CDCl}_3$ , 25 °C) spectra of **2**.

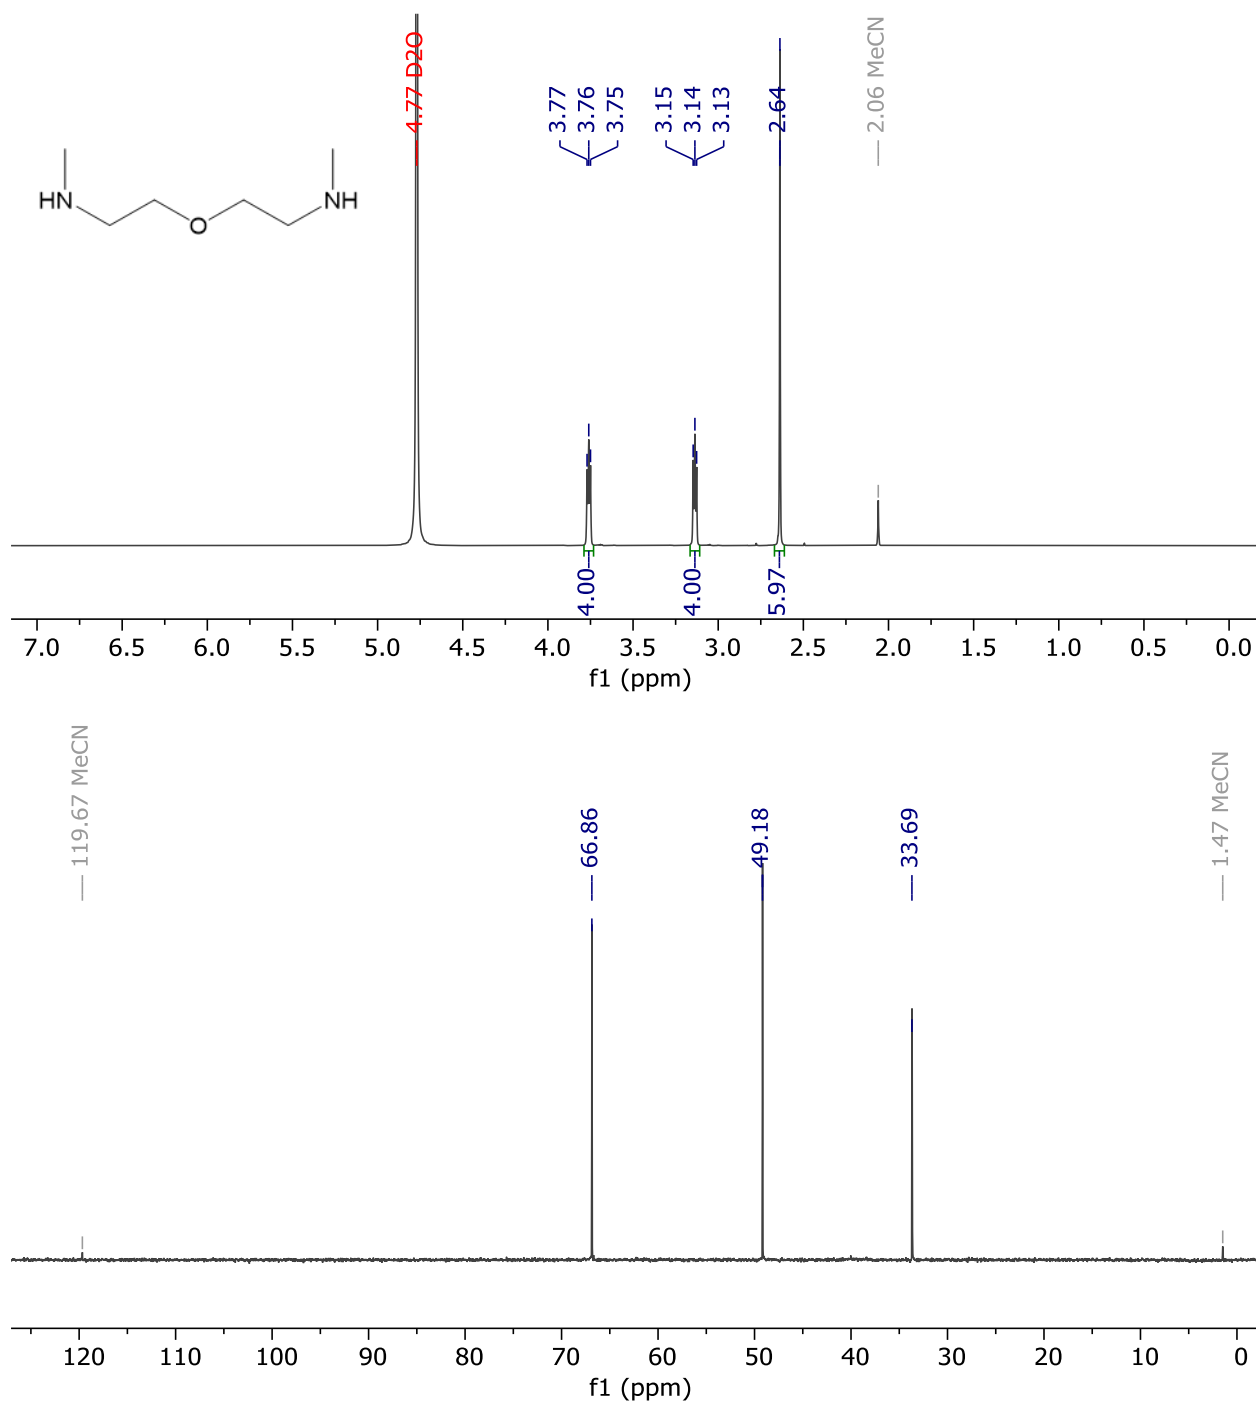

**Figure S2.** <sup>1</sup>H NMR (500 MHz, D<sub>2</sub>O, pD = 9–10 by NaOD, 25 °C) and <sup>13</sup>C{<sup>1</sup>H} NMR (126 MHz, D<sub>2</sub>O, pD = 9–10 by NaOD, 25 °C) spectra of **3**. Acetonitrile was added as an internal reference.

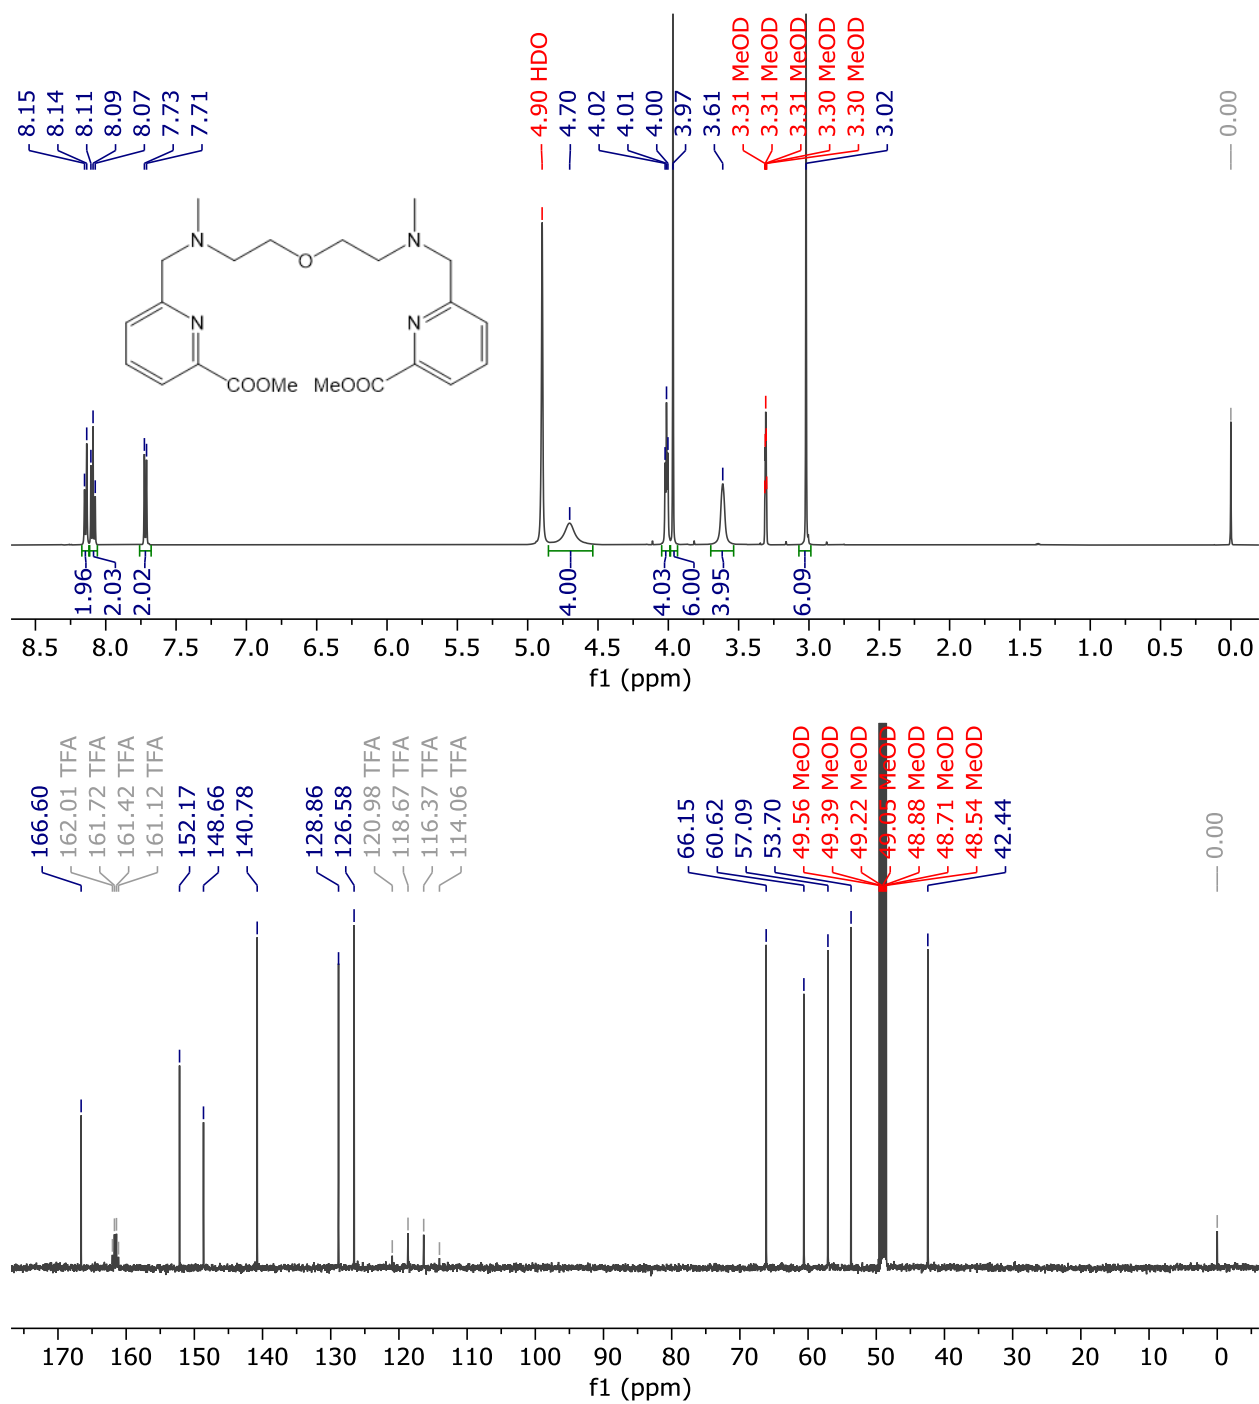

**Figure S3.** <sup>1</sup>H NMR (500 MHz, CD<sub>3</sub>OD, 25 °C) and <sup>13</sup>C{<sup>1</sup>H} NMR (126 MHz, CD<sub>3</sub>OD, 25 °C) spectra of **4**.

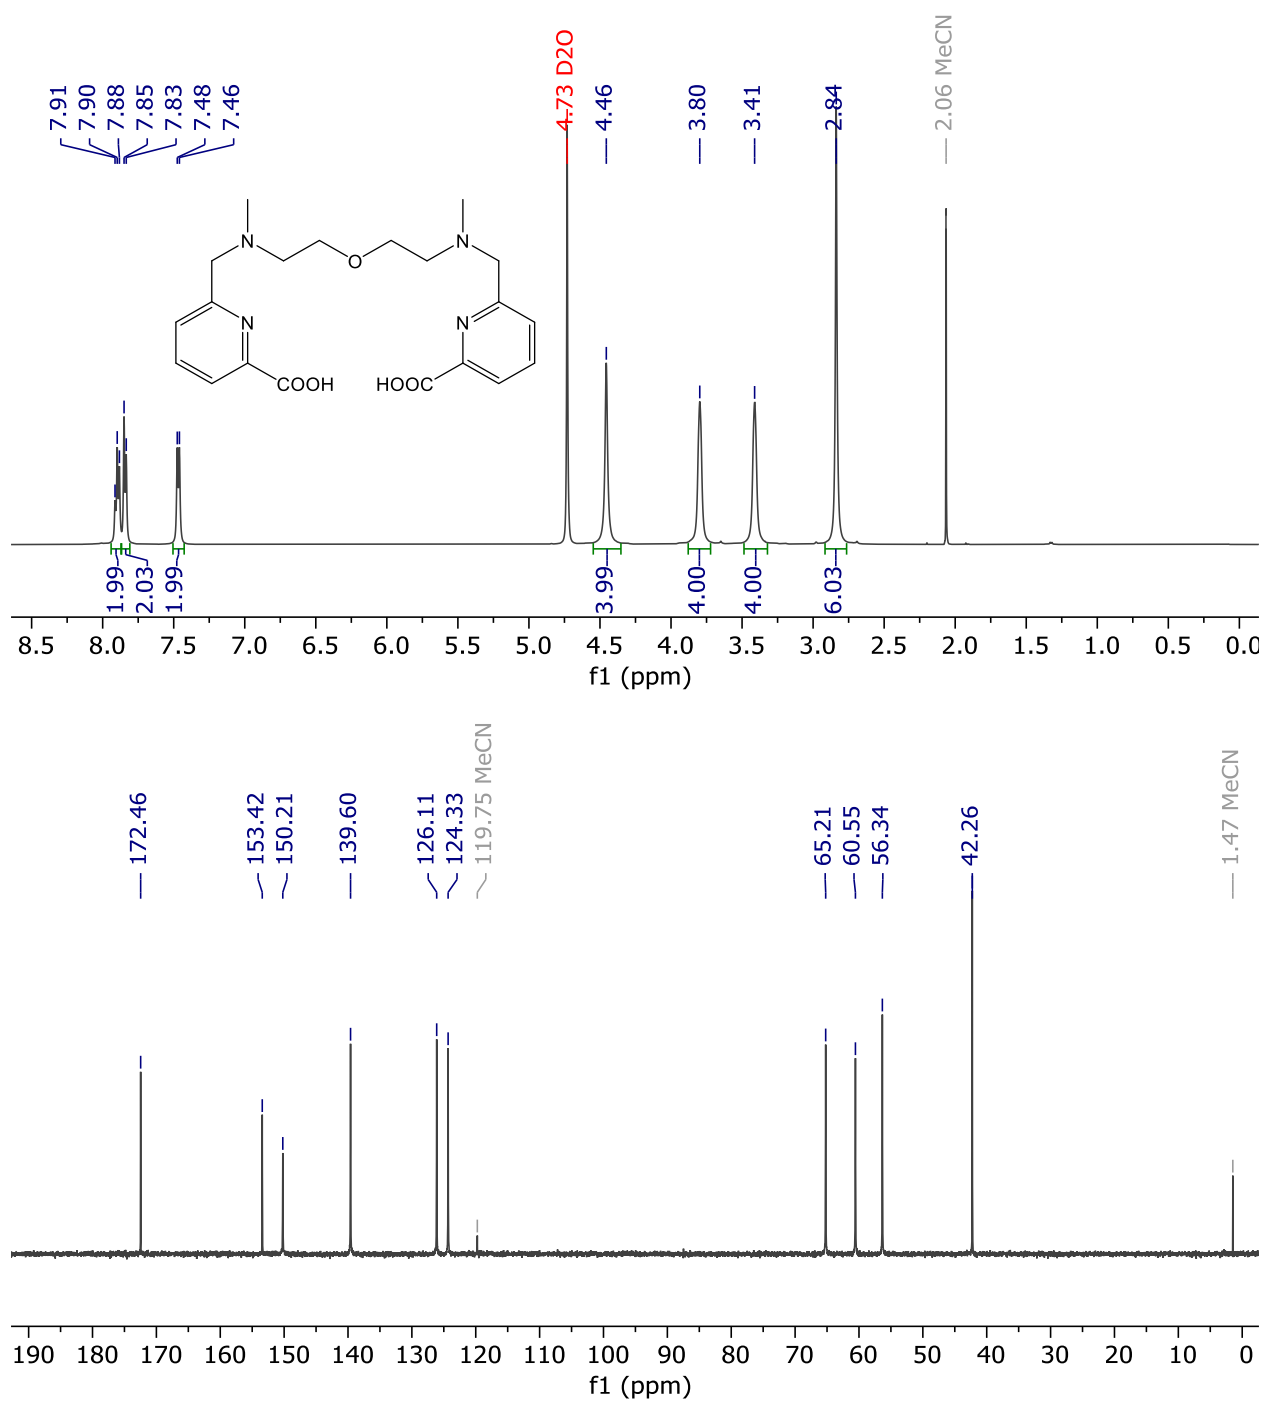

**Figure S4.** <sup>1</sup>H NMR (500 MHz, D<sub>2</sub>O, pD ≈ 8 by NaOD, 25 °C) and <sup>13</sup>C{<sup>1</sup>H} NMR (126 MHz, D<sub>2</sub>O, pD ≈ 8 by NaOD, 25 °C) spectra of **OxyMepa**. Acetonitrile was added as an internal reference.

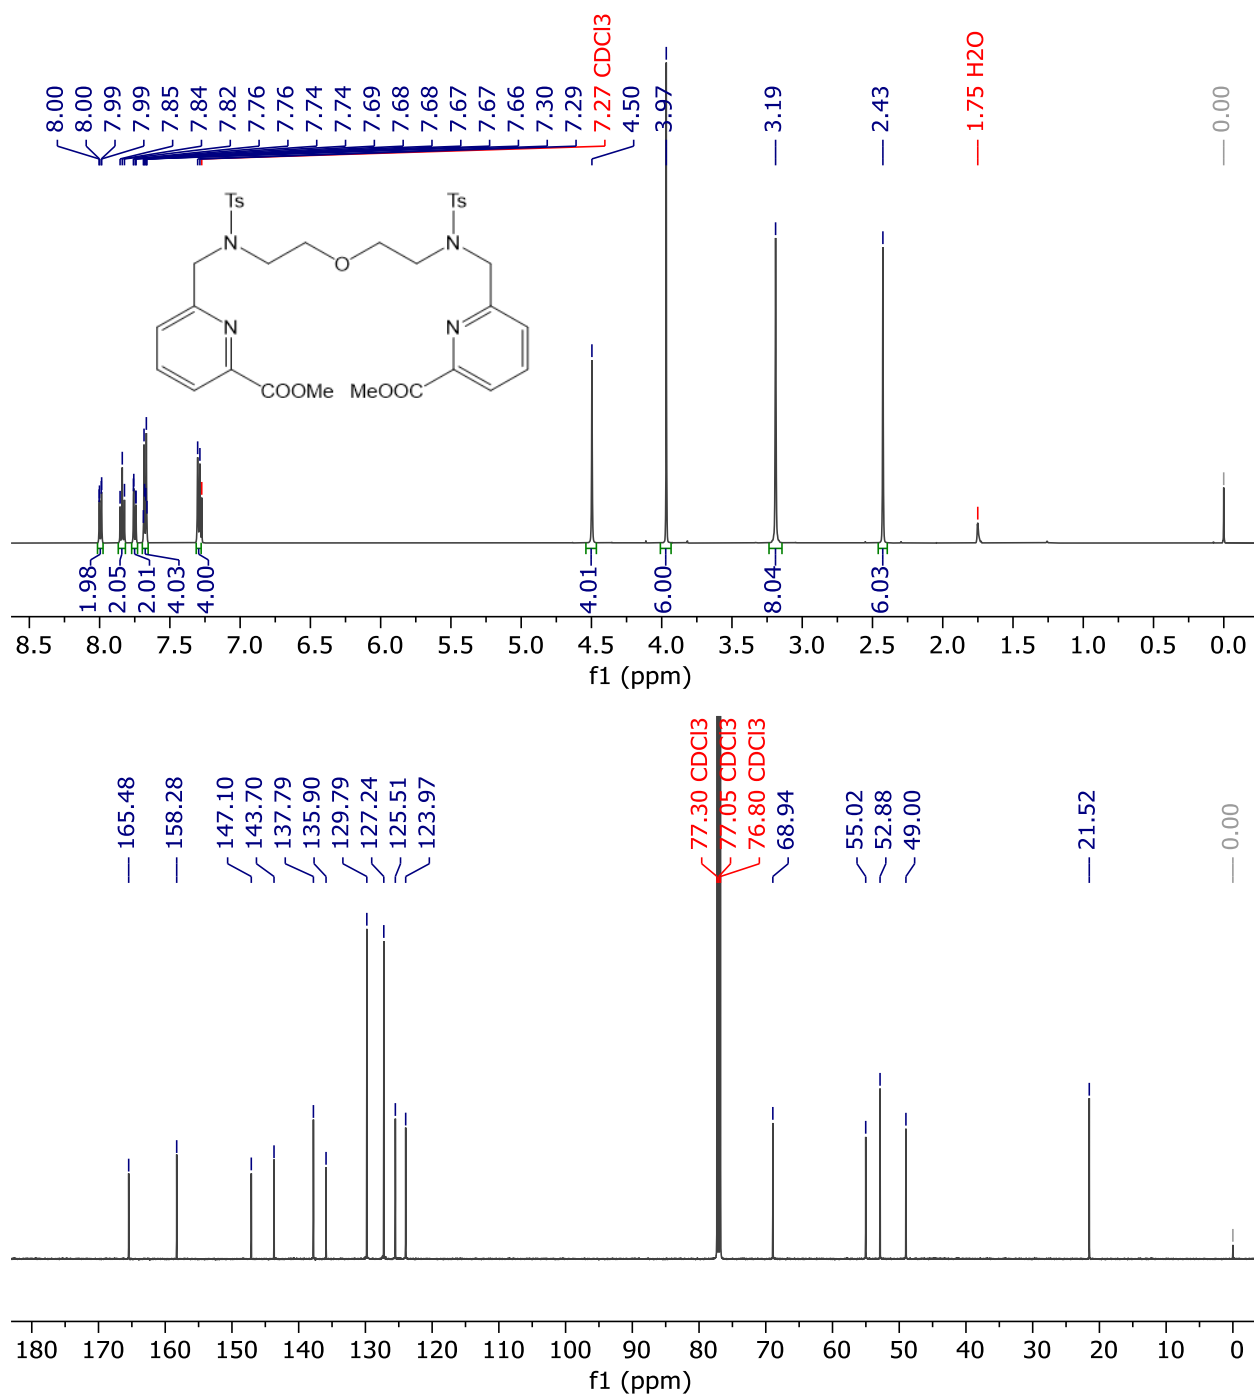

**Figure S5.** <sup>1</sup>H NMR (CDCl<sub>3</sub>, 500 MHz, 25 °C) and <sup>13</sup>C{<sup>1</sup>H} NMR (CDCl<sub>3</sub>, 126 MHz, 25 °C) spectra of **5**.

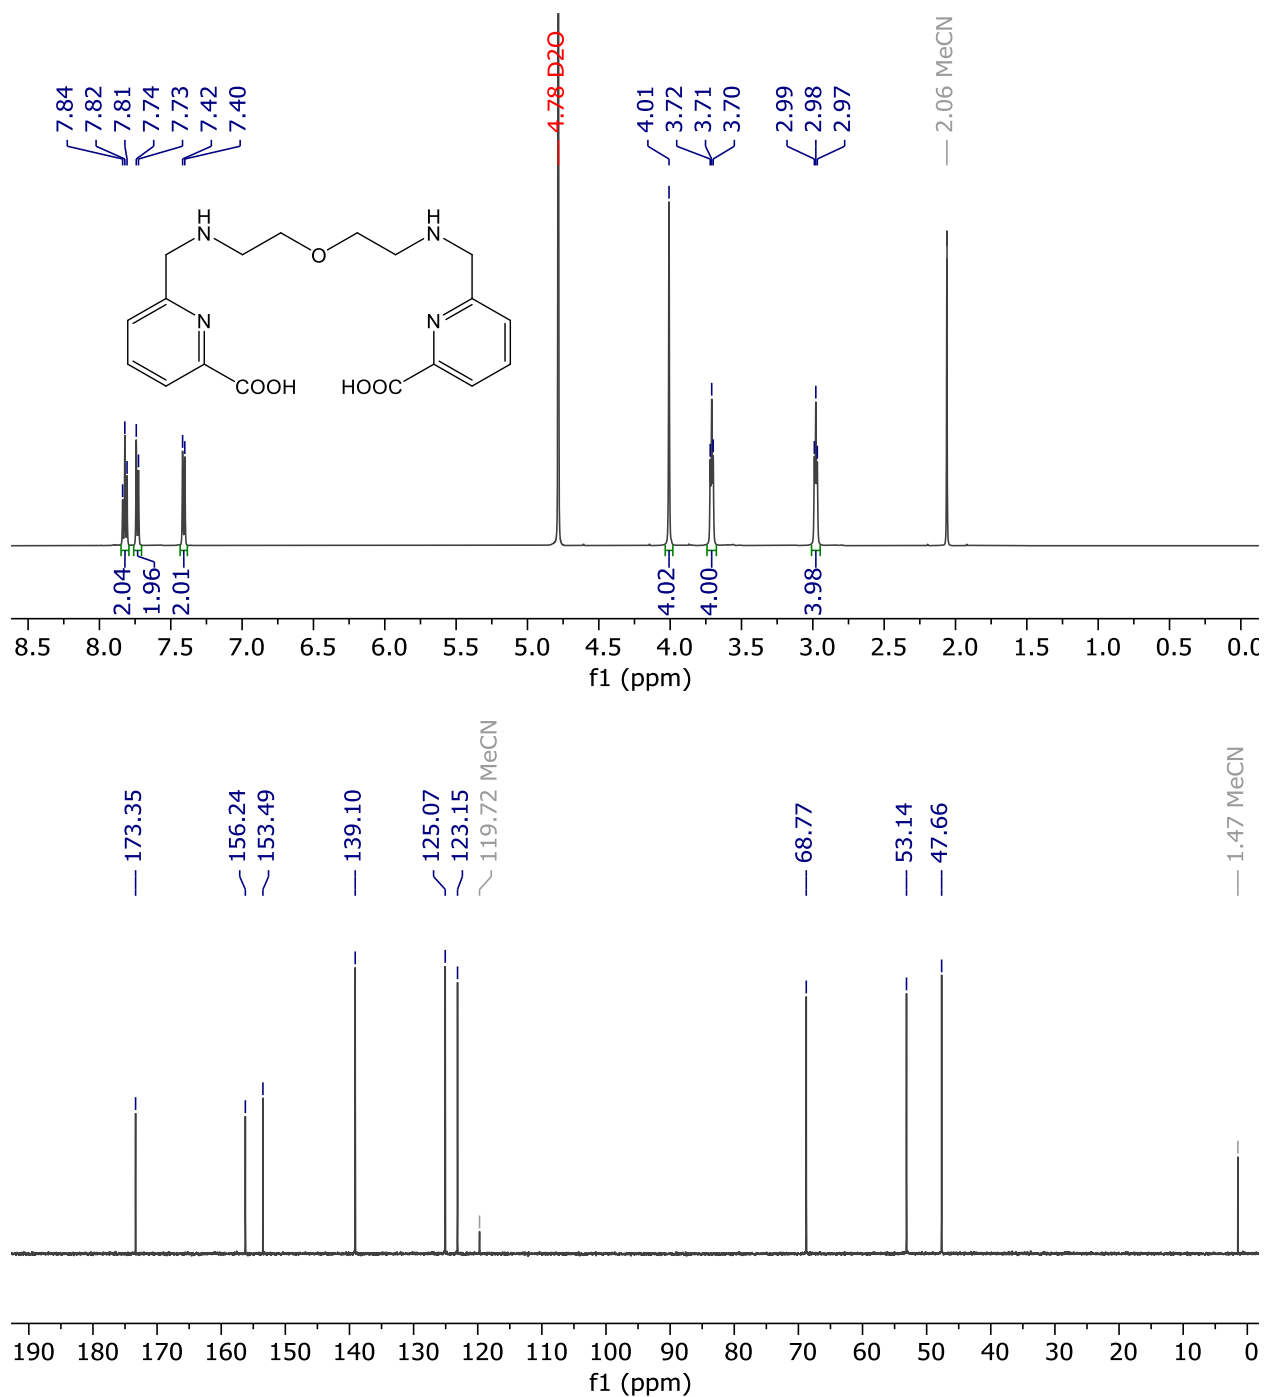

**Figure S6.**  $^1\text{H}$  NMR (500 MHz,  $\text{D}_2\text{O}$ ,  $\text{pD} \approx 9$  by NaOD, 25 °C) and  $^{13}\text{C}\{^1\text{H}\}$  NMR (126 MHz,  $\text{D}_2\text{O}$ ,  $\text{pD} \approx 9$  by NaOD, 25 °C) spectra of **6**. Acetonitrile was added as an internal reference.



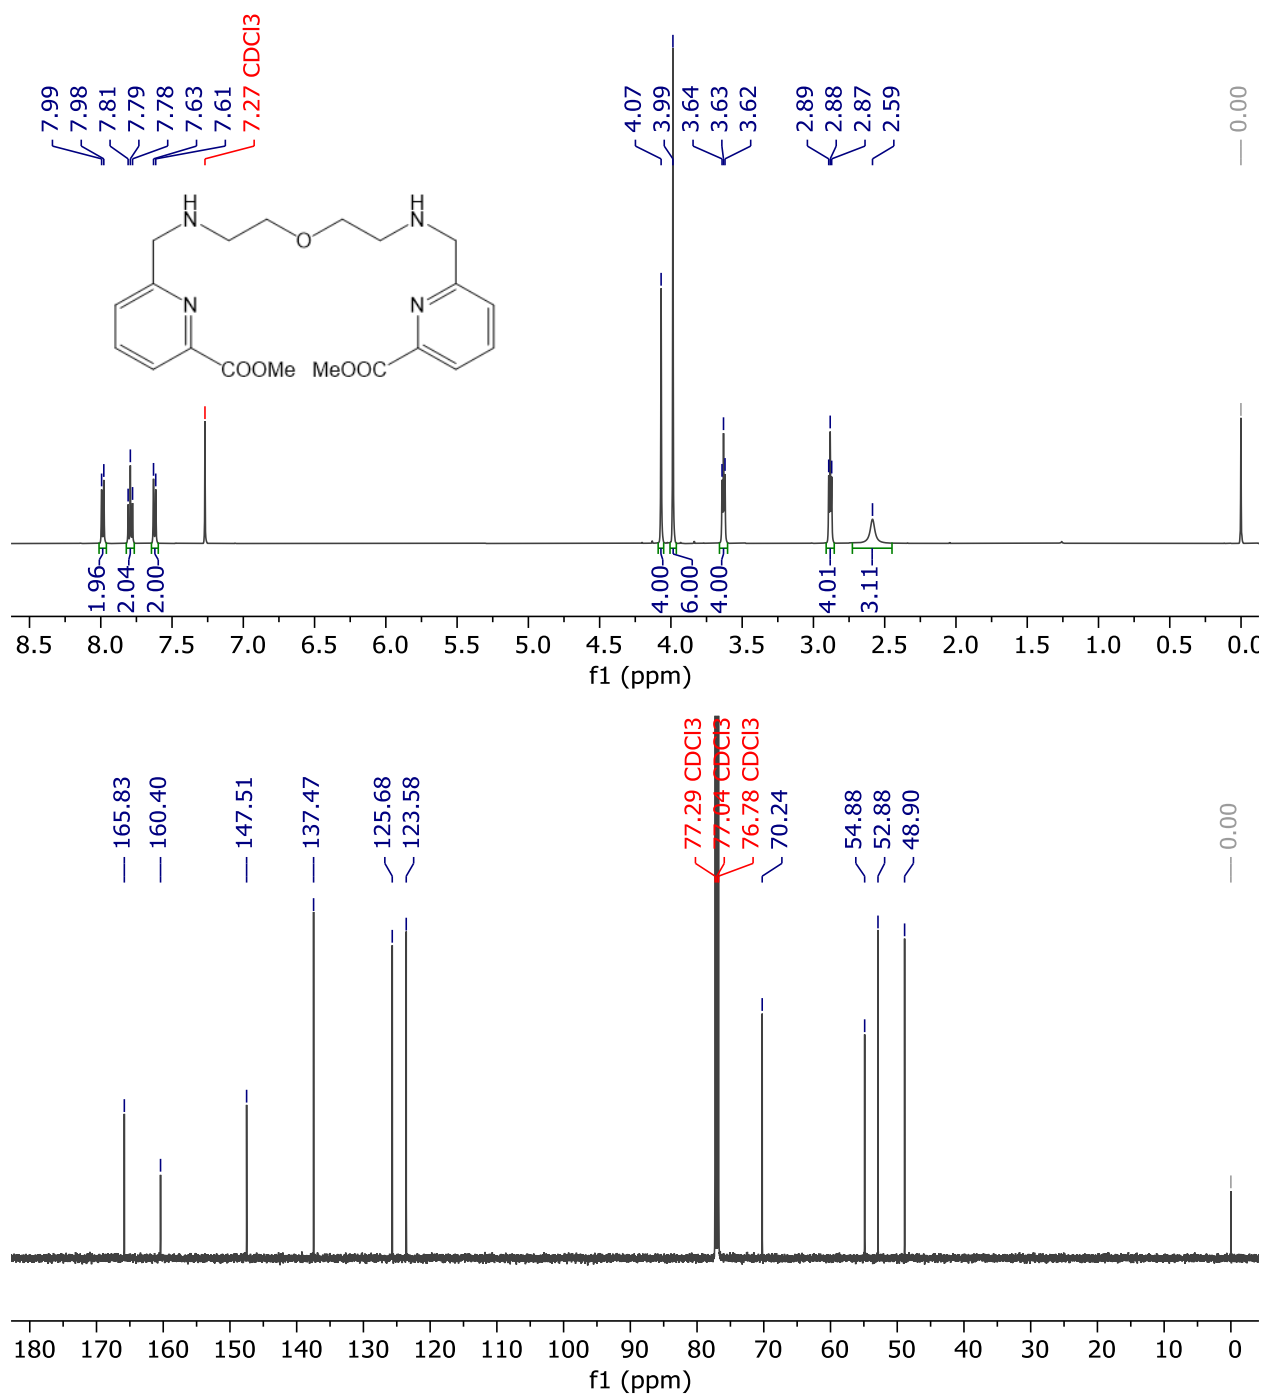

**Figure S7.** <sup>1</sup>H NMR (500 MHz, CDCl<sub>3</sub>, 25 °C) and <sup>13</sup>C{<sup>1</sup>H} NMR (126 MHz, CDCl<sub>3</sub>, 25 °C) spectra of **7**.

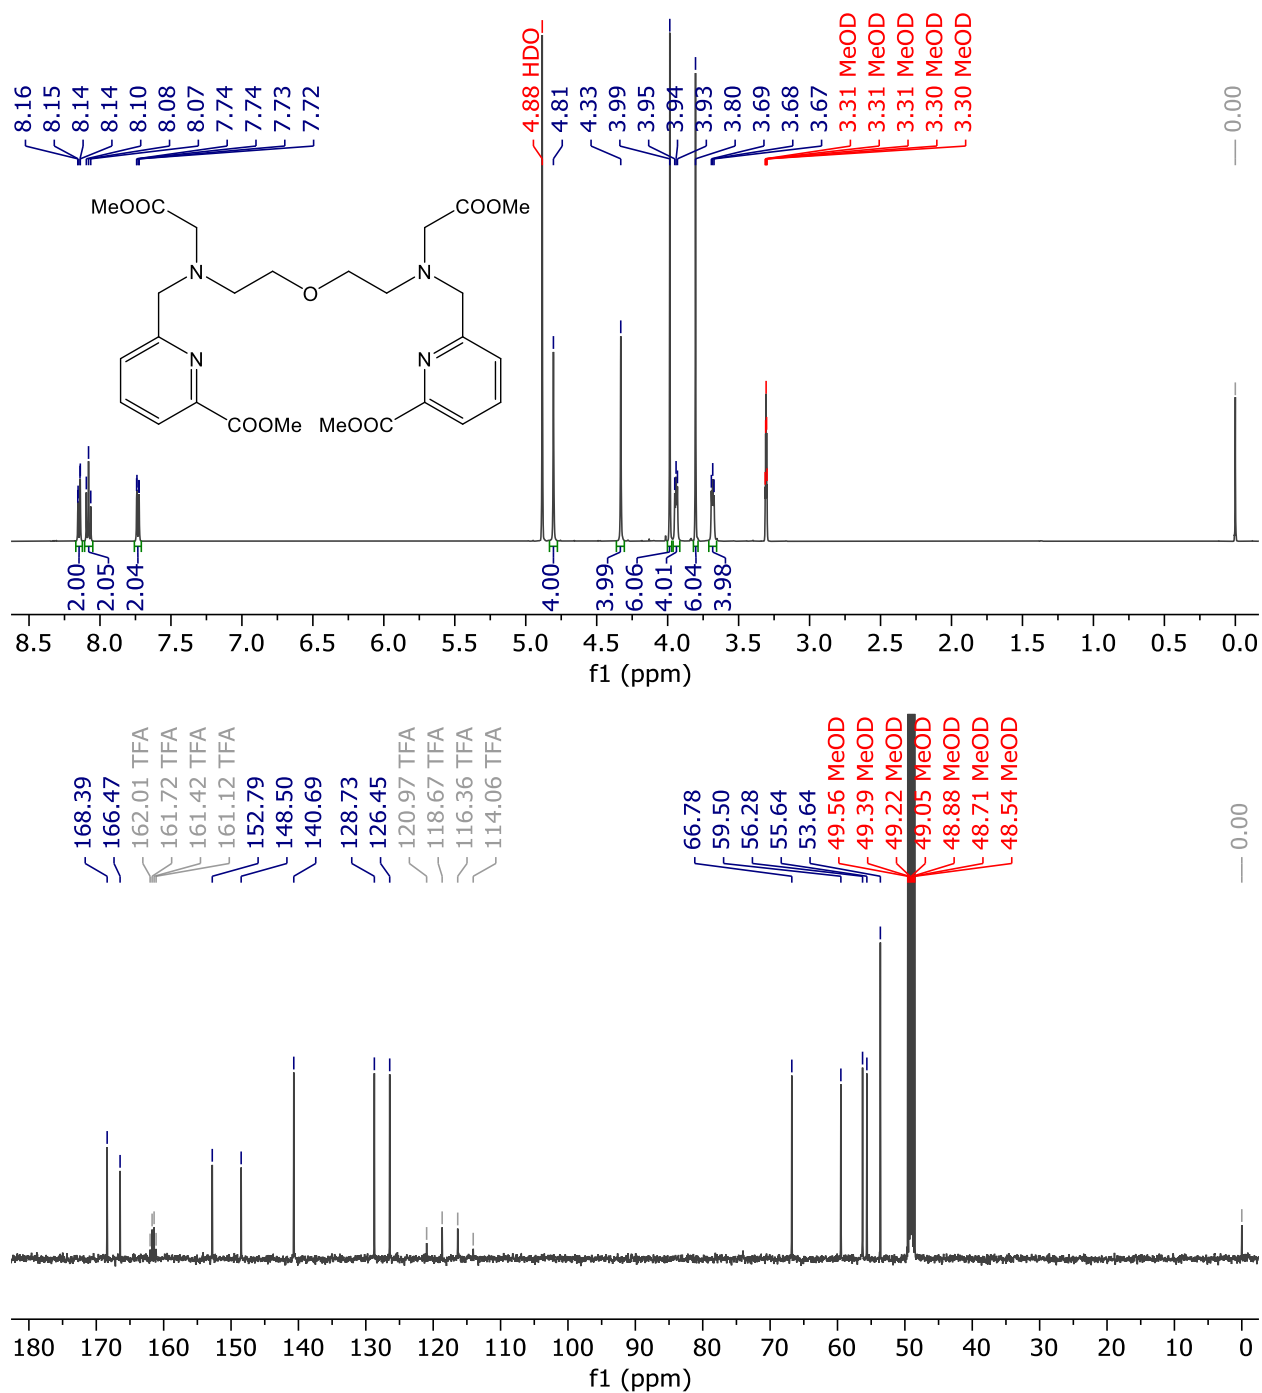

**Figure S8.** <sup>1</sup>H NMR (500 MHz, CD<sub>3</sub>OD, 25 °C) and <sup>13</sup>C{<sup>1</sup>H} NMR (126 MHz, CD<sub>3</sub>OD, 25 °C) spectra of **8**.

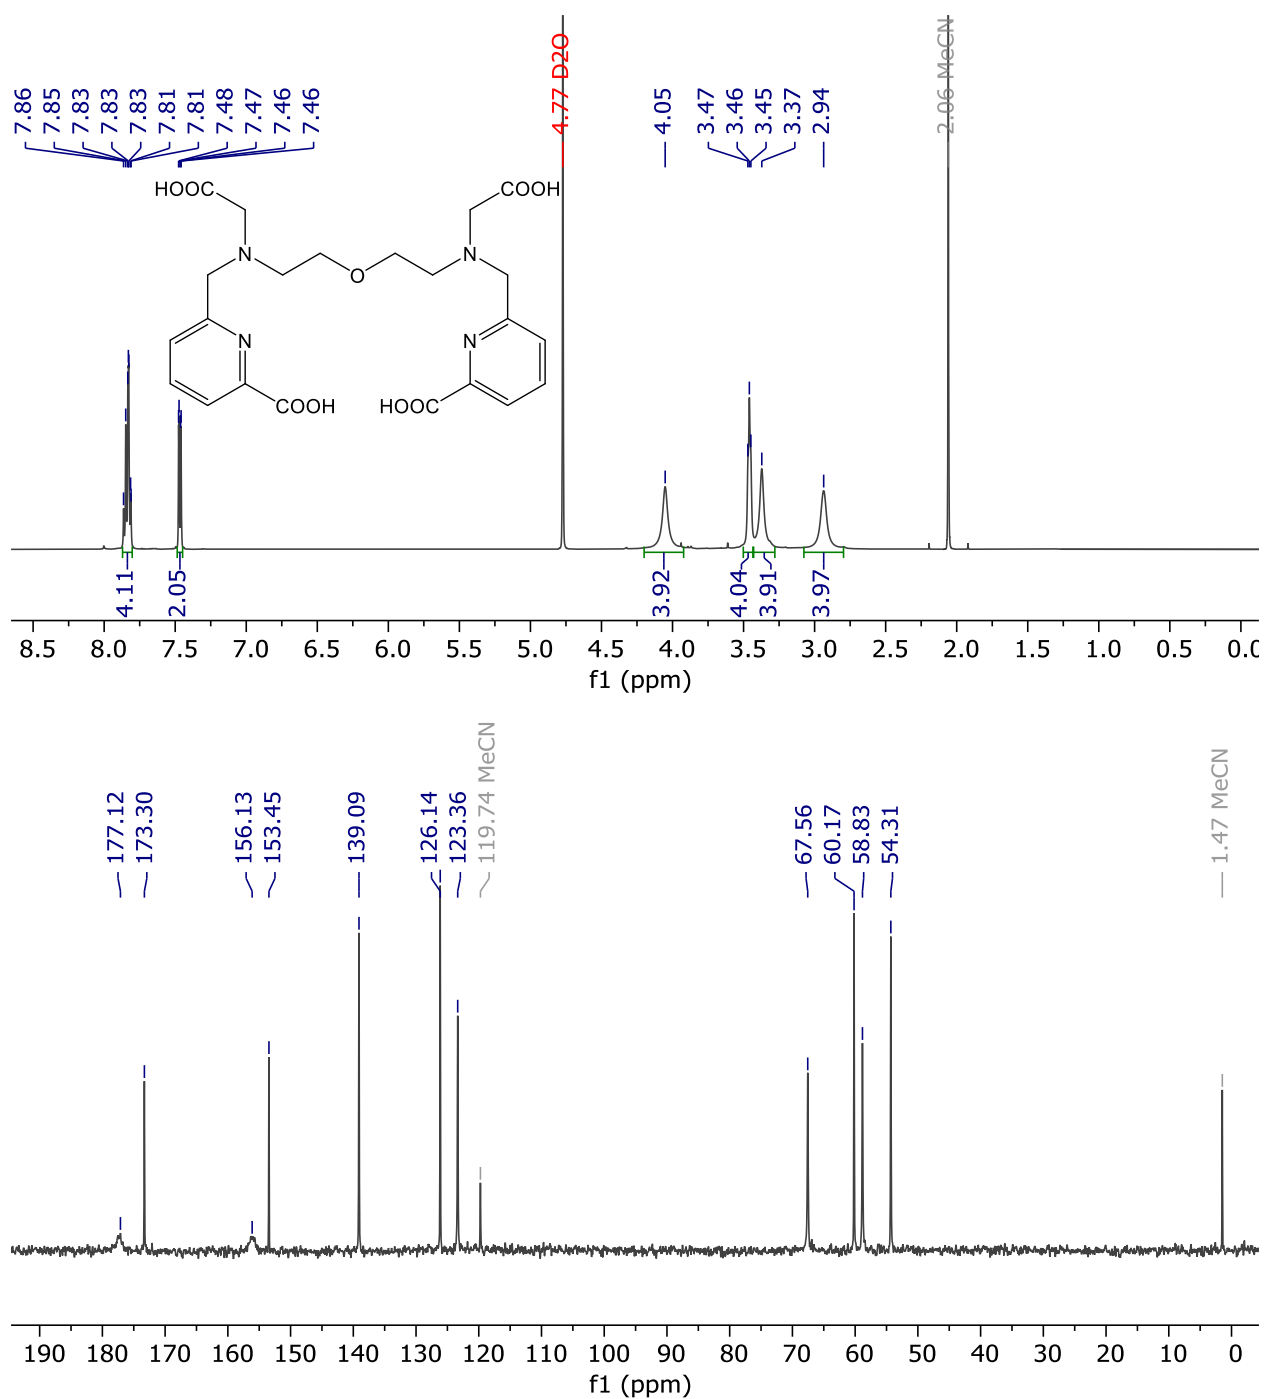

**Figure S9.**  $^1\text{H}$  NMR (500 MHz,  $\text{D}_2\text{O}$ ,  $\text{pD} \approx 9$  by NaOD,  $25^\circ\text{C}$ ) and  $^{13}\text{C}\{^1\text{H}\}$  NMR (126 MHz,  $\text{D}_2\text{O}$ ,  $\text{pD} \approx 9$  by NaOD,  $25^\circ\text{C}$ ) spectra of **Oxyaapa**. Acetonitrile was added as an internal reference.

## 2. High-Resolution Mass Spectra

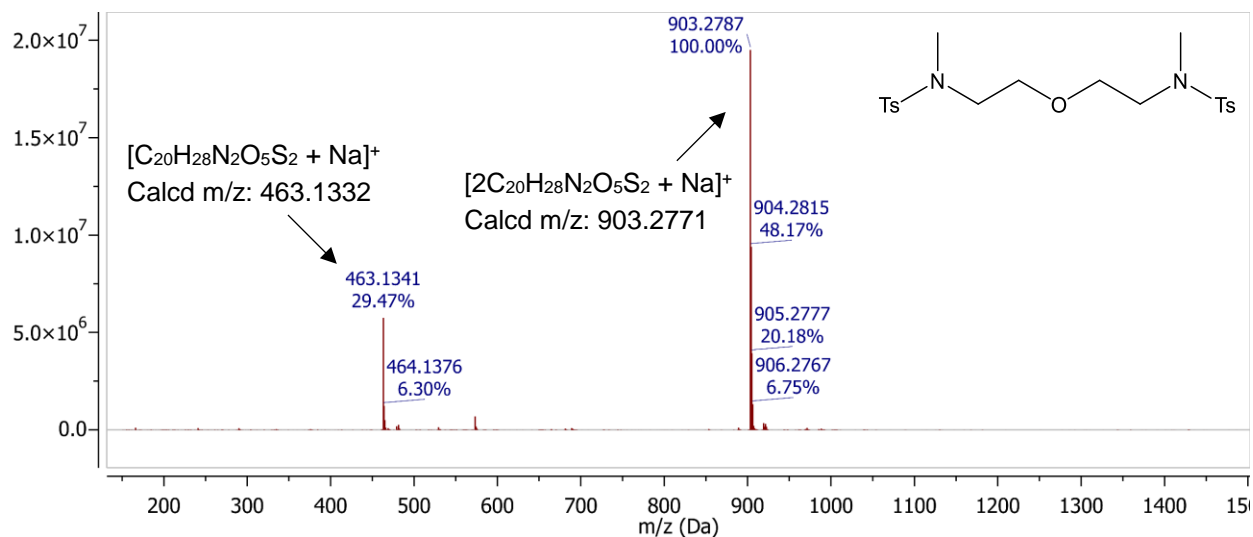

**Figure S10.** ESI-HRMS of **2**. MeCN was used as the mobile phase.

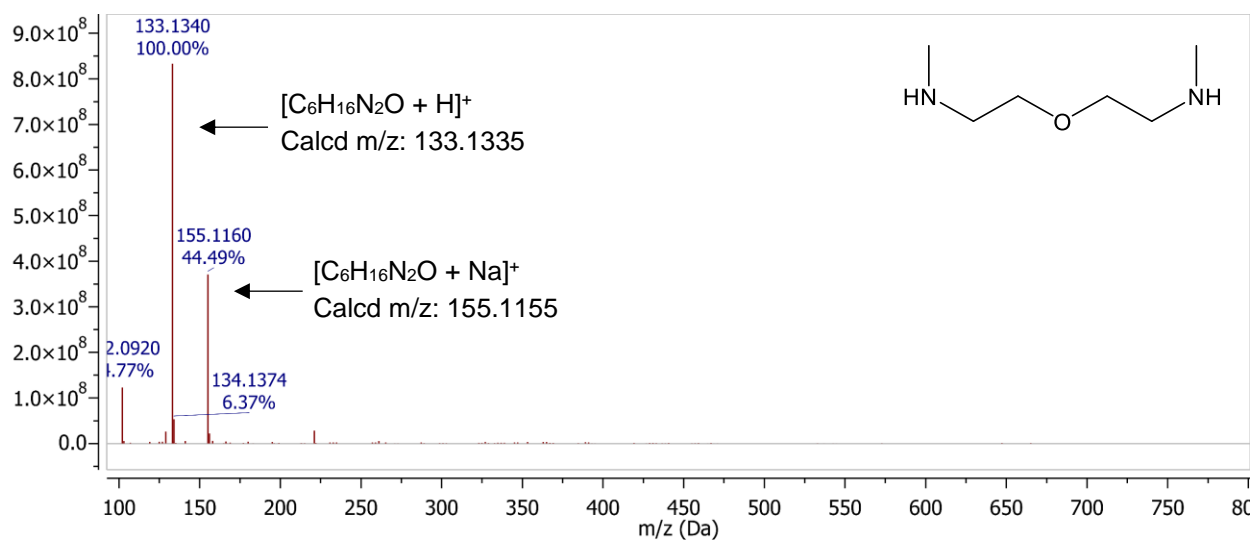

**Figure S11.** ESI-HRMS of **3**. MeCN was used as the mobile phase.

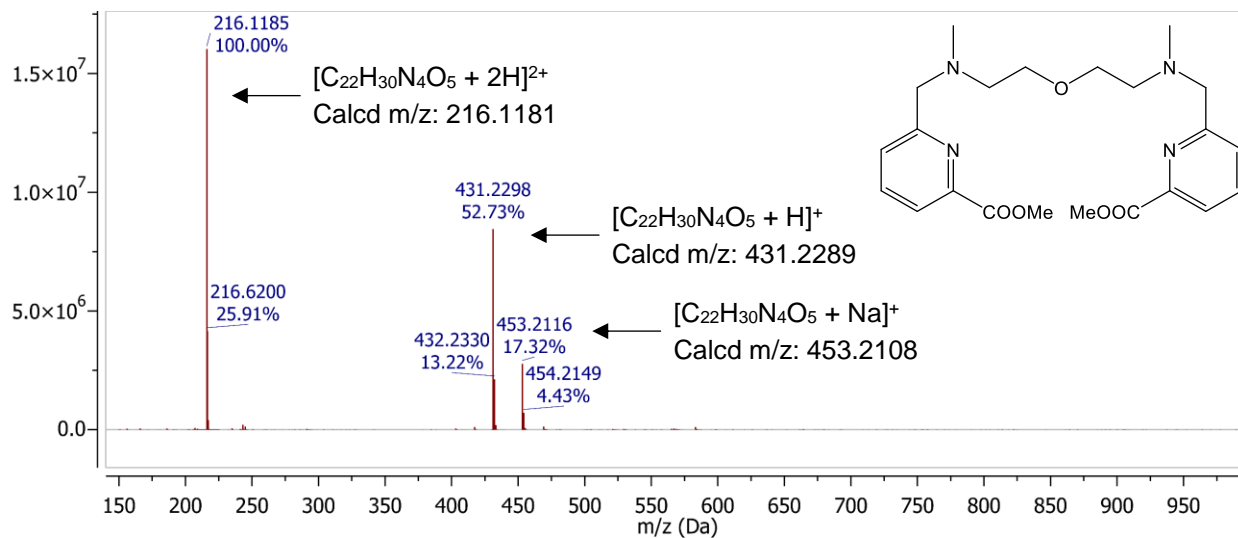

**Figure S12.** ESI-HRMS of **4**. MeCN was used as the mobile phase.

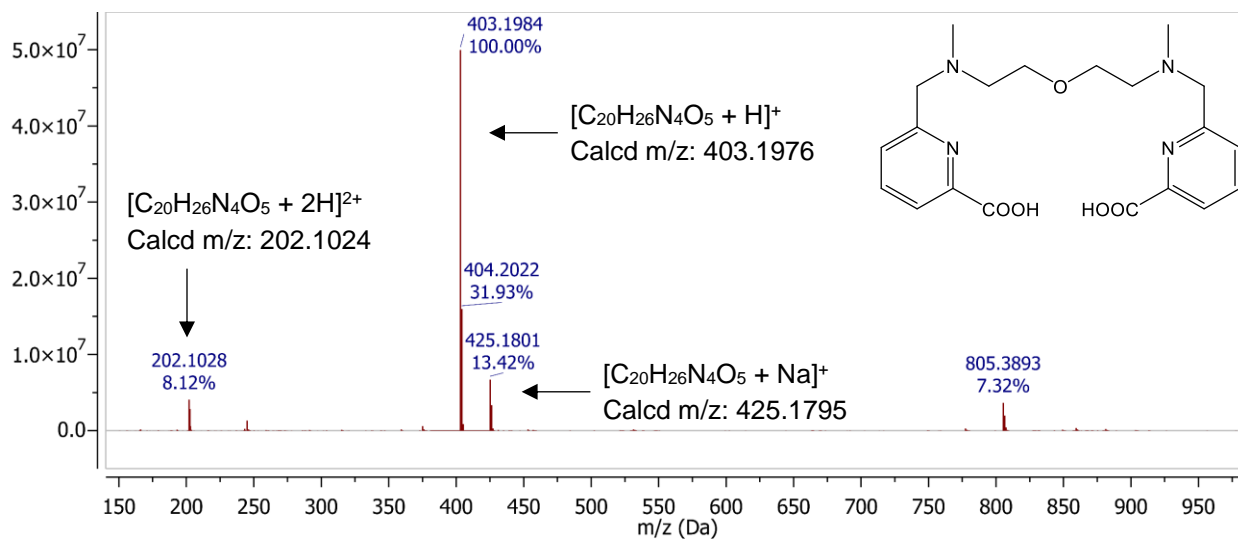

**Figure S13.** ESI-HRMS of **OxyMepa**. MeCN was used as the mobile phase.

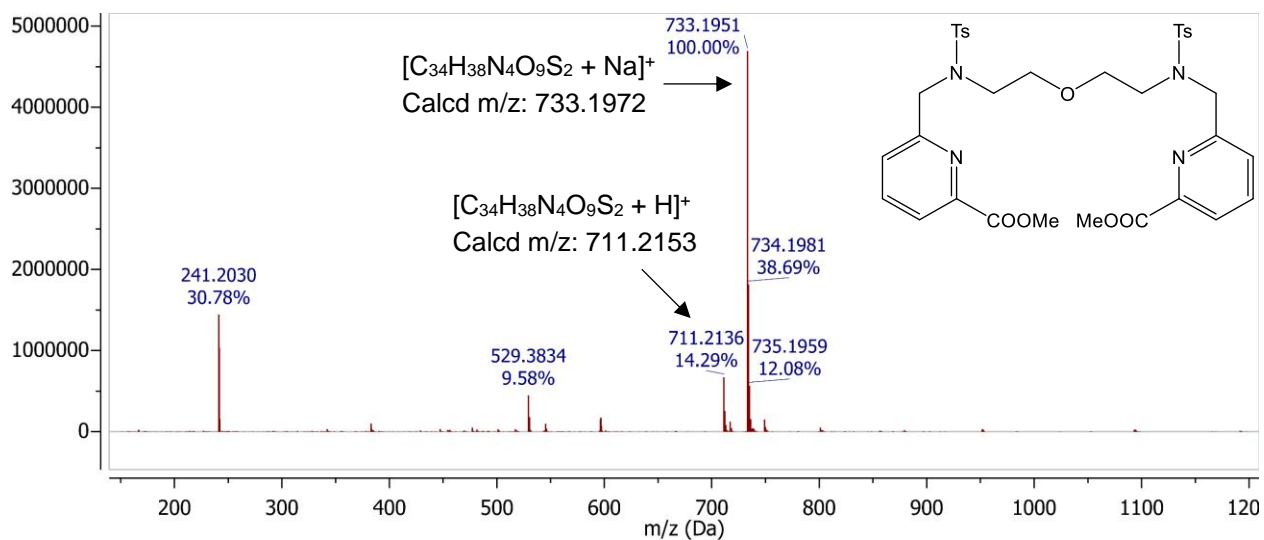

**Figure S14.** ESI-HRMS of **5**. MeCN was used as the mobile phase.

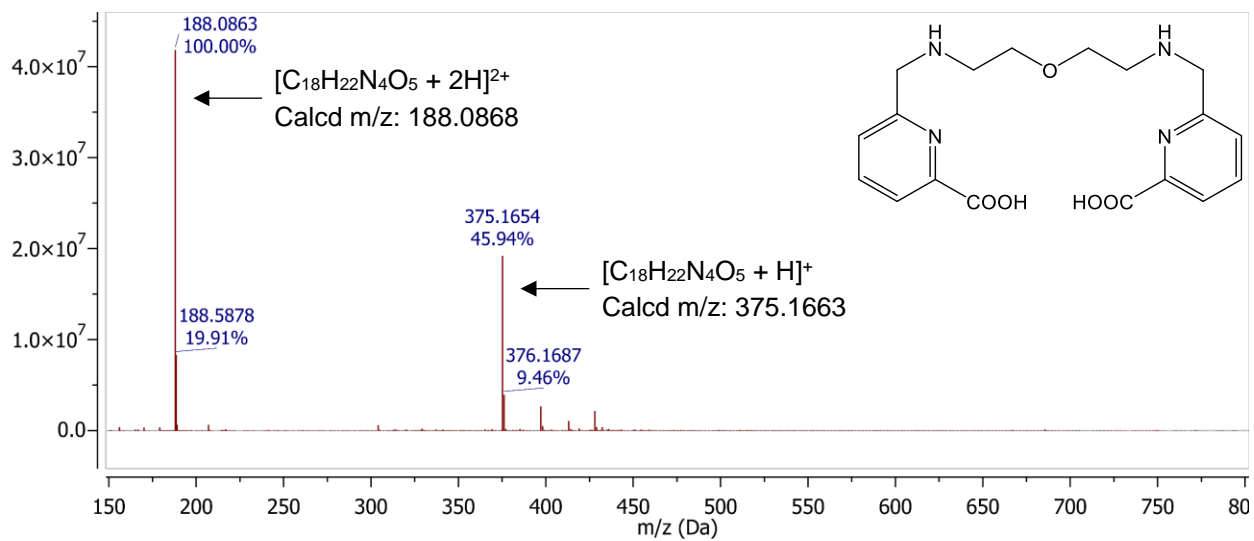

**Figure S15.** ESI-HRMS of **6**. MeCN was used as the mobile phase.

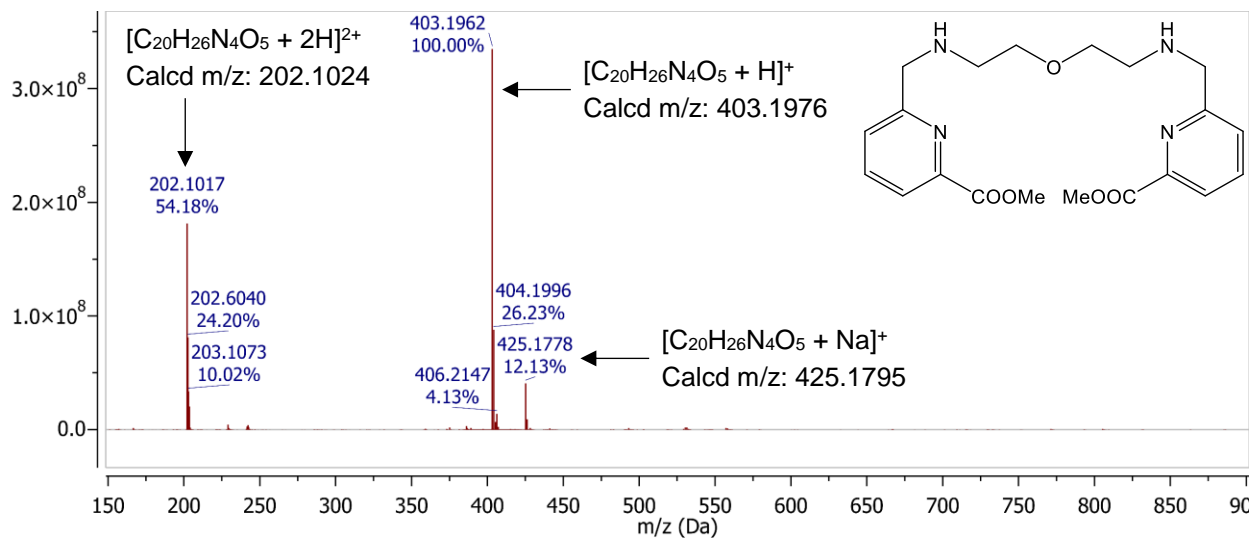

**Figure S16.** ESI-HRMS of 7. MeCN was used as the mobile phase.

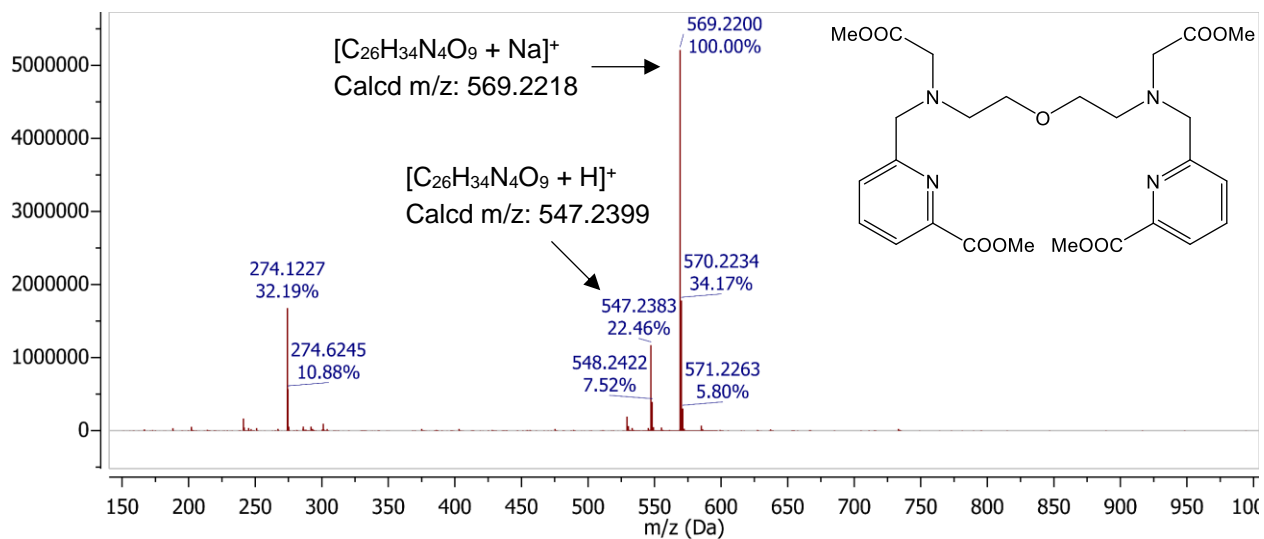

**Figure S17.** ESI-HRMS of 8. MeCN was used as the mobile phase.

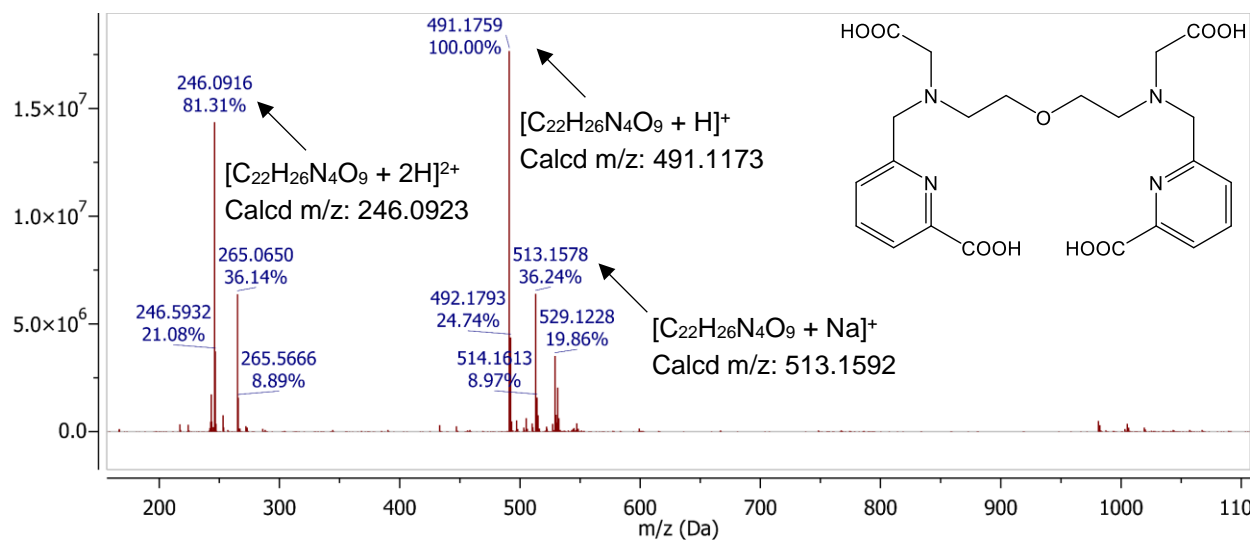

**Figure S18.** ESI-HRMS of Oxyaapa. MeCN was used as the mobile phase.



### 3. Analytical HPLC Chromatograms

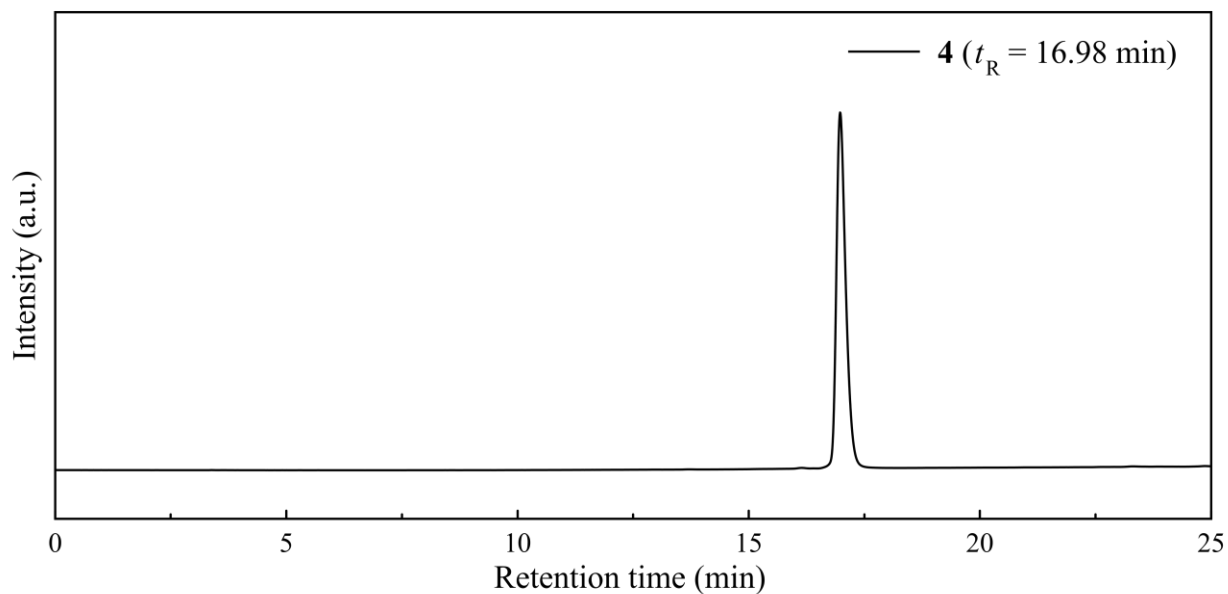

**Figure S19.** HPLC chromatogram of **4**. Method: 0–5 min, 90% H<sub>2</sub>O/MeOH; 5–25 min, 90% → 0% H<sub>2</sub>O/MeOH.

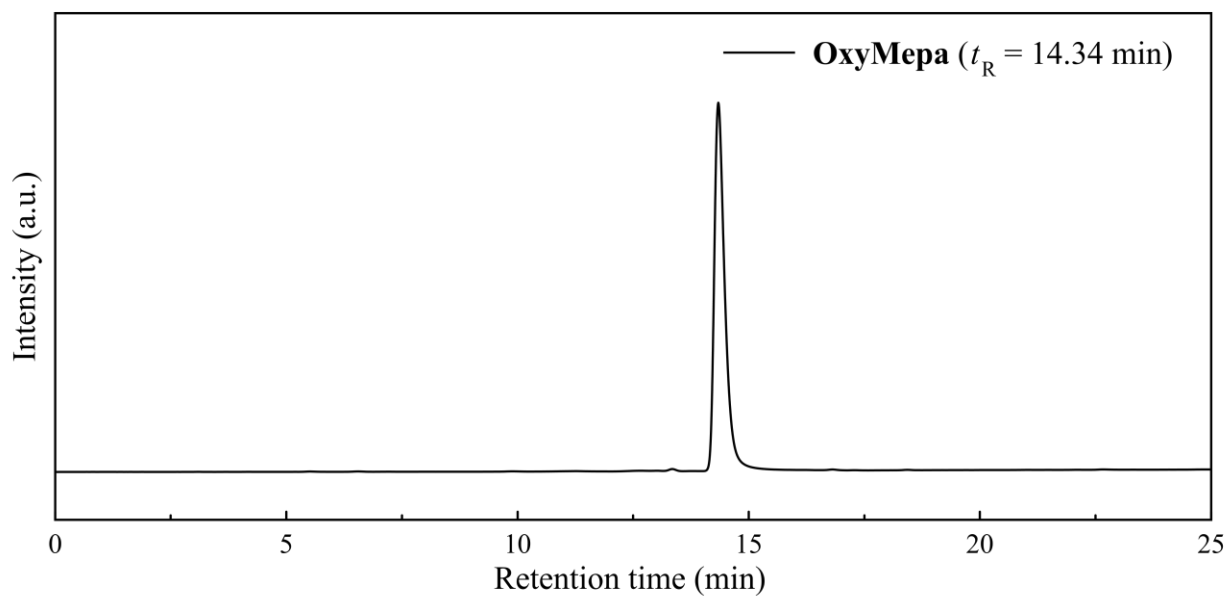

**Figure S20.** HPLC chromatogram of **OxyMepa**. Method: 0–5 min, 90% H<sub>2</sub>O/MeOH; 5–25 min, 90% → 0% H<sub>2</sub>O/MeOH.

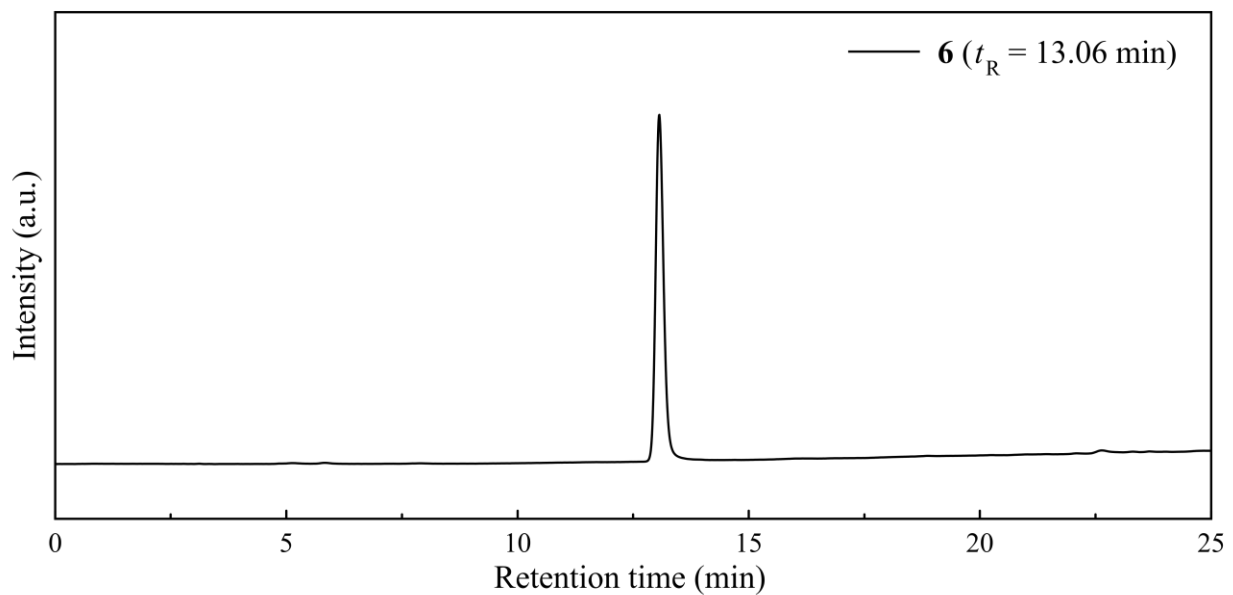

**Figure S21.** HPLC chromatogram of **6**. Method: 0–5 min, 90% H<sub>2</sub>O/MeOH; 5–25 min, 90% → 0% H<sub>2</sub>O/MeOH.

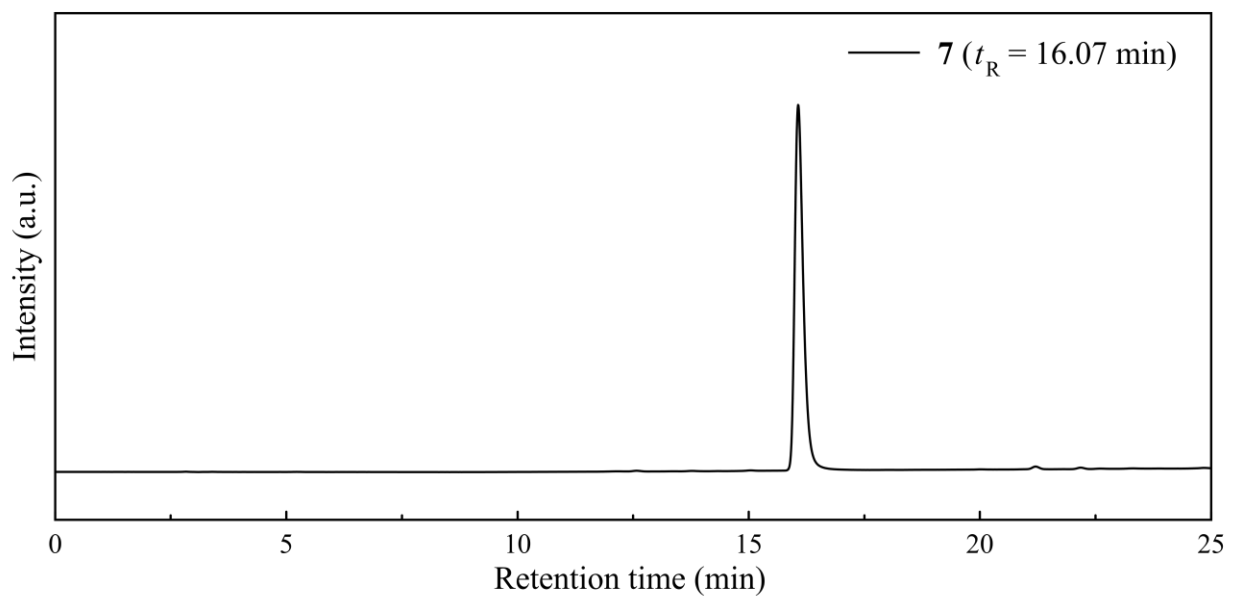

**Figure S22.** HPLC chromatogram of **7**. Method: 0–5 min, 90% H<sub>2</sub>O/MeOH; 5–25 min, 90% → 0% H<sub>2</sub>O/MeOH.

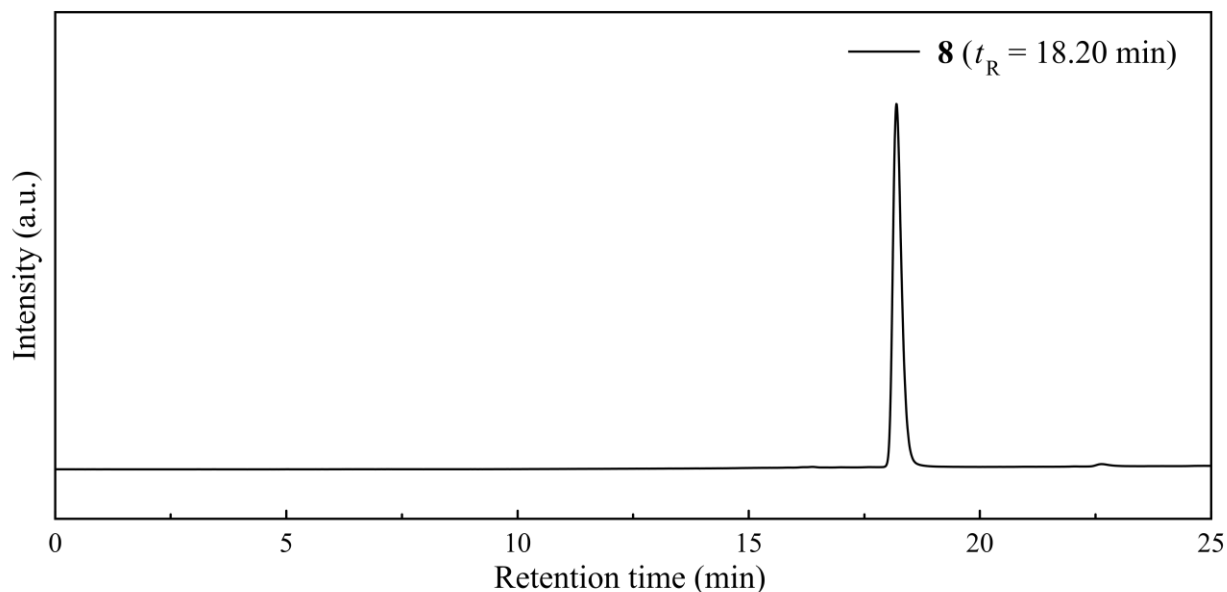

**Figure S23.** HPLC chromatogram of **8**. Method: 0–5 min, 90% H<sub>2</sub>O/MeOH; 5–25 min, 90% → 0% H<sub>2</sub>O/MeOH.

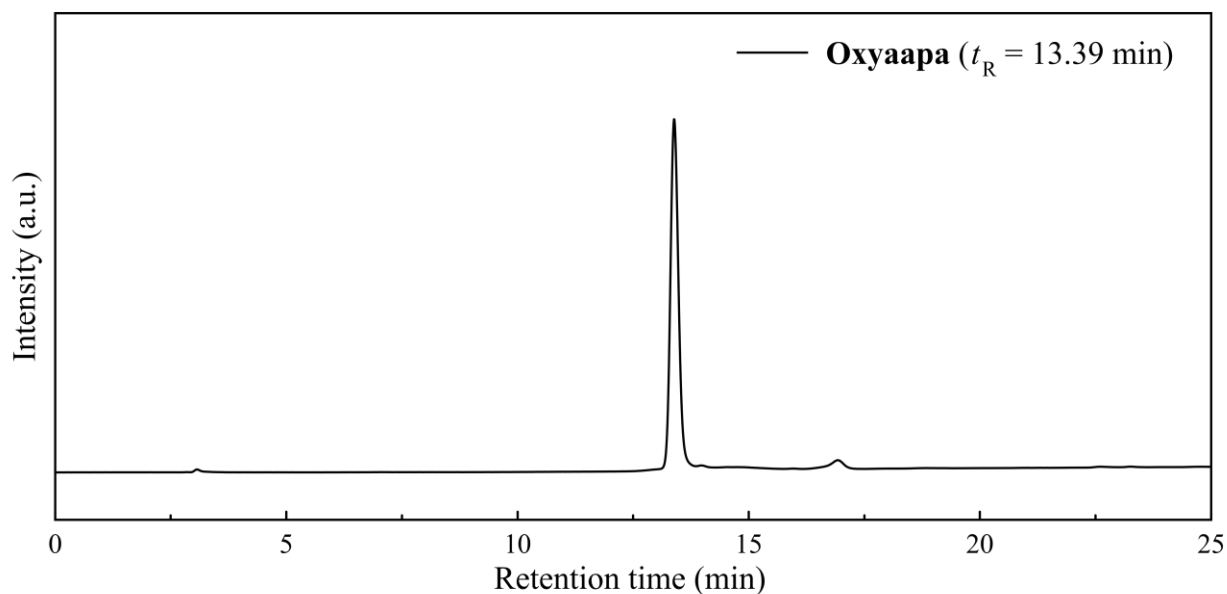

**Figure S24.** HPLC chromatogram of **Oxyaapa**. Method: 0–5 min, 90% H<sub>2</sub>O/MeOH; 5–25 min, 90% → 0% H<sub>2</sub>O/MeOH. We noticed that Oxyaapa, as a strong metal binder, was able to catch trace metal (e.g. iron from the injection syringe) under the HPLC condition, which could give chromatograms with more than one peak and strange peak shape.

## 4. Potentiometric Titrations

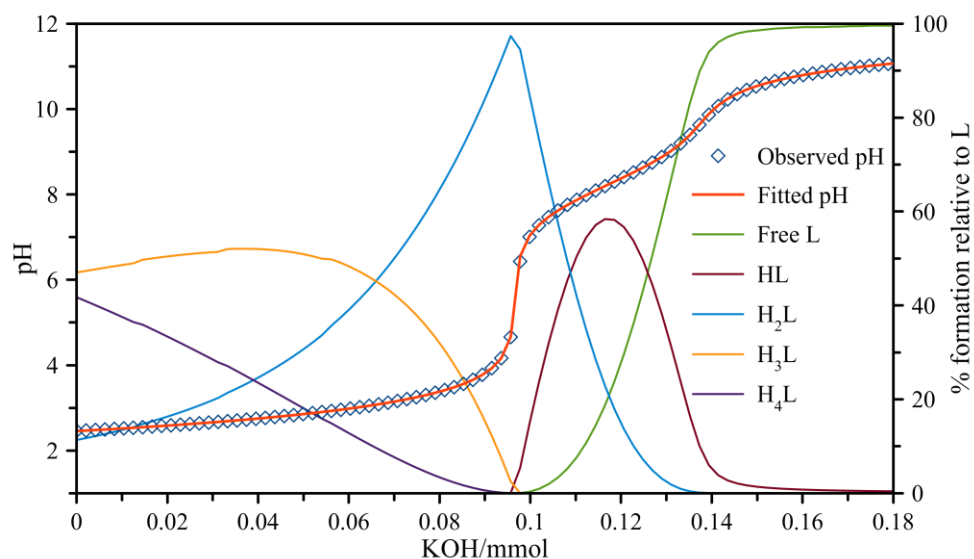

**Figure S25.** Representative protonation constant determination of OxyMepa by potentiometric titration.  $c_{\text{OxyMepa}} = 1 \times 10^{-3}$  M. Data fitting and speciation distribution over the titration pH range are shown. Sigma value of this refinement = 0.423.

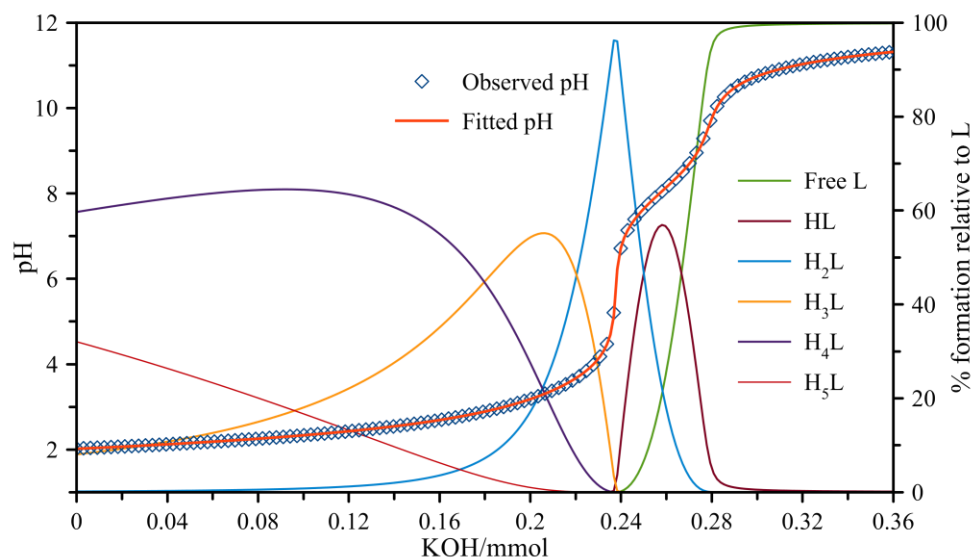

**Figure S26.** Representative protonation constant determination of Oxyaapa by potentiometric titration.  $c_{\text{Oxyaapa}} = 1 \times 10^{-3}$  M. Data fitting and speciation distribution over the titration pH range are shown. Sigma value of this refinement = 0.847.

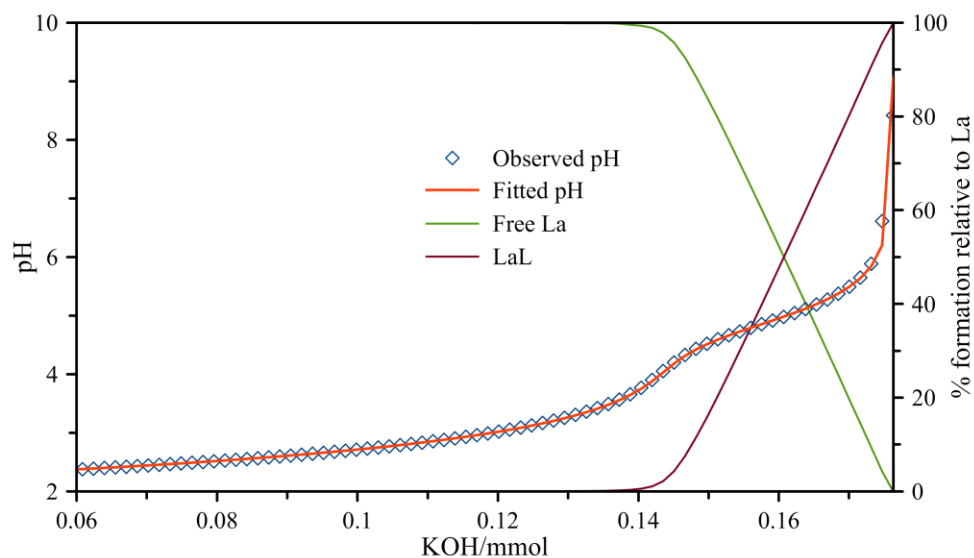

**Figure S27.** Representative stability constant determination of La-OxyMepa system by potentiometric titration.  $c_{\text{La}} = c_{\text{OxyMepa}} = 1 \times 10^{-3}$  M. Data fitting and speciation distribution over the titration pH range are shown. Sigma value of this refinement = 0.699.

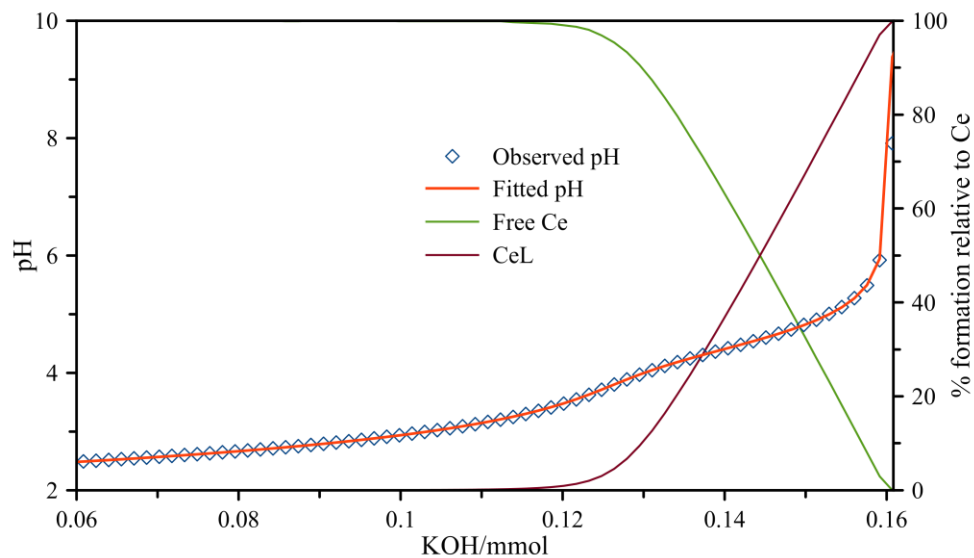

**Figure S28.** Representative stability constant determination of Ce-OxyMepa system by potentiometric titration.  $c_{\text{Ce}} = c_{\text{OxyMepa}} = 1 \times 10^{-3}$  M. Data fitting and speciation distribution over the titration pH range are shown. Sigma value of this refinement = 0.390.

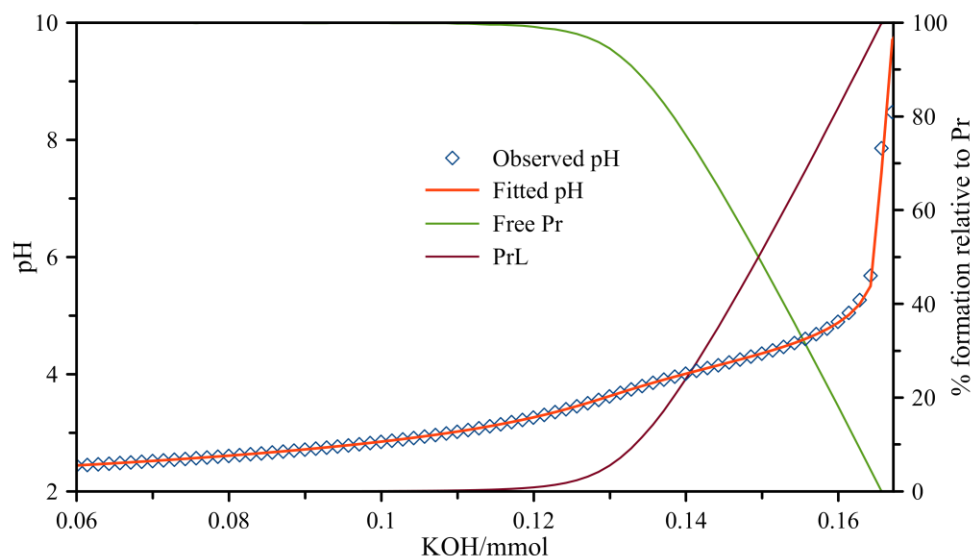

**Figure S29.** Representative stability constant determination of Pr-OxyMepa system by potentiometric titration.  $c_{\text{Pr}} = c_{\text{OxyMepa}} = 1 \times 10^{-3}$  M. Data fitting and speciation distribution over the titration pH range are shown. Sigma value of this refinement = 0.862.

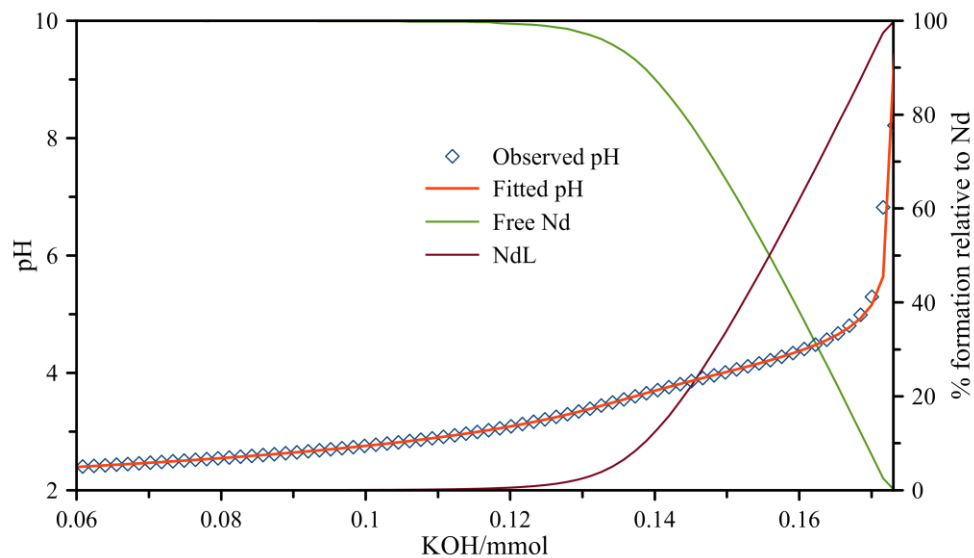

**Figure S30.** Representative stability constant determination of Nd-OxyMepa system by potentiometric titration.  $c_{\text{Nd}} = c_{\text{OxyMepa}} = 1 \times 10^{-3}$  M. Data fitting and speciation distribution over the titration pH range are shown. Sigma value of this refinement = 0.406.

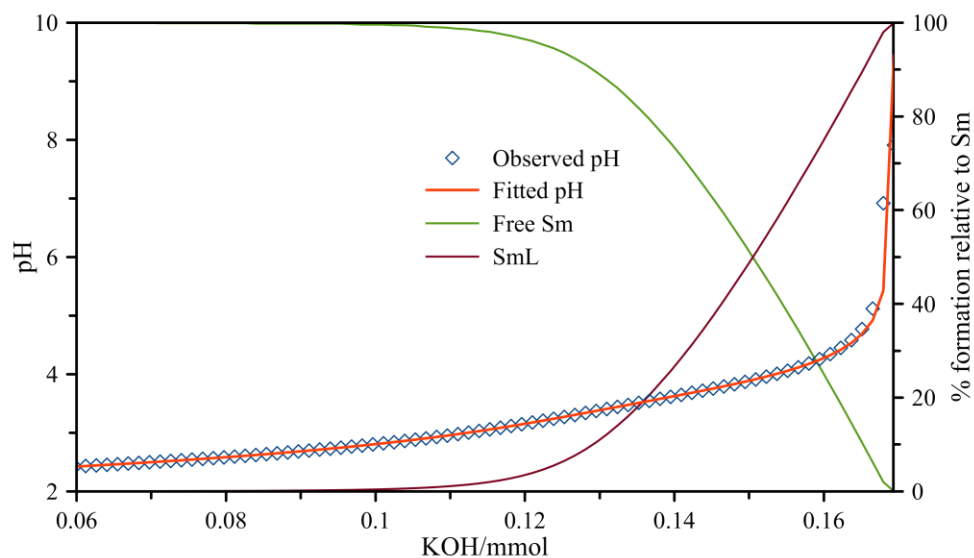

**Figure S31.** Representative stability constant determination of Sm-OxyMepa system by potentiometric titration.  $c_{\text{Sm}} = c_{\text{OxyMepa}} = 1 \times 10^{-3}$  M. Data fitting and speciation distribution over the titration pH range are shown. Sigma value of this refinement = 0.492.

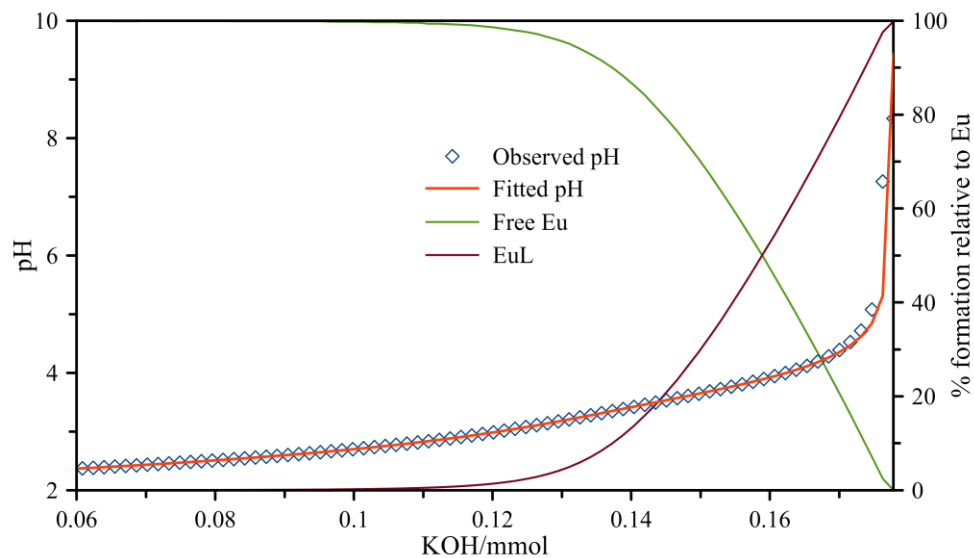

**Figure S32.** Representative stability constant determination of Eu-OxyMepa system by potentiometric titration.  $c_{\text{Eu}} = c_{\text{OxyMepa}} = 1 \times 10^{-3}$  M. Data fitting and speciation distribution over the titration pH range are shown. Sigma value of this refinement = 0.573.

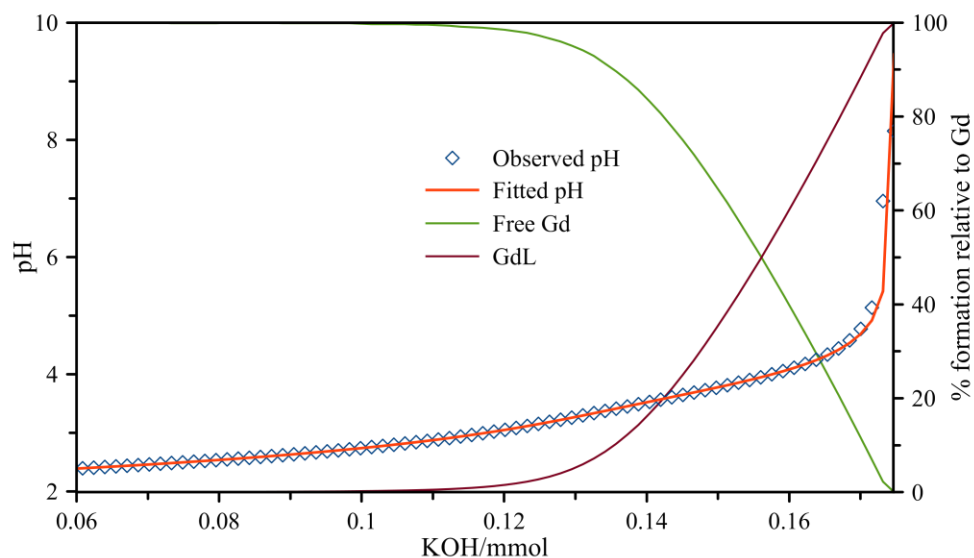

**Figure S33.** Representative stability constant determination of Gd-OxyMepa system by potentiometric titration.  $c_{\text{Gd}} = c_{\text{OxyMepa}} = 1 \times 10^{-3}$  M. Data fitting and speciation distribution over the titration pH range are shown. Sigma value of this refinement = 0.487.

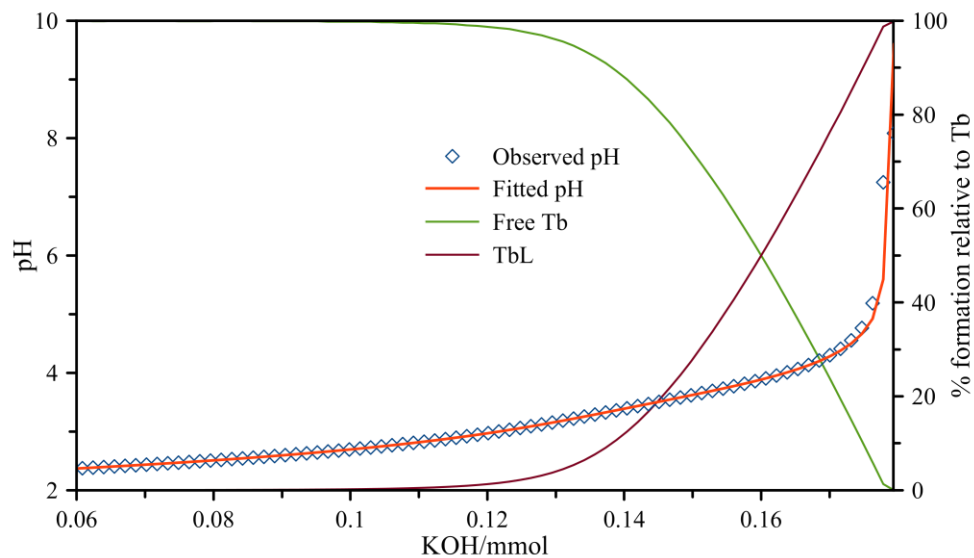

**Figure S34.** Representative stability constant determination of Tb-OxyMepa system by potentiometric titration.  $c_{\text{Tb}} = c_{\text{OxyMepa}} = 1 \times 10^{-3}$  M. Data fitting and speciation distribution over the titration pH range are shown. Sigma value of this refinement = 0.506.



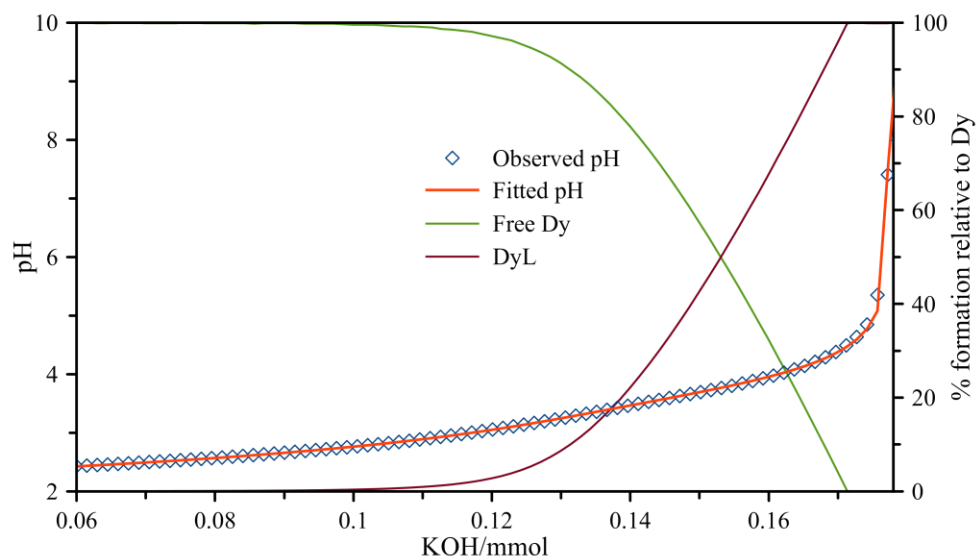

**Figure S35.** Representative stability constant determination of Dy-OxyMepa system by potentiometric titration.  $c_{\text{Dy}} = c_{\text{OxyMepa}} = 1 \times 10^{-3}$  M. Data fitting and speciation distribution over the titration pH range are shown. Sigma value of this refinement = 0.596.

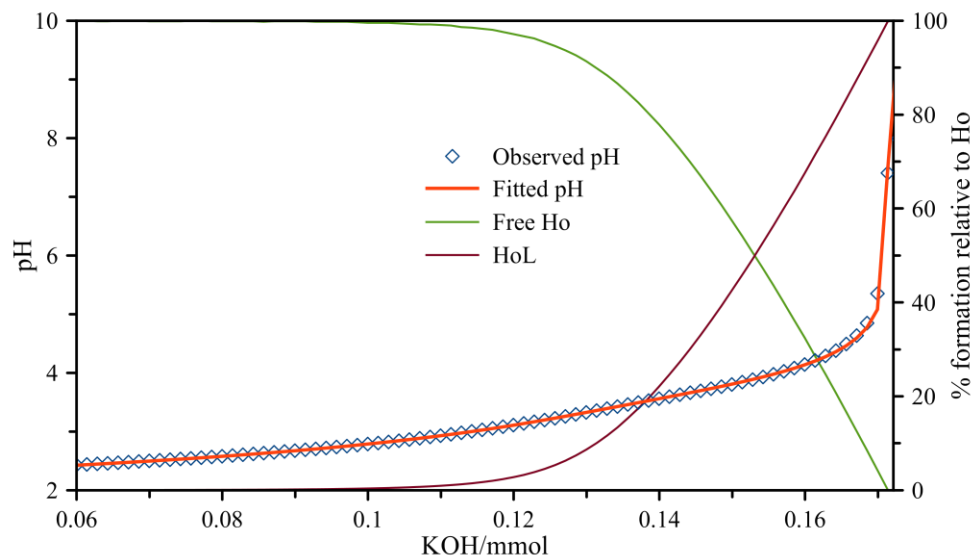

**Figure S36.** Representative stability constant determination of Ho-OxyMepa system by potentiometric titration.  $c_{\text{Ho}} = c_{\text{OxyMepa}} = 1 \times 10^{-3}$  M. Data fitting and speciation distribution over the titration pH range are shown. Sigma value of this refinement = 0.515.

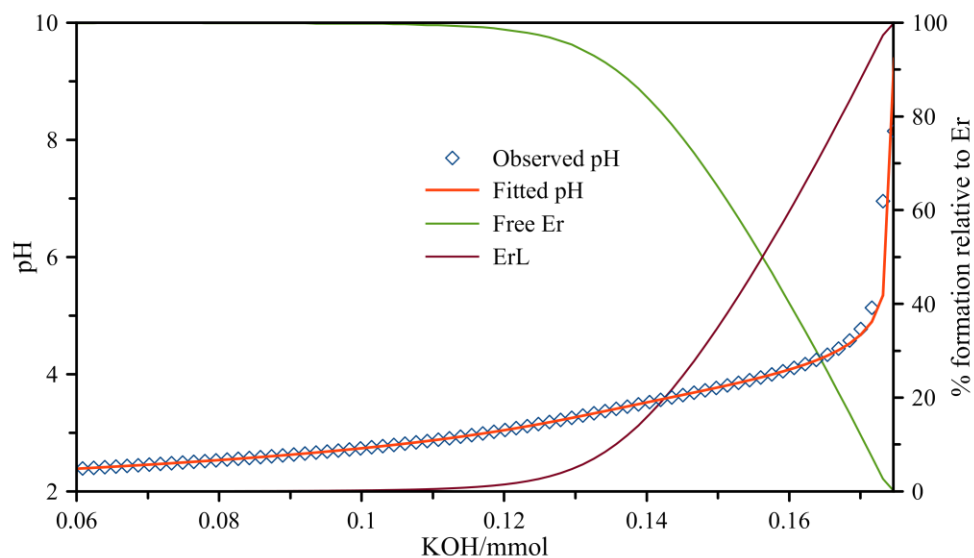

**Figure S37.** Representative stability constant determination of Er-OxyMepa system by potentiometric titration.  $c_{\text{Er}} = c_{\text{OxyMepa}} = 1 \times 10^{-3}$  M. Data fitting and speciation distribution over the titration pH range are shown. Sigma value of this refinement = 0.571.

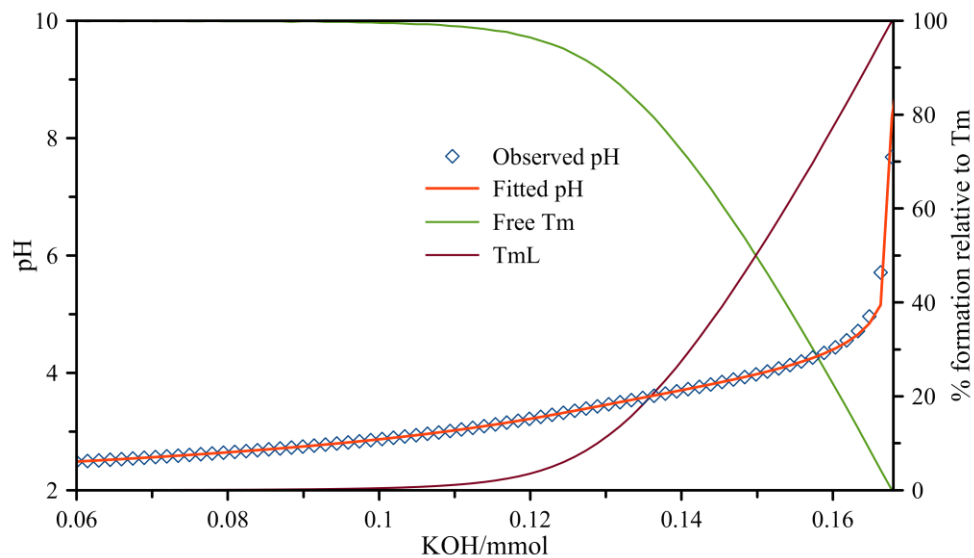

**Figure S38.** Representative stability constant determination of Tm-OxyMepa system by potentiometric titration.  $c_{\text{Tm}} = c_{\text{OxyMepa}} = 1 \times 10^{-3}$  M. Data fitting and speciation distribution over the titration pH range are shown. Sigma value of this refinement = 0.553.

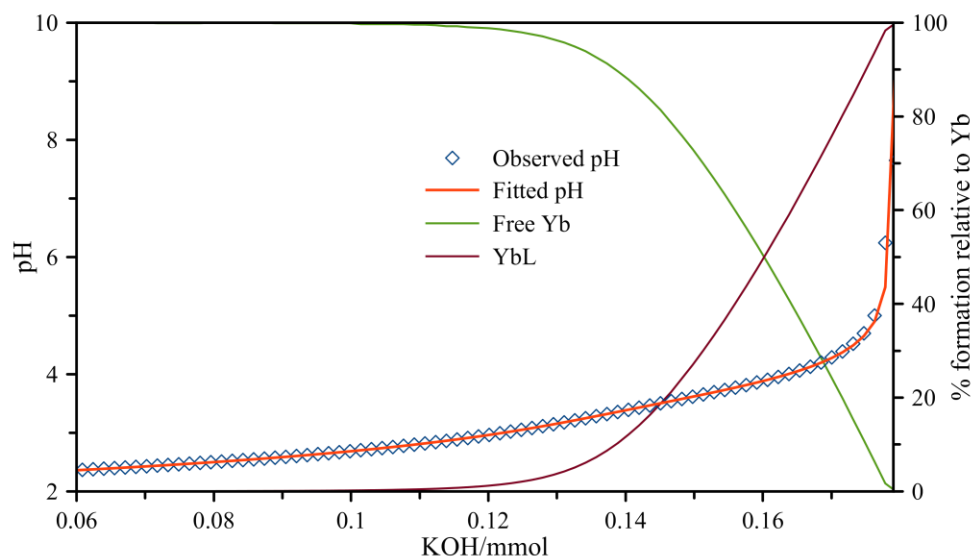

**Figure S39.** Representative stability constant determination of Yb-OxyMepa system by potentiometric titration.  $c_{\text{Yb}} = c_{\text{OxyMepa}} = 1 \times 10^{-3}$  M. Data fitting and speciation distribution over the titration pH range are shown. Sigma value of this refinement = 0.327.

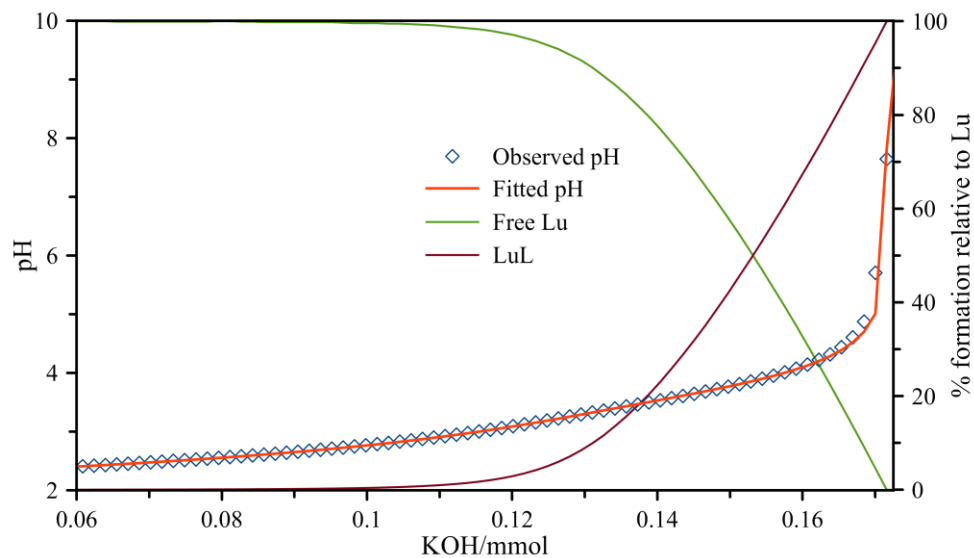

**Figure 40.** Representative stability constant determination of Lu-OxyMepa system by potentiometric titration.  $c_{\text{Lu}} = c_{\text{OxyMepa}} = 1 \times 10^{-3}$  M. Data fitting and speciation distribution over the titration pH range are shown. Sigma value of this refinement = 0.781.

## 5. UV–Vis Spectroscopic Titrations

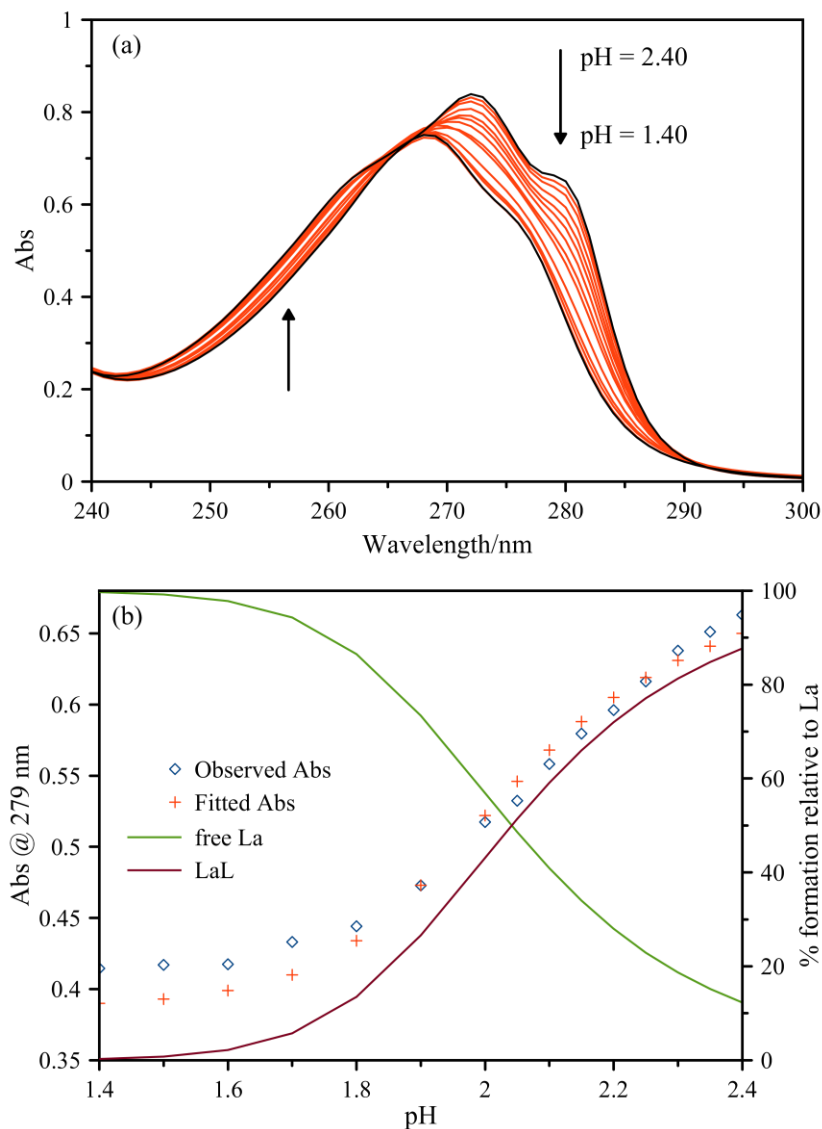

**Figure S41.** Representative UV–Vis spectroscopic titration of La-Oxyaapa system.  $c_{\text{La}} = c_{\text{Oxyaapa}} = 1 \times 10^{-4}$  M. (a) UV–Vis spectral change over the titration pH range; (b) Data fitting at 279 nm (where the most significant spectral change occurs) and speciation distribution over the titration pH range. Sigma value of this refinement = 0.011935.

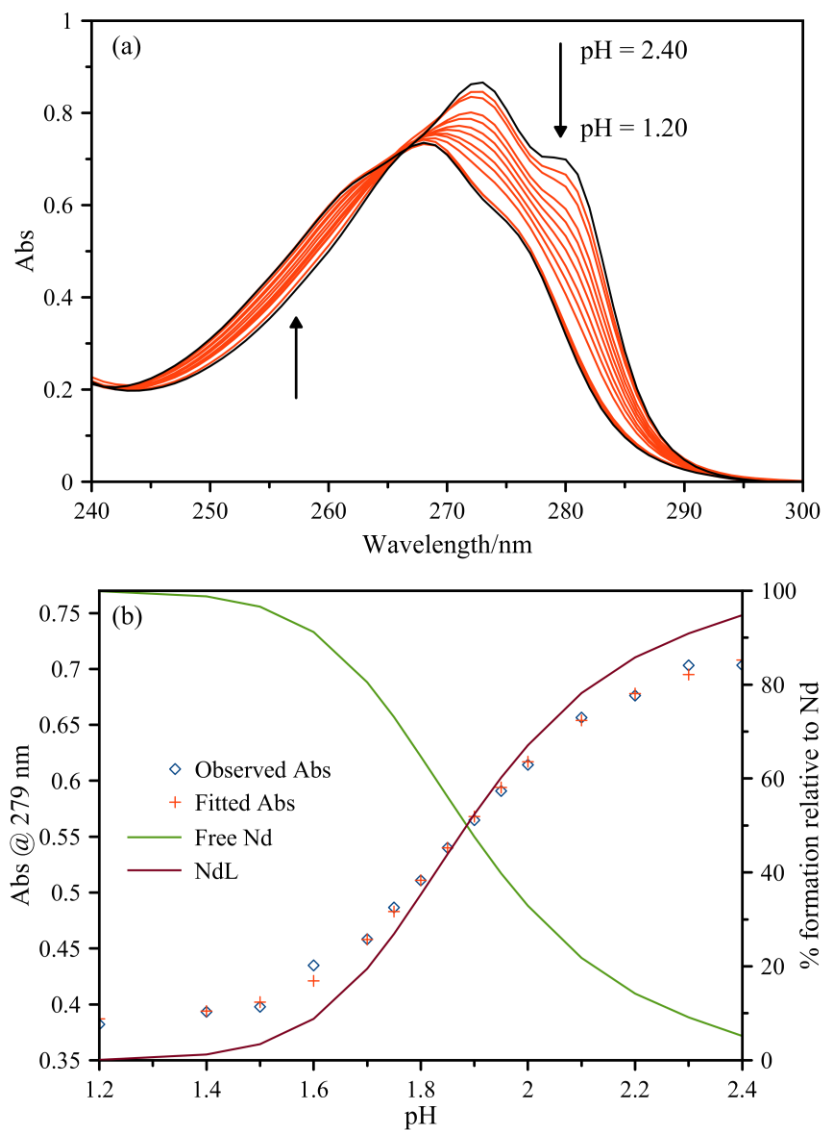

**Figure S42.** Representative UV–Vis spectroscopic titration of Nd-Oxyaapa system.  $c_{\text{Nd}} = c_{\text{Oxyaapa}} = 1 \times 10^{-4}$  M. (a) UV–Vis spectral change over the titration pH range; (b) Data fitting at 279 nm (where the most significant spectral change occurs) and speciation distribution over the titration pH range. Sigma value of this refinement = 0.007266.

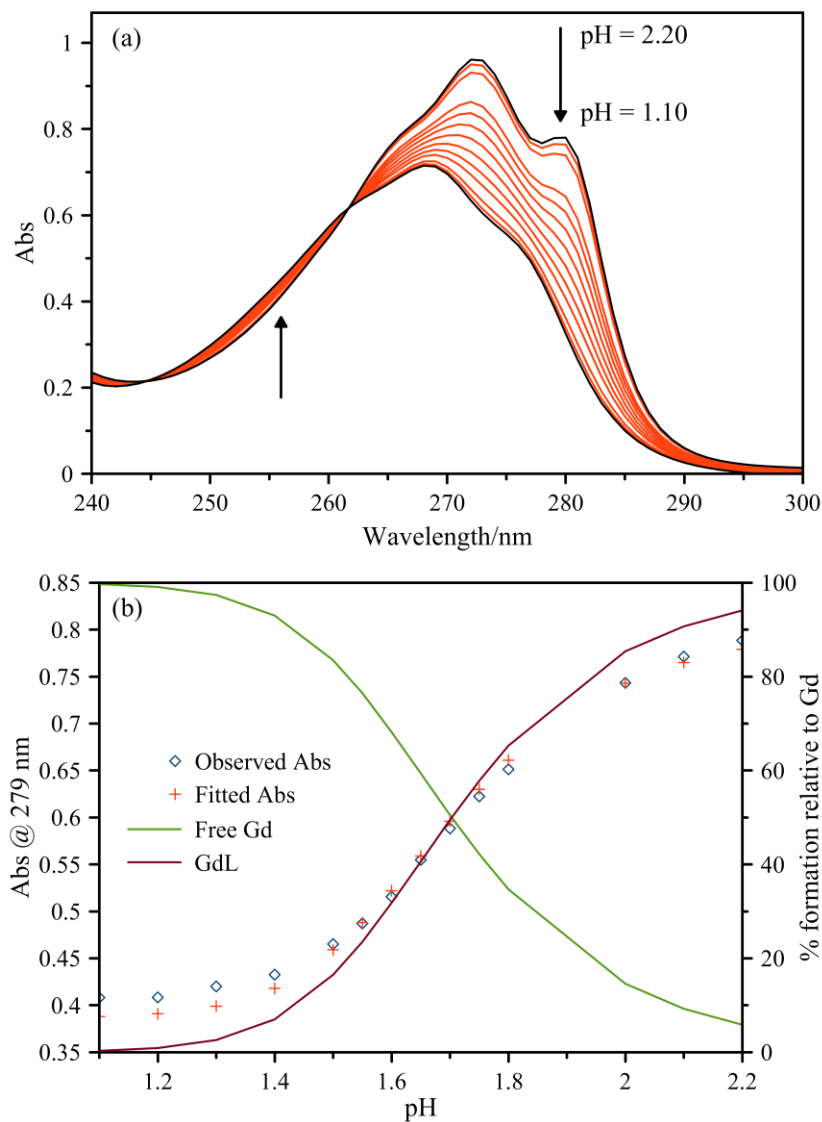

**Figure S43.** Representative UV–Vis spectroscopic titration of Gd-Oxyaapa system.  $c_{\text{Gd}} = c_{\text{Oxyaapa}} = 1 \times 10^{-4}$  M. (a) UV–Vis spectral change over the titration pH range; (b) Data fitting at 279 nm (where the most significant spectral change occurs) and speciation distribution over the titration pH range. Sigma value of this refinement = 0.013949.

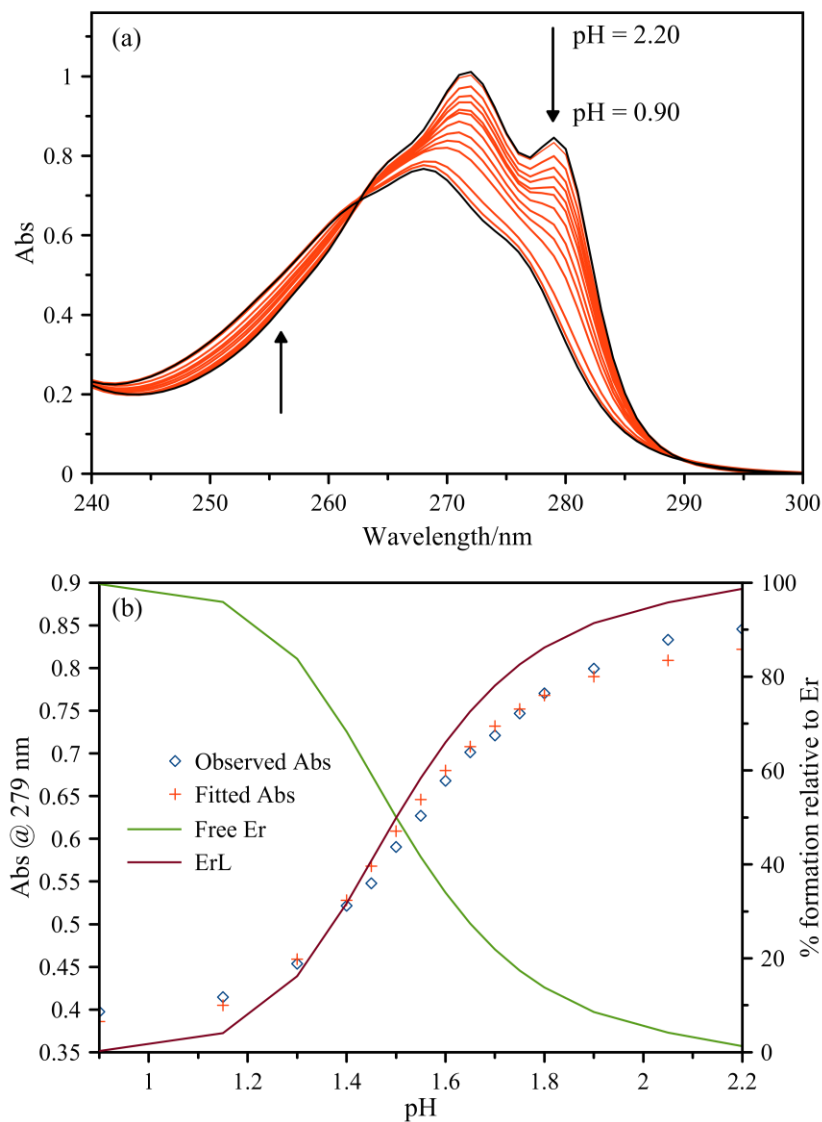

**Figure S44.** Representative UV–Vis spectroscopic titration of Er–Oxyaapa system.  $c_{\text{Er}} = c_{\text{Oxyaapa}} = 1 \times 10^{-4}$  M. (a) UV–Vis spectral change over the titration pH range; (b) Data fitting at 279 nm (where the most significant spectral change occurs) and speciation distribution over the titration pH range. Sigma value of this refinement = 0.014679.

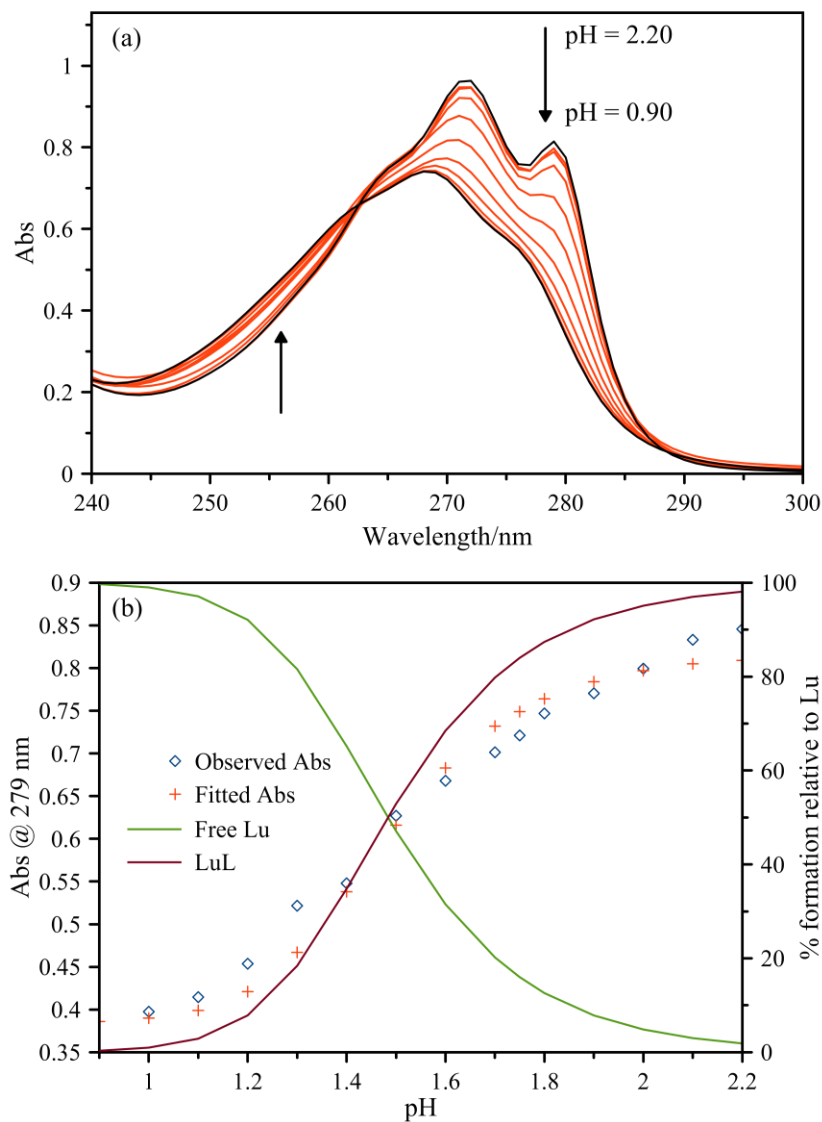

**Figure S45.** Representative UV–Vis spectroscopic titration of Lu-Oxyaapa system.  $c_{\text{Lu}} = c_{\text{Oxyaapa}} = 1 \times 10^{-4}$  M. (a) UV–Vis spectral change over the titration pH range; (b) Data fitting at 279 nm (where the most significant spectral change occurs) and speciation distribution over the titration pH range. Sigma value of this refinement = 0.014015.



**Table S1.** pM values of OxyMepa and Oxyaapa complexes formed with lanthanide ions. pM is defined as the  $-\log [M]_{\text{free}}$  value when  $[M]_{\text{total}} = 10^{-6}$  M and  $[L]_{\text{total}} = 10^{-5}$  M at pH = 7.4.

|     | OxyMepa | Oxyaapa |
|-----|---------|---------|
| pLa | 9.0     | 18.5    |
| pCe | 9.8     |         |
| pPr | 10.3    |         |
| pNd | 10.6    | 19.2    |
| pSm | 11.2    |         |
| pEu | 11.2    |         |
| pGd | 11.1    | 19.9    |
| pTb | 11.2    |         |
| pDy | 11.3    |         |
| pHo | 11.2    |         |
| pEr | 11.1    | 20.8    |
| pTm | 11.1    |         |
| pYb | 11.2    |         |
| pLu | 11.3    | 21.1    |

## 6. DTPA Transchelation Studies

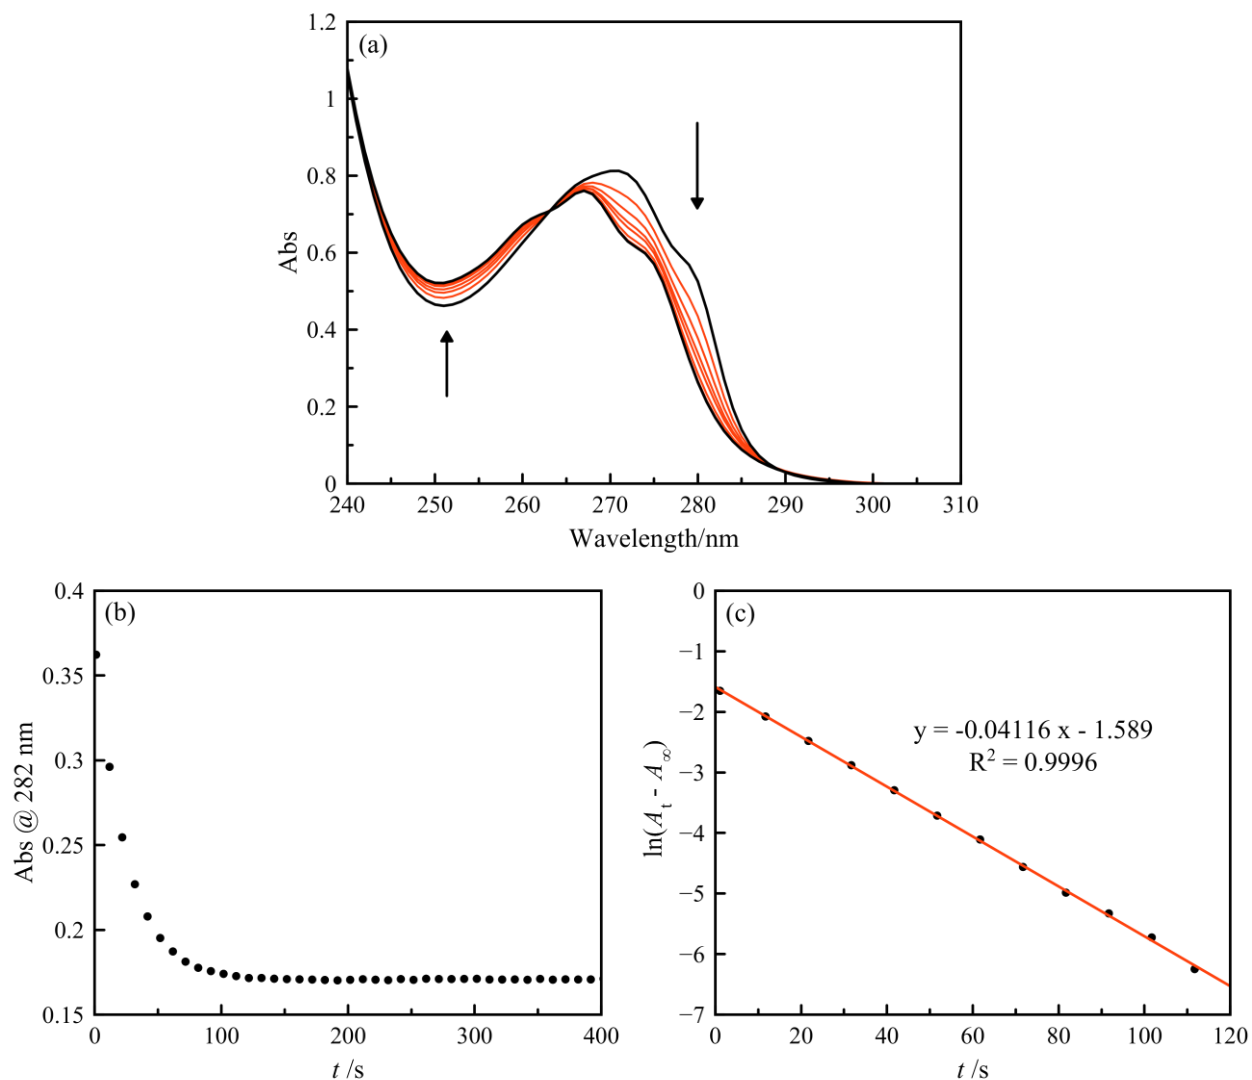

**Figure S46.** DTPA transchelation challenge on Gd-OxyMepa complex (100  $\mu$ M complex with 10 mM DTPA). (a) UV-Vis spectral change over the transchelation reaction; (b) The absorbance change at 282 nm versus time; (c) The linear fit to the first-order kinetics model.

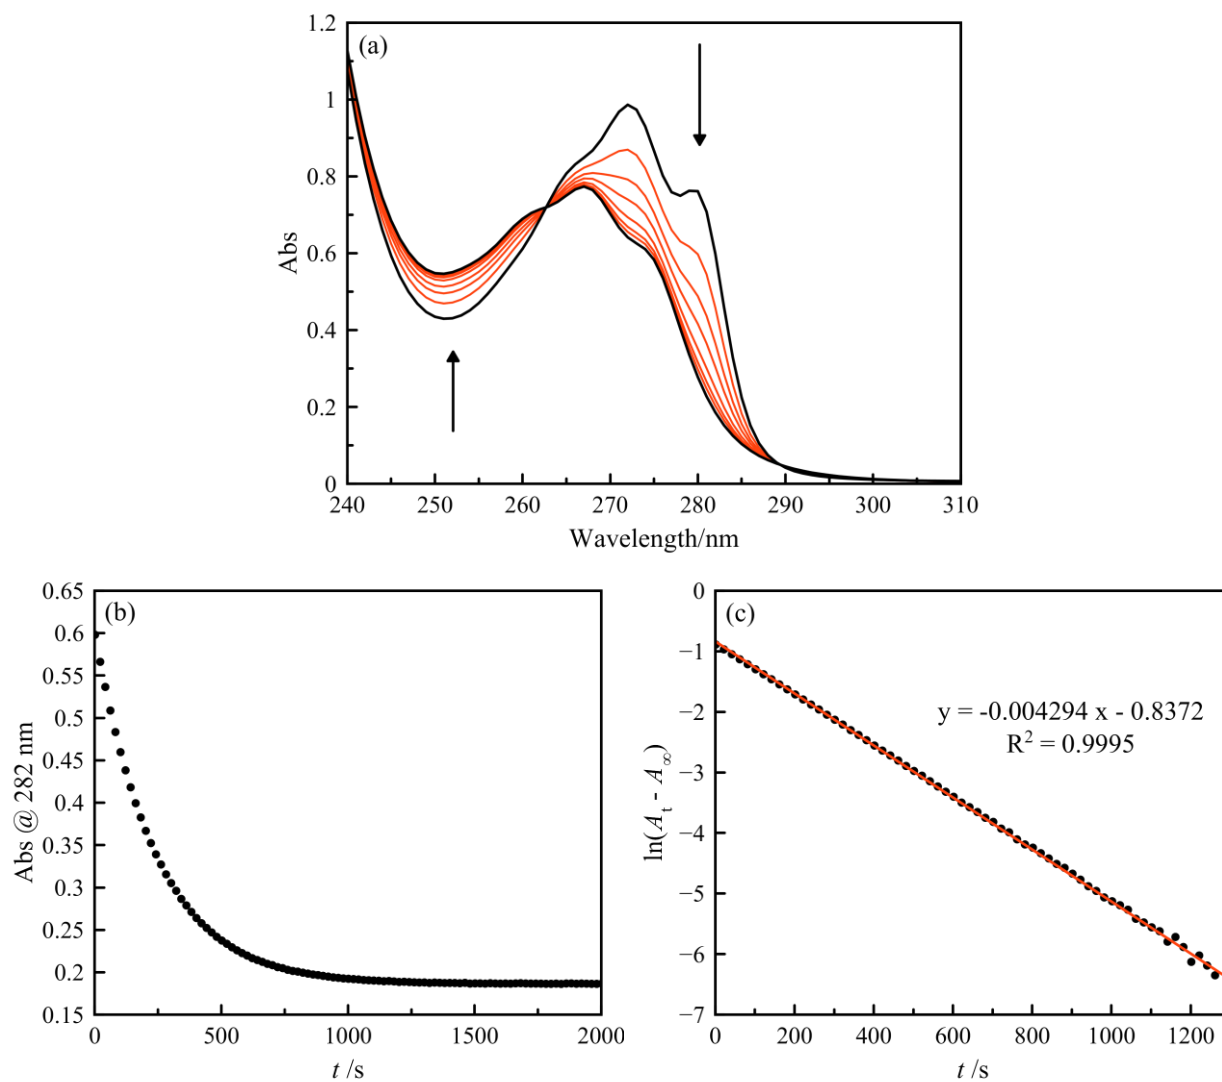

**Figure S47.** DTPA transchelation challenge on Lu-OxyMepa complex (100  $\mu$ M complex with 10 mM DTPA). (a) UV-Vis spectral change over the transchelation reaction; (b) The absorbance change at 282 nm versus time; (c) The linear fit to the first-order kinetics model.

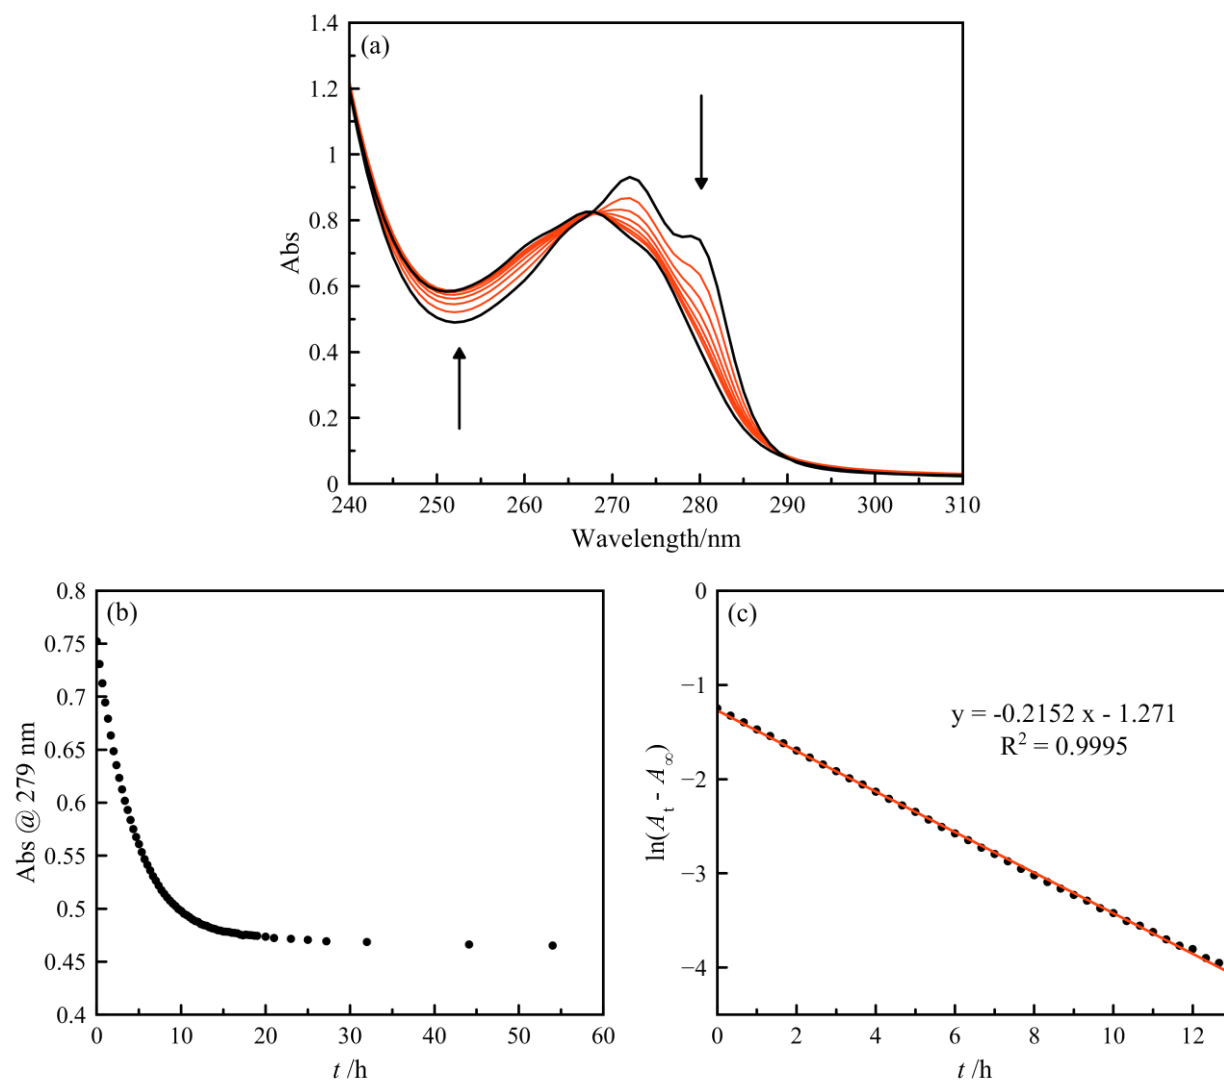

**Figure S48.** DTPA transchelation challenge on La-Oxyaapa complex (100  $\mu\text{M}$  complex with 10 mM DTPA). (a) UV-Vis spectral change over the transchelation reaction; (b) The absorbance change at 279 nm versus time; (c) The linear fit to the first-order kinetics model.

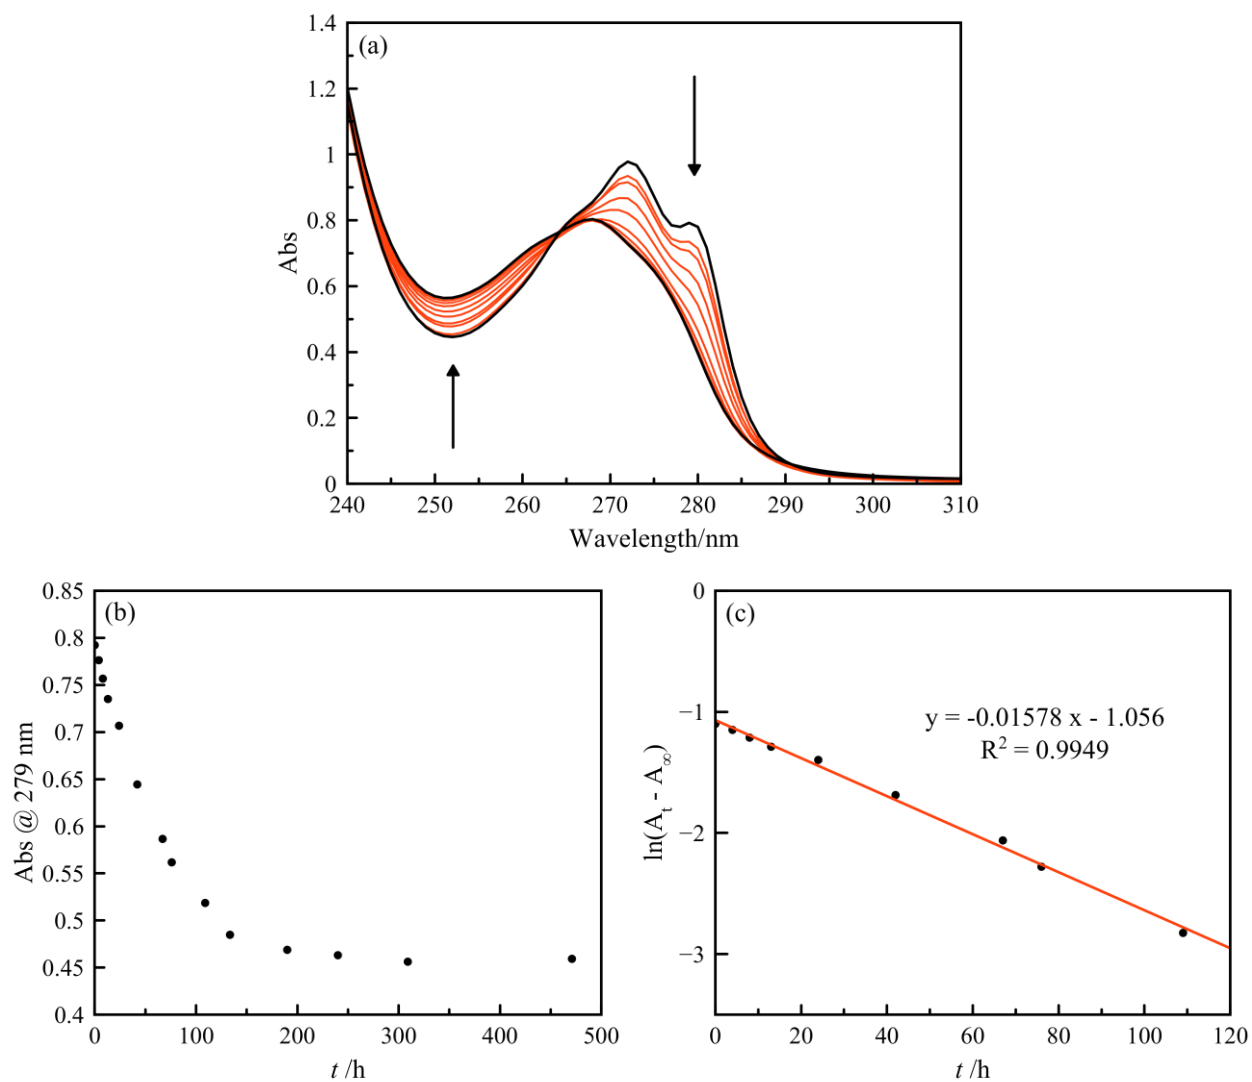

**Figure S49.** DTPA transchelation challenge on Gd-Oxyaapa complex (100  $\mu$ M complex with 10 mM DTPA). (a) UV-Vis spectral change over the transchelation reaction; (b) The absorbance change at 279 nm versus time; (c) The linear fit to the first-order kinetics model.

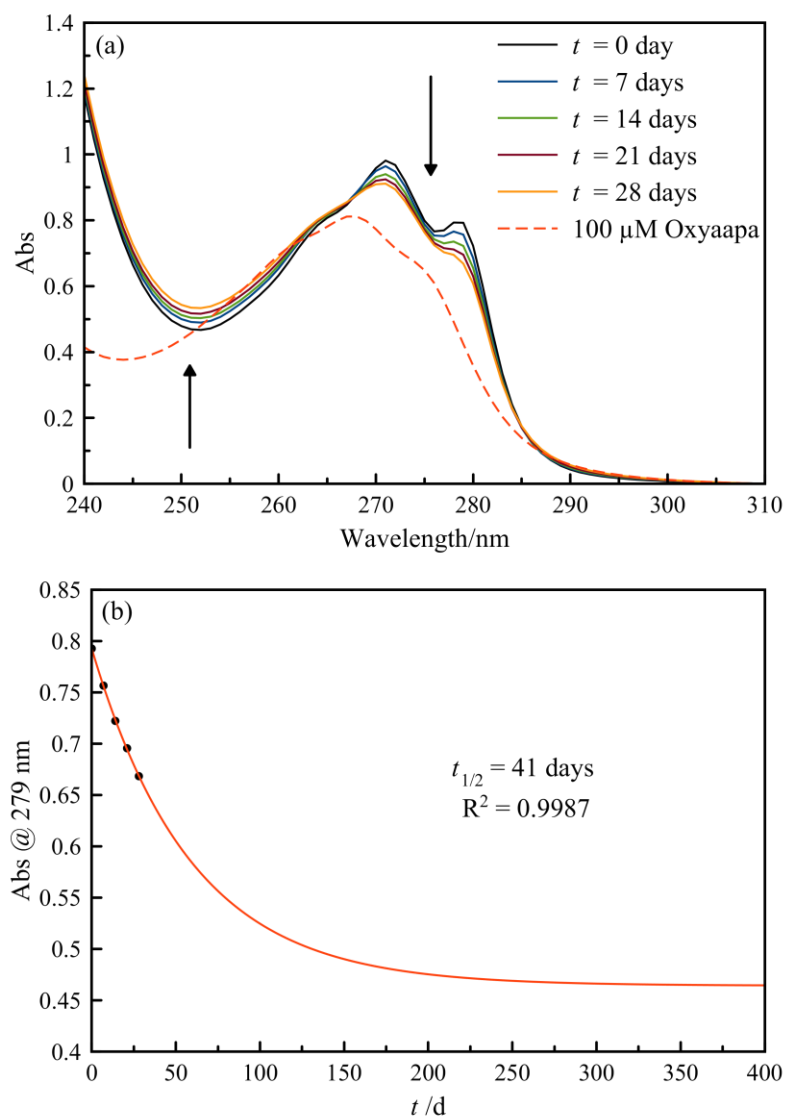

**Figure S50.** DTPA transchelation challenge on Lu-Oxyaapa complex (100  $\mu\text{M}$  complex with 10 mM DTPA). (a) UV-Vis spectral change over the transchelation reaction (the complex showed ~65% intactness after 4 weeks); (b) The absorbance change at 279 nm versus time. The data points are fitted to a standard exponential decay model to estimate the half-life, which is about 41 days.

## 7. X-Ray Crystallography

**Table S2.** X-ray crystal data and structure refinement details for Lu-OxyMepa and Lu-Oxyaapa.

|                                                            | Lu-OxyMepa                                                                       | Lu-Oxyaapa                                                                                          |
|------------------------------------------------------------|----------------------------------------------------------------------------------|-----------------------------------------------------------------------------------------------------|
| Empirical formula                                          | C <sub>20</sub> H <sub>26</sub> F <sub>6</sub> LuN <sub>4</sub> O <sub>6</sub> P | C <sub>44</sub> H <sub>64</sub> ClLu <sub>2</sub> N <sub>8</sub> Na <sub>3</sub> O <sub>30.50</sub> |
| Formula weight                                             | 738.39                                                                           | 1647.39                                                                                             |
| Crystal system                                             | Monoclinic                                                                       | Triclinic                                                                                           |
| Space group                                                | <i>P</i> 2 <sub>1</sub> / <i>c</i>                                               | <i>P</i> $\bar{1}$                                                                                  |
| <i>a</i> (Å)                                               | 16.8531(4)                                                                       | 10.05350(10)                                                                                        |
| <i>b</i> (Å)                                               | 9.0126(2)                                                                        | 11.6225(2)                                                                                          |
| <i>c</i> (Å)                                               | 16.5519(4)                                                                       | 13.9236(2)                                                                                          |
| $\alpha$ (°)                                               | 90                                                                               | 103.0180(10)                                                                                        |
| $\beta$ (°)                                                | 102.365(2)                                                                       | 103.8080(10)                                                                                        |
| $\gamma$ (°)                                               | 90                                                                               | 100.8710(10)                                                                                        |
| <i>V</i> (Å <sup>3</sup> )                                 | 2455.75(10)                                                                      | 1487.95(4)                                                                                          |
| <i>Z</i>                                                   | 4                                                                                | 1                                                                                                   |
| $\rho_{\text{calc}}$ (10 <sup>3</sup> kg·m <sup>-3</sup> ) | 1.997                                                                            | 1.838                                                                                               |
| $\mu$ (mm <sup>-1</sup> )                                  | 4.176                                                                            | 3.462                                                                                               |
| <i>T</i> (K)                                               | 252.99(10)                                                                       | 252.99(10)                                                                                          |
| $\lambda$ (Å)                                              | 0.71073                                                                          | 0.71073                                                                                             |
| $\theta$ range (°)                                         | 2.474–27.103                                                                     | 2.158–27.876                                                                                        |
| Reflections collected                                      | 30157                                                                            | 66345                                                                                               |
| Independent reflections                                    | 5429                                                                             | 7089                                                                                                |
| <i>R</i> <sub>int</sub>                                    | 0.0449                                                                           | 0.0638                                                                                              |
| Number of restraints                                       | 242                                                                              | 10                                                                                                  |
| Number of parameters                                       | 388                                                                              | 436                                                                                                 |
| Largest peak/hole (e·Å <sup>-3</sup> )                     | 1.103/-0.800                                                                     | 1.357/-1.177                                                                                        |
| GoF                                                        | 1.142                                                                            | 1.076                                                                                               |
| R1/wR2 (all data)                                          | 0.0340/0.0559                                                                    | 0.0246/0.0582                                                                                       |
| R1/wR2 (>2 $\theta$ )                                      | 0.0274/0.0541                                                                    | 0.0224/0.0568                                                                                       |

R1 =  $\sum||F_o| - |F_c||/|F_o|$ ; wR2 =  $\{\sum[w(F_o^2 - F_c^2)2]/\sum[w(F_o^2)^2]\}^{1/2}$

GoF =  $\{\sum[w(F_o^2 - F_c^2)^2]/(n - p)\}^{1/2}$ , where *n* is the number of data and *p* is the number of refined parameters.

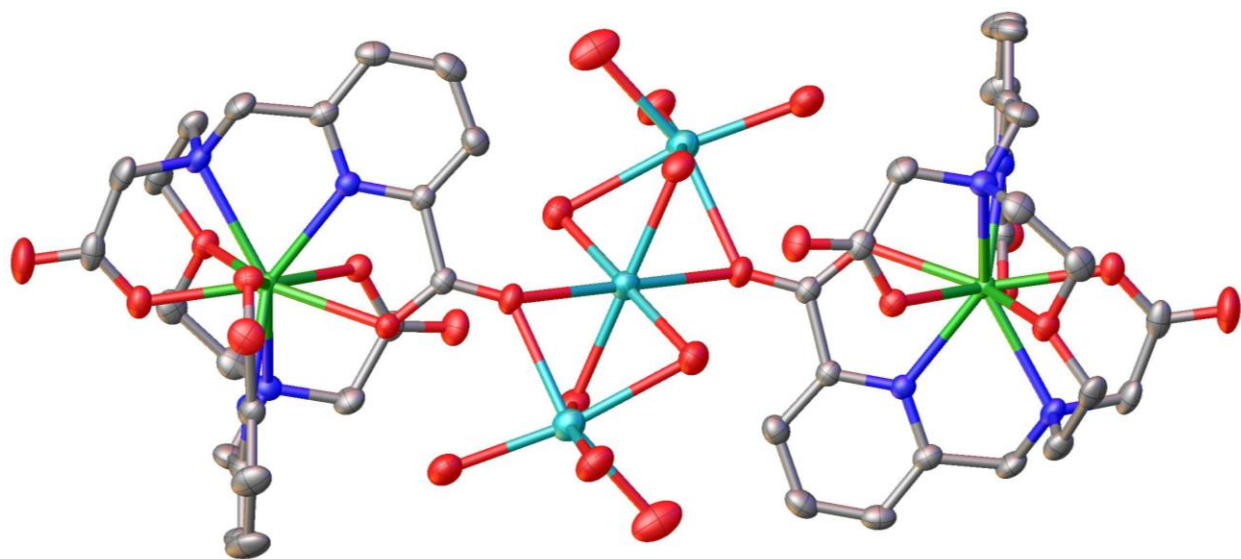

**Figure S51.** Crystal structure of Lu-Oxyaapa complex with the trisodium cationic moiety included. Solvent, counterions, and hydrogen atoms are omitted for clarity. Different types of atoms are drawn in different colors. Gray: C; Blue: N; Red: O; Cyan: Na; Green: Lu.



## 8. 2D NMR Spectra for Complex Solution Studies

(1) La-OxyMepa complex

**Table S3.** Peak assignments of NMR spectra on La-OxyMepa complex. See Chart 2 for the numbering scheme.

| Carbon/Hydrogen<br>Number | Symmetric, <i>anti</i> - |                  | Asymmetric, <i>syn</i> - |                  |
|---------------------------|--------------------------|------------------|--------------------------|------------------|
|                           | $\delta_C$ (ppm)         | $\delta_H$ (ppm) | $\delta_C$ (ppm)         | $\delta_H$ (ppm) |
| 1                         | 55.97                    | 3.01, 2.83       |                          | 3.13, 2.53       |
| 2                         | 69.27                    | 3.80, 3.76       |                          | 3.61, 3.36       |
| 3                         | 69.27                    | 3.80, 3.76       |                          | 4.08, 3.41       |
| 4                         | 55.97                    | 3.01, 2.83       |                          | 3.34, 2.79       |
| 5                         | 44.71                    | 2.42             | 45.58                    | 2.77             |
| 6                         | 44.71                    | 2.42             | 40.72                    | 2.25             |
| 7                         | 61.90                    | 4.23, 3.94       |                          | 4.42, 4.06       |
| 8                         | 157.68                   |                  |                          |                  |
| 9                         | 126.01                   | 7.69             |                          | 7.71             |
| 10                        | 141.31                   | 8.13             |                          | 8.14             |
| 11                        | 123.99                   | 8.05             |                          | 8.05             |
| 12                        | 151.29                   |                  |                          |                  |
| 13                        | 173.09                   |                  |                          |                  |
| 14                        | 61.90                    | 4.23, 3.94       |                          | 4.71, 3.75       |
| 15                        | 157.68                   |                  |                          |                  |
| 16                        | 126.01                   | 7.69             |                          | 7.71             |
| 17                        | 141.31                   | 8.13             |                          | 8.14             |
| 18                        | 123.99                   | 8.05             |                          | 8.05             |
| 19                        | 151.29                   |                  |                          |                  |
| 20                        | 173.09                   |                  |                          |                  |

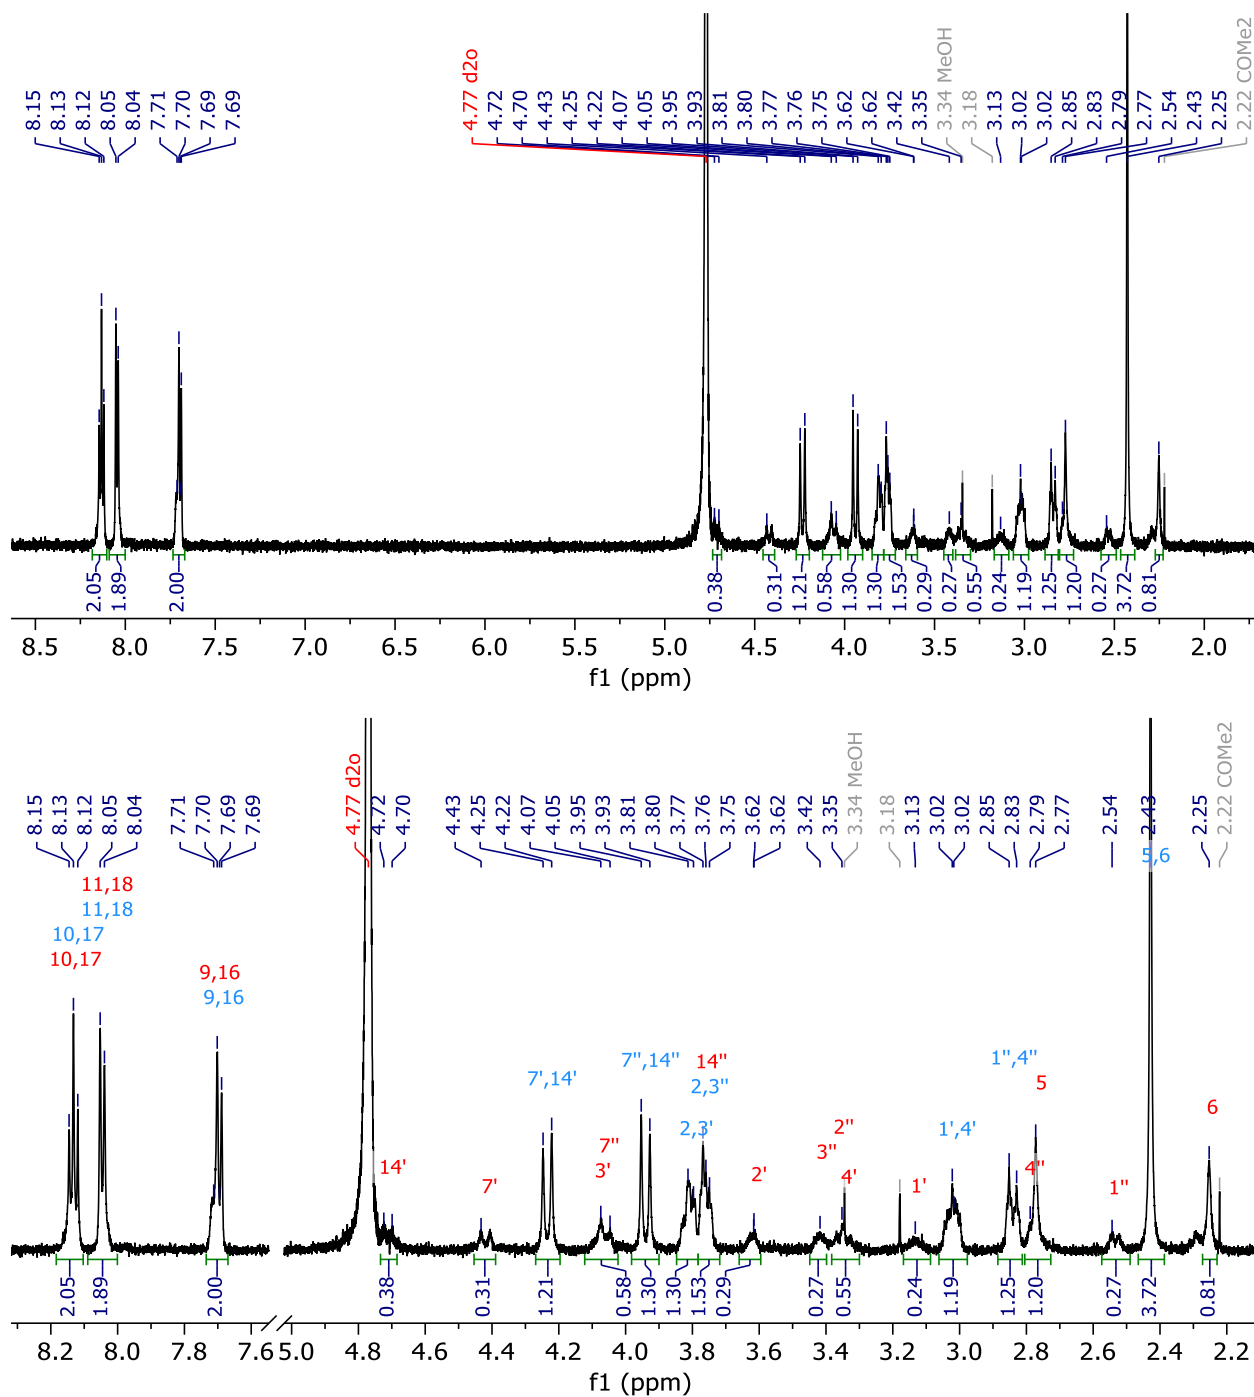

**Figure S52.** Full (top) as well as properly expanded and labeled (bottom) <sup>1</sup>H NMR spectrum (600 MHz, D<sub>2</sub>O, pD = 7, 25 °C) of La-OxyMepa complex.

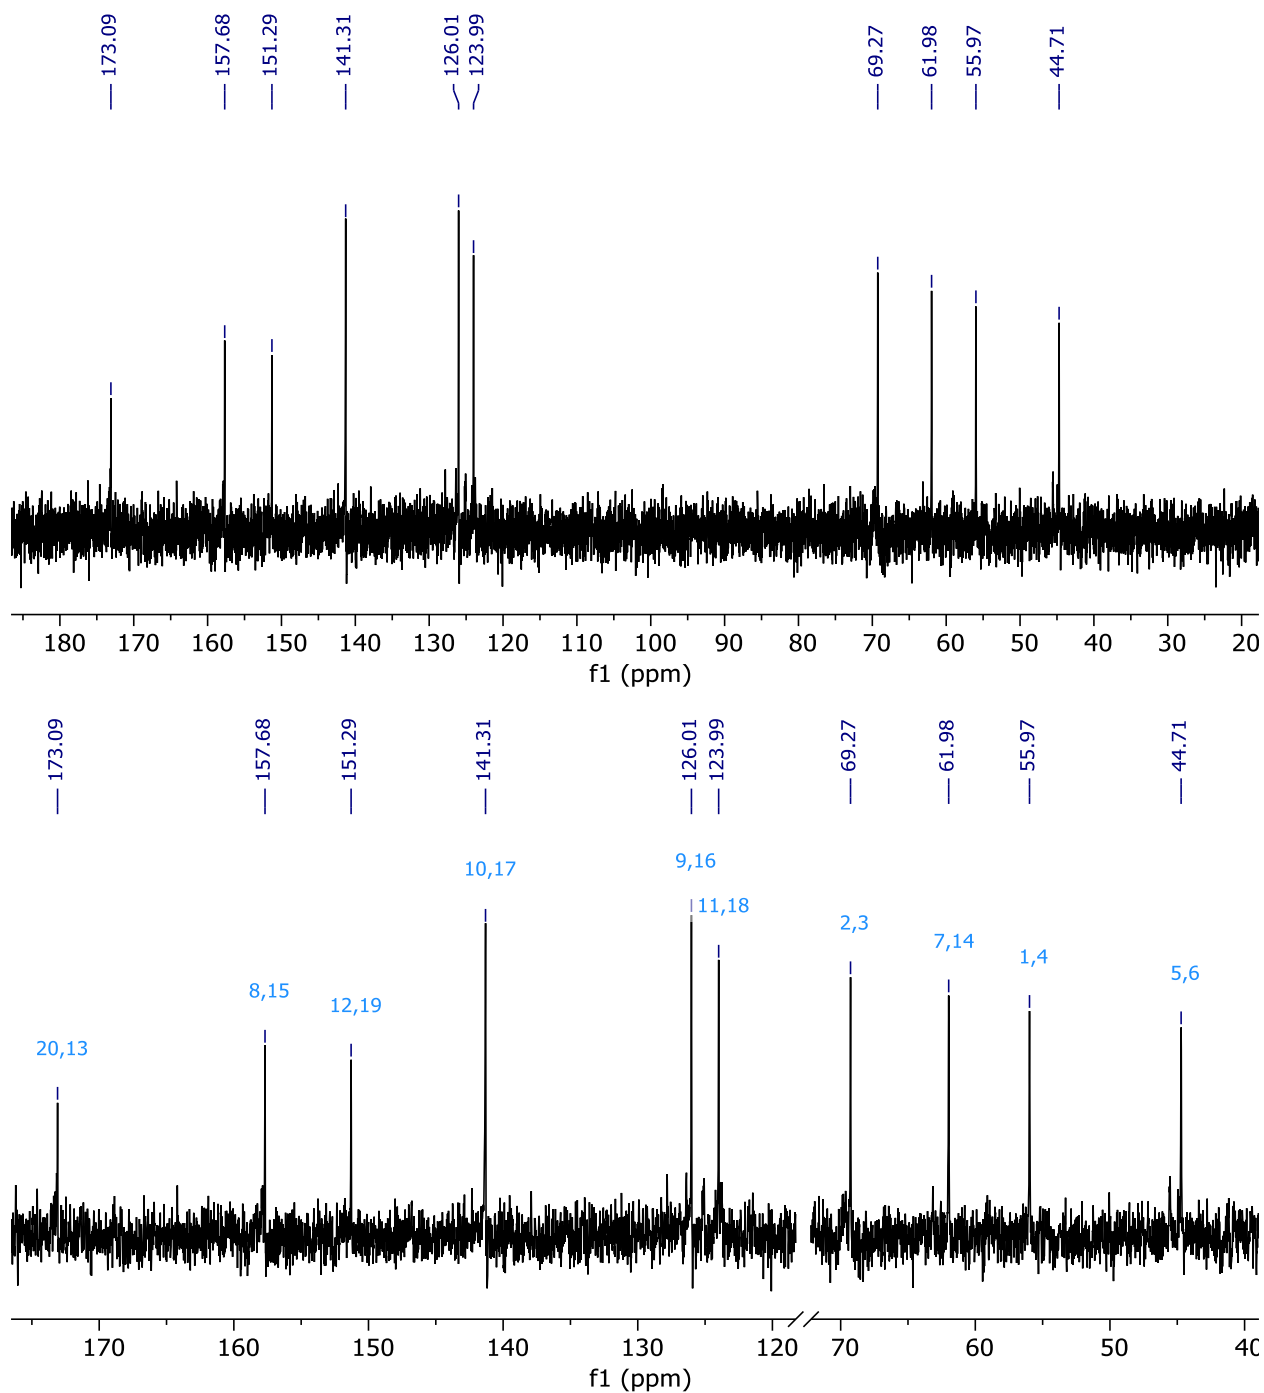

**Figure S53.** Full (top) as well as properly expanded and labeled (bottom)  $^{13}\text{C}\{^1\text{H}\}$  NMR spectrum (126 MHz,  $\text{D}_2\text{O}$ , pD = 7, 25 °C) of La-OxyMepa complex.

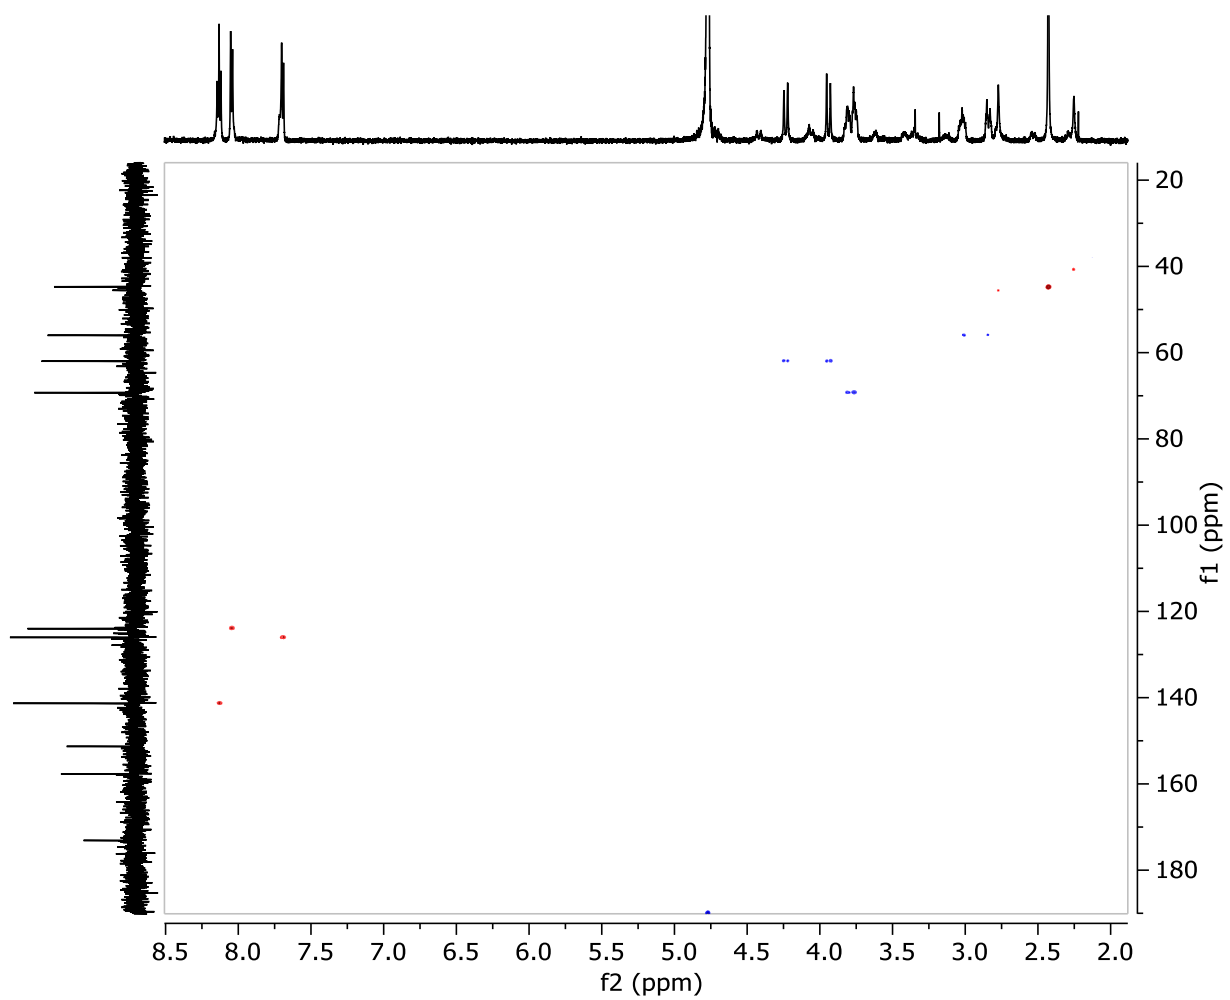

**Figure S54.** Full HSQC spectrum (600 MHz,  $\text{D}_2\text{O}$ ,  $\text{pD} = 7$ ,  $25^\circ\text{C}$ ) of La-OxyMepa complex.

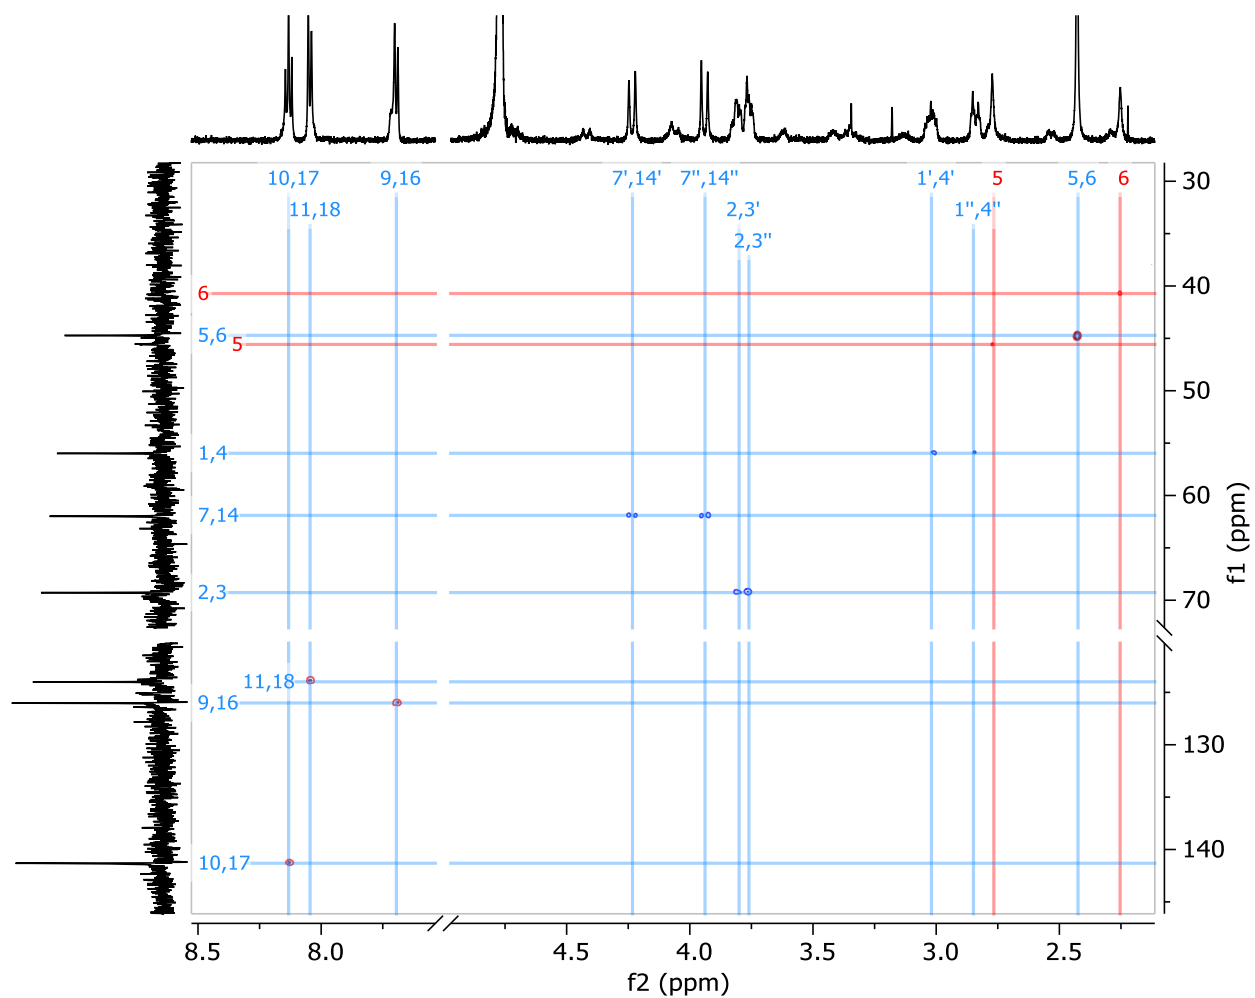

**Figure S55.** Properly expanded and labeled HSQC spectrum (600 MHz, D<sub>2</sub>O, pD = 7, 25 °C) of La-OxyMepa complex.

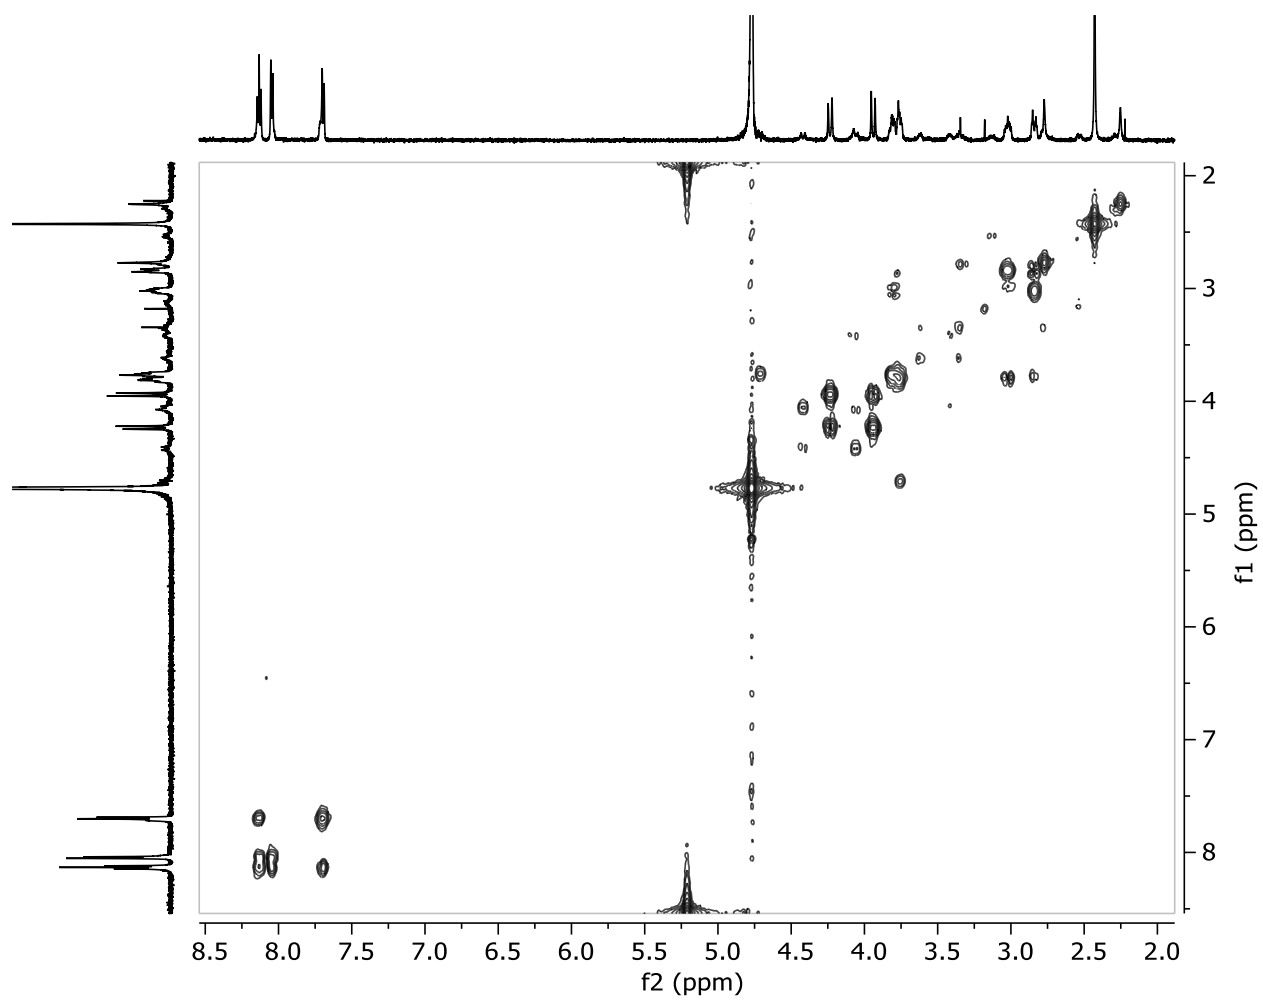

**Figure S56.** Full COSY spectrum (600 MHz, D<sub>2</sub>O, pD = 7, 25 °C) of La-OxyMepa complex.

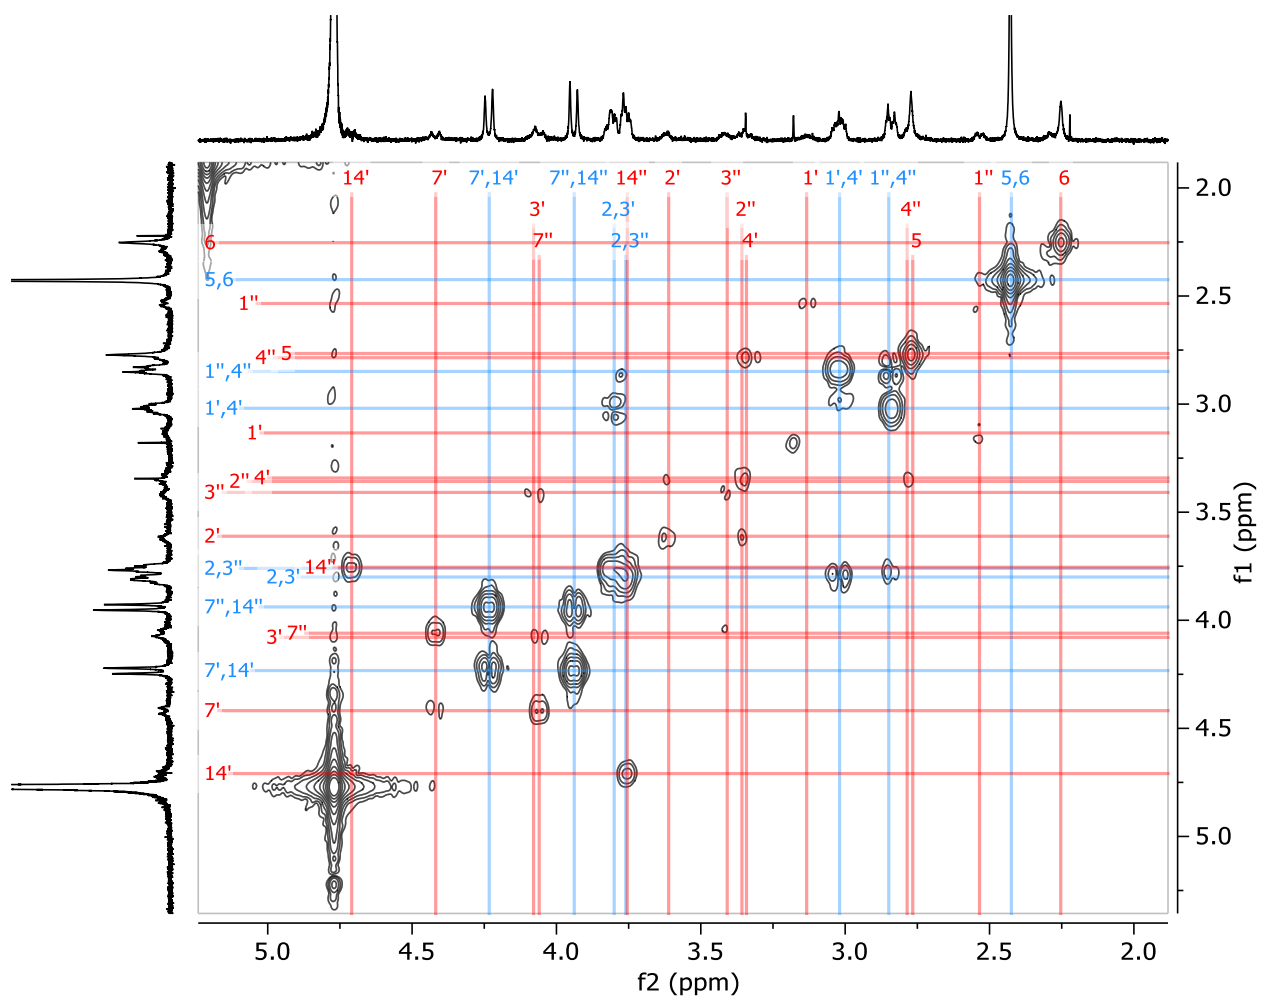

**Figure S57.** Expanded (aliphatic region) and labeled COSY spectrum (600 MHz, D<sub>2</sub>O, pD = 7, 25 °C) of La-OxyMepa complex.

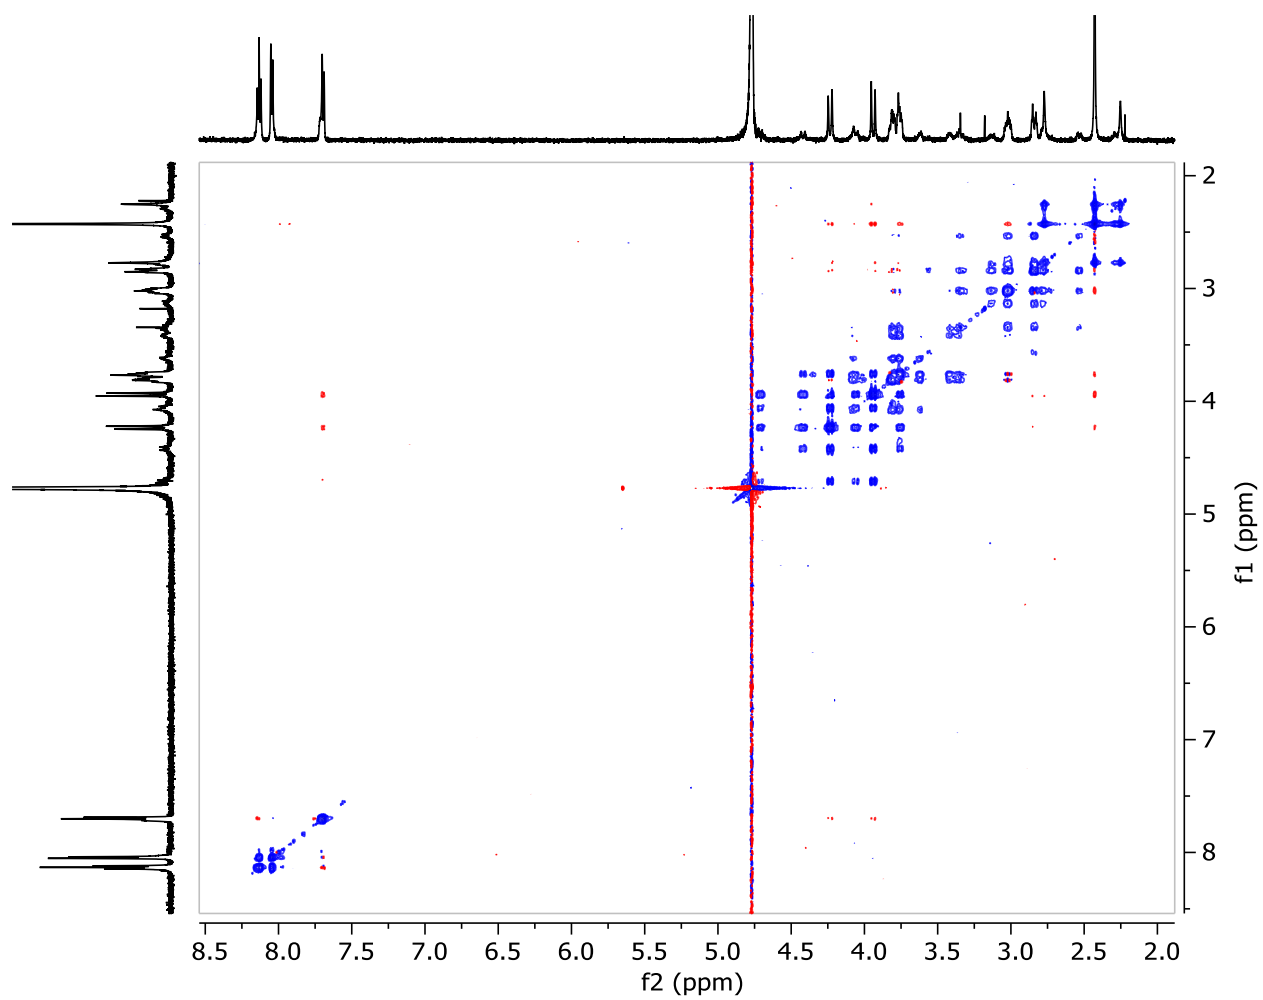

**Figure S58.** Full ROESY spectrum (600 MHz, D<sub>2</sub>O, pD = 7, 25 °C) of La-OxyMepa complex.



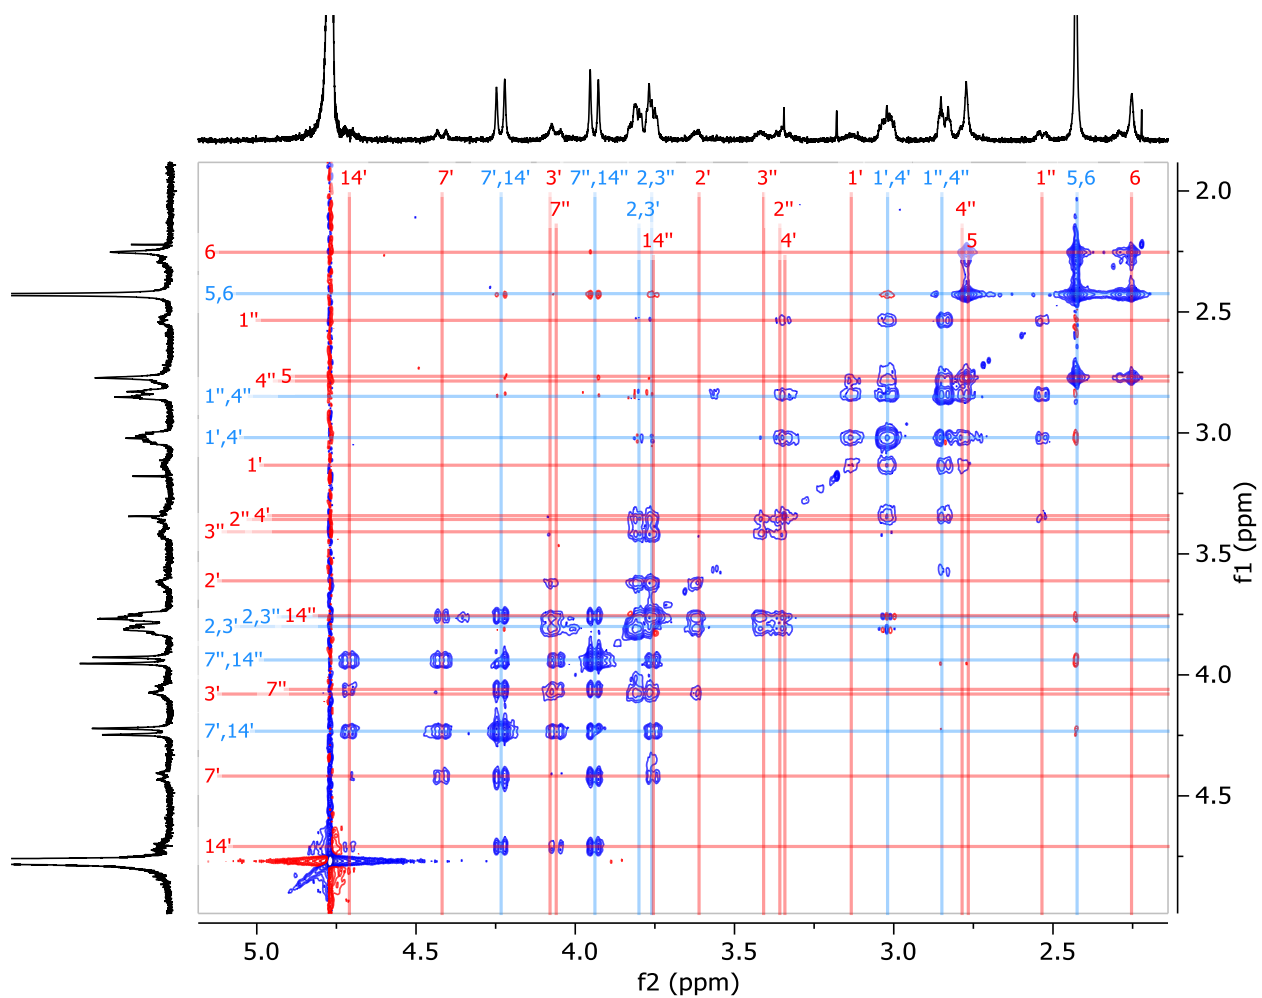

**Figure S59.** Expanded (aliphatic region) and labeled ROESY spectrum (600 MHz, D<sub>2</sub>O, pD = 7, 25 °C) of La-OxyMepa complex.

(2) Lu-OxyMepa complex

**Table S4.** Peak assignments of NMR spectra on Lu-OxyMepa complex. See Chart 2 for the numbering scheme.

| Carbon/Hydrogen<br>Number | Symmetric, <i>anti</i> - |                  | Asymmetric, <i>syn</i> - |                  |
|---------------------------|--------------------------|------------------|--------------------------|------------------|
|                           | $\delta_C$ (ppm)         | $\delta_H$ (ppm) | $\delta_C$ (ppm)         | $\delta_H$ (ppm) |
| 1                         |                          | 3.22, 2.96       | 55.62                    | 3.03, 2.55       |
| 2                         |                          | 4.27, 4.08       | 70.30                    | 4.33, 3.86       |
| 3                         |                          | 4.27, 4.08       | 72.19                    | 4.39, 4.14       |
| 4                         |                          | 3.22, 2.96       | 55.13                    | 3.79, 2.84       |
| 5                         | 45.61                    | 2.52             | 44.49                    | 2.73             |
| 6                         | 45.61                    | 2.52             | 43.07                    | 2.46             |
| 7                         |                          | 4.42, 3.98       | 63.22                    | 4.72, 4.08       |
| 8                         |                          |                  | 158.21 or 156.45         |                  |
| 9                         |                          | 7.74             | 126.76 or 126.59         | 7.79             |
| 10                        |                          | 8.16             | 142.44 or 142.16         | 8.20 or 8.17     |
| 11                        |                          | 7.98             | 123.31 or 122.92         | 7.94             |
| 12                        |                          |                  | 149.71 or 149.48         |                  |
| 13                        |                          |                  | 173.14 or 173.08         |                  |
| 14                        |                          | 4.42, 3.98       | 63.72                    | 4.99, 4.02       |
| 15                        |                          |                  | 158.21 or 156.45         |                  |
| 16                        |                          | 7.74             | 126.76 or 126.59         | 7.79             |
| 17                        |                          | 8.16             | 142.44 or 142.16         | 8.20 or 8.17     |
| 18                        |                          | 7.98             | 123.31 or 122.92         | 7.94             |
| 19                        |                          |                  | 149.71 or 149.48         |                  |
| 20                        |                          |                  | 173.14 or 173.08         |                  |

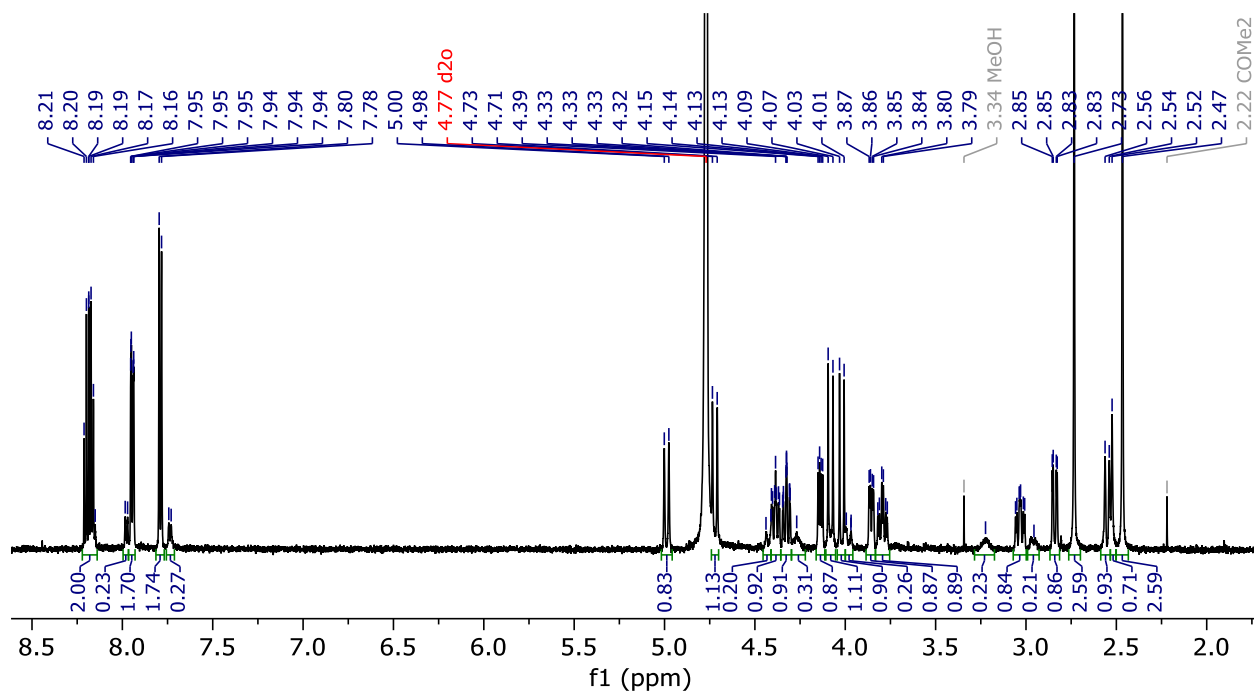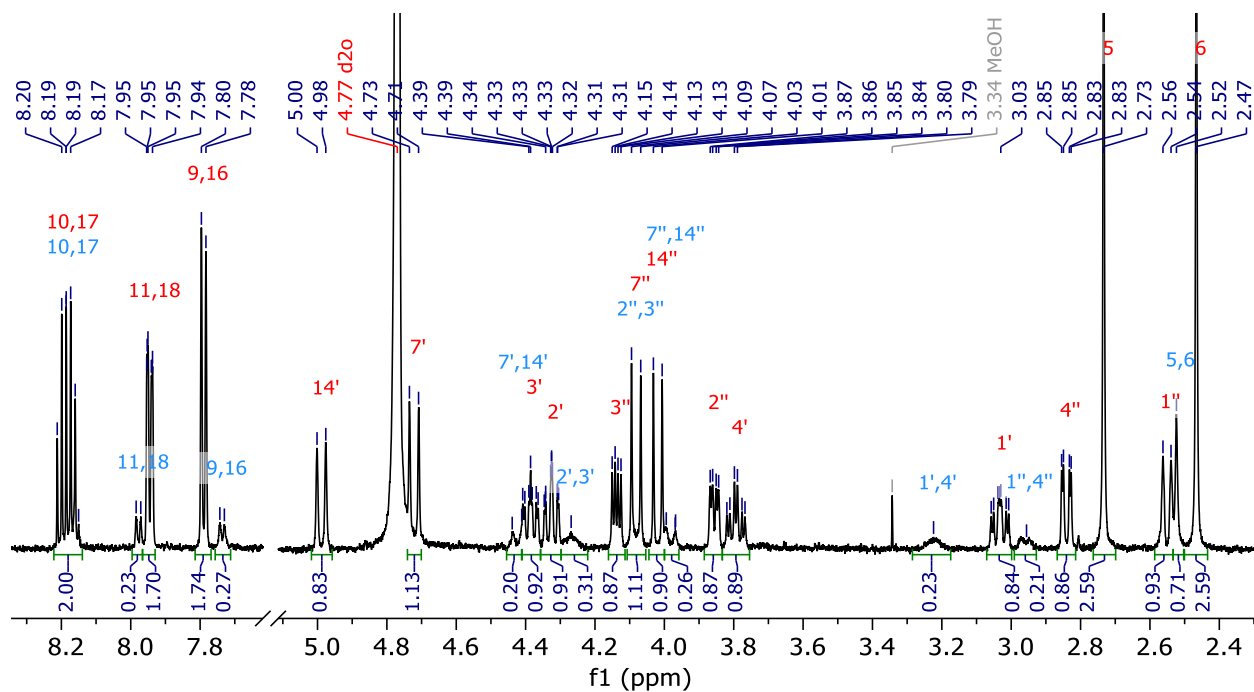

**Figure S60.** Full (top) as well as properly expanded and labeled (bottom)  $^1\text{H}$  NMR spectrum (600 MHz,  $\text{D}_2\text{O}$ , pD = 7, 25  $^\circ\text{C}$ ) of Lu-OxyMepa complex.

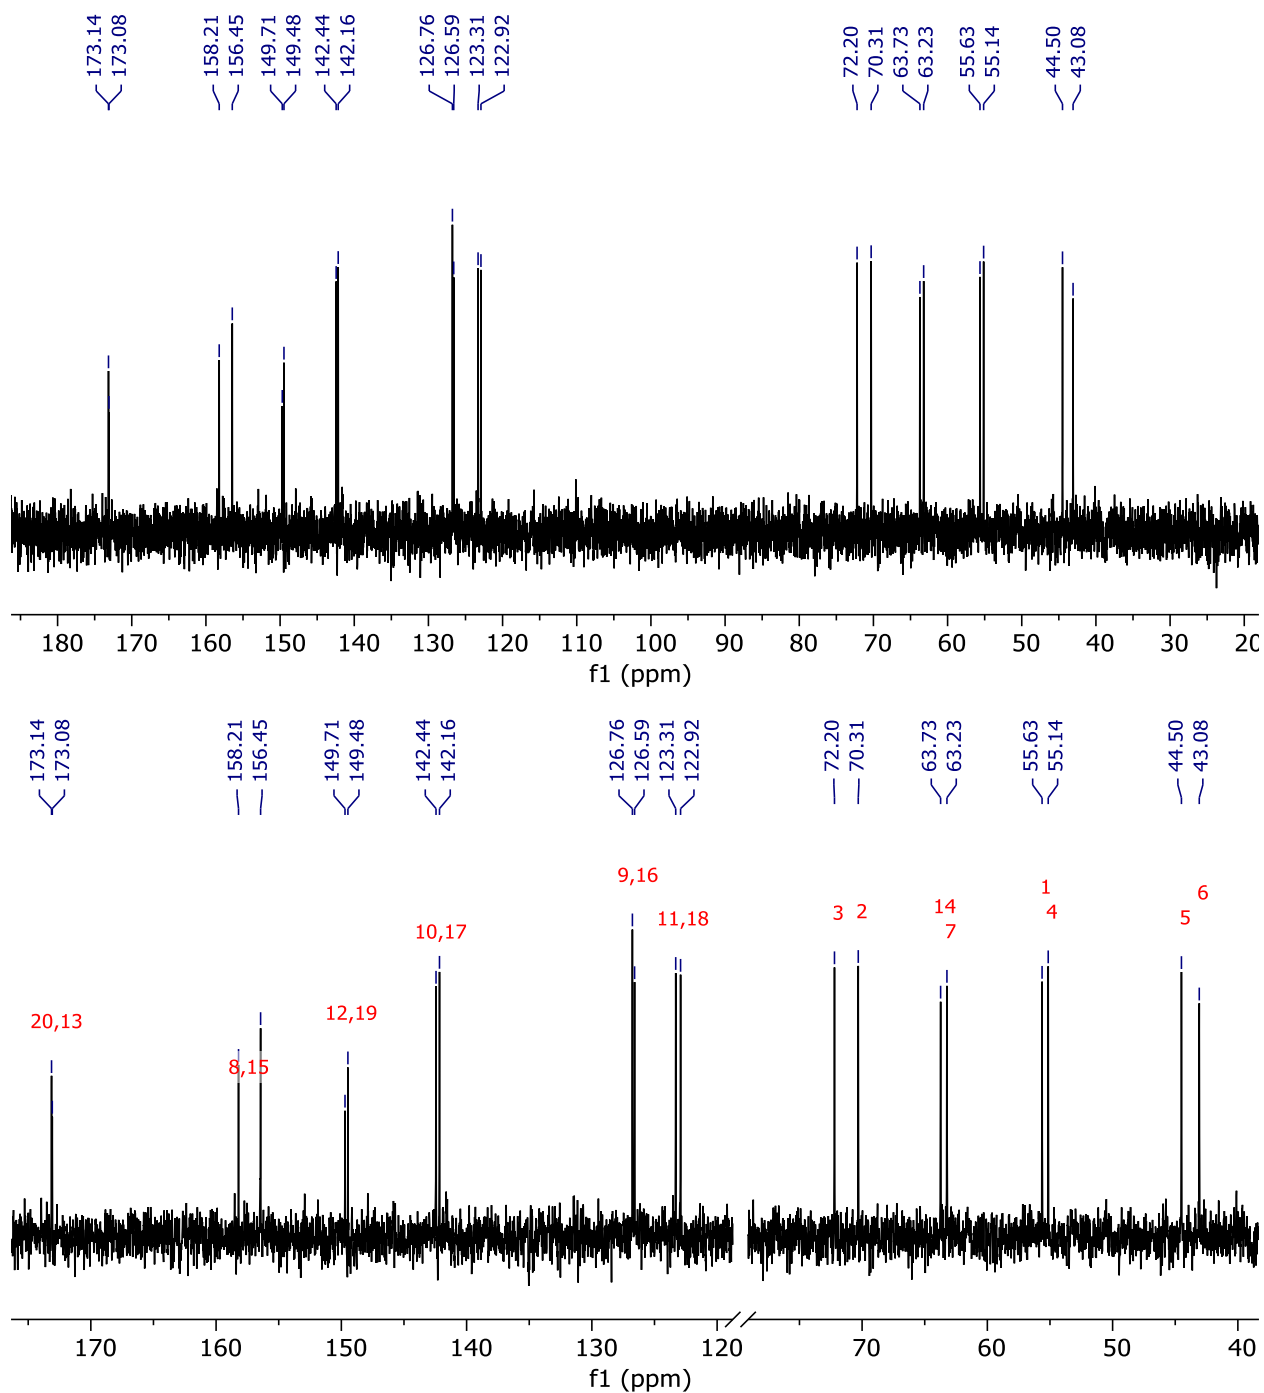

**Figure S61.** Full (top) as well as properly expanded and labeled (bottom)  $^{13}\text{C}\{^1\text{H}\}$  NMR spectrum (126 MHz,  $\text{D}_2\text{O}$ , pD = 7, 25 °C) of Lu-OxyMepa complex.

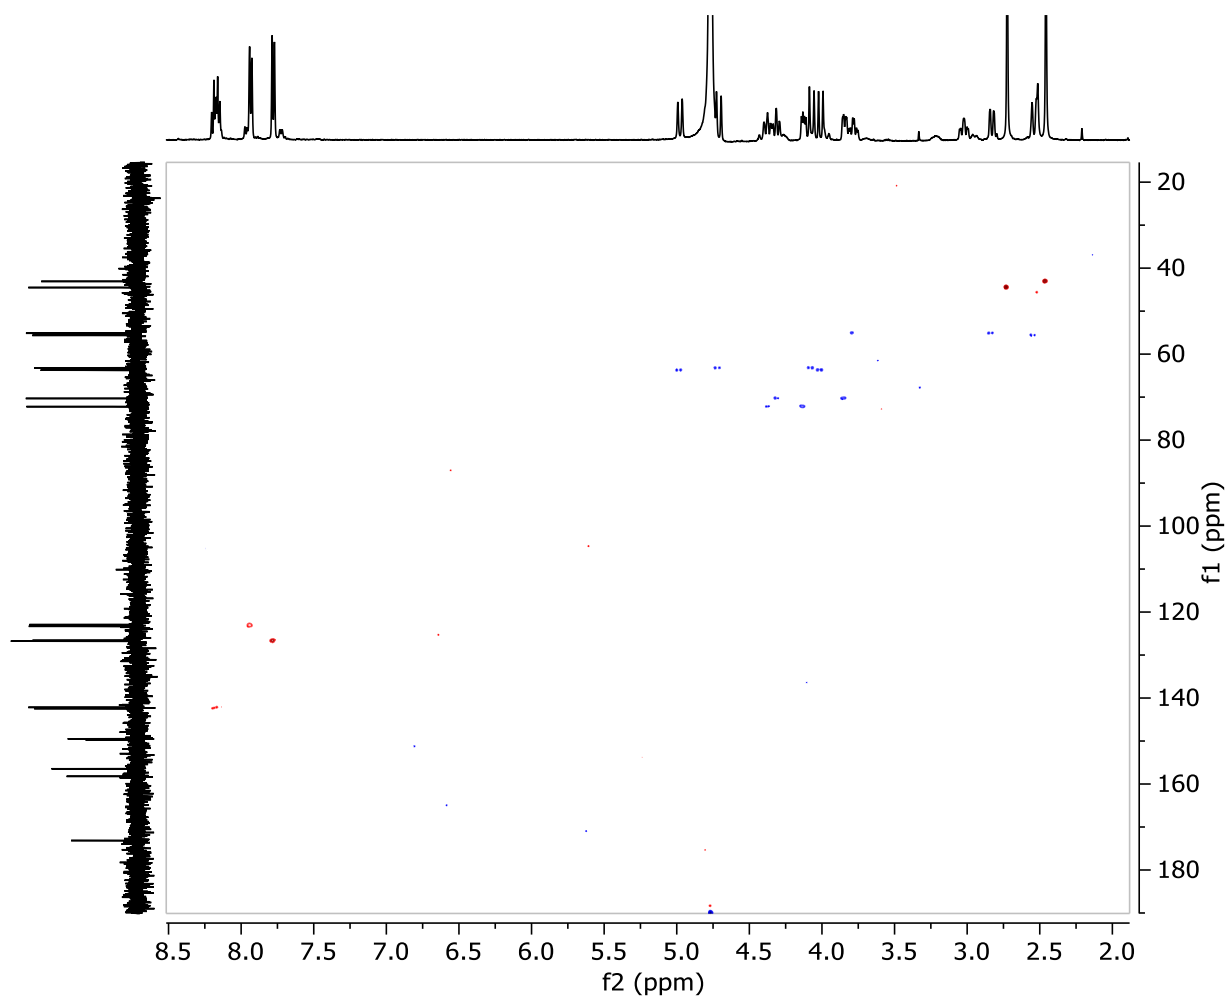

**Figure S62.** Full HSQC spectrum (600 MHz, D<sub>2</sub>O, pD = 7, 25 °C) of Lu-OxyMepa complex.

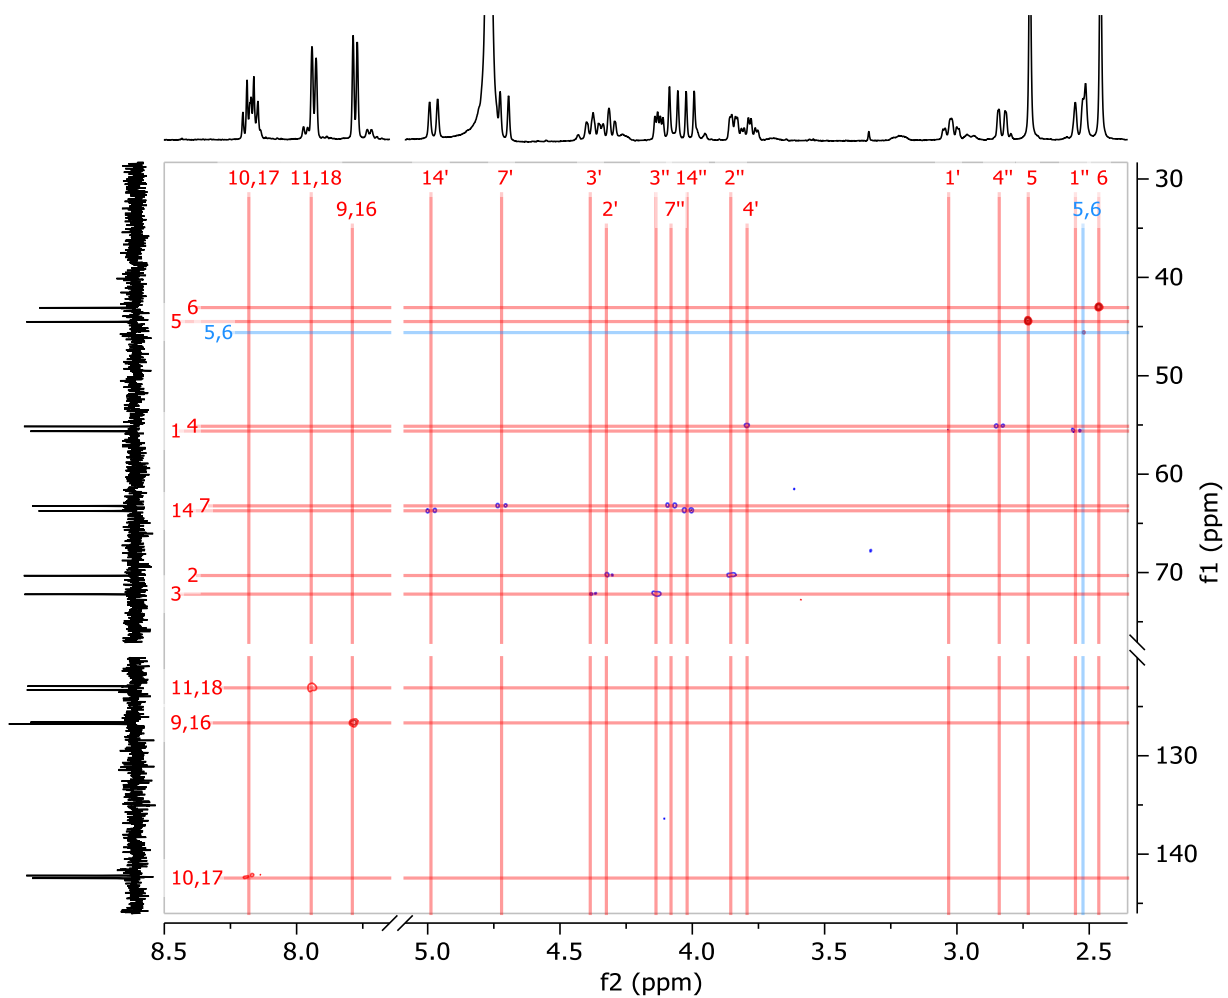

**Figure S63.** Properly expanded and labeled HSQC spectrum (600 MHz, D<sub>2</sub>O, pD = 7, 25 °C) of Lu-OxyMepa complex.

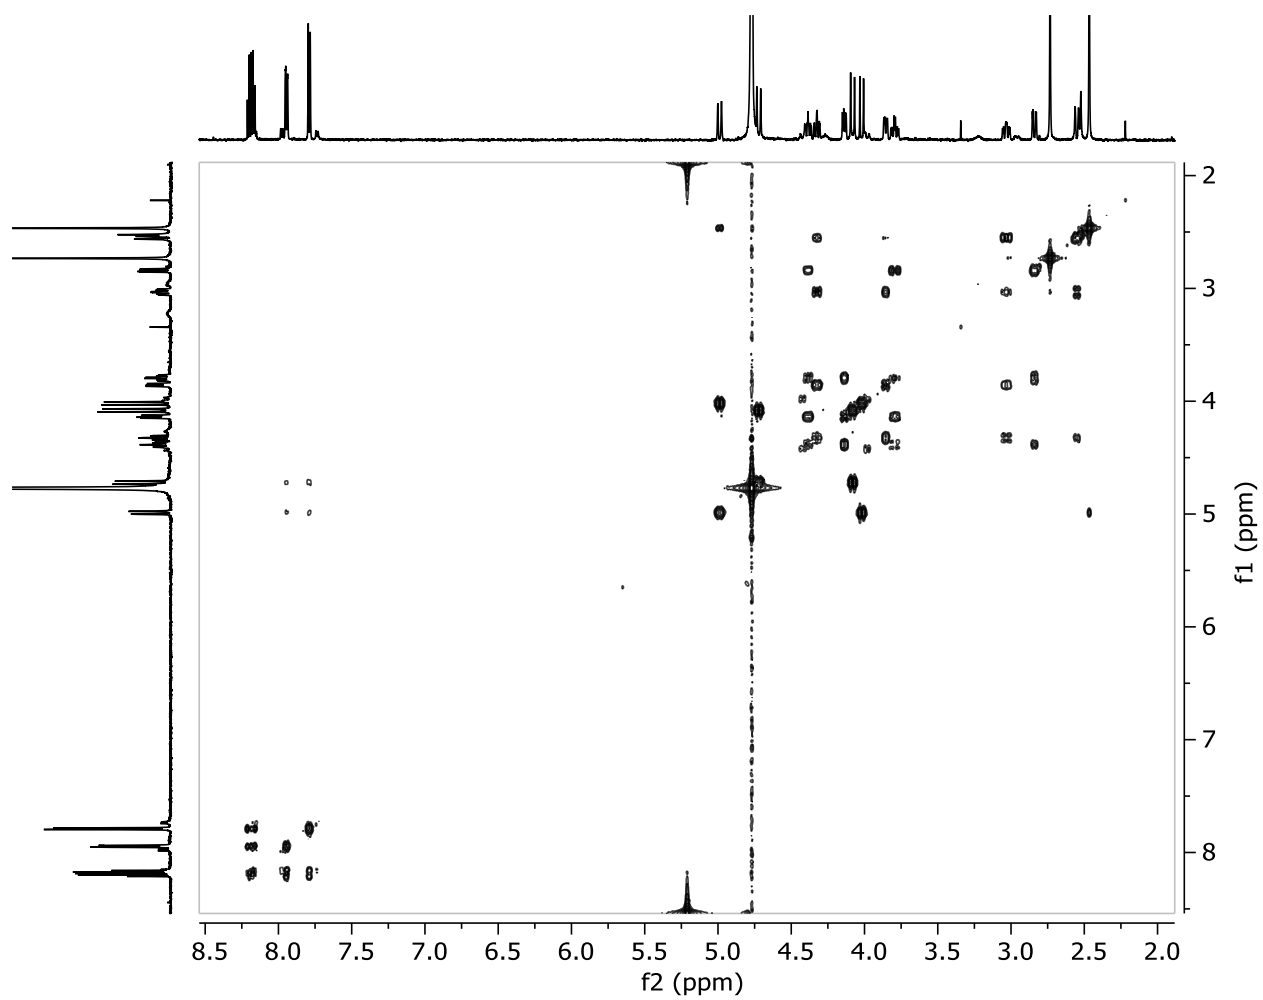

**Figure S64.** Full COSY spectrum (600 MHz, D<sub>2</sub>O, pD = 7, 25 °C) of Lu-OxyMepa complex.

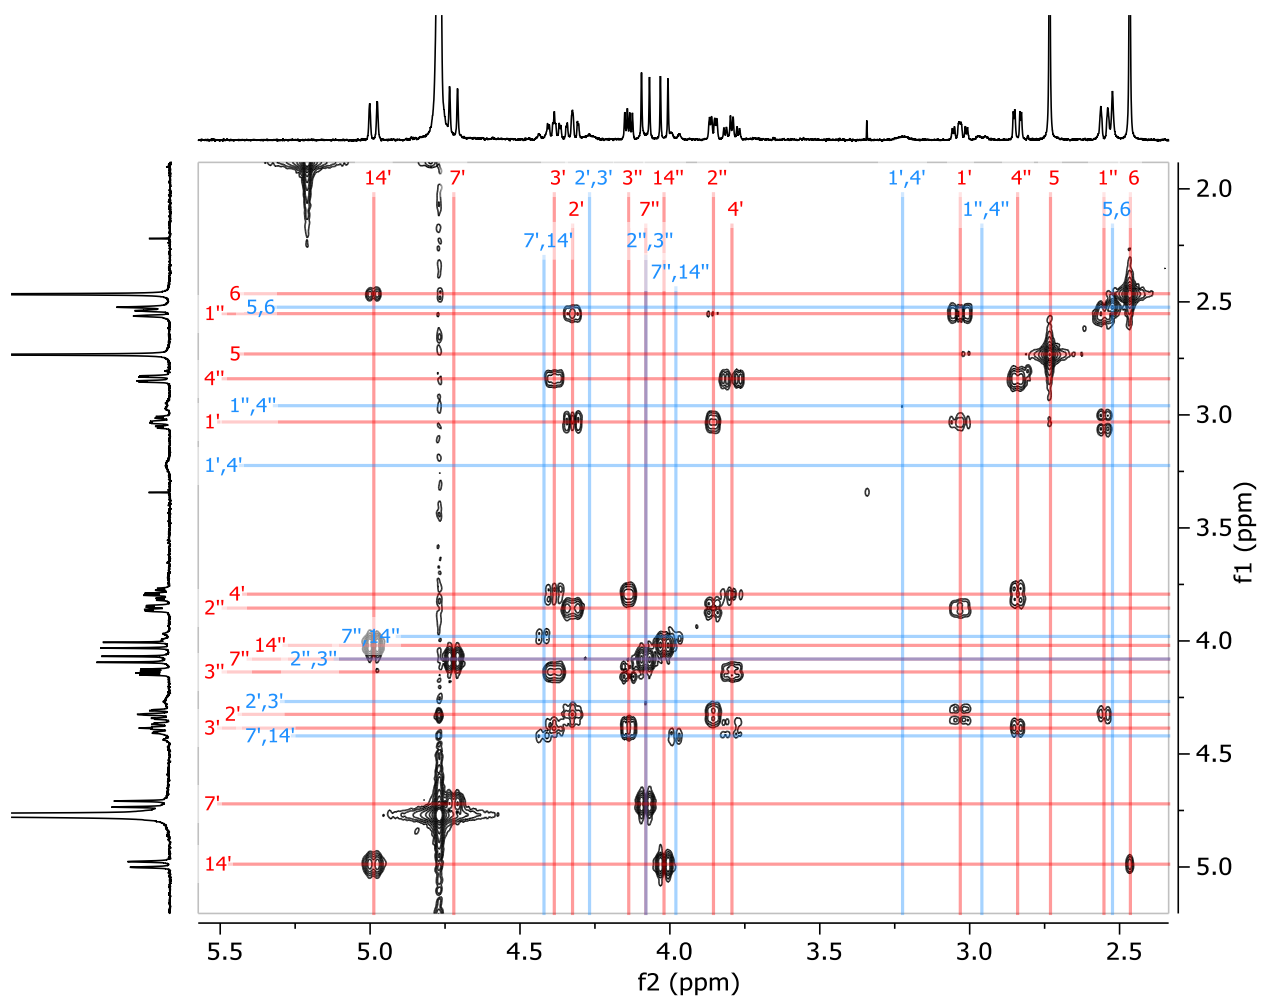

**Figure S65.** Expanded (aliphatic region) and labeled COSY spectrum (600 MHz, D<sub>2</sub>O, pD = 7, 25 °C) of Lu-OxyMepa complex.



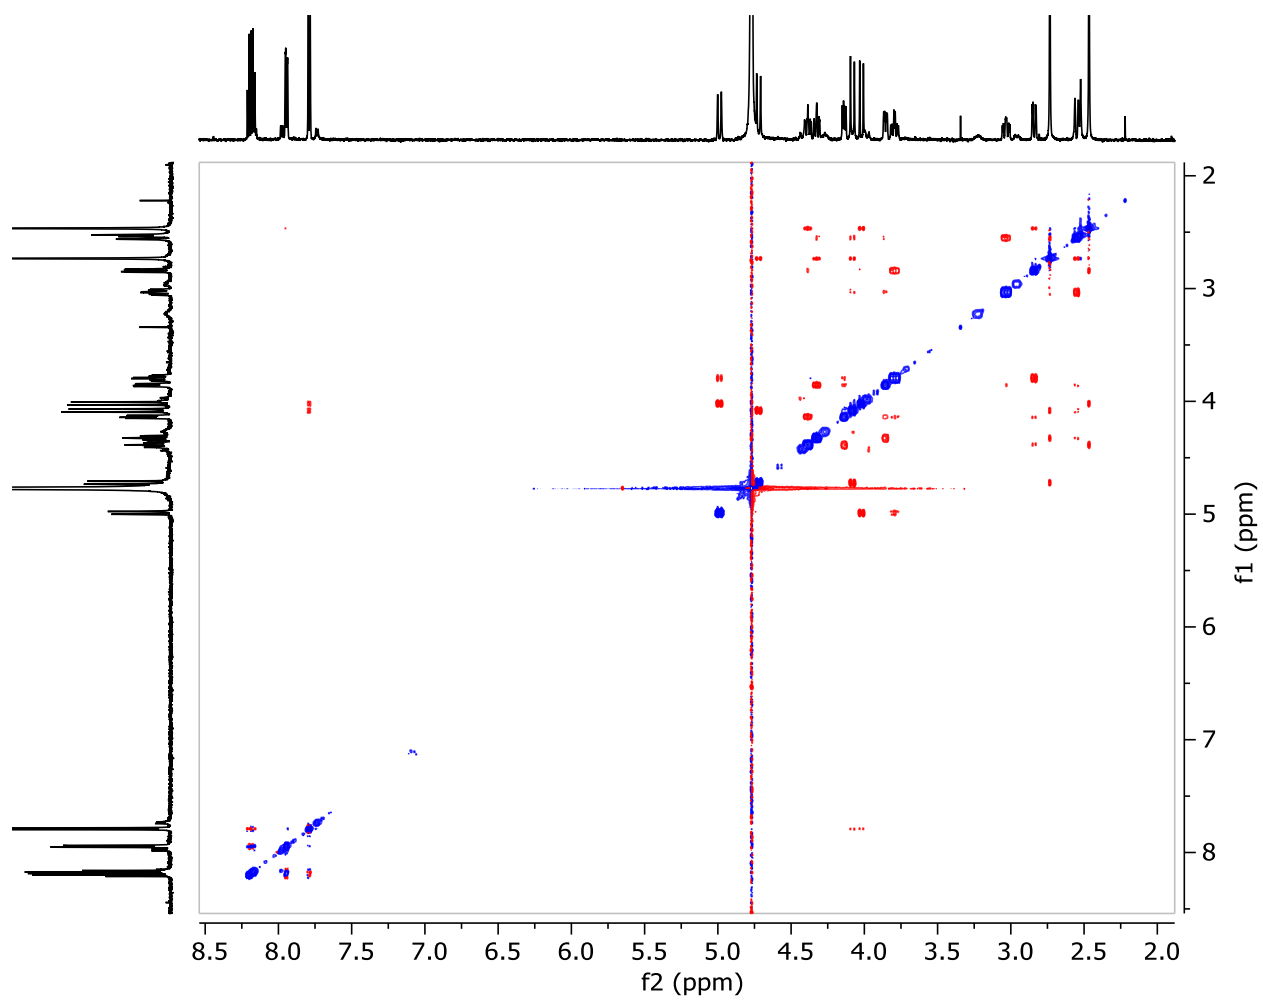

**Figure S66.** Full ROESY spectrum (600 MHz, D<sub>2</sub>O, pD = 7, 25 °C) of Lu-OxyMepa complex.

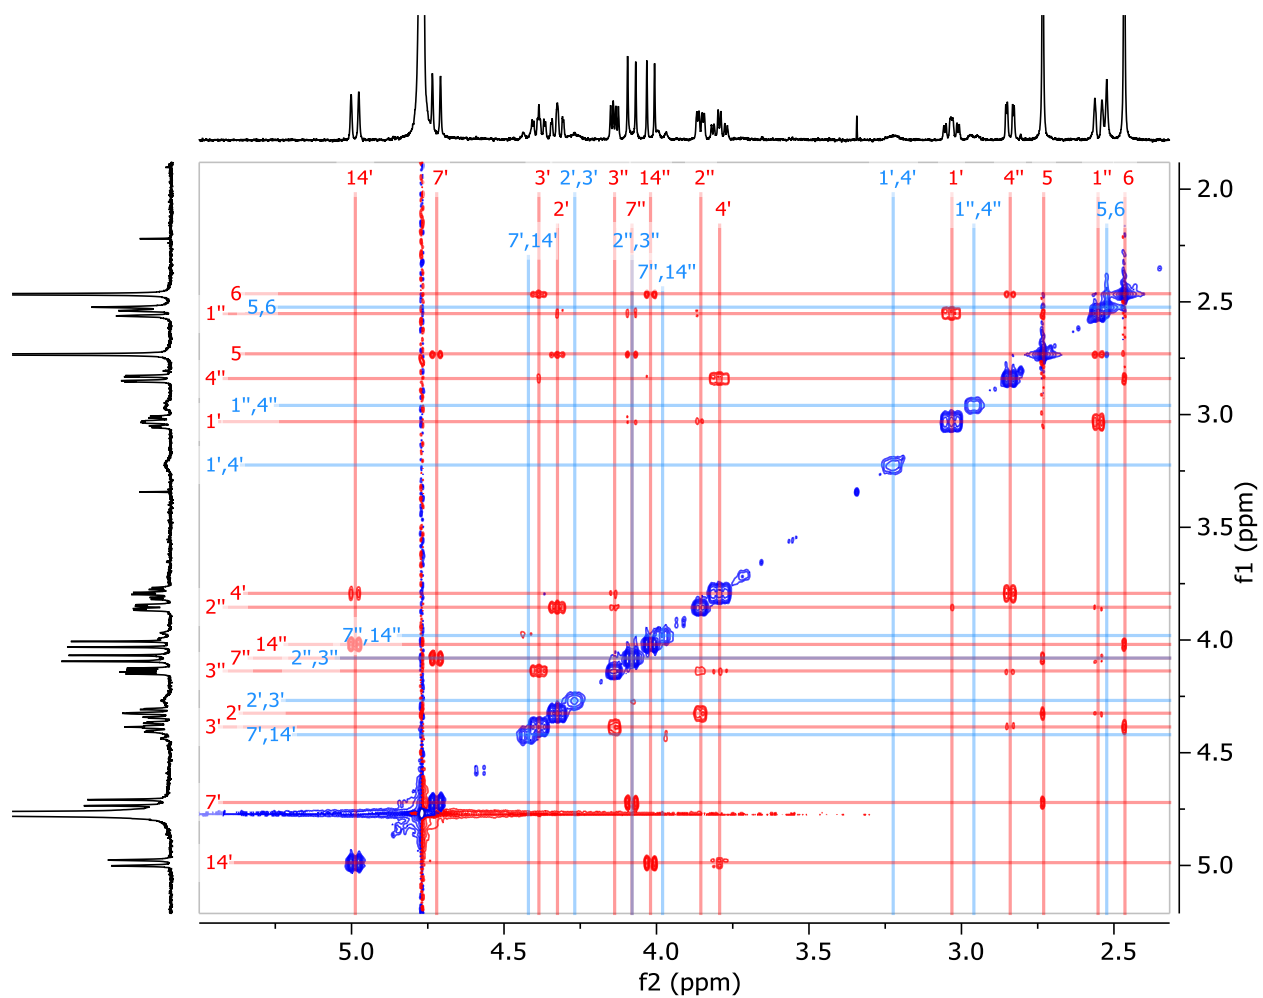

**Figure S67.** Expanded (aliphatic region) and labeled ROESY spectrum (600 MHz, D<sub>2</sub>O, pD = 7, 25 °C) of Lu-OxyMepa complex.

**Table S5.** Diagnostic ROESY (Lu-OxyMepa) interactions that verify the asymmetric conformation belongs to *syn*- conformer. The atomic distances are taken from the Lu-OxyMepa crystal structure.

| Hydrogen Pairs | Atomic Distance (Å)      | Interaction Intensity |
|----------------|--------------------------|-----------------------|
| H1A–H7A        | 3.534                    |                       |
| H1A–H7B        | 2.494                    | medium                |
| H1B–H7A        | 3.420                    |                       |
| H1B–H7B        | 2.609                    | medium                |
| H4A–H14A       | 2.739                    |                       |
| H4A–H14B       | 2.676                    | weak                  |
| H4B–H14A       | 2.260                    | strong                |
| H4B–H14B       | 3.067                    |                       |
| H2A–H5         | 3.054/2.272 <sup>a</sup> | very strong           |
| H2B–H5         | 4.212/3.634 <sup>a</sup> |                       |
| H3A–H6         | 4.125/3.546 <sup>a</sup> |                       |
| H3B–H6         | 2.905/2.167 <sup>a</sup> | very strong           |

<sup>a</sup>For hydrogen pairs involving methyl groups, the atomic distance is listed as (averaged distance considering 3 hydrogens on the methyl group)/(shortest distance among the 3 hydrogens on the methyl group).

(3) La-Oxyaapa complex

**Table S6.** Peak assignments of NMR spectra on La-Oxyaapa complex. See Chart 2 for the numbering scheme.

| Carbon/Hydrogen<br>Number | Asymmetric, <i>syn</i> - |                  |
|---------------------------|--------------------------|------------------|
|                           | $\delta_C$ (ppm)         | $\delta_H$ (ppm) |
| 1                         | 53.45                    | 2.78, 2.75       |
| 2                         | 68.99                    | 3.92, 3.49       |
| 3                         | 69.71                    | 3.84, 3.68       |
| 4                         | 57.79                    | 3.28, 2.89       |
| 5                         | 59.38                    | 4.01, 3.36       |
| 6                         | 180.22                   |                  |
| 7                         | 61.30                    | 3.55, 3.32       |
| 8                         | 180.22                   |                  |
| 9                         | 61.21                    | 4.44, 3.94       |
| 10                        | 157.35                   |                  |
| 11                        | 124.71                   | 7.64             |
| 12                        | 140.90                   | 8.09             |
| 13                        | 123.57                   | 7.93             |
| 14                        | 150.94                   |                  |
| 15                        | 173.03                   |                  |
| 16                        | 62.68                    | 4.57, 4.06       |
| 17                        | 156.61                   |                  |
| 18                        | 125.59                   | 7.62             |
| 19                        | 140.19                   | 8.04             |
| 20                        | 123.18                   | 7.94             |
| 21                        | 150.81                   |                  |
| 22                        | 172.53                   |                  |

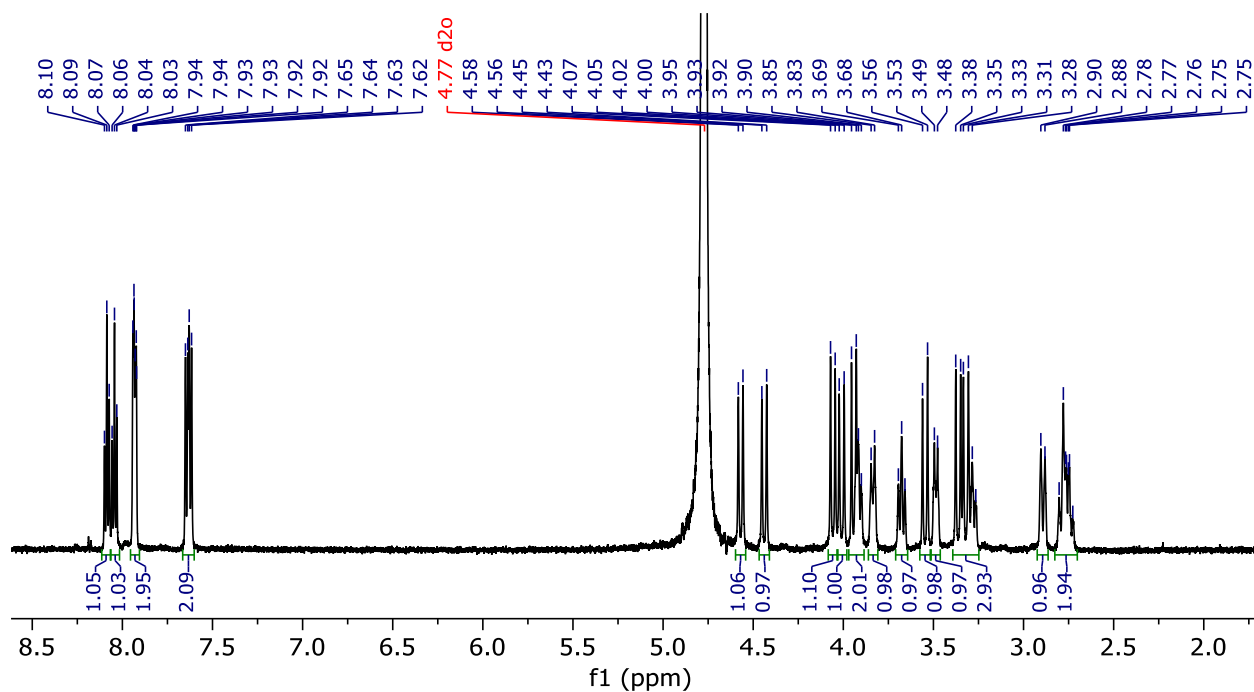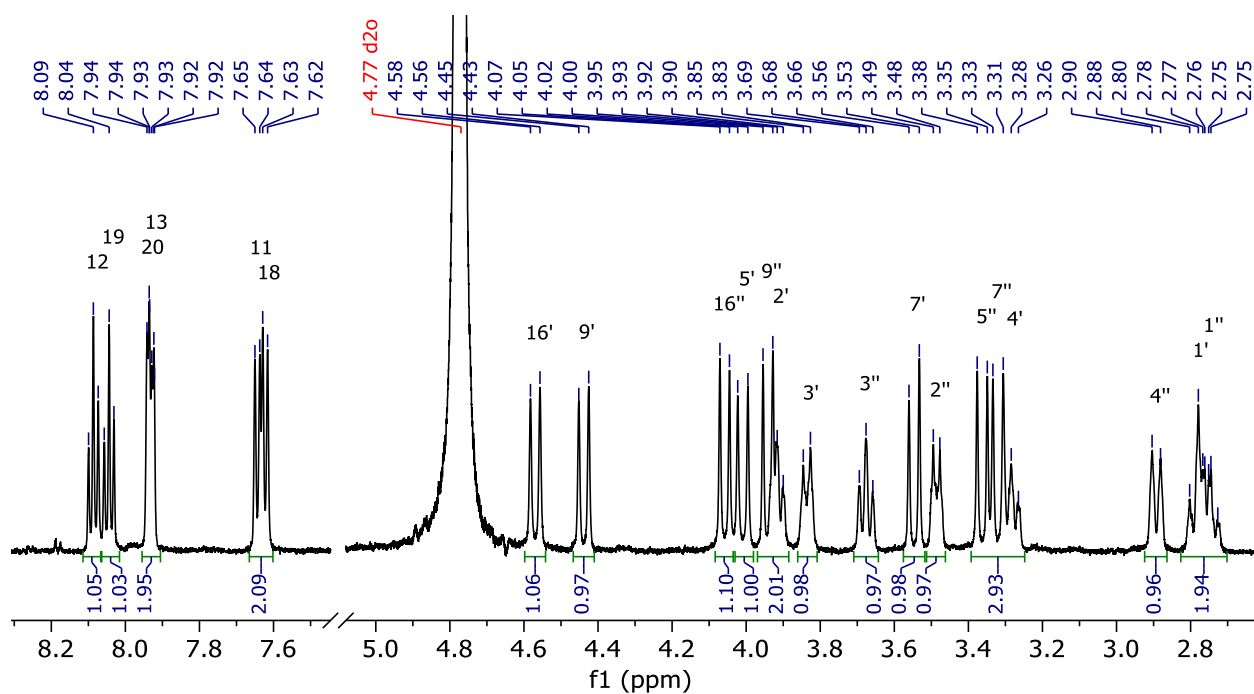

**Figure S68.** Full (top) as well as properly expanded and labeled (bottom)  $^1\text{H}$  NMR spectrum (600 MHz,  $\text{D}_2\text{O}$ ,  $\text{pD} = 7$ ,  $25^\circ\text{C}$ ) of La-Oxyaapa complex.

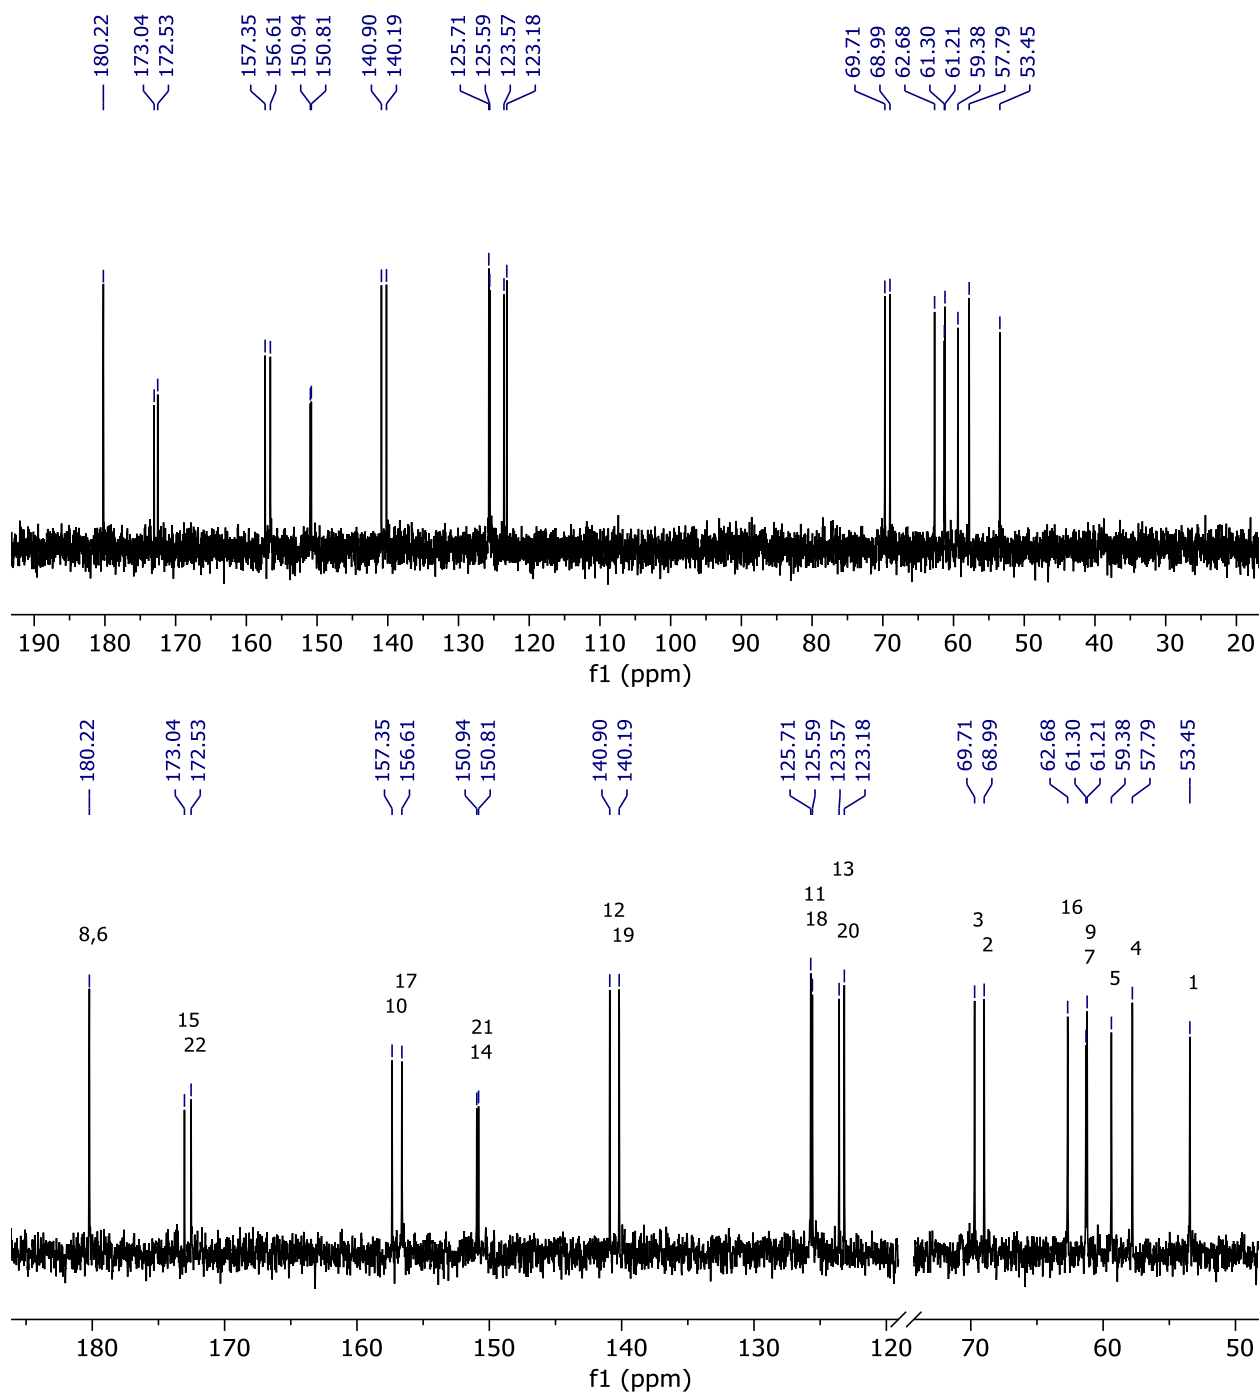

**Figure S69.** Full (top) as well as properly expanded and labeled (bottom)  $^{13}\text{C}\{^1\text{H}\}$  NMR spectrum (126 MHz,  $\text{D}_2\text{O}$ , pD = 7, 25 °C) of La-Oxyaapa complex.

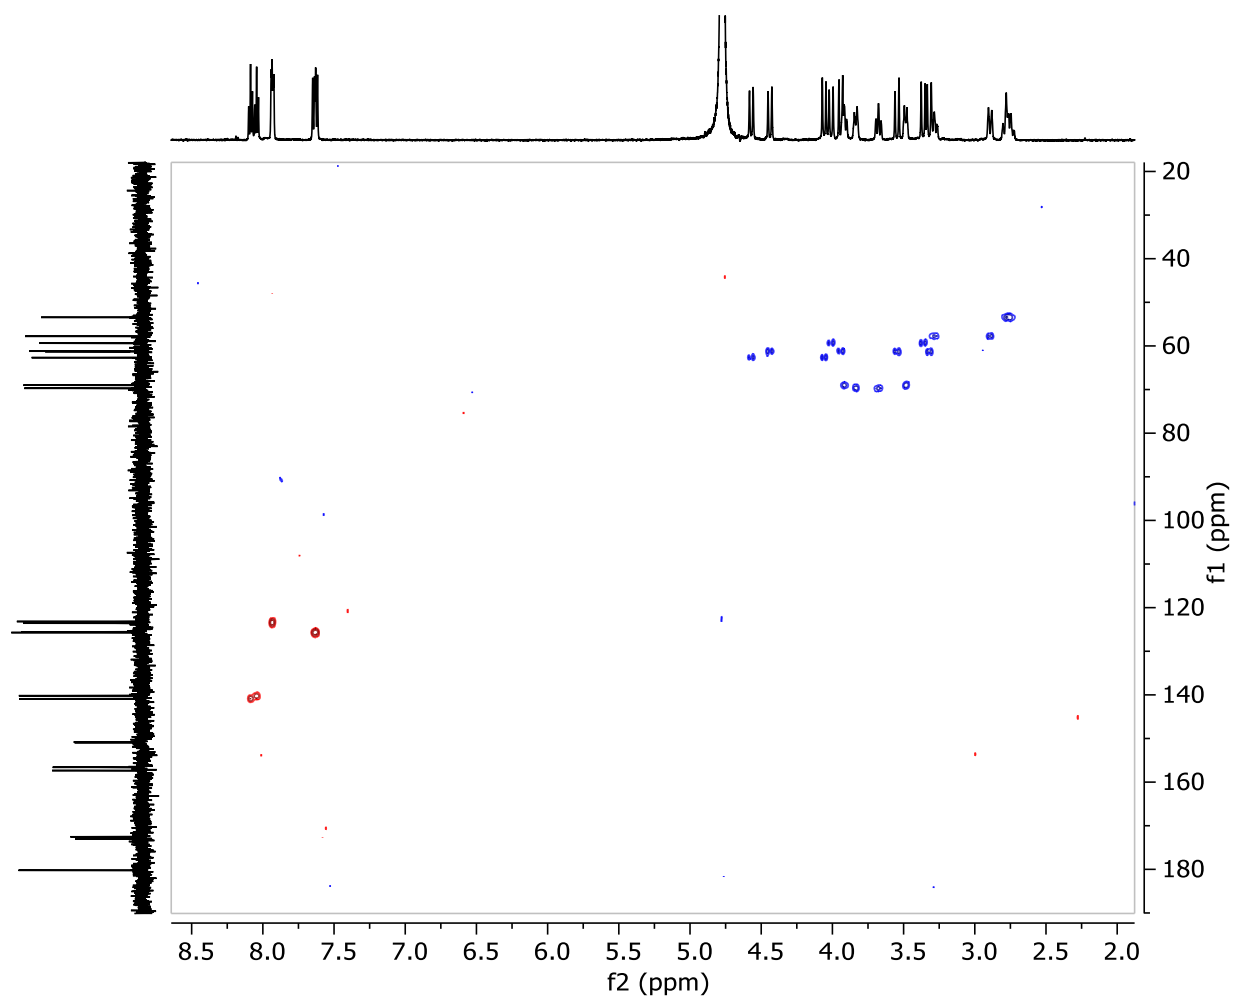

**Figure S70.** Full HSQC spectrum (600 MHz,  $\text{D}_2\text{O}$ ,  $\text{pD} = 7$ ,  $25\text{ }^\circ\text{C}$ ) of La-Oxyaapa complex.

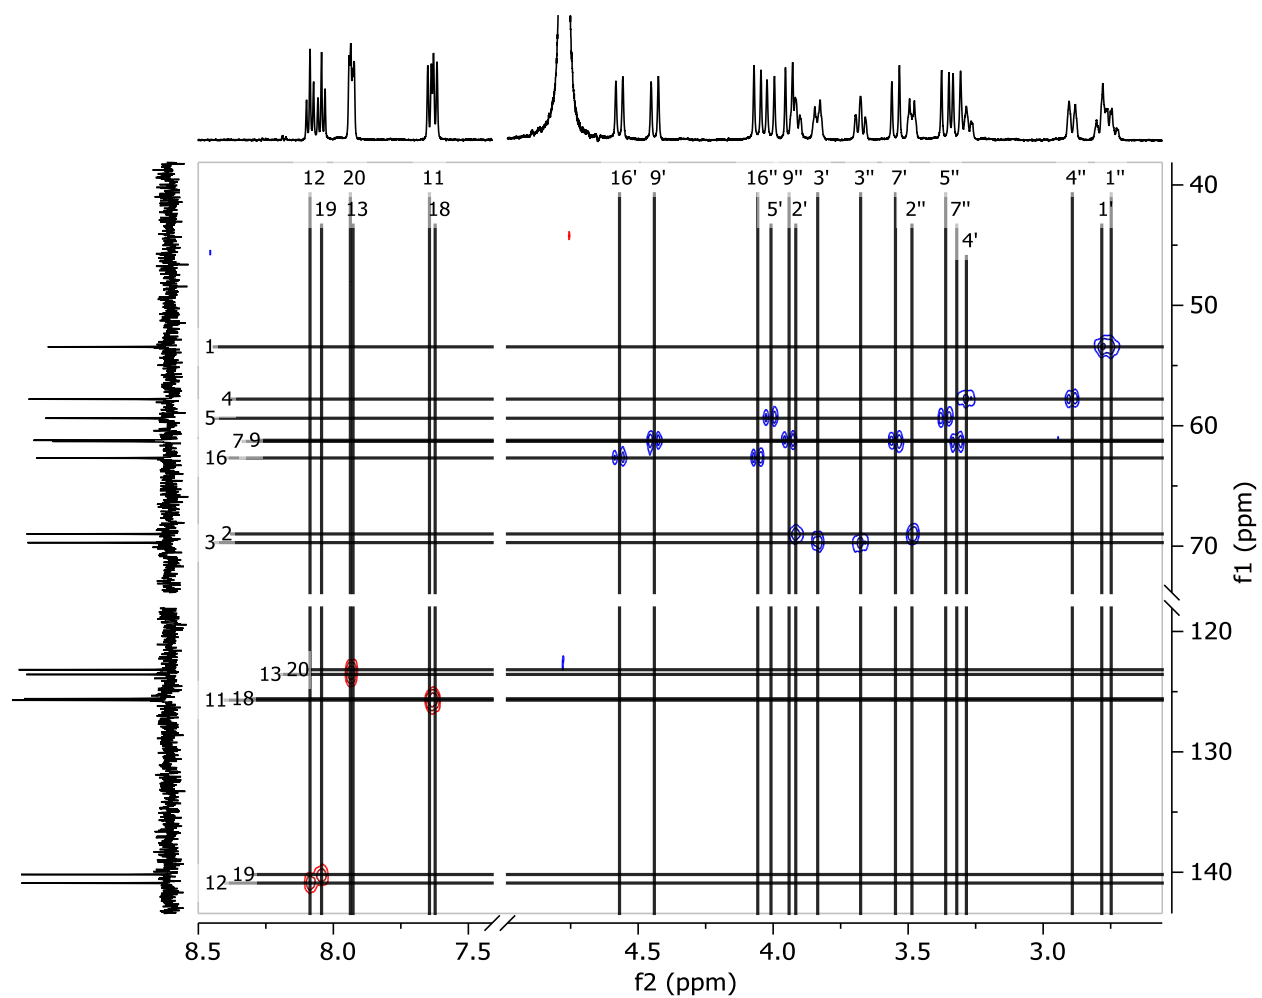

**Figure S71.** Properly expanded and labeled HSQC spectrum (600 MHz, D<sub>2</sub>O, pD = 7, 25 °C) of La-Oxyaapa complex.



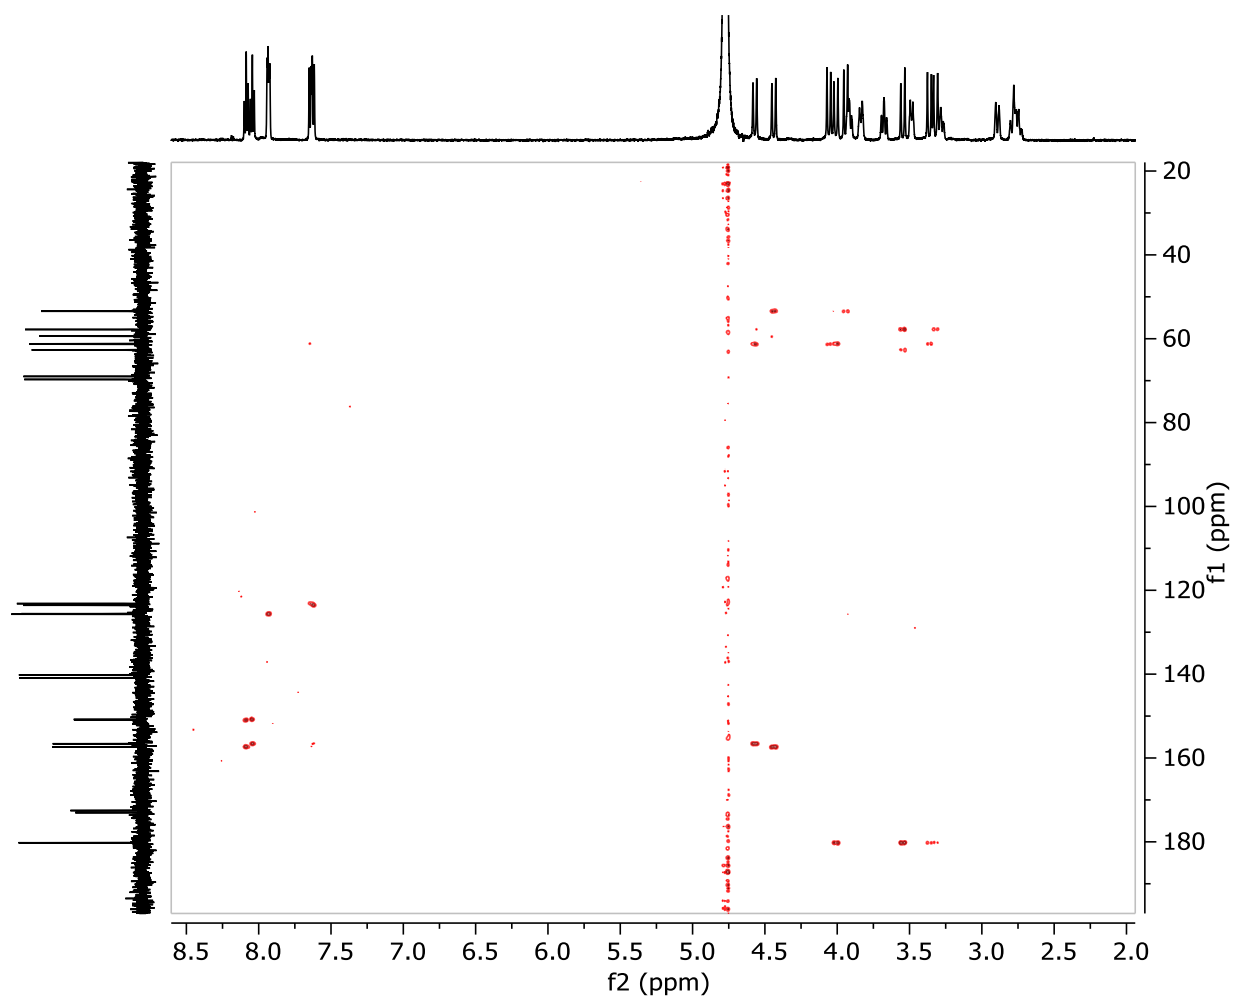

**Figure S72.** Full HMBC spectrum (600 MHz, D<sub>2</sub>O, pD = 7, 25 °C) of La-Oxyaapa complex.

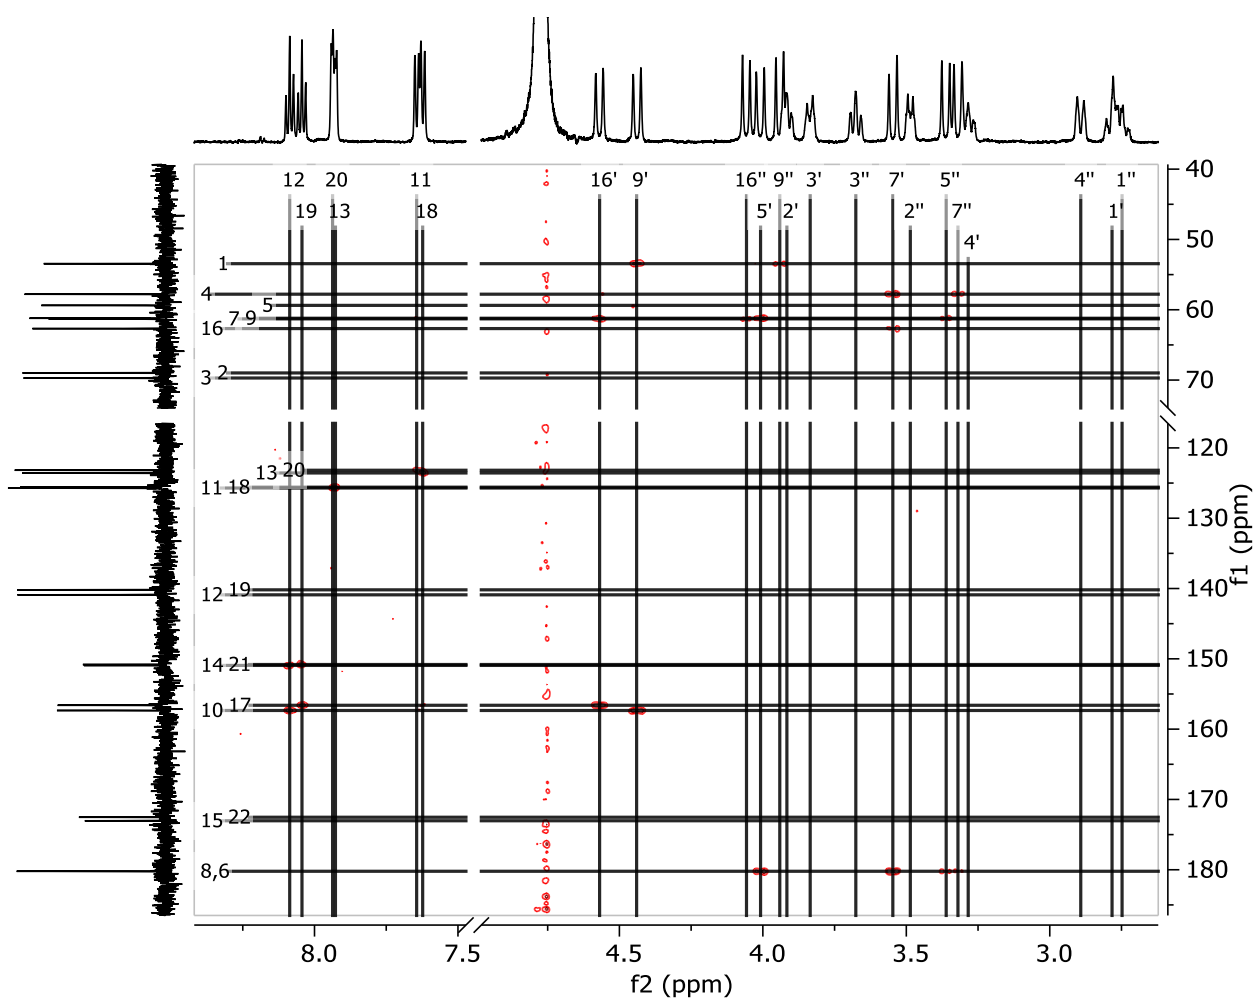

**Figure S73.** Properly expanded and labeled HMBC spectrum (600 MHz, D<sub>2</sub>O, pD = 7, 25 °C) of La-Oxyaapa complex.

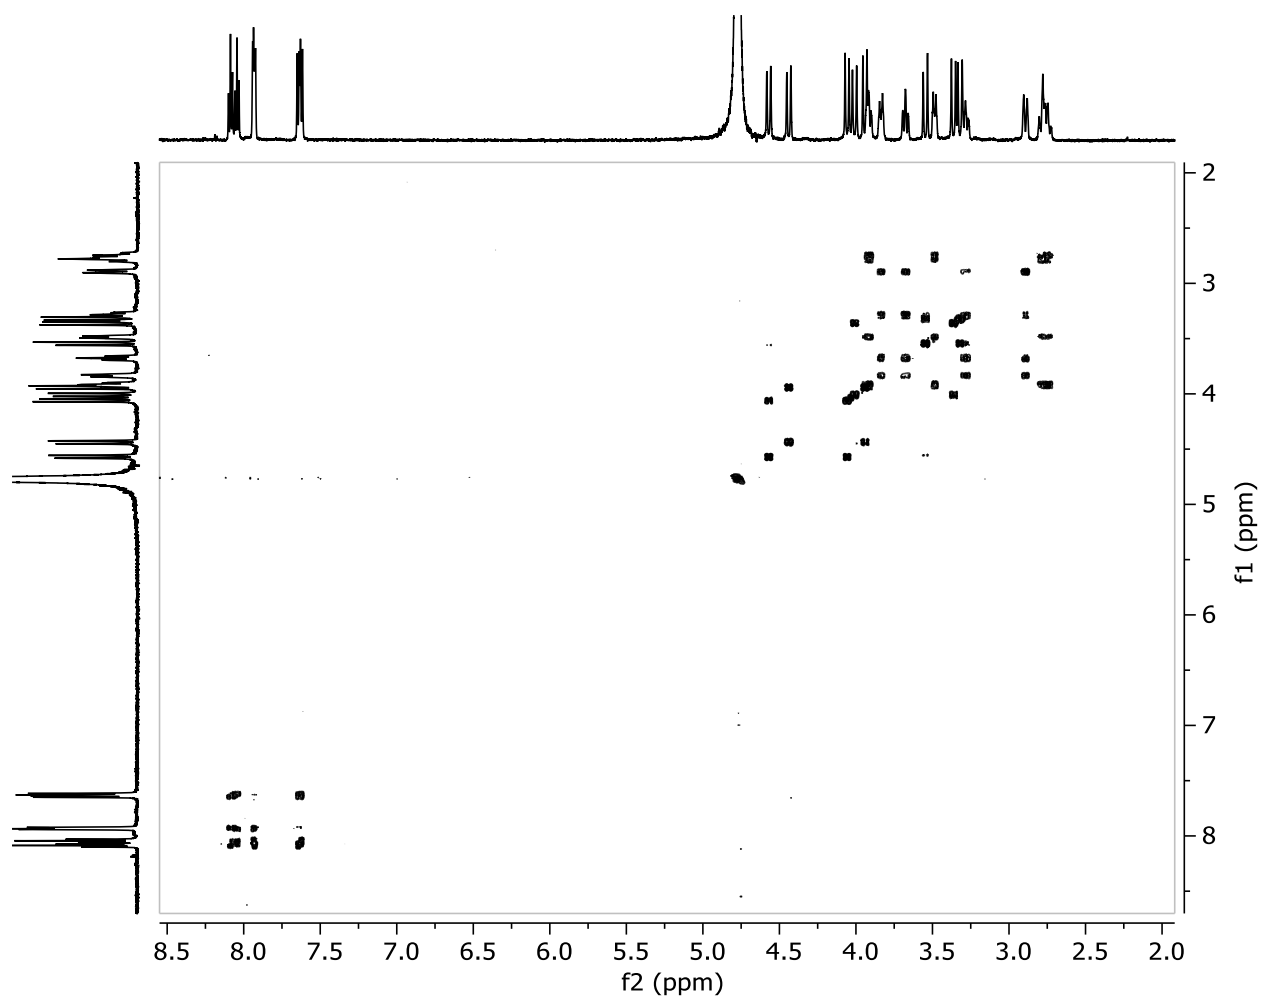

**Figure S74.** Full COSY spectrum (600 MHz, D<sub>2</sub>O, pD = 7, 25 °C) of La-Oxyaapa complex.

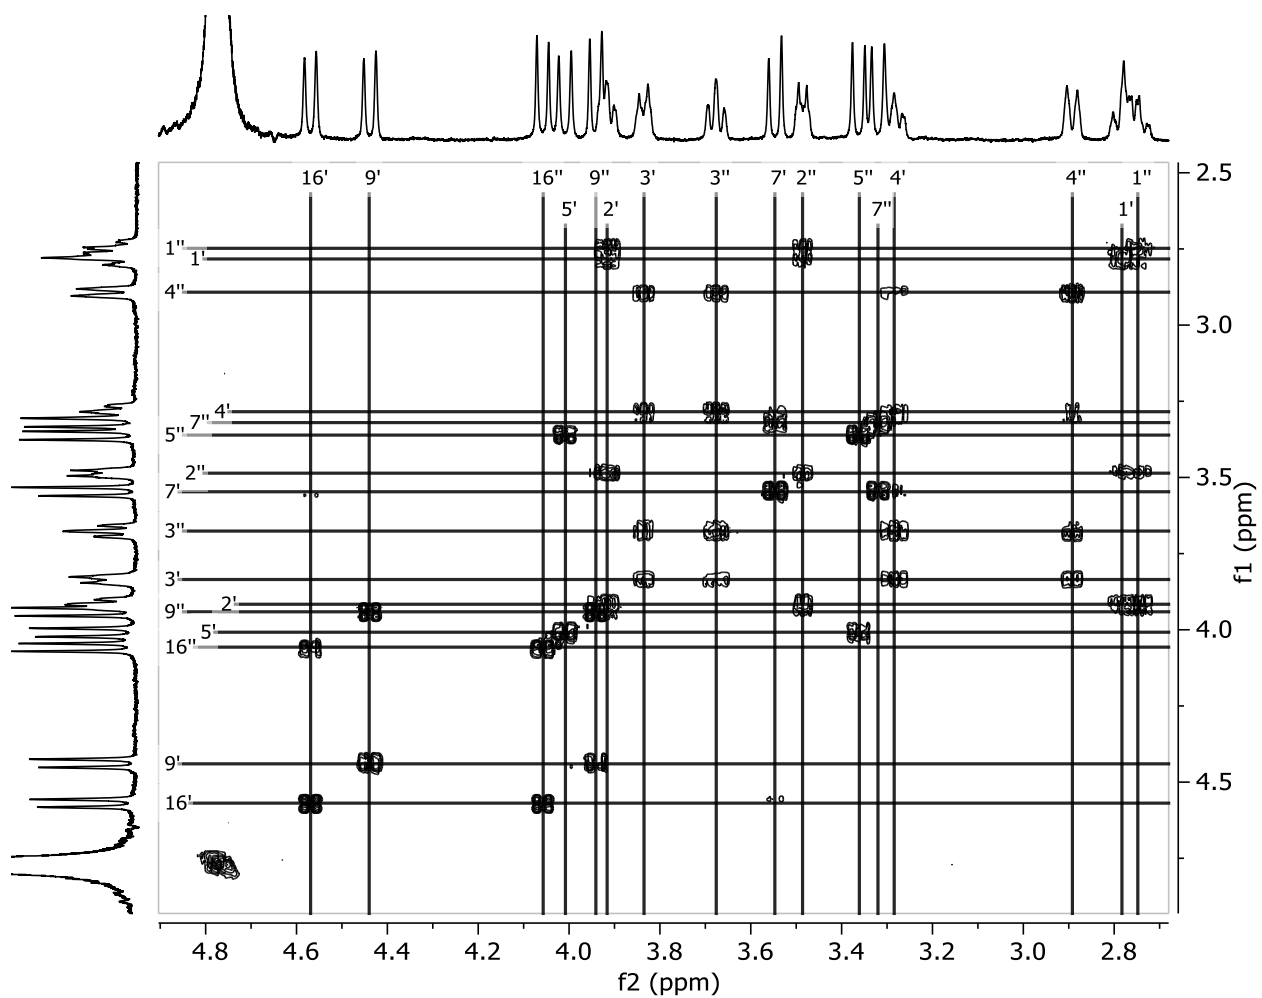

Figure 75. Expanded (aliphatic region) and labeled COSY spectrum (600 MHz, D<sub>2</sub>O, pD = 7, 25 °C) of La-Oxyaapa complex.

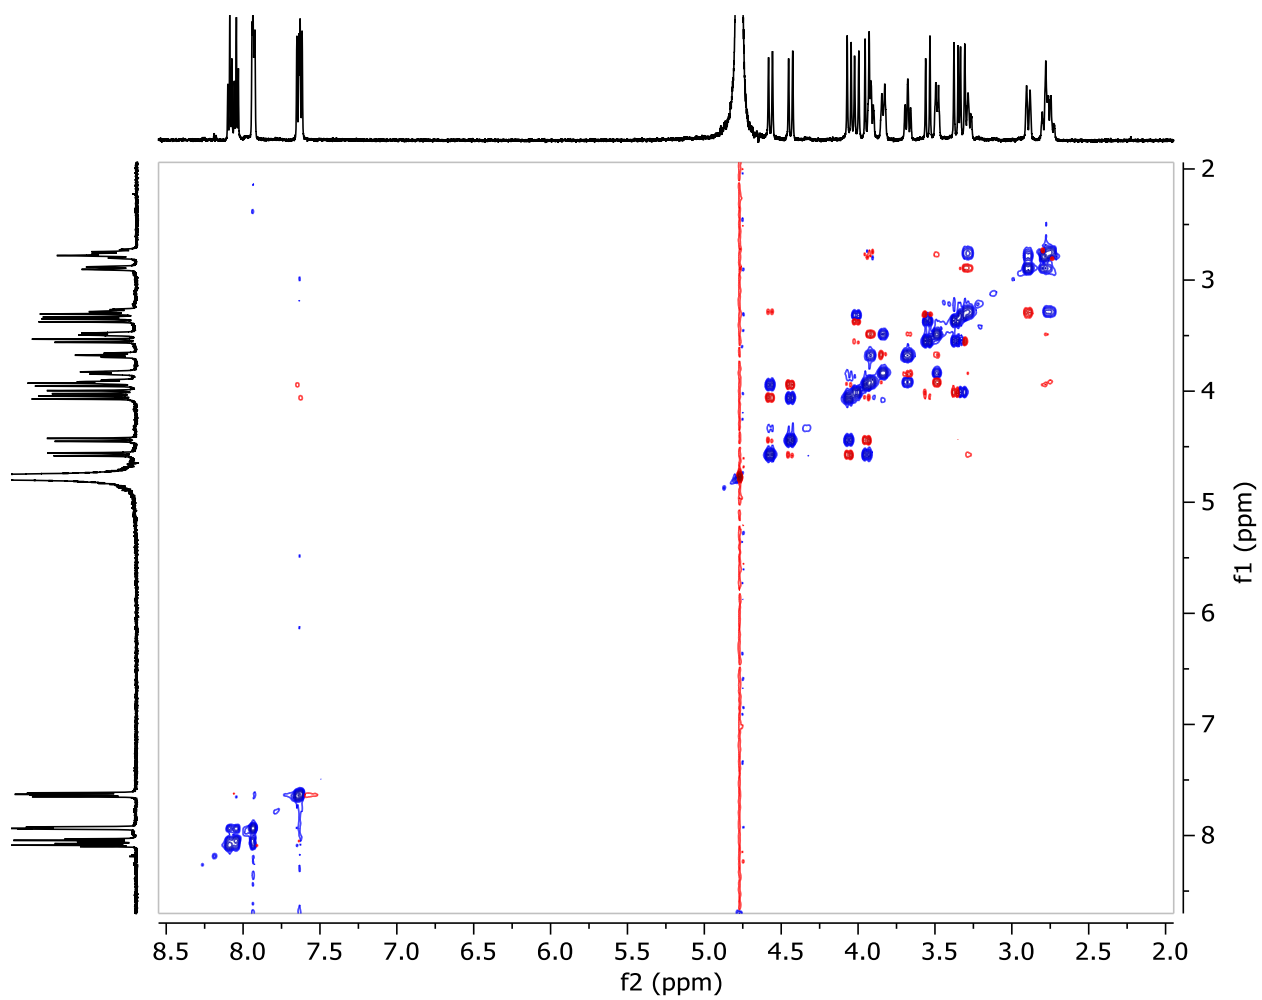

Figure S76. Full ROESY spectrum (600 MHz, D<sub>2</sub>O, pD = 7, 25 °C) of La-Oxyaapa complex.

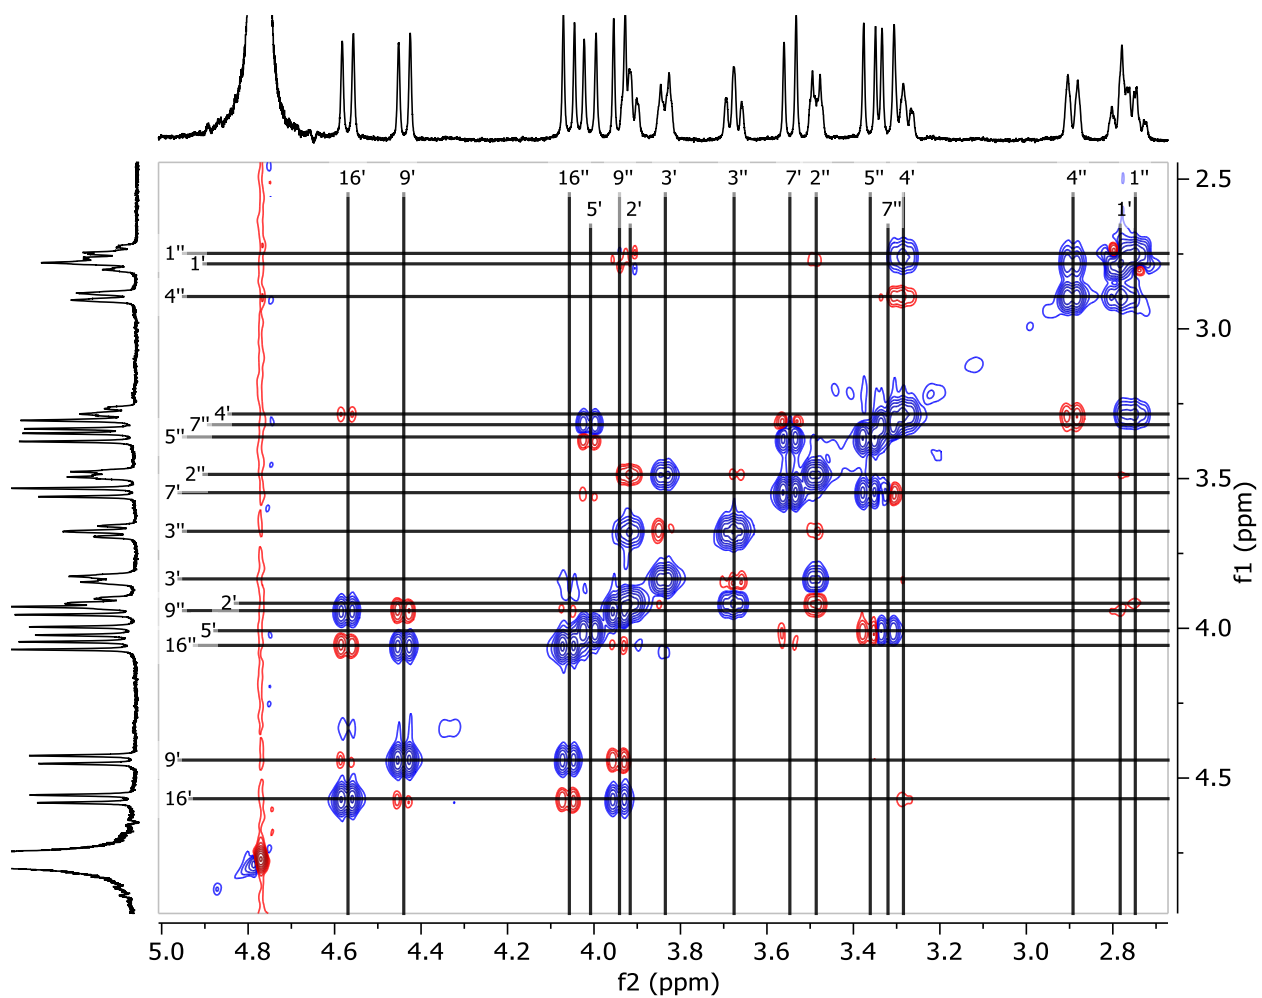

**Figure S77.** Expanded (aliphatic region) and labeled ROESY spectrum (600 MHz, D<sub>2</sub>O, pD = 7, 25 °C) of La-Oxyaapa complex.

(4) Lu-Oxyaapa complex

**Table S7.** Peak assignments of NMR spectra on Lu-Oxyaapa complex. See Chart 2 for the numbering scheme.

| Carbon/Hydrogen<br>Number | Symmetric, <i>anti</i> - |                  |
|---------------------------|--------------------------|------------------|
|                           | $\delta_C$ (ppm)         | $\delta_H$ (ppm) |
| 1                         | 57.50                    | 3.32, 2.84       |
| 2                         | 67.49                    | 3.81, 3.77       |
| 3                         | 67.49                    | 3.81, 3.77       |
| 4                         | 57.50                    | 3.32, 2.84       |
| 5                         | 62.65                    | 3.88, 3.55       |
| 6                         | 179.34                   |                  |
| 7                         | 62.65                    | 3.88, 3.55       |
| 8                         | 179.34                   |                  |
| 9                         | 63.93                    | 4.51, 4.45       |
| 10                        | 156.59                   |                  |
| 11                        | 125.26                   | 7.71             |
| 12                        | 141.51                   | 8.16             |
| 13                        | 123.92                   | 7.99             |
| 14                        | 150.28                   |                  |
| 15                        | 172.71                   |                  |
| 16                        | 63.93                    | 4.51, 4.45       |
| 17                        | 156.59                   |                  |
| 18                        | 125.26                   | 7.71             |
| 19                        | 141.51                   | 8.16             |
| 20                        | 123.92                   | 7.99             |
| 21                        | 150.28                   |                  |
| 22                        | 172.71                   |                  |

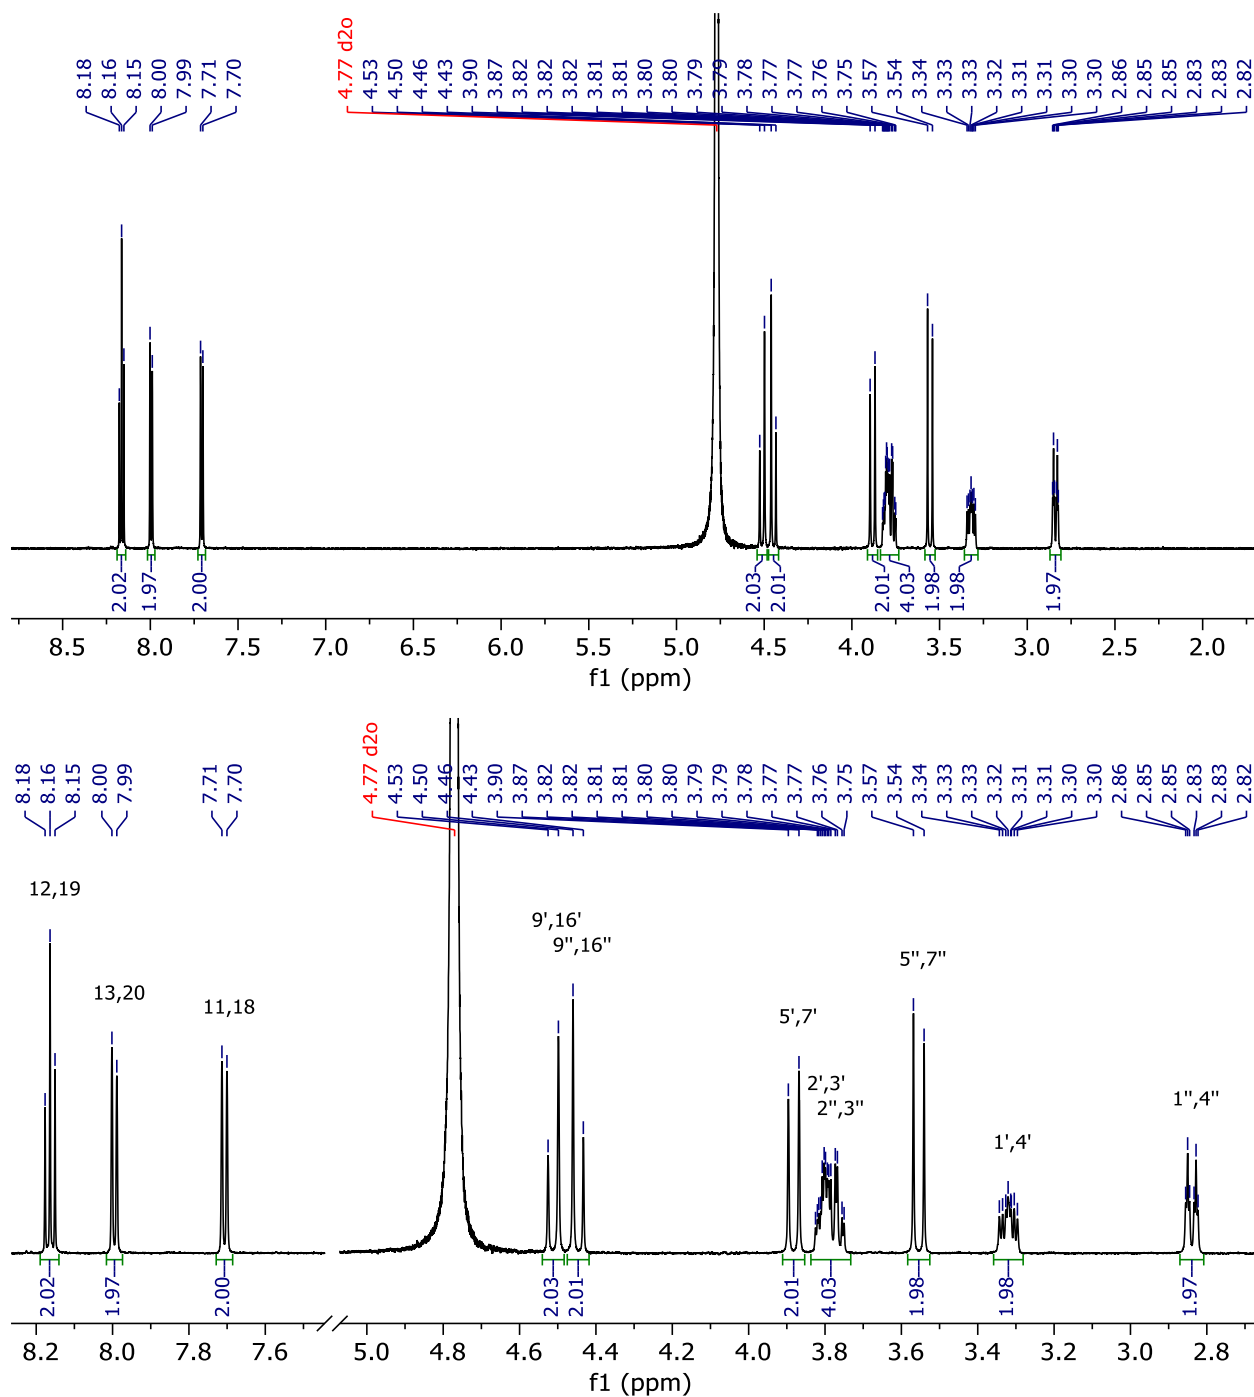

**Figure S78.** Full (top) as well as properly expanded and labeled (bottom)  $^1\text{H}$  NMR spectrum (600 MHz,  $\text{D}_2\text{O}$ ,  $\text{pD} = 7$ ,  $25\text{ }^\circ\text{C}$ ) of Lu-Oxyaapa complex.



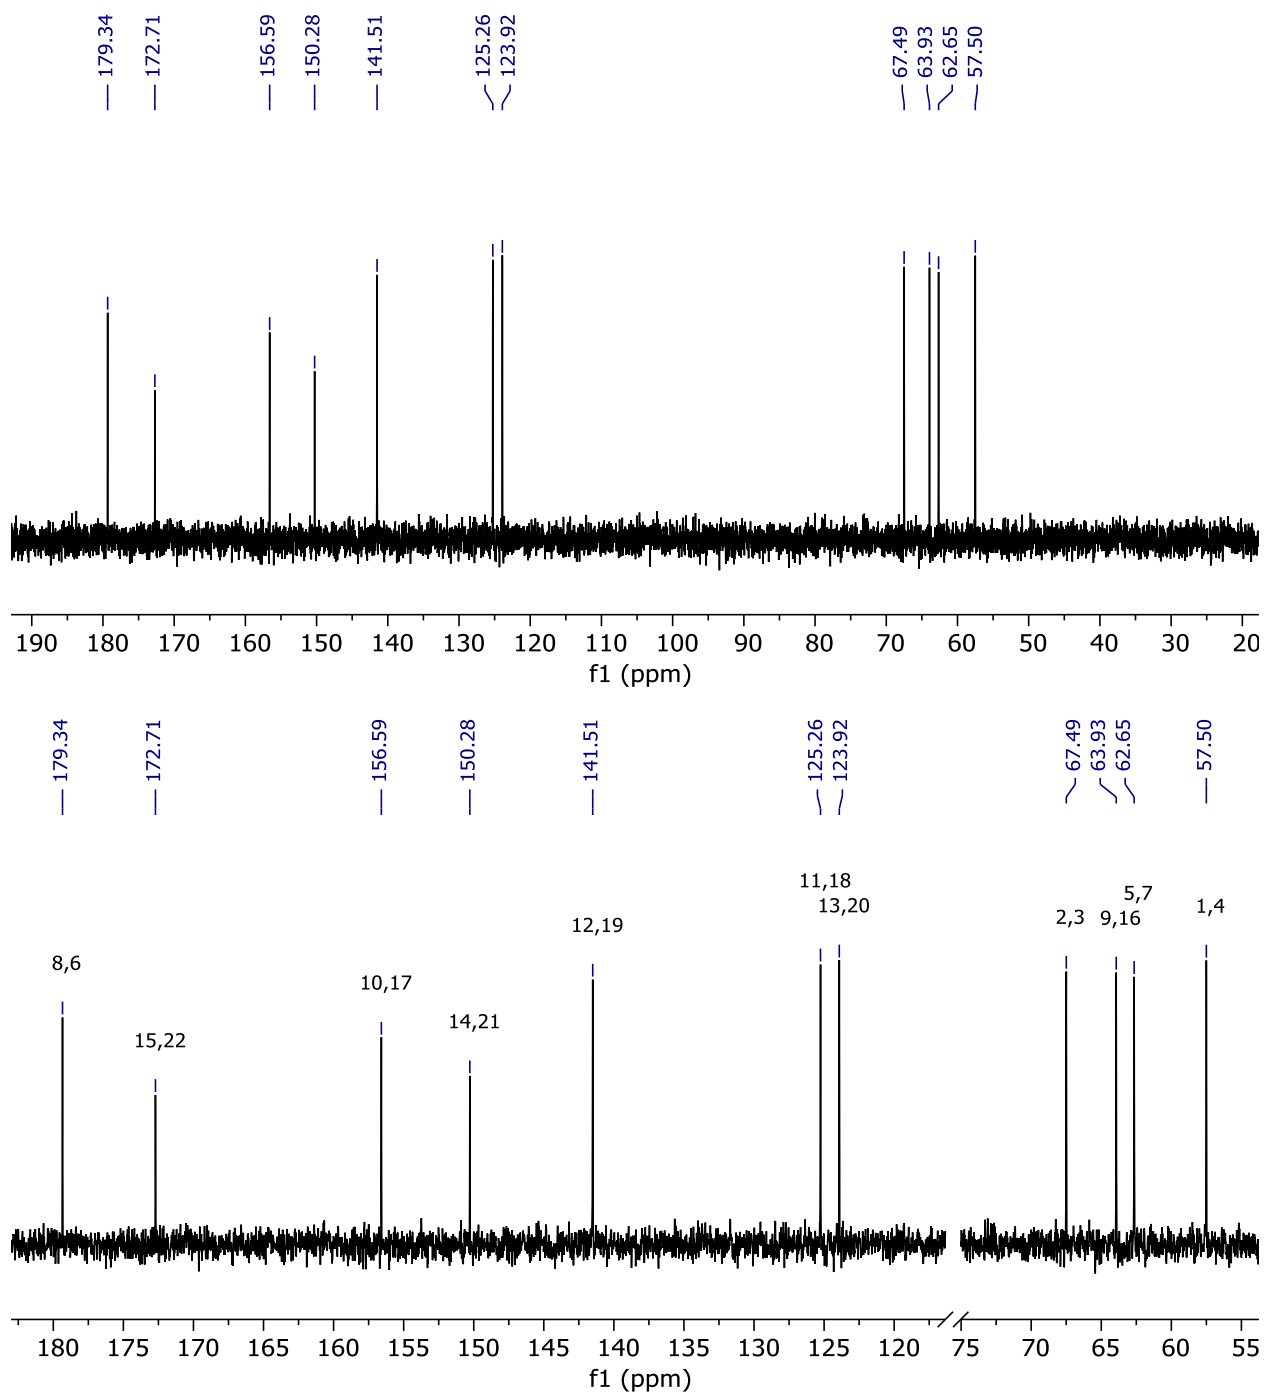

**Figure S79.** Full (top) as well as properly expanded and labeled (bottom)  $^{13}\text{C}\{^1\text{H}\}$  NMR spectrum (126 MHz,  $\text{D}_2\text{O}$ ,  $\text{pD} = 7$ ,  $25\text{ }^\circ\text{C}$ ) of Lu-Oxyaapa complex.

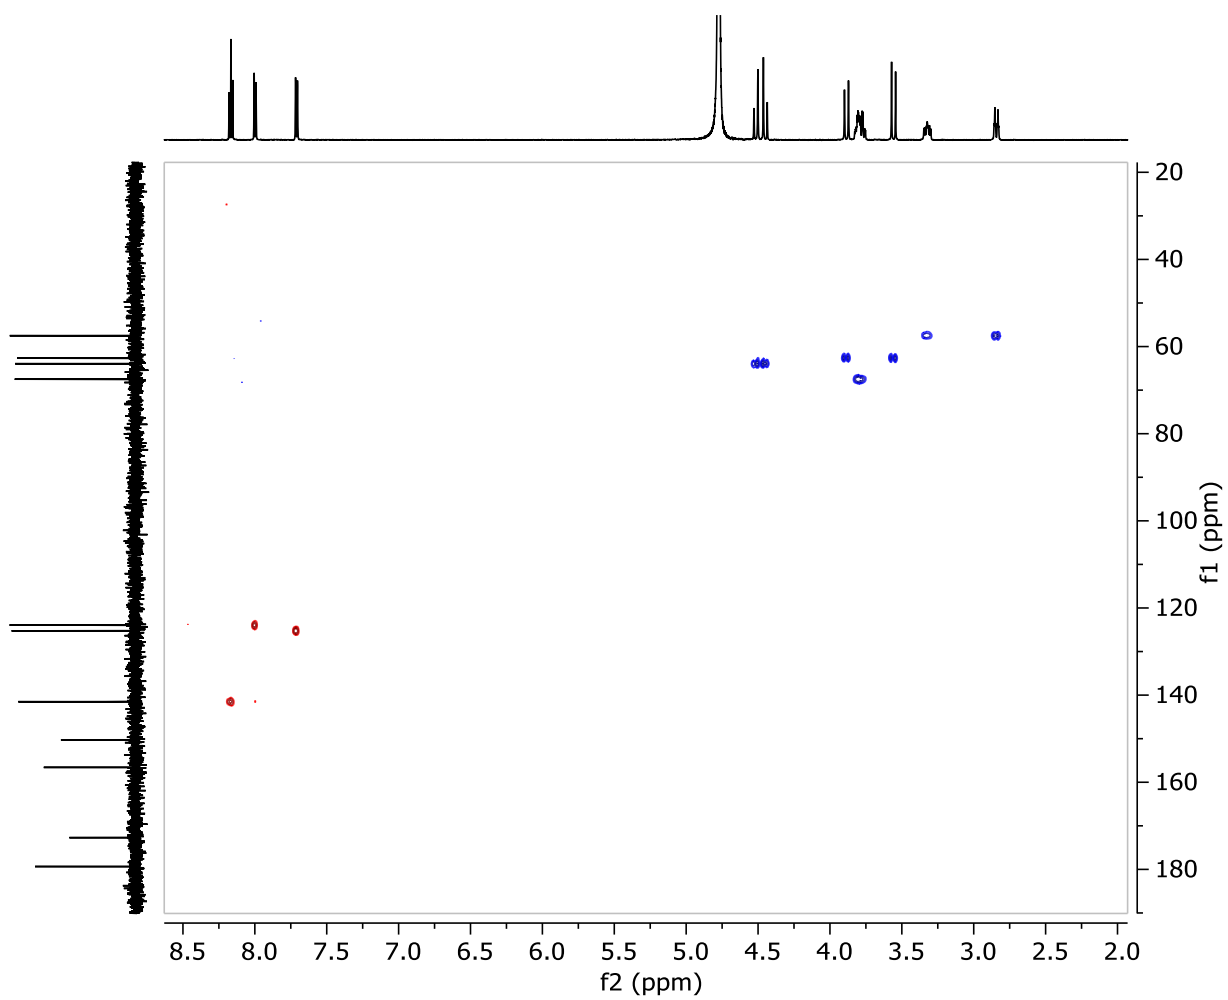

**Figure S80.** Full HSQC spectrum (600 MHz, D<sub>2</sub>O, pD = 7, 25 °C) of Lu-Oxyaapa complex.

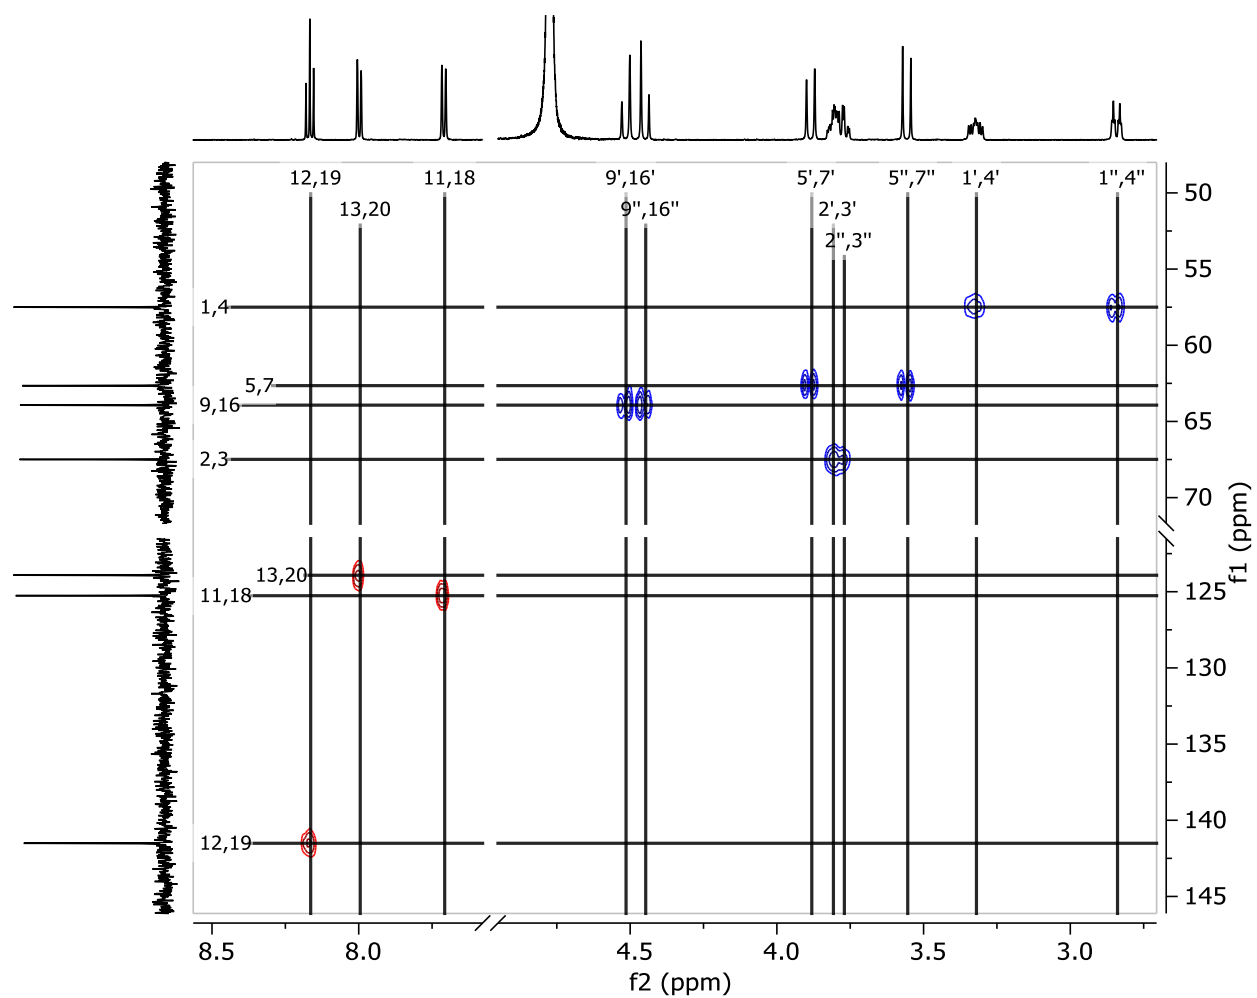

**Figure S81.** Properly expanded and labeled HSQC spectrum (600 MHz, D<sub>2</sub>O, pD = 7, 25 °C) of Lu-Oxyaapa complex.

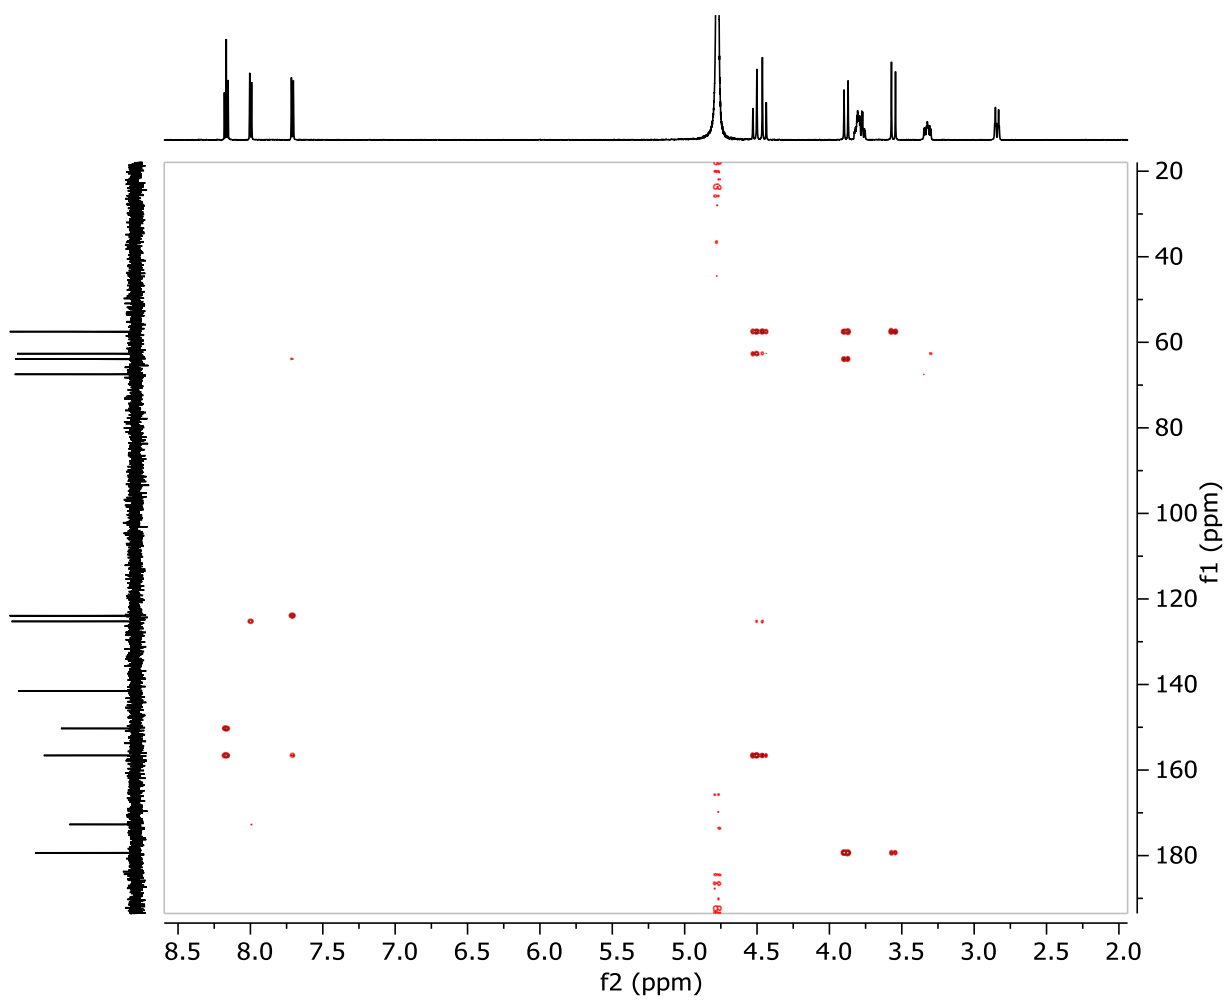

**Figure S82.** Full HMBC spectrum (600 MHz, D<sub>2</sub>O, pD = 7, 25 °C) of Lu-Oxyapa complex.

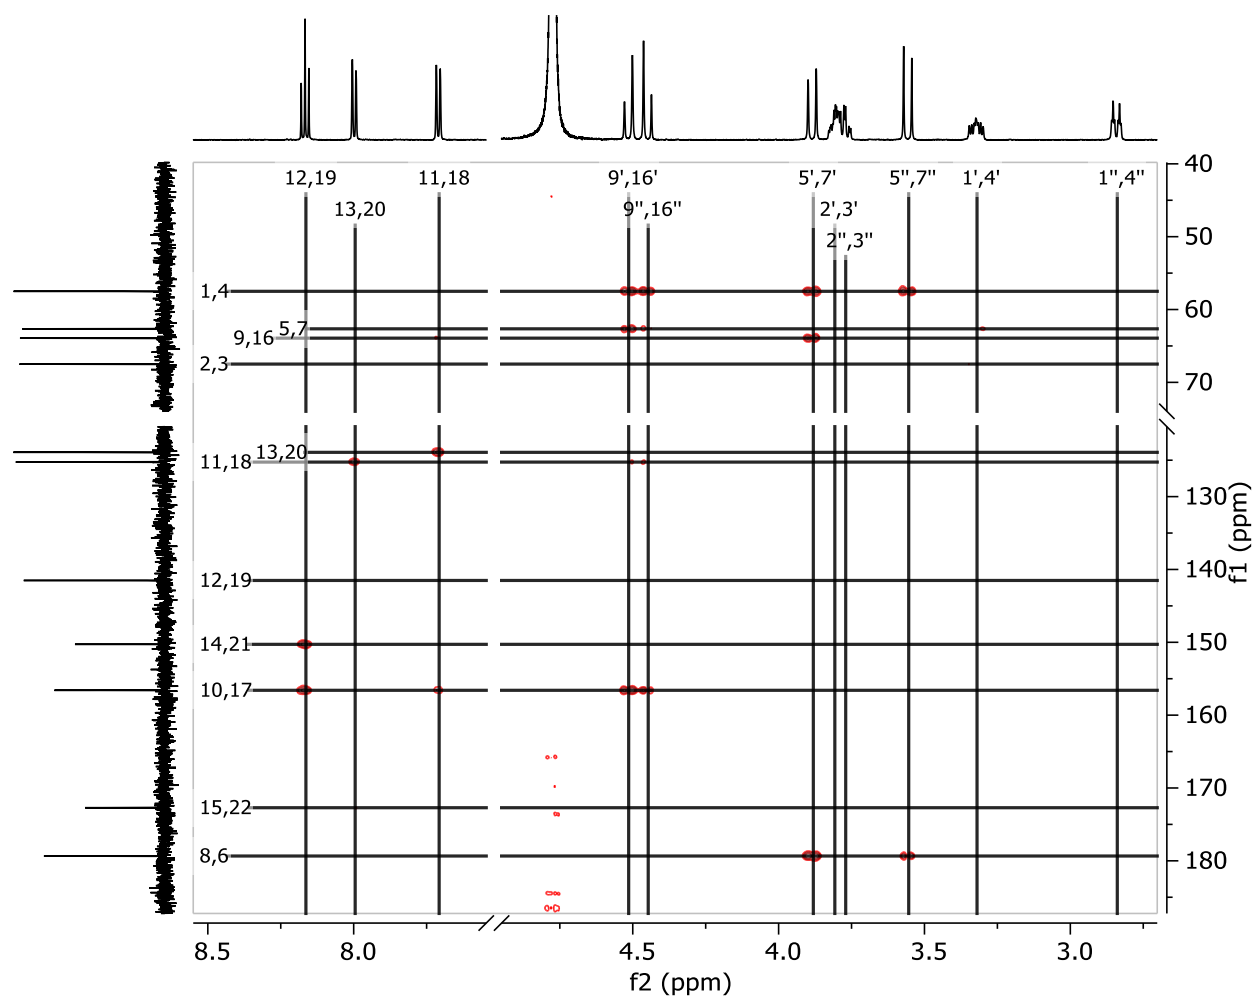

**Figure S83.** Properly expanded and labeled HMBC spectrum (600 MHz, D<sub>2</sub>O, pD = 7, 25 °C) of Lu-Oxyaapa complex.

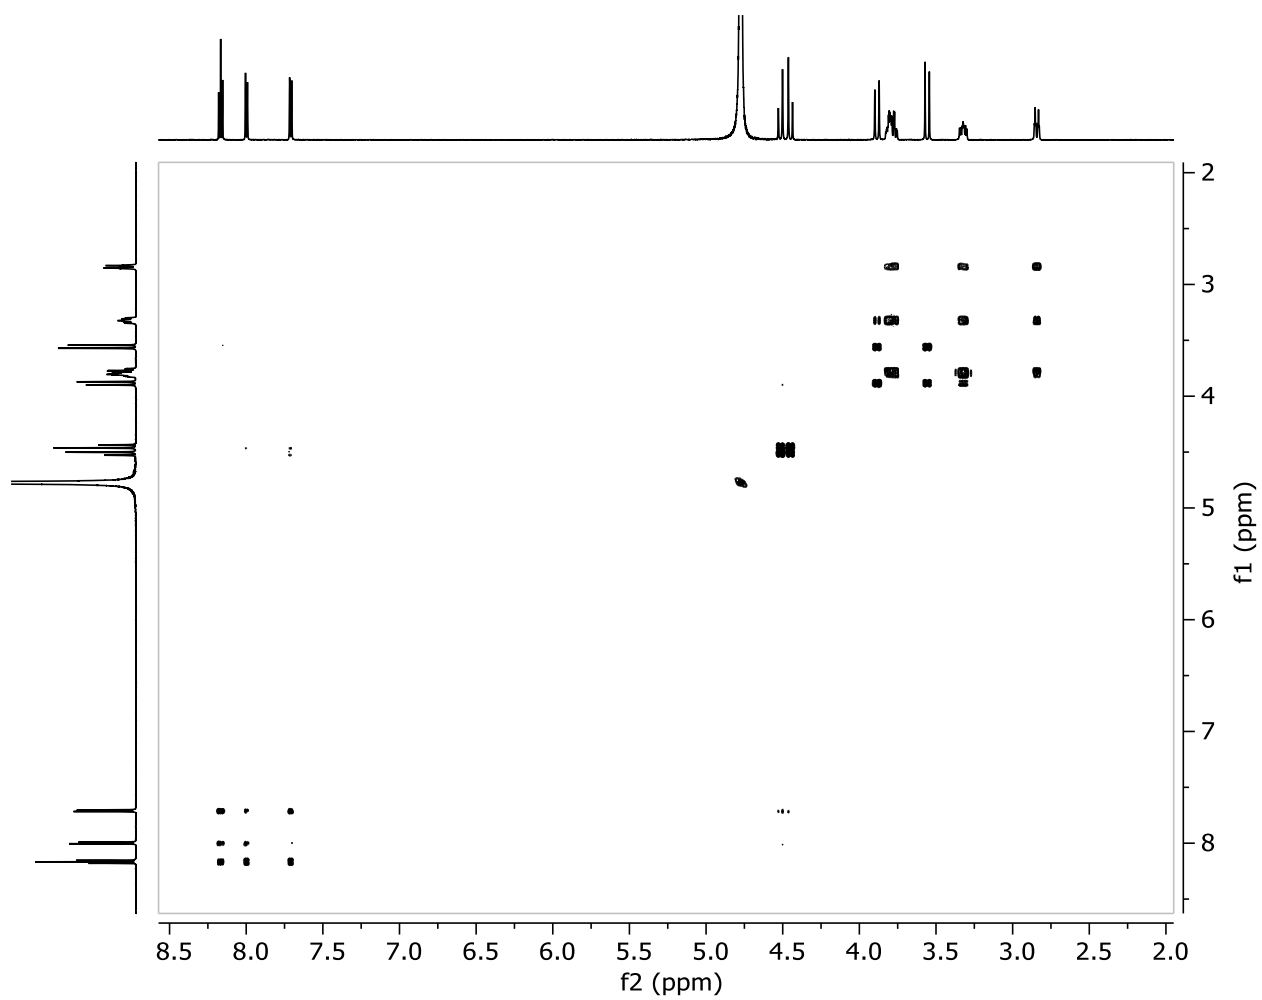

**Figure S84.** Full COSY spectrum (600 MHz, D<sub>2</sub>O, pD = 7, 25 °C) of Lu-Oxyaapa complex.

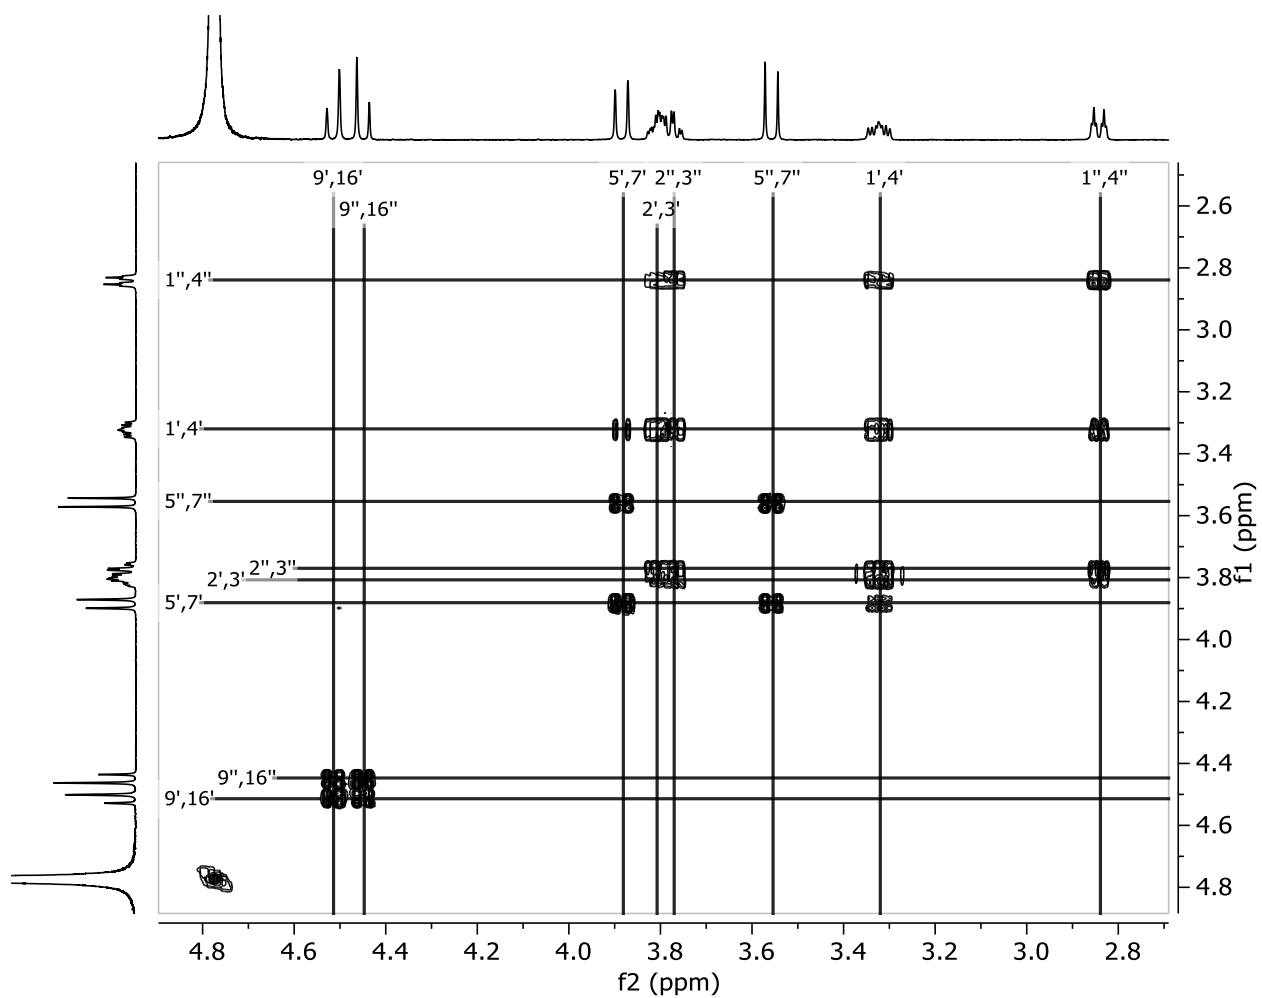

**Figure S85.** Expanded (aliphatic region) and labeled COSY spectrum (600 MHz, D<sub>2</sub>O, pD = 7, 25 °C) of Lu-Oxyaapa complex.

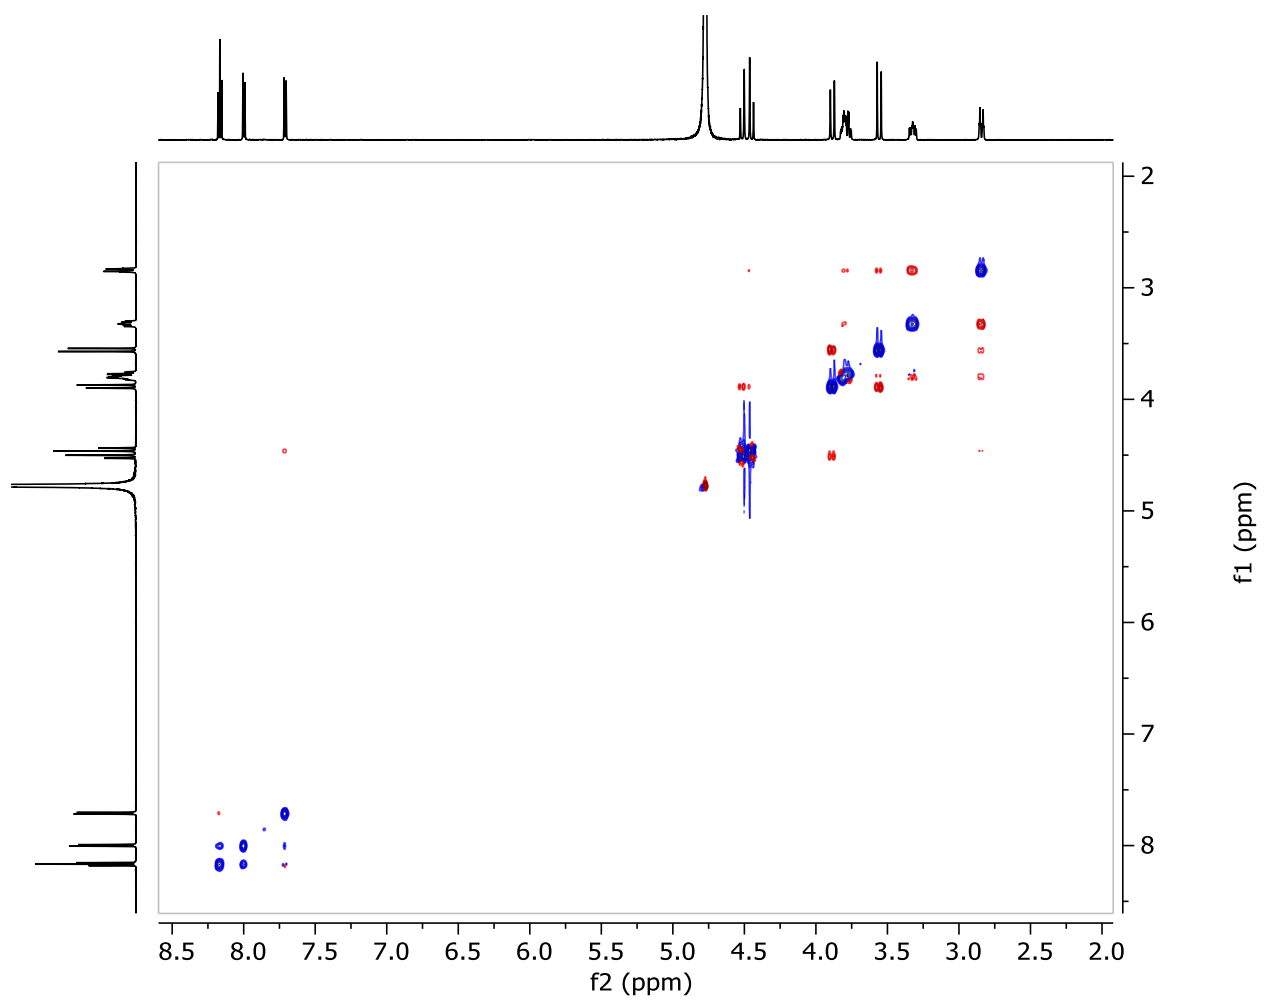

**Figure S86.** Expanded (aliphatic region) and labeled ROESY spectrum (600 MHz, D<sub>2</sub>O, pD = 7, 25 °C) of Lu-Oxyaapa complex.



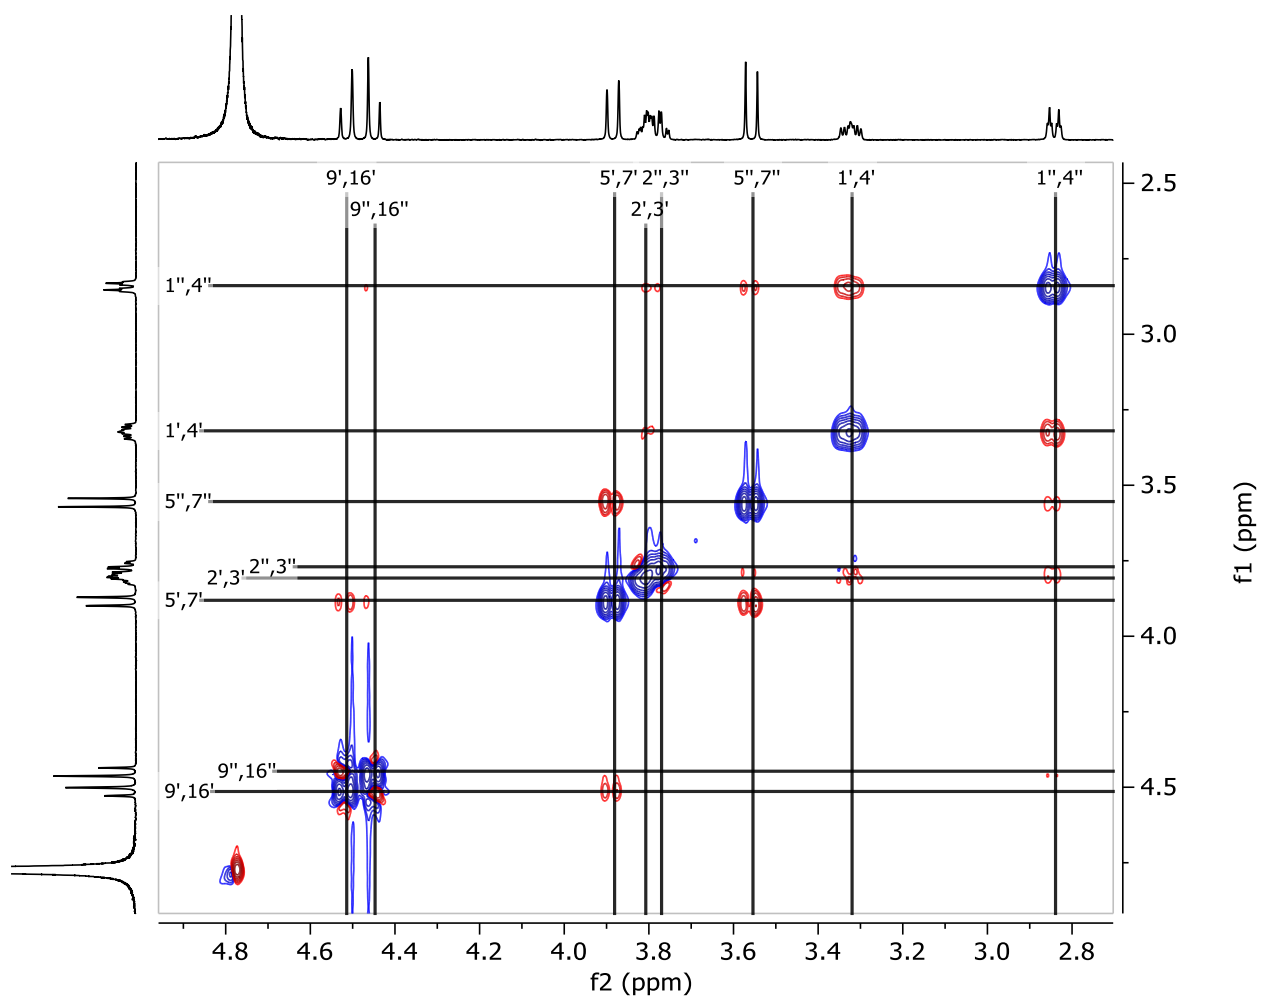

**Figure S87.** Expanded (aliphatic region) and labeled ROESY spectrum (600 MHz, D<sub>2</sub>O, pD = 7, 25 °C) of Lu-Oxyaapa complex.

## 9. Luminescence Lifetime Measurements

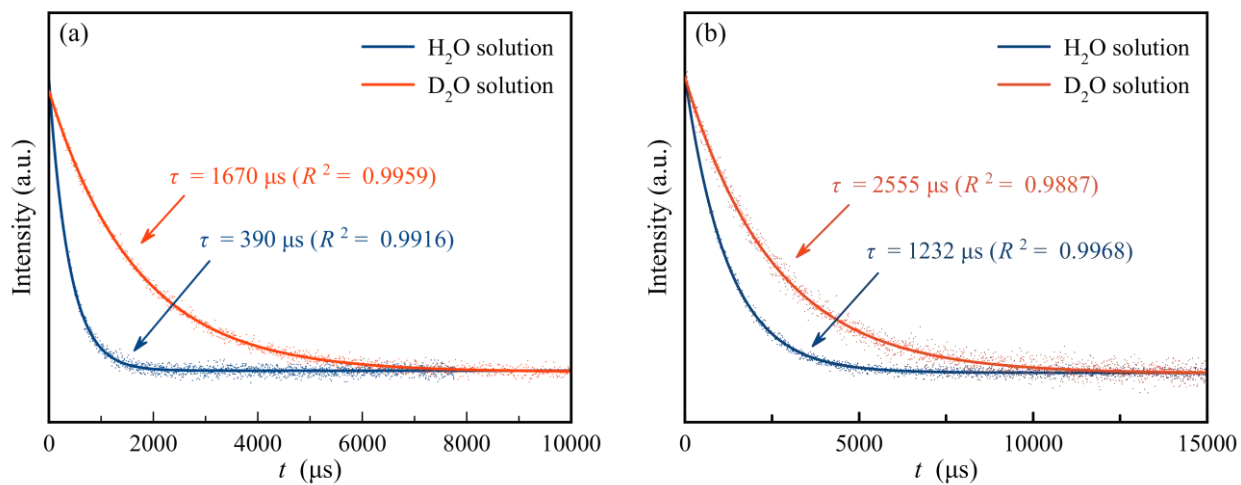

**Figure S88.** (a) Luminescence decay curve of Eu(III)-OxyMepa complex in  $\text{H}_2\text{O}$  and  $\text{D}_2\text{O}$ ; (b) Luminescence decay curve of Tb(III)-OxyMepa complex in  $\text{H}_2\text{O}$  and  $\text{D}_2\text{O}$ .

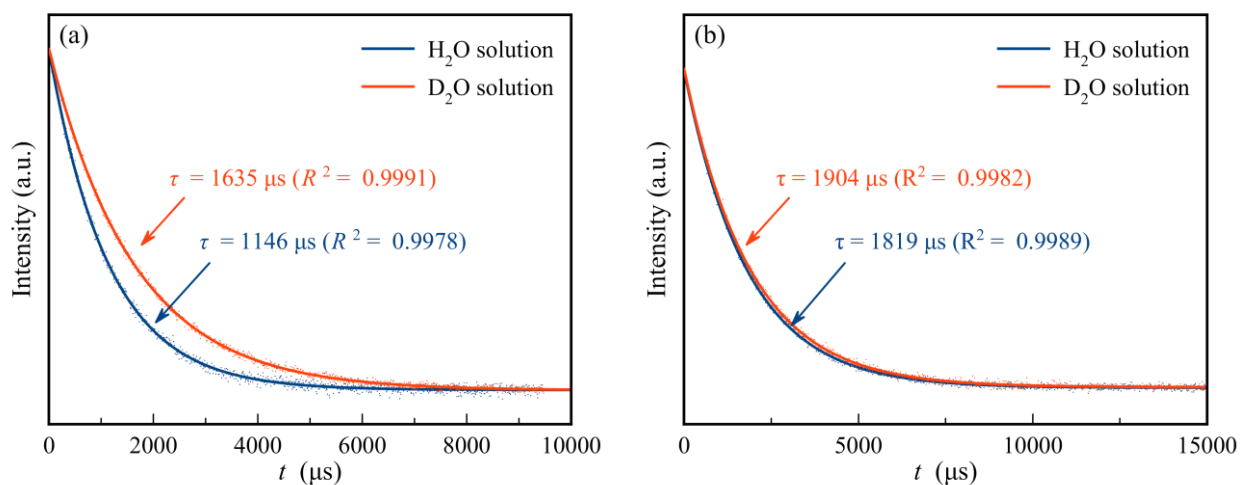

**Figure S89.** (a) Luminescence decay curve of Eu(III)-Oxyaapa complex in  $\text{H}_2\text{O}$  and  $\text{D}_2\text{O}$ ; (b) Luminescence decay curve of Tb(III)-Oxyaapa complex in  $\text{H}_2\text{O}$  and  $\text{D}_2\text{O}$ .

## 10. DFT Calculations

(1) Lu-OxyMepa,  $N1^S N2^S(\delta\delta)$ , enantiomer of  $N1^R N2^R(\lambda\lambda)$

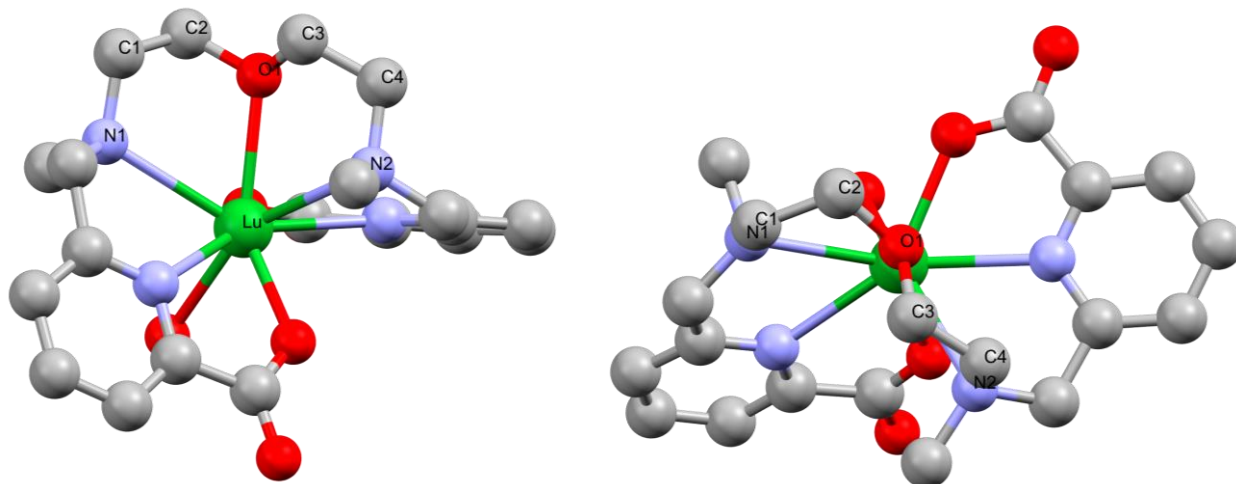

**Figure S90.** Side view (left) and top view (right) of optimized Lu-OxyMepa complex in  $N1^S N2^S(\delta\delta)$  conformation. Hydrogen atoms are omitted for clarity.

Optimized Cartesian coordinates in Å:

| Atomic # | x         | y         | z         |
|----------|-----------|-----------|-----------|
| 6        | -1.583201 | -0.481928 | 2.786760  |
| 6        | -2.804427 | 0.041115  | 2.064235  |
| 6        | -4.017065 | 0.282013  | 2.718948  |
| 6        | -5.094215 | 0.776044  | 1.986897  |
| 6        | -4.950064 | 0.991591  | 0.614933  |
| 6        | -3.715656 | 0.720907  | 0.032767  |
| 6        | -3.467427 | 0.869584  | -1.455200 |
| 8        | -4.383462 | 1.276470  | -2.187336 |
| 6        | -1.378293 | -2.590582 | 1.600270  |
| 8        | -1.127793 | -2.302166 | -0.765377 |
| 6        | -0.819757 | -2.838108 | -2.070214 |
| 6        | 0.674706  | -2.791990 | -2.340180 |
| 7        | 1.204348  | -1.416201 | -2.202307 |
| 6        | 2.627517  | -1.433470 | -1.822688 |
| 6        | 3.066455  | -0.155695 | -1.150047 |
| 6        | 4.381722  | 0.310558  | -1.250877 |
| 6        | 4.760412  | 1.431690  | -0.518011 |
| 6        | 3.819755  | 2.058590  | 0.300075  |
| 6        | 2.526576  | 1.545014  | 0.333230  |
| 6        | 1.443316  | 2.169115  | 1.189104  |
| 8        | 1.724027  | 3.137183  | 1.914605  |
| 6        | 1.037685  | -0.668523 | -3.467745 |

|    |           |           |           |
|----|-----------|-----------|-----------|
| 8  | 0.276694  | 1.623588  | 1.095120  |
| 7  | 2.159337  | 0.465107  | -0.382166 |
| 8  | -2.285374 | 0.531792  | -1.855883 |
| 7  | -2.669443 | 0.276424  | 0.751735  |
| 1  | 0.875368  | -3.202361 | -3.341006 |
| 1  | 1.188964  | -3.435480 | -1.622920 |
| 1  | -1.189919 | -3.866943 | -2.141465 |
| 1  | -1.378406 | -2.220928 | -2.777743 |
| 1  | 4.068477  | 2.928872  | 0.894914  |
| 1  | 5.775067  | 1.811841  | -0.582526 |
| 1  | 5.087839  | -0.205119 | -1.893045 |
| 1  | -5.768653 | 1.350182  | 0.002818  |
| 1  | -6.042642 | 0.973918  | 2.476389  |
| 1  | -4.107421 | 0.077729  | 3.780560  |
| 71 | -0.434856 | 0.132800  | -0.509608 |
| 7  | -0.727488 | -1.295356 | 1.900250  |
| 1  | -0.989679 | 0.368965  | 3.137837  |
| 1  | -1.894721 | -1.045768 | 3.678437  |
| 6  | 0.589942  | -1.495438 | 2.528522  |
| 1  | 1.223757  | -2.111164 | 1.886559  |
| 1  | 1.077874  | -0.528477 | 2.669568  |
| 1  | 0.504036  | -1.993562 | 3.506490  |
| 6  | -0.860300 | -3.212766 | 0.320928  |
| 1  | 0.212503  | -3.425220 | 0.380887  |
| 1  | -1.386377 | -4.155764 | 0.132108  |
| 1  | -1.235818 | -3.303214 | 2.426758  |
| 1  | -2.453634 | -2.426806 | 1.496249  |
| 8  | -0.079692 | 2.200010  | -1.780568 |
| 1  | -0.060064 | 2.957118  | -1.175472 |
| 1  | -0.938944 | 2.252950  | -2.231754 |
| 1  | 1.573625  | -1.158755 | -4.294417 |
| 1  | 1.427444  | 0.345622  | -3.357774 |
| 1  | -0.020548 | -0.600995 | -3.731155 |
| 1  | 2.781623  | -2.244232 | -1.101523 |
| 1  | 3.276044  | -1.647587 | -2.684053 |

Output energies:

|                                              |                             |
|----------------------------------------------|-----------------------------|
| Zero-point correction=                       | 0.458399 (Hartree/Particle) |
| Thermal correction to Energy=                | 0.488502                    |
| Thermal correction to Enthalpy=              | 0.489446                    |
| Thermal correction to Gibbs Free Energy=     | 0.397998                    |
| Sum of electronic and zero-point Energies=   | -1487.882825                |
| Sum of electronic and thermal Energies=      | -1487.852722                |
| Sum of electronic and thermal Enthalpies=    | -1487.851778                |
| Sum of electronic and thermal Free Energies= | -1487.943226                |

(2) Lu-OxyMepa,  $N1^S N2^S(\delta\lambda)$ , enantiomer of  $N1^R N2^R(\lambda\delta)$

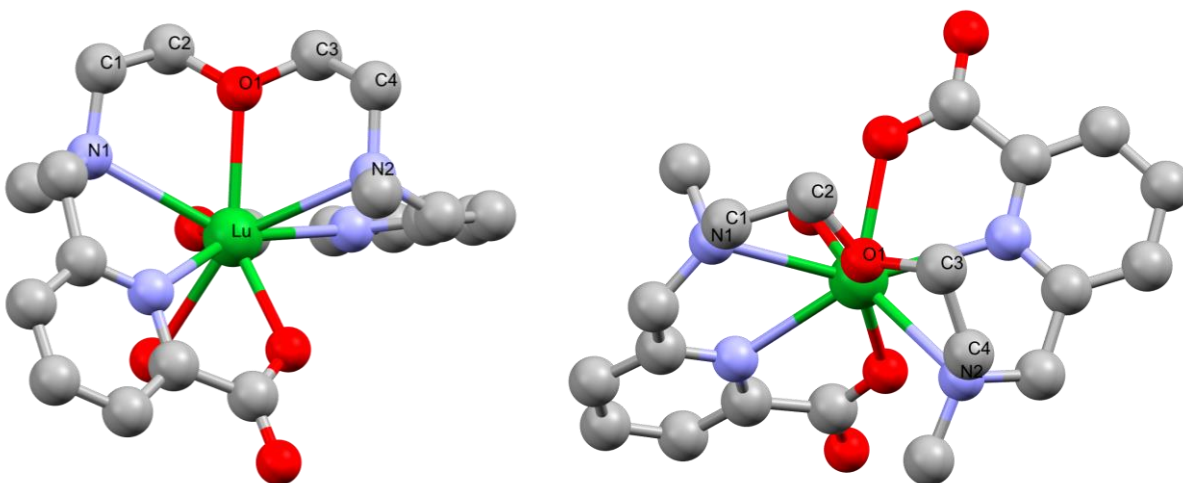

**Figure S91.** Side view (left) and top view (right) of optimized Lu-OxyMepa complex in  $N1^S N2^S(\delta\lambda)$  conformation. Hydrogen atoms are omitted for clarity.

Optimized Cartesian coordinates in Å:

| Atomic # | x         | y         | z         |
|----------|-----------|-----------|-----------|
| 6        | -1.673938 | -0.596452 | 2.830880  |
| 6        | -2.847348 | -0.137754 | 2.002114  |
| 6        | -4.145934 | -0.037560 | 2.510474  |
| 6        | -5.165367 | 0.406434  | 1.670803  |
| 6        | -4.872628 | 0.709878  | 0.340300  |
| 6        | -3.556908 | 0.574483  | -0.092664 |
| 6        | -3.150801 | 0.802798  | -1.532622 |
| 8        | -3.990268 | 1.231077  | -2.341713 |
| 6        | -1.203228 | -2.752183 | 1.724710  |
| 8        | -0.729161 | -2.385742 | -0.571225 |
| 6        | -0.748932 | -2.821160 | -1.946761 |
| 6        | 0.674816  | -2.692393 | -2.460931 |
| 7        | 1.211485  | -1.315899 | -2.302458 |
| 6        | 2.661758  | -1.338394 | -2.033451 |
| 6        | 3.151219  | -0.094343 | -1.330500 |
| 6        | 4.432601  | 0.419907  | -1.554625 |
| 6        | 4.867229  | 1.507970  | -0.802437 |
| 6        | 4.013982  | 2.059659  | 0.153747  |
| 6        | 2.748336  | 1.502896  | 0.310277  |
| 6        | 1.755055  | 2.056563  | 1.314032  |
| 8        | 2.099563  | 2.994010  | 2.051915  |
| 6        | 0.927260  | -0.499494 | -3.498907 |
| 8        | 0.593476  | 1.492309  | 1.322917  |
| 7        | 2.331721  | 0.448518  | -0.417074 |

|    |           |           |           |
|----|-----------|-----------|-----------|
| 8  | -1.925796 | 0.505092  | -1.812450 |
| 7  | -2.569087 | 0.188016  | 0.732766  |
| 1  | 0.716555  | -3.019071 | -3.509331 |
| 1  | 1.298989  | -3.375424 | -1.879605 |
| 1  | -1.062013 | -3.869150 | -1.993929 |
| 1  | -1.462143 | -2.213613 | -2.514743 |
| 1  | 4.307166  | 2.906538  | 0.761888  |
| 1  | 5.857512  | 1.923169  | -0.961126 |
| 1  | 5.069500  | -0.032762 | -2.307020 |
| 1  | -5.638491 | 1.029475  | -0.355964 |
| 1  | -6.181318 | 0.494393  | 2.042657  |
| 1  | -4.346477 | -0.312622 | 3.540288  |
| 71 | -0.177690 | -0.006373 | -0.240169 |
| 7  | -0.699679 | -1.377160 | 2.032970  |
| 1  | -1.155600 | 0.289512  | 3.213535  |
| 1  | -2.026243 | -1.168134 | 3.700179  |
| 6  | 0.571642  | -1.472385 | 2.786618  |
| 1  | 1.313417  | -2.001834 | 2.183919  |
| 1  | 0.945522  | -0.469067 | 2.997876  |
| 1  | 0.445183  | -2.010592 | 3.737005  |
| 6  | -1.740594 | -2.915134 | 0.308062  |
| 1  | -0.365890 | -3.444403 | 1.839356  |
| 1  | -1.975438 | -3.054192 | 2.442906  |
| 8  | 0.049080  | 2.300231  | -1.484391 |
| 1  | -0.162723 | 2.922997  | -0.773202 |
| 1  | -0.802096 | 2.109394  | -1.919171 |
| 1  | 1.442839  | -0.898982 | -4.385189 |
| 1  | 1.259158  | 0.528865  | -3.337497 |
| 1  | -0.146105 | -0.487719 | -3.696896 |
| 1  | 2.874800  | -2.183435 | -1.369497 |
| 1  | 3.242249  | -1.500561 | -2.952525 |
| 1  | -1.884817 | -3.980584 | 0.099394  |
| 1  | -2.688389 | -2.394707 | 0.139839  |

Output energies:

|                                              |                             |
|----------------------------------------------|-----------------------------|
| Zero-point correction=                       | 0.458510 (Hartree/Particle) |
| Thermal correction to Energy=                | 0.489367                    |
| Thermal correction to Enthalpy=              | 0.490311                    |
| Thermal correction to Gibbs Free Energy=     | 0.397110                    |
| Sum of electronic and zero-point Energies=   | -1487.876643                |
| Sum of electronic and thermal Energies=      | -1487.845787                |
| Sum of electronic and thermal Enthalpies=    | -1487.844843                |
| Sum of electronic and thermal Free Energies= | -1487.938043                |

(3) Lu-OxyMepa,  $N1^S N2^S(\lambda\delta)$ , enantiomer of  $N1^R N2^R(\delta\lambda)$

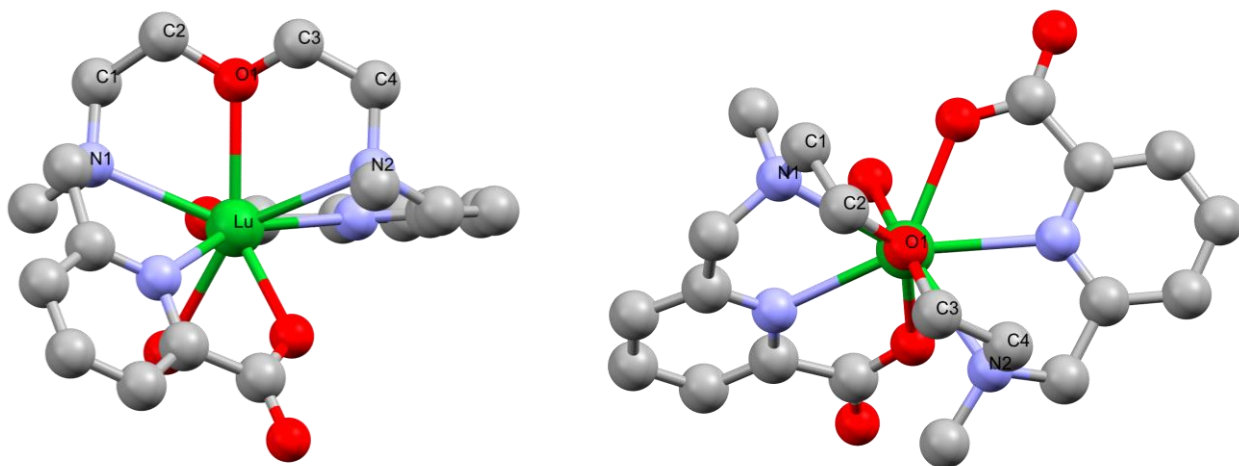

**Figure S92.** Side view (left) and top view (right) of optimized Lu-OxyMepa complex in  $N1^S N2^S(\lambda\delta)$  conformation. Hydrogen atoms are omitted for clarity.

Optimized Cartesian coordinates in Å:

| Atomic # | x         | y         | z         |
|----------|-----------|-----------|-----------|
| 6        | -1.735560 | -0.348118 | 2.838917  |
| 6        | -2.919764 | 0.074731  | 2.001003  |
| 6        | -4.194578 | 0.261534  | 2.545349  |
| 6        | -5.234719 | 0.657860  | 1.707638  |
| 6        | -4.985729 | 0.839277  | 0.346301  |
| 6        | -3.691378 | 0.630735  | -0.119993 |
| 6        | -3.325004 | 0.762259  | -1.582155 |
| 8        | -4.193281 | 1.111282  | -2.398805 |
| 6        | -1.373126 | -2.507546 | 1.802037  |
| 8        | -0.609217 | -2.476000 | -0.481151 |
| 6        | -0.065293 | -3.224027 | -1.585127 |
| 6        | 0.124310  | -2.307408 | -2.776754 |
| 7        | 0.904973  | -1.091381 | -2.455740 |
| 6        | 2.312141  | -1.402697 | -2.120095 |
| 6        | 2.956287  | -0.285104 | -1.334505 |
| 6        | 4.301674  | 0.063779  | -1.482416 |
| 6        | 4.829455  | 1.072163  | -0.678700 |
| 6        | 4.004305  | 1.715545  | 0.244927  |
| 6        | 2.672865  | 1.320095  | 0.327441  |
| 6        | 1.687054  | 1.982812  | 1.270234  |
| 8        | 2.084098  | 2.881886  | 2.029225  |
| 6        | 0.863909  | -0.166398 | -3.608140 |
| 8        | 0.474243  | 1.546840  | 1.199356  |
| 7        | 2.171204  | 0.335640  | -0.440399 |

|    |           |           |           |
|----|-----------|-----------|-----------|
| 8  | -2.097611 | 0.483270  | -1.868970 |
| 7  | -2.685093 | 0.272260  | 0.695975  |
| 1  | -0.852744 | -1.976367 | -3.140313 |
| 1  | 0.597844  | -2.886581 | -3.584258 |
| 1  | 0.874933  | -3.689424 | -1.267987 |
| 1  | -0.760132 | -4.028596 | -1.853626 |
| 1  | 4.369327  | 2.513219  | 0.880334  |
| 1  | 5.870837  | 1.361439  | -0.778609 |
| 1  | 4.914041  | -0.445578 | -2.218649 |
| 1  | -5.768448 | 1.124498  | -0.346070 |
| 1  | -6.232775 | 0.806876  | 2.107538  |
| 1  | -4.361513 | 0.087606  | 3.602956  |
| 71 | -0.323503 | 0.027298  | -0.344420 |
| 7  | -0.782263 | -1.177582 | 2.070140  |
| 1  | -1.203883 | 0.548077  | 3.176012  |
| 1  | -2.086360 | -0.873238 | 3.739024  |
| 6  | 0.481272  | -1.299926 | 2.822949  |
| 1  | 1.205164  | -1.887115 | 2.254126  |
| 1  | 0.901287  | -0.306645 | 2.988687  |
| 1  | 0.327287  | -1.788237 | 3.796733  |
| 6  | -0.635366 | -3.268436 | 0.723133  |
| 1  | 0.394229  | -3.511034 | 1.010828  |
| 1  | -1.163474 | -4.208245 | 0.524071  |
| 1  | -1.389742 | -3.121023 | 2.715953  |
| 1  | -2.409471 | -2.369554 | 1.484991  |
| 8  | -0.100514 | 2.327470  | -1.562966 |
| 1  | -0.275019 | 2.933335  | -0.827322 |
| 1  | -0.966662 | 2.174208  | -1.980591 |
| 1  | 1.278353  | -0.640391 | -4.510038 |
| 1  | 1.448882  | 0.728822  | -3.389432 |
| 1  | -0.167784 | 0.126739  | -3.809897 |
| 1  | 2.342625  | -2.301660 | -1.497089 |
| 1  | 2.897228  | -1.621574 | -3.023498 |

Output energies:

|                                              |                             |
|----------------------------------------------|-----------------------------|
| Zero-point correction=                       | 0.457373 (Hartree/Particle) |
| Thermal correction to Energy=                | 0.488143                    |
| Thermal correction to Enthalpy=              | 0.489087                    |
| Thermal correction to Gibbs Free Energy=     | 0.394741                    |
| Sum of electronic and zero-point Energies=   | -1487.888635                |
| Sum of electronic and thermal Energies=      | -1487.857865                |
| Sum of electronic and thermal Enthalpies=    | -1487.856920                |
| Sum of electronic and thermal Free Energies= | -1487.951267                |



(4) Lu-OxyMepa,  $N1^S N2^S(\lambda\lambda)$ , enantiomer of  $N1^R N2^R(\delta\delta)$

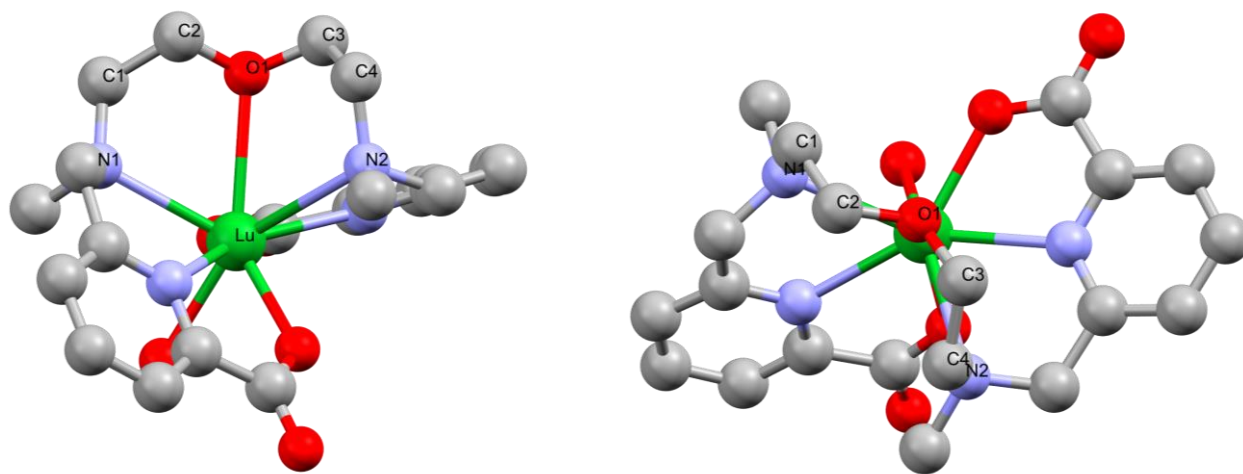

**Figure S93.** Side view (left) and top view (right) of optimized Lu-OxyMepa complex in  $N1^S N2^S(\lambda\lambda)$  conformation. Hydrogen atoms are omitted for clarity.

Optimized Cartesian coordinates in Å:

| Atomic # | x         | y         | z         |
|----------|-----------|-----------|-----------|
| 6        | -1.635049 | -0.502474 | 2.775730  |
| 6        | -2.858647 | -0.188641 | 1.945588  |
| 6        | -4.142779 | -0.267525 | 2.497375  |
| 6        | -5.242823 | 0.066066  | 1.713133  |
| 6        | -5.040614 | 0.449953  | 0.387581  |
| 6        | -3.736788 | 0.497306  | -0.094892 |
| 6        | -3.443306 | 0.840277  | -1.540480 |
| 8        | -4.374542 | 1.185187  | -2.284730 |
| 6        | -0.752806 | -2.593260 | 1.804805  |
| 8        | -1.261469 | -2.389117 | -0.603383 |
| 6        | -0.310009 | -3.199633 | -1.306779 |
| 6        | 0.138149  | -2.457434 | -2.554059 |
| 7        | 0.906894  | -1.212317 | -2.287492 |
| 6        | 2.277858  | -1.528846 | -1.824737 |
| 6        | 2.922646  | -0.370402 | -1.100605 |
| 6        | 4.301150  | -0.135605 | -1.131609 |
| 6        | 4.823955  | 0.909517  | -0.372972 |
| 6        | 3.965459  | 1.697173  | 0.396405  |
| 6        | 2.604888  | 1.408250  | 0.368016  |
| 6        | 1.586444  | 2.208203  | 1.157289  |
| 8        | 1.975668  | 3.128640  | 1.893822  |
| 6        | 0.982331  | -0.413246 | -3.530087 |
| 8        | 0.354295  | 1.854609  | 0.992342  |
| 7        | 2.106168  | 0.397126  | -0.365374 |

|    |           |           |           |
|----|-----------|-----------|-----------|
| 8  | -2.206667 | 0.727331  | -1.897151 |
| 7  | -2.669679 | 0.207690  | 0.676285  |
| 1  | -0.019415 | -0.095176 | -3.827848 |
| 1  | 1.425689  | -0.996960 | -4.349849 |
| 1  | 1.598507  | 0.472246  | -3.363571 |
| 1  | 2.909365  | -1.851510 | -2.663836 |
| 1  | 2.229800  | -2.367887 | -1.123150 |
| 1  | -0.749942 | -2.175762 | -3.127497 |
| 1  | 0.726577  | -3.145140 | -3.179633 |
| 1  | -0.788488 | -4.139462 | -1.611957 |
| 1  | 0.533672  | -3.453672 | -0.654613 |
| 1  | 4.329984  | 2.520012  | 0.999249  |
| 1  | 5.890337  | 1.111708  | -0.383823 |
| 1  | 4.943603  | -0.761538 | -1.741529 |
| 1  | -5.864526 | 0.695292  | -0.271162 |
| 1  | -6.246319 | 0.010038  | 2.122999  |
| 1  | -4.266769 | -0.596327 | 3.523512  |
| 71 | -0.413184 | 0.277076  | -0.510922 |
| 7  | -0.529209 | -1.146609 | 2.037807  |
| 1  | -1.255825 | 0.449395  | 3.165310  |
| 1  | -1.933296 | -1.103284 | 3.647900  |
| 6  | 0.711630  | -0.978782 | 2.820303  |
| 1  | 1.549820  | -1.428184 | 2.283937  |
| 1  | 0.918549  | 0.082341  | 2.969908  |
| 1  | 0.640322  | -1.459471 | 3.808736  |
| 6  | -1.696404 | -2.929182 | 0.655283  |
| 1  | -1.780381 | -4.020115 | 0.578172  |
| 1  | -2.700076 | -2.535368 | 0.823221  |
| 1  | 0.223486  | -3.038630 | 1.593936  |
| 1  | -1.134931 | -3.080871 | 2.716747  |
| 8  | 0.048650  | 2.295714  | -1.826225 |
| 1  | 0.043323  | 3.029688  | -1.192232 |
| 1  | -0.797827 | 2.358484  | -2.300088 |

Output energies:

|                                              |                             |
|----------------------------------------------|-----------------------------|
| Zero-point correction=                       | 0.458884 (Hartree/Particle) |
| Thermal correction to Energy=                | 0.488684                    |
| Thermal correction to Enthalpy=              | 0.489628                    |
| Thermal correction to Gibbs Free Energy=     | 0.399653                    |
| Sum of electronic and zero-point Energies=   | -1487.881164                |
| Sum of electronic and thermal Energies=      | -1487.851364                |
| Sum of electronic and thermal Enthalpies=    | -1487.850420                |
| Sum of electronic and thermal Free Energies= | -1487.940394                |

(5) Lu-OxyMepa, N1<sup>S</sup>N2<sup>R</sup>( $\delta\delta$ ), enantiomer of N1<sup>R</sup>N2<sup>S</sup>( $\lambda\lambda$ )

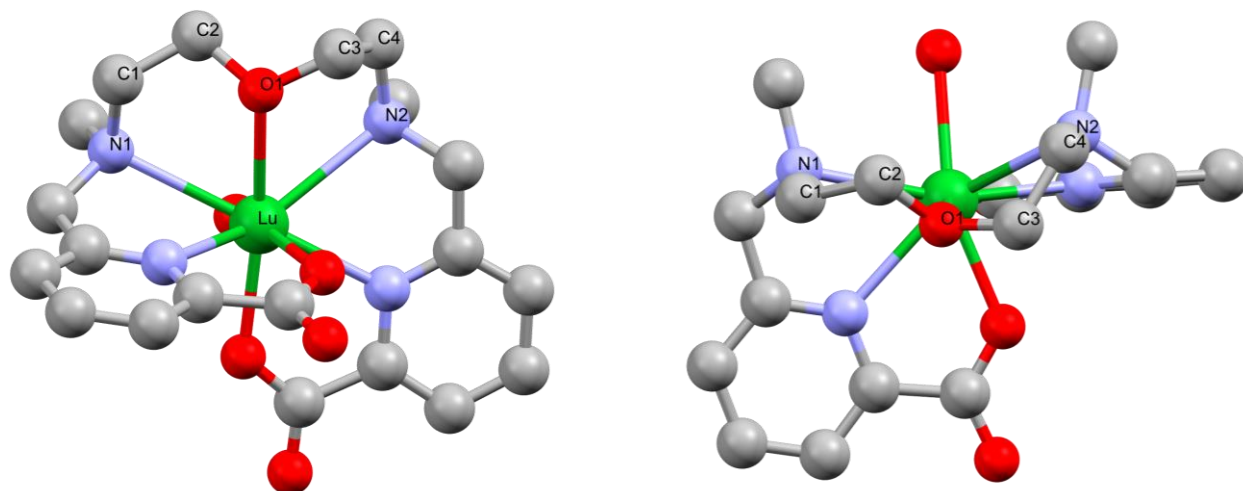

**Figure S94.** Side view (left) and top view (right) of optimized Lu-OxyMepa complex in N1<sup>S</sup>N2<sup>R</sup>( $\delta\delta$ ) conformation. Hydrogen atoms are omitted for clarity.

Optimized Cartesian coordinates in Å:

| Atomic # | x         | y         | z         |
|----------|-----------|-----------|-----------|
| 6        | 3.065152  | 1.757074  | -0.451147 |
| 6        | 3.495793  | 0.365611  | -0.046385 |
| 6        | 4.837810  | -0.025569 | -0.016526 |
| 6        | 5.157436  | -1.313949 | 0.406956  |
| 6        | 4.133773  | -2.182904 | 0.786078  |
| 6        | 2.821445  | -1.721493 | 0.729229  |
| 6        | 1.643793  | -2.584649 | 1.137488  |
| 8        | 1.844267  | -3.760027 | 1.483599  |
| 6        | 1.247688  | 3.097854  | -1.373124 |
| 8        | -0.631541 | 2.616528  | 0.118902  |
| 6        | -1.806557 | 2.800752  | -0.697698 |
| 6        | -2.911880 | 1.936474  | -0.124287 |
| 7        | -2.597509 | 0.484561  | -0.179186 |
| 6        | -3.374634 | -0.244851 | 0.846530  |
| 6        | -2.881213 | 0.064338  | 2.239698  |
| 6        | -3.725260 | 0.100910  | 3.353987  |
| 6        | -3.179095 | 0.383664  | 4.604385  |
| 6        | -1.811949 | 0.644149  | 4.712752  |
| 6        | -1.040083 | 0.598223  | 3.555994  |
| 6        | 0.441140  | 0.912647  | 3.550151  |
| 8        | 1.017838  | 1.156973  | 4.621965  |
| 6        | -2.925321 | -0.058547 | -1.511723 |
| 8        | 0.999787  | 0.913074  | 2.385057  |
| 7        | -1.567886 | 0.300177  | 2.356458  |

|    |           |           |           |
|----|-----------|-----------|-----------|
| 8  | 0.489449  | -2.005561 | 1.091483  |
| 7  | 2.518742  | -0.477488 | 0.319725  |
| 1  | -2.368605 | 0.476495  | -2.283431 |
| 1  | -2.653206 | -1.114699 | -1.555845 |
| 1  | -3.999560 | 0.037608  | -1.730963 |
| 1  | -4.449341 | -0.025094 | 0.771574  |
| 1  | -3.253150 | -1.318121 | 0.658573  |
| 1  | -3.064218 | 2.225341  | 0.918400  |
| 1  | -3.847651 | 2.149585  | -0.661947 |
| 1  | -2.108436 | 3.853535  | -0.655996 |
| 1  | -1.586087 | 2.545326  | -1.740155 |
| 1  | -1.348716 | 0.888298  | 5.661054  |
| 1  | -3.814864 | 0.417284  | 5.483524  |
| 1  | -4.787809 | -0.081351 | 3.233967  |
| 1  | 4.334176  | -3.194069 | 1.118681  |
| 1  | 6.192469  | -1.639451 | 0.434948  |
| 1  | 5.609711  | 0.670830  | -0.325810 |
| 71 | 0.085730  | 0.182419  | 0.392819  |
| 7  | 1.806722  | 1.732439  | -1.227889 |
| 1  | 3.871057  | 2.245884  | -1.017648 |
| 1  | 2.906270  | 2.347411  | 0.457601  |
| 6  | 2.082983  | 1.184359  | -2.572315 |
| 1  | 1.150194  | 1.064615  | -3.128009 |
| 1  | 2.575615  | 0.212702  | -2.491357 |
| 1  | 2.746977  | 1.847764  | -3.146615 |
| 6  | 0.447164  | 3.532202  | -0.157581 |
| 1  | 0.041652  | 4.537964  | -0.313487 |
| 1  | 1.058068  | 3.546156  | 0.748367  |
| 1  | 0.593919  | 3.095081  | -2.249340 |
| 1  | 2.040594  | 3.835682  | -1.568840 |
| 8  | 0.083465  | -1.240303 | -1.740306 |
| 1  | 0.101299  | -2.107365 | -1.304761 |
| 1  | 0.917750  | -1.197496 | -2.229789 |

Output energies:

|                                              |                             |
|----------------------------------------------|-----------------------------|
| Zero-point correction=                       | 0.457243 (Hartree/Particle) |
| Thermal correction to Energy=                | 0.486403                    |
| Thermal correction to Enthalpy=              | 0.487348                    |
| Thermal correction to Gibbs Free Energy=     | 0.396726                    |
| Sum of electronic and zero-point Energies=   | -1487.884527                |
| Sum of electronic and thermal Energies=      | -1487.855366                |
| Sum of electronic and thermal Enthalpies=    | -1487.854422                |
| Sum of electronic and thermal Free Energies= | -1487.945043                |

(6) Lu-OxyMepa,  $N1^S N2^R(\delta\lambda)$ , enantiomer of  $N1^R N2^S(\lambda\delta)$

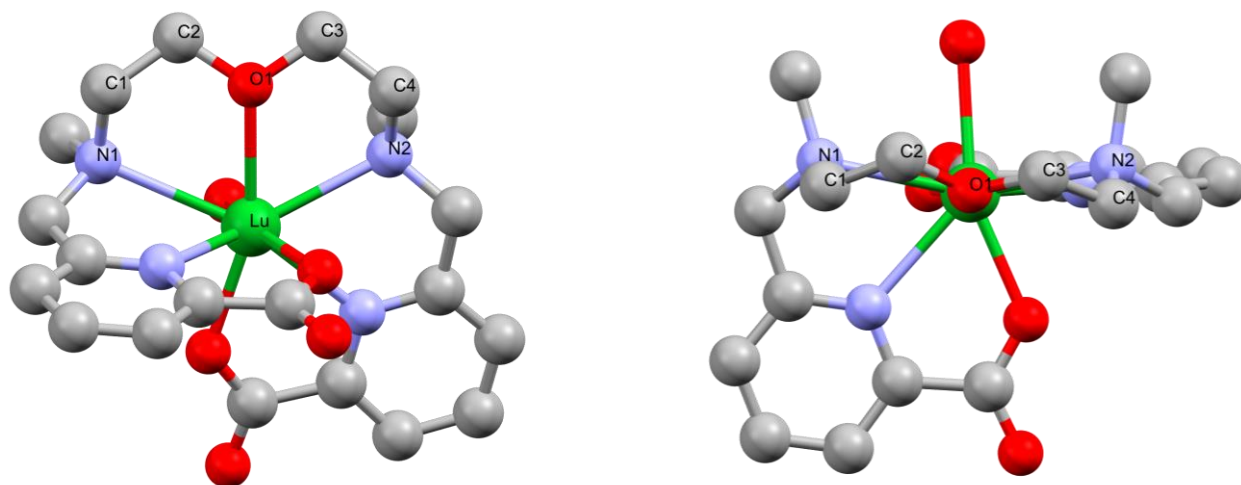

**Figure S95.** Side view (left) and top view (right) of optimized Lu-OxyMepa complex in  $N1^S N2^R(\delta\lambda)$  conformation. Hydrogen atoms are omitted for clarity.

Optimized Cartesian coordinates in Å:

| Atomic # | x         | y         | z         |
|----------|-----------|-----------|-----------|
| 6        | 3.303512  | 1.661250  | -0.200285 |
| 6        | 3.561649  | 0.198536  | 0.074006  |
| 6        | 4.847196  | -0.349566 | 0.117076  |
| 6        | 4.994593  | -1.695843 | 0.443410  |
| 6        | 3.862211  | -2.464653 | 0.718902  |
| 6        | 2.616362  | -1.847890 | 0.655810  |
| 6        | 1.325632  | -2.581050 | 0.968610  |
| 8        | 1.361493  | -3.799179 | 1.204417  |
| 6        | 1.549343  | 3.270702  | -0.673540 |
| 8        | -0.736773 | 2.548496  | -0.556865 |
| 6        | -2.069063 | 2.597003  | -1.106935 |
| 6        | -2.993665 | 1.749744  | -0.256523 |
| 7        | -2.592543 | 0.322691  | -0.195574 |
| 6        | -3.244254 | -0.337010 | 0.954170  |
| 6        | -2.675740 | 0.118562  | 2.277010  |
| 6        | -3.435110 | 0.115978  | 3.452018  |
| 6        | -2.836531 | 0.515764  | 4.643975  |
| 6        | -1.502410 | 0.926562  | 4.635034  |
| 6        | -0.816250 | 0.909777  | 3.425014  |
| 6        | 0.623350  | 1.360610  | 3.300568  |
| 8        | 1.232195  | 1.744374  | 4.312874  |
| 6        | -2.988859 | -0.375713 | -1.433709 |
| 8        | 1.115909  | 1.311461  | 2.108300  |
| 7        | -1.392904 | 0.505421  | 2.279339  |

|    |           |           |           |
|----|-----------|-----------|-----------|
| 8  | 0.259832  | -1.847987 | 0.975999  |
| 7  | 2.480389  | -0.548614 | 0.335890  |
| 1  | -2.533066 | 0.102557  | -2.301657 |
| 1  | -2.654211 | -1.414939 | -1.393441 |
| 1  | -4.081265 | -0.366257 | -1.567381 |
| 1  | -4.332604 | -0.178063 | 0.943917  |
| 1  | -3.080767 | -1.416682 | 0.856753  |
| 1  | -2.997268 | 2.155938  | 0.757594  |
| 1  | -4.016697 | 1.849083  | -0.650779 |
| 1  | -2.424816 | 3.633675  | -1.090016 |
| 1  | -2.035295 | 2.264499  | -2.151188 |
| 1  | -0.999745 | 1.258632  | 5.535258  |
| 1  | -3.406488 | 0.519543  | 5.567668  |
| 1  | -4.474907 | -0.191569 | 3.421844  |
| 1  | 3.933147  | -3.514023 | 0.978076  |
| 1  | 5.982897  | -2.142989 | 0.481247  |
| 1  | 5.708199  | 0.272197  | -0.103772 |
| 71 | 0.150218  | 0.346164  | 0.242671  |
| 7  | 1.987546  | 1.865174  | -0.845128 |
| 1  | 4.114280  | 2.085675  | -0.807623 |
| 1  | 3.305470  | 2.192460  | 0.756937  |
| 6  | 2.093875  | 1.515698  | -2.281205 |
| 6  | 0.143677  | 3.495577  | -1.190336 |
| 1  | 0.078263  | 3.375525  | -2.277411 |
| 1  | -0.178700 | 4.513419  | -0.941356 |
| 1  | 2.226396  | 3.965145  | -1.193170 |
| 1  | 1.584074  | 3.501991  | 0.394507  |
| 8  | 0.086561  | -0.938853 | -1.947781 |
| 1  | -0.377037 | -1.764541 | -1.739557 |
| 1  | 0.984946  | -1.216142 | -2.182573 |
| 1  | 2.523845  | 0.517618  | -2.386490 |
| 1  | 1.110397  | 1.514911  | -2.751952 |
| 1  | 2.741137  | 2.228459  | -2.811628 |

Output energies:

|                                              |                             |
|----------------------------------------------|-----------------------------|
| Zero-point correction=                       | 0.459308 (Hartree/Particle) |
| Thermal correction to Energy=                | 0.490090                    |
| Thermal correction to Enthalpy=              | 0.491034                    |
| Thermal correction to Gibbs Free Energy=     | 0.397404                    |
| Sum of electronic and zero-point Energies=   | -1487.891713                |
| Sum of electronic and thermal Energies=      | -1487.860932                |
| Sum of electronic and thermal Enthalpies=    | -1487.859987                |
| Sum of electronic and thermal Free Energies= | -1487.953618                |

(7) Lu-OxyMepa, N1<sup>S</sup>N2<sup>R</sup>(λδ), enantiomer of N1<sup>R</sup>N2<sup>S</sup>(δλ)

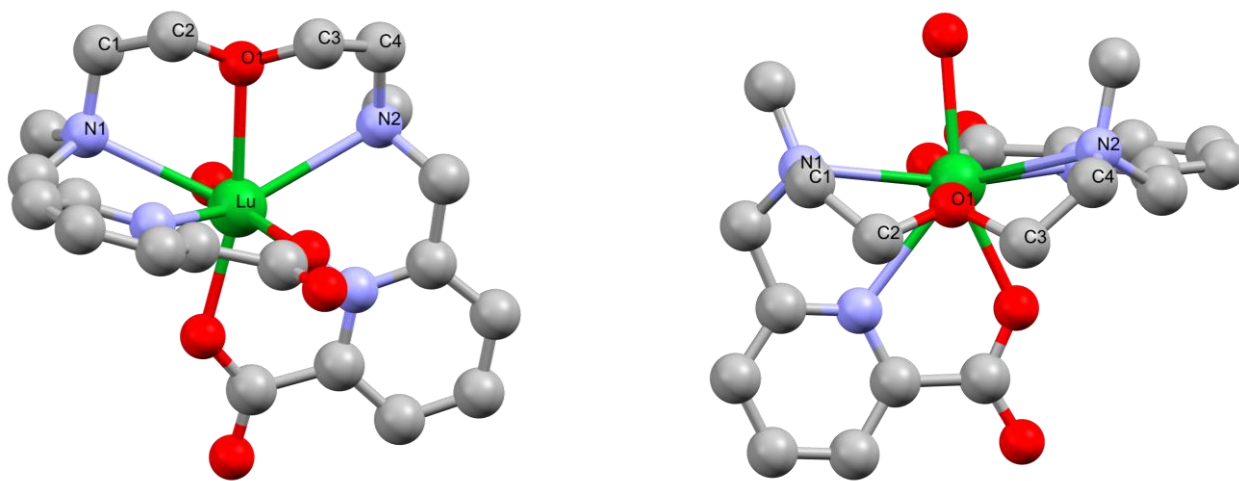

**Figure S96.** Side view (left) and top view (right) of optimized Lu-OxyMepa complex in N1<sup>S</sup>N2<sup>R</sup>(λδ) conformation. Hydrogen atoms are omitted for clarity.

Optimized Cartesian coordinates in Å:

| Atomic # | x         | y         | z         |
|----------|-----------|-----------|-----------|
| 6        | 3.125371  | 1.761589  | -0.193704 |
| 6        | 3.522254  | 0.322118  | 0.059056  |
| 6        | 4.856658  | -0.075642 | 0.188866  |
| 6        | 5.140860  | -1.407115 | 0.486930  |
| 6        | 4.091498  | -2.311447 | 0.654592  |
| 6        | 2.789192  | -1.842309 | 0.509235  |
| 6        | 1.580798  | -2.734148 | 0.720833  |
| 8        | 1.748946  | -3.946931 | 0.921048  |
| 6        | 1.329830  | 3.222163  | -1.031604 |
| 8        | -0.803245 | 2.331226  | -0.433200 |
| 6        | -2.164150 | 2.567834  | -0.017247 |
| 6        | -3.036311 | 1.503887  | -0.668946 |
| 7        | -2.665698 | 0.095159  | -0.349677 |
| 6        | -3.401843 | -0.415870 | 0.828231  |
| 6        | -2.877040 | 0.118631  | 2.133805  |
| 6        | -3.712784 | 0.408179  | 3.217238  |
| 6        | -3.144545 | 0.872015  | 4.401456  |
| 6        | -1.763495 | 1.056849  | 4.466500  |
| 6        | -1.003329 | 0.757332  | 3.338972  |
| 6        | 0.488856  | 0.999168  | 3.290550  |
| 8        | 1.076825  | 1.389578  | 4.314788  |
| 6        | -3.001230 | -0.771358 | -1.501002 |
| 8        | 1.045283  | 0.786632  | 2.148975  |
| 7        | -1.549547 | 0.276374  | 2.209088  |

|    |           |           |           |
|----|-----------|-----------|-----------|
| 8  | 0.434168  | -2.134134 | 0.689440  |
| 7  | 2.522634  | -0.560127 | 0.206257  |
| 1  | -2.489361 | -0.414790 | -2.395651 |
| 1  | -2.679116 | -1.795396 | -1.292793 |
| 1  | -4.083148 | -0.783960 | -1.702060 |
| 1  | -4.477884 | -0.208199 | 0.741251  |
| 1  | -3.286024 | -1.506014 | 0.843151  |
| 1  | -2.944632 | 1.629019  | -1.750922 |
| 1  | -4.085869 | 1.700972  | -0.407947 |
| 1  | -2.483172 | 3.550627  | -0.383715 |
| 1  | -2.225267 | 2.572119  | 1.075217  |
| 1  | -1.278671 | 1.439907  | 5.356187  |
| 1  | -3.771446 | 1.106372  | 5.256105  |
| 1  | -4.785582 | 0.279690  | 3.121665  |
| 1  | 4.264944  | -3.353277 | 0.895416  |
| 1  | 6.170051  | -1.736725 | 0.588278  |
| 1  | 5.651737  | 0.650155  | 0.055873  |
| 71 | 0.104334  | 0.065368  | 0.123302  |
| 7  | 1.915284  | 1.853364  | -1.032654 |
| 1  | 3.967592  | 2.304998  | -0.646340 |
| 1  | 2.914597  | 2.234182  | 0.771386  |
| 6  | 2.247307  | 1.454137  | -2.417275 |
| 1  | 1.342426  | 1.443178  | -3.027451 |
| 1  | 2.686992  | 0.453817  | -2.426378 |
| 1  | 2.971021  | 2.146379  | -2.872637 |
| 6  | 0.143755  | 3.367421  | -0.090872 |
| 1  | -0.319316 | 4.349094  | -0.238555 |
| 1  | 0.429282  | 3.265898  | 0.962310  |
| 1  | 0.983096  | 3.438147  | -2.045077 |
| 1  | 2.085094  | 3.978412  | -0.782046 |
| 8  | 0.089197  | -0.873947 | -2.152986 |
| 1  | -0.389534 | -1.716654 | -2.111667 |
| 1  | 0.990793  | -1.112601 | -2.417640 |

Output energies:

|                                              |                             |
|----------------------------------------------|-----------------------------|
| Zero-point correction=                       | 0.458094 (Hartree/Particle) |
| Thermal correction to Energy=                | 0.488274                    |
| Thermal correction to Enthalpy=              | 0.489218                    |
| Thermal correction to Gibbs Free Energy=     | 0.397146                    |
| Sum of electronic and zero-point Energies=   | -1487.879358                |
| Sum of electronic and thermal Energies=      | -1487.849178                |
| Sum of electronic and thermal Enthalpies=    | -1487.848234                |
| Sum of electronic and thermal Free Energies= | -1487.940306                |



(8) Lu-OxyMepa, N1<sup>S</sup>N2<sup>R</sup>( $\lambda\lambda$ ), enantiomer of N1<sup>R</sup>N2<sup>S</sup>( $\delta\delta$ )

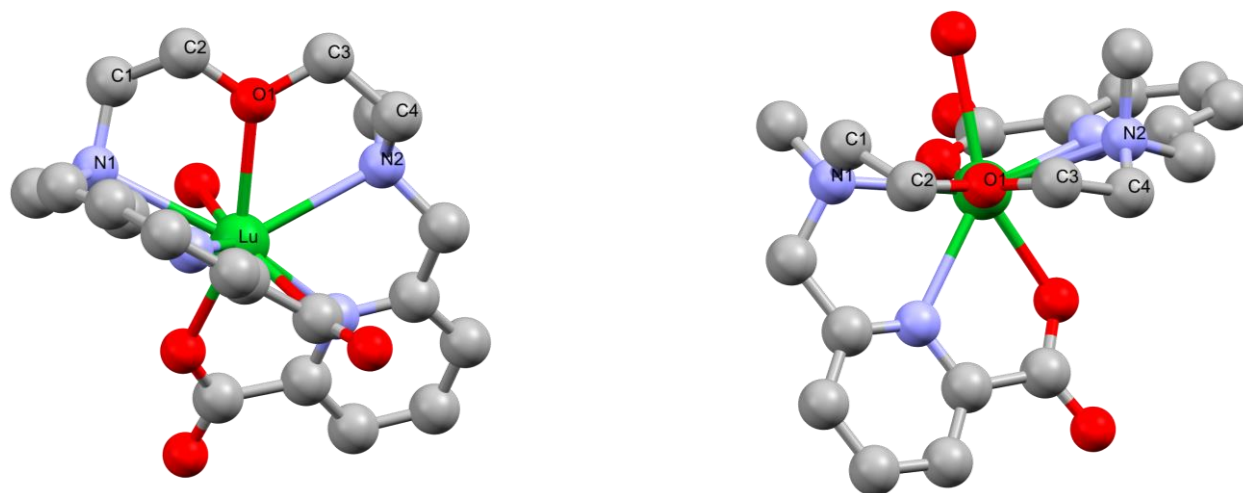

**Figure S97.** Side view (left) and top view (right) of optimized Lu-OxyMepa complex in N1<sup>S</sup>N2<sup>R</sup>( $\lambda\lambda$ ) conformation. Hydrogen atoms are omitted for clarity.

Optimized Cartesian coordinates in Å:

| Atomic # | x         | y         | z         |
|----------|-----------|-----------|-----------|
| 6        | 3.190278  | 1.642952  | 0.106385  |
| 6        | 3.547904  | 0.176810  | -0.000203 |
| 6        | 4.869625  | -0.265601 | -0.115633 |
| 6        | 5.127009  | -1.634812 | -0.117980 |
| 6        | 4.063002  | -2.531332 | -0.008672 |
| 6        | 2.774913  | -2.014779 | 0.098426  |
| 6        | 1.558124  | -2.905050 | 0.257105  |
| 8        | 1.697874  | -4.137645 | 0.225523  |
| 6        | 1.287748  | 3.156762  | 0.068596  |
| 8        | -0.888258 | 2.171286  | -0.262733 |
| 6        | -2.294146 | 2.310830  | -0.540900 |
| 6        | -2.809428 | 0.995371  | -1.089601 |
| 7        | -2.560178 | -0.161118 | -0.195156 |
| 6        | -3.444888 | -0.132157 | 0.991909  |
| 6        | -2.836552 | 0.517971  | 2.209076  |
| 6        | -3.643196 | 1.074891  | 3.209254  |
| 6        | -3.045053 | 1.570717  | 4.362818  |
| 6        | -1.656395 | 1.503809  | 4.492400  |
| 6        | -0.922499 | 0.948053  | 3.450816  |
| 6        | 0.586811  | 0.855505  | 3.493527  |
| 8        | 1.194229  | 1.249951  | 4.501163  |
| 6        | -2.810219 | -1.409918 | -0.952492 |
| 8        | 1.139134  | 0.351694  | 2.438948  |
| 7        | -1.502863 | 0.461838  | 2.335213  |

|    |           |           |           |
|----|-----------|-----------|-----------|
| 8  | 0.434860  | -2.285358 | 0.425189  |
| 7  | 2.531264  | -0.692375 | 0.096172  |
| 1  | -2.170730 | -1.439976 | -1.835204 |
| 1  | -2.582977 | -2.273349 | -0.323251 |
| 1  | -3.857601 | -1.481806 | -1.280632 |
| 1  | -4.408920 | 0.337270  | 0.756519  |
| 1  | -3.666966 | -1.168428 | 1.270317  |
| 1  | -2.301322 | 0.794855  | -2.036191 |
| 1  | -3.884409 | 1.098835  | -1.303305 |
| 1  | -2.440398 | 3.086561  | -1.299870 |
| 1  | -2.812885 | 2.623950  | 0.372637  |
| 1  | -1.143778 | 1.879127  | 5.369568  |
| 1  | -3.650707 | 2.008817  | 5.149814  |
| 1  | -4.718724 | 1.112355  | 3.072323  |
| 1  | 4.216662  | -3.603519 | -0.000024 |
| 1  | 6.145690  | -1.999751 | -0.203384 |
| 1  | 5.675214  | 0.456377  | -0.197318 |
| 71 | 0.113618  | -0.006899 | 0.419693  |
| 7  | 1.878042  | 1.928532  | -0.502656 |
| 1  | 3.986566  | 2.259680  | -0.333436 |
| 1  | 3.140183  | 1.896236  | 1.170898  |
| 6  | 2.017963  | 2.014360  | -1.967598 |
| 1  | 1.040752  | 2.052796  | -2.452183 |
| 1  | 2.551912  | 1.133701  | -2.333702 |
| 1  | 2.591143  | 2.906215  | -2.263121 |
| 6  | -0.135286 | 3.390529  | -0.410984 |
| 1  | -0.170812 | 3.696678  | -1.462593 |
| 1  | -0.590250 | 4.183974  | 0.192719  |
| 1  | 1.882503  | 4.050343  | -0.179300 |
| 1  | 1.289077  | 3.047408  | 1.157036  |
| 8  | 0.127184  | -0.658742 | -2.143688 |
| 1  | 0.198195  | -1.617819 | -2.019708 |
| 1  | 0.943951  | -0.410227 | -2.599918 |

Output energies:

|                                              |                             |
|----------------------------------------------|-----------------------------|
| Zero-point correction=                       | 0.458919 (Hartree/Particle) |
| Thermal correction to Energy=                | 0.489824                    |
| Thermal correction to Enthalpy=              | 0.490768                    |
| Thermal correction to Gibbs Free Energy=     | 0.397774                    |
| Sum of electronic and zero-point Energies=   | -1487.884930                |
| Sum of electronic and thermal Energies=      | -1487.854025                |
| Sum of electronic and thermal Enthalpies=    | -1487.853081                |
| Sum of electronic and thermal Free Energies= | -1487.946075                |

(9a) La-OxyMepa,  $N1^S N2^S(\delta\delta)$ , enantiomer of  $N1^R N2^R(\lambda\lambda)$ ,  $q = 1$

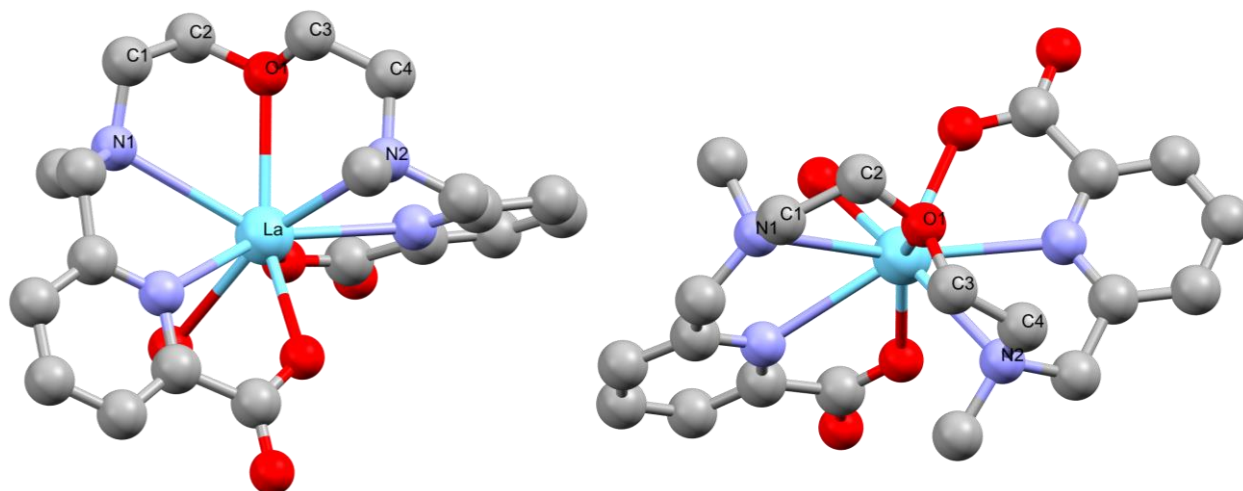

**Figure S98.** Side view (left) and top view (right) of optimized La-OxyMepa complex in  $N1^S N2^S(\delta\delta)$  conformation ( $q = 1$ ). Hydrogen atoms are omitted for clarity.

Optimized Cartesian coordinates in Å:

| Atomic # | x         | y         | z         |
|----------|-----------|-----------|-----------|
| 6        | -1.821267 | -0.636037 | 2.833111  |
| 6        | -3.044348 | -0.082457 | 2.137118  |
| 6        | -4.292351 | -0.030043 | 2.765652  |
| 6        | -5.365600 | 0.546018  | 2.089804  |
| 6        | -5.170007 | 1.049571  | 0.804299  |
| 6        | -3.900313 | 0.952315  | 0.239446  |
| 6        | -3.620324 | 1.471960  | -1.159290 |
| 8        | -4.530061 | 2.055438  | -1.773663 |
| 6        | -1.553490 | -2.669722 | 1.539965  |
| 8        | -1.100607 | -2.436614 | -0.806281 |
| 6        | -0.649795 | -2.979230 | -2.064379 |
| 6        | 0.862498  | -2.894968 | -2.219396 |
| 7        | 1.358152  | -1.503544 | -2.157775 |
| 6        | 2.768620  | -1.459548 | -1.738728 |
| 6        | 3.201697  | -0.114012 | -1.197092 |
| 6        | 4.497774  | 0.362528  | -1.424393 |
| 6        | 4.902258  | 1.547540  | -0.816034 |
| 6        | 4.004517  | 2.227114  | 0.005556  |
| 6        | 2.725529  | 1.699306  | 0.173364  |
| 6        | 1.711885  | 2.399768  | 1.066192  |
| 8        | 2.055594  | 3.441657  | 1.653221  |
| 6        | 1.197183  | -0.824830 | -3.457891 |
| 8        | 0.550575  | 1.848070  | 1.155408  |
| 7        | 2.332783  | 0.554996  | -0.420068 |

|    |           |           |           |
|----|-----------|-----------|-----------|
| 8  | -2.430683 | 1.261903  | -1.612254 |
| 7  | -2.863600 | 0.400852  | 0.897300  |
| 1  | 1.146999  | -3.381800 | -3.165842 |
| 1  | 1.335921  | -3.465230 | -1.416144 |
| 1  | -0.975252 | -4.022566 | -2.149396 |
| 1  | -1.164633 | -2.397260 | -2.832891 |
| 1  | 4.273820  | 3.148371  | 0.507023  |
| 1  | 5.903145  | 1.935193  | -0.978469 |
| 1  | 5.171471  | -0.195767 | -2.065753 |
| 1  | -5.974617 | 1.503290  | 0.238798  |
| 1  | -6.344061 | 0.596472  | 2.556957  |
| 1  | -4.412030 | -0.437813 | 3.763666  |
| 57 | -0.458812 | 0.182603  | -0.412444 |
| 7  | -0.932650 | -1.375528 | 1.911247  |
| 1  | -1.249035 | 0.204322  | 3.243119  |
| 1  | -2.126937 | -1.263084 | 3.683121  |
| 6  | 0.384934  | -1.571991 | 2.545897  |
| 1  | 1.053055  | -2.109472 | 1.869164  |
| 1  | 0.830356  | -0.597998 | 2.763557  |
| 1  | 0.306293  | -2.143091 | 3.483190  |
| 6  | -0.926420 | -3.316410 | 0.320248  |
| 1  | 0.137029  | -3.527105 | 0.476443  |
| 1  | -1.436704 | -4.266028 | 0.118026  |
| 1  | -1.497647 | -3.380156 | 2.379323  |
| 1  | -2.612485 | -2.493157 | 1.332317  |
| 8  | 0.036851  | 2.292802  | -2.127072 |
| 1  | 0.320767  | 3.022786  | -1.556201 |
| 1  | -0.929805 | 2.399862  | -2.211378 |
| 1  | 1.747496  | -1.347333 | -4.256432 |
| 1  | 1.573779  | 0.198295  | -3.393435 |
| 1  | 0.141405  | -0.781086 | -3.737332 |
| 1  | 2.907678  | -2.189039 | -0.932419 |
| 1  | 3.443243  | -1.757921 | -2.555189 |

Output energies:

|                                              |                             |
|----------------------------------------------|-----------------------------|
| Zero-point correction=                       | 0.455640 (Hartree/Particle) |
| Thermal correction to Energy=                | 0.485047                    |
| Thermal correction to Enthalpy=              | 0.485991                    |
| Thermal correction to Gibbs Free Energy=     | 0.393968                    |
| Sum of electronic and zero-point Energies=   | -1479.552134                |
| Sum of electronic and thermal Energies=      | -1479.522727                |
| Sum of electronic and thermal Enthalpies=    | -1479.521783                |
| Sum of electronic and thermal Free Energies= | -1479.613806                |

(9b) La-OxyMepa, N1<sup>S</sup>N2<sup>S</sup>( $\delta\delta$ ), enantiomer of N1<sup>R</sup>N2<sup>R</sup>( $\lambda\lambda$ ),  $q = 2$

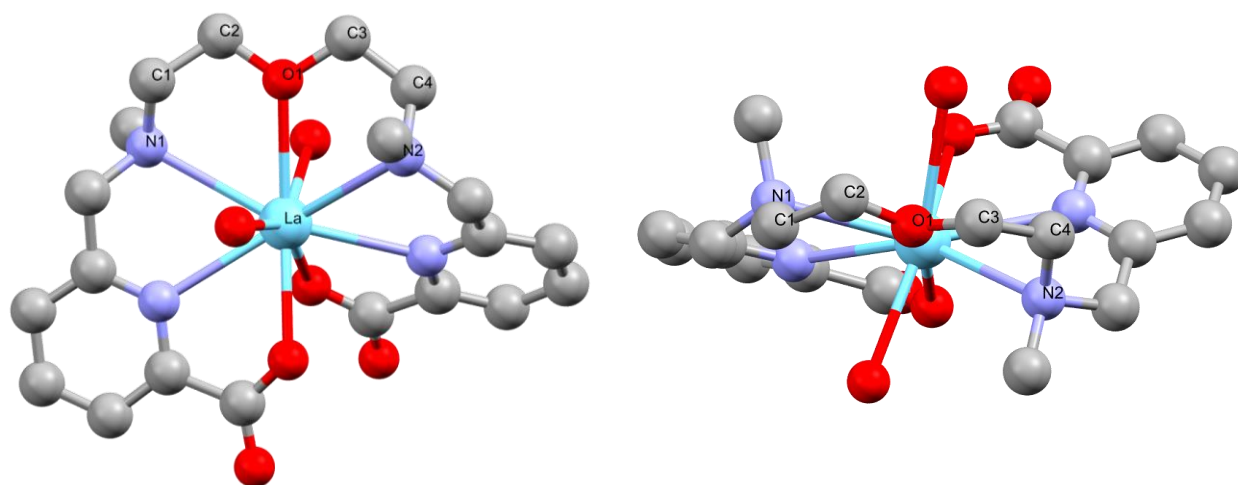

**Figure S99.** Side view (left) and top view (right) of optimized La-OxyMepa complex in N1<sup>S</sup>N2<sup>S</sup>( $\delta\delta$ ) conformation ( $q = 2$ ). Hydrogen atoms are omitted for clarity.

Optimized Cartesian coordinates in Å:

| Atomic # | x        | y         | z         |
|----------|----------|-----------|-----------|
| 57       | 2.435159 | 0.552024  | 9.238560  |
| 8        | 2.956010 | -2.085362 | 8.833279  |
| 8        | 4.916065 | 0.180610  | 7.921239  |
| 8        | 0.444277 | -0.565922 | 10.731628 |
| 8        | 1.110439 | 2.657093  | 9.839232  |
| 8        | 3.886044 | 2.601800  | 8.505168  |
| 8        | 1.326464 | 4.746307  | 10.657084 |
| 8        | 4.123891 | 4.489368  | 7.305927  |
| 7        | 3.999996 | -0.871578 | 11.291348 |
| 7        | 0.958427 | -0.958255 | 7.228597  |
| 7        | 2.697985 | 1.653518  | 11.745689 |
| 7        | 2.045483 | 1.661641  | 6.724646  |
| 6        | 3.705713 | -2.312713 | 11.117443 |
| 1        | 2.671912 | -2.480157 | 11.434968 |
| 1        | 4.353313 | -2.930651 | 11.760532 |
| 6        | 3.848346 | -2.815786 | 9.690700  |
| 1        | 4.872720 | -2.726534 | 9.309799  |
| 1        | 3.576412 | -3.878427 | 9.678008  |
| 6        | 2.715672 | -2.727379 | 7.571766  |
| 1        | 2.098117 | -3.617478 | 7.741723  |
| 1        | 3.664676 | -3.055199 | 7.130361  |
| 6        | 2.047888 | -1.750400 | 6.608869  |
| 1        | 2.794714 | -1.048844 | 6.227051  |
| 1        | 1.672737 | -2.330183 | 5.750253  |

|   |           |           |           |
|---|-----------|-----------|-----------|
| 6 | 5.439127  | -0.586252 | 11.135217 |
| 6 | -0.102707 | -1.844657 | 7.746133  |
| 6 | 3.559817  | -0.434769 | 12.632550 |
| 1 | 4.251133  | -0.785348 | 13.412560 |
| 1 | 2.586966  | -0.895538 | 12.838449 |
| 6 | 3.379050  | 1.062929  | 12.741523 |
| 6 | 3.806338  | 1.787926  | 13.857712 |
| 1 | 4.357919  | 1.290096  | 14.647948 |
| 6 | 3.508191  | 3.147861  | 13.934201 |
| 1 | 3.834012  | 3.731633  | 14.789490 |
| 6 | 2.780953  | 3.747140  | 12.906351 |
| 1 | 2.516020  | 4.797148  | 12.930367 |
| 6 | 2.388112  | 2.959402  | 11.825467 |
| 6 | 1.547747  | 3.520991  | 10.686724 |
| 6 | 0.360978  | -0.050749 | 6.228093  |
| 1 | -0.546892 | 0.373524  | 6.673560  |
| 1 | 0.042744  | -0.607263 | 5.333792  |
| 6 | 1.238908  | 1.106152  | 5.805125  |
| 6 | 1.137227  | 1.628290  | 4.510393  |
| 1 | 0.493764  | 1.143844  | 3.783785  |
| 6 | 1.862134  | 2.769153  | 4.180395  |
| 1 | 1.794975  | 3.193113  | 3.183392  |
| 6 | 2.676537  | 3.357649  | 5.147066  |
| 1 | 3.253924  | 4.250383  | 4.940761  |
| 6 | 2.753568  | 2.763952  | 6.405051  |
| 6 | 3.655726  | 3.350996  | 7.479449  |
| 1 | -0.525804 | -2.477151 | 6.950740  |
| 1 | -0.907989 | -1.241597 | 8.170816  |
| 1 | 0.290553  | -2.494366 | 8.529132  |
| 1 | 0.511461  | -1.529274 | 10.649005 |
| 1 | 4.664610  | -0.043675 | 7.012921  |
| 1 | 5.789950  | -0.892326 | 10.150203 |
| 1 | 6.034947  | -1.109024 | 11.899600 |
| 1 | 5.613822  | 0.488371  | 11.236886 |
| 1 | 4.859971  | 1.158574  | 7.956189  |
| 1 | 0.622146  | -0.386743 | 11.667125 |

Output energies:

|                                              |                             |
|----------------------------------------------|-----------------------------|
| Zero-point correction=                       | 0.481778 (Hartree/Particle) |
| Thermal correction to Energy=                | 0.514549                    |
| Thermal correction to Enthalpy=              | 0.515494                    |
| Thermal correction to Gibbs Free Energy=     | 0.418119                    |
| Sum of electronic and zero-point Energies=   | -1555.962532                |
| Sum of electronic and thermal Energies=      | -1555.929760                |
| Sum of electronic and thermal Enthalpies=    | -1555.928816                |
| Sum of electronic and thermal Free Energies= | -1556.026191                |

(10a) La-OxyMepa,  $N1^S N2^S(\delta\lambda)$ , enantiomer of  $N1^R N2^R(\lambda\delta)$ ,  $q = 1$

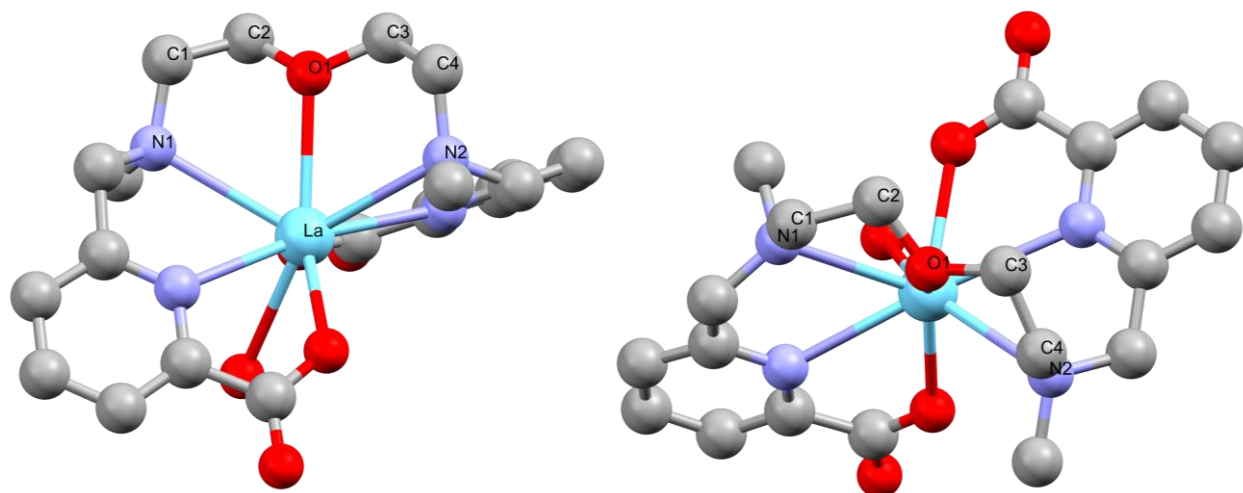

**Figure S100.** Side view (left) and top view (right) of optimized La-OxyMepa complex in  $N1^S N2^S(\delta\lambda)$  conformation ( $q = 1$ ). Hydrogen atoms are omitted for clarity.

Optimized Cartesian coordinates in Å:

| Atomic # | x         | y         | z         |
|----------|-----------|-----------|-----------|
| 6        | -2.112946 | -0.773760 | 2.909099  |
| 6        | -3.161956 | -0.370492 | 1.899219  |
| 6        | -4.525904 | -0.479608 | 2.188219  |
| 6        | -5.453647 | -0.012984 | 1.260382  |
| 6        | -4.997795 | 0.539441  | 0.064664  |
| 6        | -3.623088 | 0.597570  | -0.159733 |
| 6        | -3.070124 | 1.156995  | -1.458622 |
| 8        | -3.859255 | 1.673107  | -2.269999 |
| 6        | -1.206516 | -2.843964 | 1.933631  |
| 8        | -0.589688 | -2.505545 | -0.346373 |
| 6        | -0.698321 | -2.831764 | -1.746258 |
| 6        | 0.683592  | -2.675209 | -2.355635 |
| 7        | 1.214005  | -1.289684 | -2.248145 |
| 6        | 2.692139  | -1.305087 | -2.186253 |
| 6        | 3.294455  | -0.048254 | -1.597825 |
| 6        | 4.494744  | 0.481056  | -2.083203 |
| 6        | 5.064716  | 1.572683  | -1.432104 |
| 6        | 4.423347  | 2.112430  | -0.317748 |
| 6        | 3.221428  | 1.542430  | 0.097134  |
| 6        | 2.455141  | 2.098039  | 1.288987  |
| 8        | 2.928140  | 3.076039  | 1.895650  |
| 6        | 0.766793  | -0.483855 | -3.404544 |
| 8        | 1.351488  | 1.500266  | 1.585796  |
| 7        | 2.676829  | 0.483768  | -0.530092 |

|    |           |           |           |
|----|-----------|-----------|-----------|
| 8  | -1.797809 | 1.043944  | -1.630511 |
| 7  | -2.727035 | 0.159806  | 0.744107  |
| 1  | 0.653261  | -3.005979 | -3.403729 |
| 1  | 1.358908  | -3.346846 | -1.819615 |
| 1  | -1.024395 | -3.872231 | -1.856930 |
| 1  | -1.444118 | -2.180854 | -2.220196 |
| 1  | 4.828324  | 2.960973  | 0.219605  |
| 1  | 5.996064  | 1.999818  | -1.790519 |
| 1  | 4.968456  | 0.039055  | -2.953184 |
| 1  | -5.679225 | 0.912557  | -0.689997 |
| 1  | -6.517480 | -0.084596 | 1.464119  |
| 1  | -4.844913 | -0.923506 | 3.125137  |
| 57 | -0.017027 | 0.131732  | -0.006680 |
| 7  | -0.927847 | -1.435981 | 2.324958  |
| 1  | -1.766335 | 0.142564  | 3.401708  |
| 1  | -2.571913 | -1.399373 | 3.688273  |
| 6  | 0.174156  | -1.400586 | 3.309971  |
| 1  | 1.078534  | -1.822133 | 2.863991  |
| 1  | 0.378527  | -0.366433 | 3.596710  |
| 1  | -0.064175 | -1.972445 | 4.219643  |
| 6  | -1.642317 | -3.023819 | 0.488357  |
| 1  | -0.284270 | -3.414976 | 2.070572  |
| 1  | -1.964666 | -3.290418 | 2.592810  |
| 8  | 0.310304  | 2.690971  | -1.140614 |
| 1  | 0.193773  | 3.303262  | -0.399143 |
| 1  | -0.585466 | 2.552045  | -1.503626 |
| 1  | 1.177385  | -0.877763 | -4.346480 |
| 1  | 1.095288  | 0.552602  | -3.290124 |
| 1  | -0.322921 | -0.494593 | -3.468076 |
| 1  | 2.993767  | -2.134836 | -1.537064 |
| 1  | 3.130237  | -1.499359 | -3.175626 |
| 1  | -1.769388 | -4.094618 | 0.288471  |
| 1  | -2.586252 | -2.516699 | 0.260785  |

Output energies:

|                                              |                             |
|----------------------------------------------|-----------------------------|
| Zero-point correction=                       | 0.456009 (Hartree/Particle) |
| Thermal correction to Energy=                | 0.485270                    |
| Thermal correction to Enthalpy=              | 0.486214                    |
| Thermal correction to Gibbs Free Energy=     | 0.396161                    |
| Sum of electronic and zero-point Energies=   | -1479.547950                |
| Sum of electronic and thermal Energies=      | -1479.518688                |
| Sum of electronic and thermal Enthalpies=    | -1479.517744                |
| Sum of electronic and thermal Free Energies= | -1479.607798                |



(10b) La-OxyMepa,  $N1^S N2^S(\delta\lambda)$ , enantiomer of  $N1^R N2^R(\lambda\delta)$ ,  $q = 2$

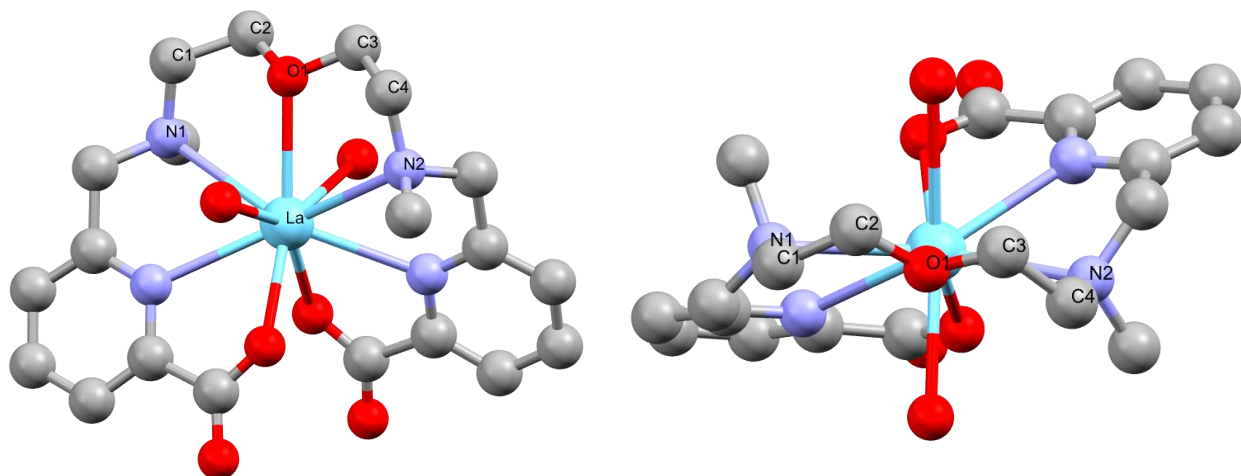

**Figure S101.** Side view (left) and top view (right) of optimized La-OxyMepa complex in  $N1^S N2^S(\delta\lambda)$  conformation ( $q = 2$ ). Hydrogen atoms are omitted for clarity.

Optimized Cartesian coordinates in Å:

| Atomic # | x        | y         | z         |
|----------|----------|-----------|-----------|
| 57       | 2.490293 | 0.395485  | 9.249762  |
| 8        | 2.808268 | -2.316936 | 9.073092  |
| 8        | 4.870445 | 0.045624  | 7.563491  |
| 8        | 0.507843 | -0.761119 | 10.731985 |
| 8        | 0.886498 | 2.197435  | 9.979600  |
| 8        | 3.760404 | 2.580280  | 8.671780  |
| 8        | 0.671339 | 4.214170  | 10.958994 |
| 8        | 3.601672 | 4.633360  | 7.756916  |
| 7        | 4.319119 | -0.865661 | 11.146335 |
| 7        | 0.894987 | -0.955555 | 7.251601  |
| 7        | 2.719977 | 1.424551  | 11.779389 |
| 7        | 2.228066 | 1.518514  | 6.738161  |
| 6        | 4.275961 | -2.339058 | 10.981682 |
| 1        | 3.436712 | -2.721556 | 11.569266 |
| 1        | 5.191855 | -2.807879 | 11.373169 |
| 6        | 4.083602 | -2.791891 | 9.544227  |
| 1        | 4.878859 | -2.433134 | 8.880610  |
| 1        | 4.089121 | -3.888582 | 9.521230  |
| 6        | 2.421734 | -2.878695 | 7.805953  |
| 1        | 2.424468 | -3.973219 | 7.881907  |
| 1        | 3.150484 | -2.592295 | 7.036725  |
| 6        | 1.012886 | -2.417335 | 7.470974  |
| 1        | 0.661539 | -2.976703 | 6.590419  |
| 1        | 0.355370 | -2.684396 | 8.303635  |

|   |           |           |           |
|---|-----------|-----------|-----------|
| 6 | 5.645680  | -0.327700 | 10.783702 |
| 6 | -0.508736 | -0.525093 | 7.413099  |
| 6 | 4.002230  | -0.493643 | 12.540974 |
| 1 | 4.844677  | -0.709647 | 13.213798 |
| 1 | 3.159695  | -1.110445 | 12.873467 |
| 6 | 3.578994  | 0.950291  | 12.696056 |
| 6 | 3.972190  | 1.725604  | 13.791119 |
| 1 | 4.674276  | 1.324652  | 14.514343 |
| 6 | 3.444068  | 3.007506  | 13.935099 |
| 1 | 3.737778  | 3.628715  | 14.775522 |
| 6 | 2.528391  | 3.479924  | 12.995234 |
| 1 | 2.080845  | 4.462681  | 13.078073 |
| 6 | 2.190319  | 2.652419  | 11.925956 |
| 6 | 1.170108  | 3.076598  | 10.878074 |
| 6 | 1.364795  | -0.591989 | 5.897493  |
| 1 | 0.660350  | -0.947753 | 5.131658  |
| 1 | 2.318870  | -1.098550 | 5.713877  |
| 6 | 1.602011  | 0.892886  | 5.728980  |
| 6 | 1.268862  | 1.568407  | 4.550750  |
| 1 | 0.758742  | 1.042743  | 3.750722  |
| 6 | 1.607565  | 2.914693  | 4.426642  |
| 1 | 1.356532  | 3.460424  | 3.522392  |
| 6 | 2.279331  | 3.550020  | 5.470855  |
| 1 | 2.576468  | 4.589892  | 5.410938  |
| 6 | 2.578407  | 2.810597  | 6.613834  |
| 6 | 3.367974  | 3.410439  | 7.768302  |
| 1 | 5.908246  | -0.621401 | 9.767457  |
| 1 | 6.425641  | -0.692748 | 11.469287 |
| 1 | 5.627336  | 0.765130  | 10.826043 |
| 1 | 4.494094  | -0.070330 | 6.678411  |
| 1 | 0.116743  | -1.532270 | 10.296049 |
| 1 | -1.172729 | -1.029732 | 6.694995  |
| 1 | -0.586035 | 0.553261  | 7.253526  |
| 1 | -0.852761 | -0.748036 | 8.424569  |
| 1 | -0.200791 | -0.100014 | 10.755302 |
| 1 | 4.951184  | 1.010324  | 7.663554  |

Output energies:

|                                              |                             |
|----------------------------------------------|-----------------------------|
| Zero-point correction=                       | 0.479600 (Hartree/Particle) |
| Thermal correction to Energy=                | 0.510650                    |
| Thermal correction to Enthalpy=              | 0.511594                    |
| Thermal correction to Gibbs Free Energy=     | 0.418911                    |
| Sum of electronic and zero-point Energies=   | -1555.967112                |
| Sum of electronic and thermal Energies=      | -1555.936062                |
| Sum of electronic and thermal Enthalpies=    | -1555.935118                |
| Sum of electronic and thermal Free Energies= | -1556.027801                |

(11a) La-OxyMepa,  $N1^S N2^S(\lambda\delta)$ , enantiomer of  $N1^R N2^R(\delta\lambda)$ ,  $q = 1$

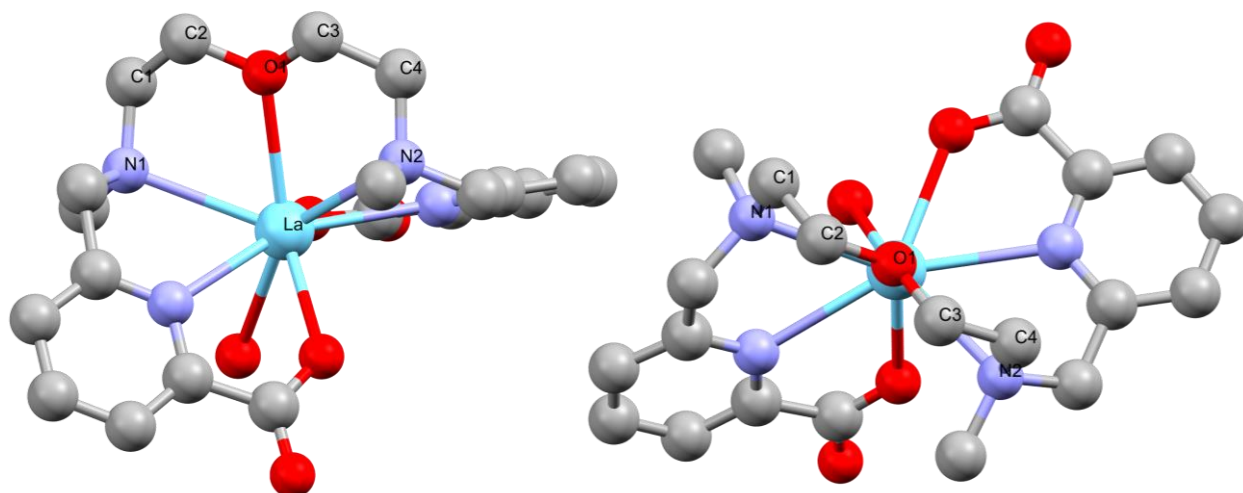

**Figure S102.** Side view (left) and top view (right) of optimized La-OxyMepa complex in  $N1^S N2^S(\lambda\delta)$  conformation ( $q = 1$ ). Hydrogen atoms are omitted for clarity.

Optimized Cartesian coordinates in Å:

| Atomic # | x         | y         | z         |
|----------|-----------|-----------|-----------|
| 6        | -1.906492 | -0.497566 | 2.854411  |
| 6        | -3.092775 | 0.005054  | 2.061352  |
| 6        | -4.353095 | 0.156652  | 2.649331  |
| 6        | -5.395630 | 0.677406  | 1.886986  |
| 6        | -5.162919 | 1.012302  | 0.553072  |
| 6        | -3.885351 | 0.819552  | 0.032936  |
| 6        | -3.574272 | 1.126480  | -1.422299 |
| 8        | -4.464902 | 1.629516  | -2.129603 |
| 6        | -1.557773 | -2.603282 | 1.703533  |
| 8        | -0.582807 | -2.635779 | -0.506522 |
| 6        | 0.156771  | -3.353872 | -1.508216 |
| 6        | 0.368472  | -2.466253 | -2.720441 |
| 7        | 1.073963  | -1.196002 | -2.427504 |
| 6        | 2.485322  | -1.427806 | -2.051673 |
| 6        | 3.113048  | -0.231568 | -1.371424 |
| 6        | 4.451230  | 0.118601  | -1.576537 |
| 6        | 4.985993  | 1.186468  | -0.858669 |
| 6        | 4.175991  | 1.880818  | 0.040129  |
| 6        | 2.850072  | 1.477773  | 0.184812  |
| 6        | 1.901177  | 2.183330  | 1.141877  |
| 8        | 2.326912  | 3.152333  | 1.796744  |
| 6        | 1.008226  | -0.317086 | -3.613142 |
| 8        | 0.705014  | 1.709619  | 1.204287  |
| 7        | 2.339805  | 0.442913  | -0.505771 |

|    |           |           |           |
|----|-----------|-----------|-----------|
| 8  | -2.384435 | 0.828515  | -1.823869 |
| 7  | -2.872724 | 0.340155  | 0.780370  |
| 1  | -0.607153 | -2.203260 | -3.141449 |
| 1  | 0.905581  | -3.051247 | -3.483402 |
| 1  | 1.103196  | -3.700471 | -1.076138 |
| 1  | -0.411279 | -4.240601 | -1.816758 |
| 1  | 4.549471  | 2.718518  | 0.616272  |
| 1  | 6.022127  | 1.476917  | -1.001646 |
| 1  | 5.054175  | -0.437629 | -2.286306 |
| 1  | -5.946149 | 1.406805  | -0.082530 |
| 1  | -6.381251 | 0.808730  | 2.322494  |
| 1  | -4.505097 | -0.131891 | 3.683895  |
| 57 | -0.391136 | 0.091885  | -0.378533 |
| 7  | -0.957945 | -1.292248 | 2.044488  |
| 1  | -1.362403 | 0.371660  | 3.241712  |
| 1  | -2.260798 | -1.067306 | 3.725872  |
| 6  | 0.305975  | -1.454167 | 2.790363  |
| 1  | 1.045517  | -1.972739 | 2.176683  |
| 1  | 0.705740  | -0.469274 | 3.041435  |
| 1  | 0.161149  | -2.025475 | 3.719645  |
| 6  | -0.753035 | -3.403261 | 0.697342  |
| 1  | 0.232334  | -3.685119 | 1.087194  |
| 1  | -1.299772 | -4.326151 | 0.466714  |
| 1  | -1.677426 | -3.220078 | 2.608369  |
| 1  | -2.556180 | -2.424611 | 1.295254  |
| 8  | -0.205670 | 2.484065  | -1.727839 |
| 1  | -0.218060 | 3.178484  | -1.051930 |
| 1  | -1.138482 | 2.358445  | -1.986679 |
| 1  | 1.454062  | -0.799532 | -4.495882 |
| 1  | 1.548285  | 0.612048  | -3.419208 |
| 1  | -0.034399 | -0.076412 | -3.836816 |
| 1  | 2.526347  | -2.260770 | -1.342542 |
| 1  | 3.083277  | -1.721915 | -2.926082 |

Output energies:

|                                              |                             |
|----------------------------------------------|-----------------------------|
| Zero-point correction=                       | 0.455454 (Hartree/Particle) |
| Thermal correction to Energy=                | 0.484974                    |
| Thermal correction to Enthalpy=              | 0.485918                    |
| Thermal correction to Gibbs Free Energy=     | 0.395074                    |
| Sum of electronic and zero-point Energies=   | -1479.553394                |
| Sum of electronic and thermal Energies=      | -1479.523875                |
| Sum of electronic and thermal Enthalpies=    | -1479.522931                |
| Sum of electronic and thermal Free Energies= | -1479.613774                |

(11b) La-OxyMepa,  $N1^S N2^S(\lambda\delta)$ , enantiomer of  $N1^R N2^R(\delta\lambda)$ ,  $q = 2$

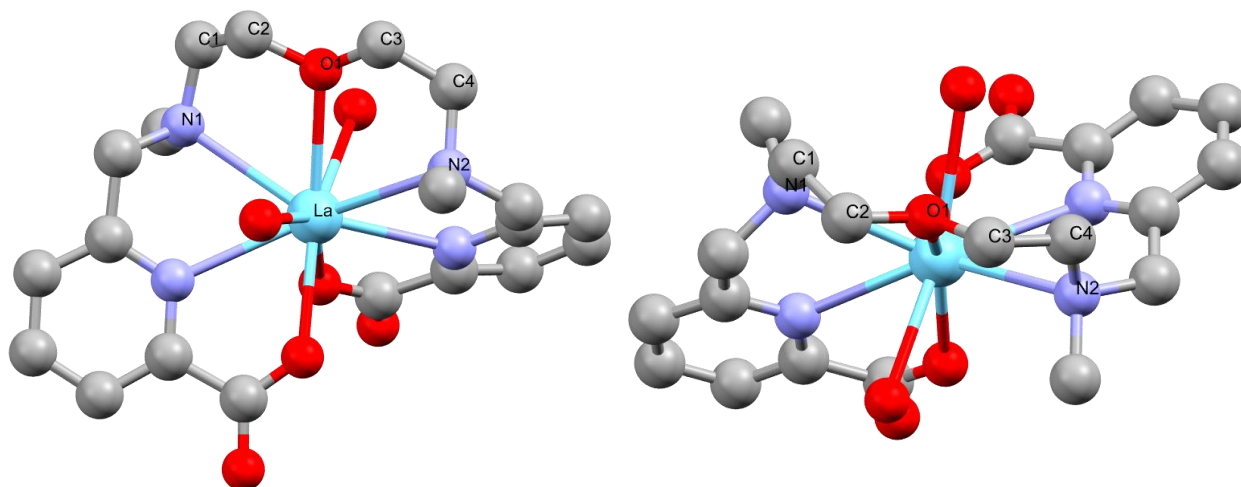

**Figure S103.** Side view (left) and top view (right) of optimized La-OxyMepa complex in  $N1^S N2^S(\lambda\delta)$  conformation ( $q = 2$ ). Hydrogen atoms are omitted for clarity.

Optimized Cartesian coordinates in Å:

| Atomic # | x        | y         | z         |
|----------|----------|-----------|-----------|
| 57       | 2.412930 | 0.608941  | 9.167204  |
| 8        | 3.001647 | -1.995892 | 8.801227  |
| 8        | 4.690026 | 0.062843  | 7.471903  |
| 8        | 0.647868 | -0.683313 | 10.908664 |
| 8        | 0.852337 | 2.433822  | 10.038480 |
| 8        | 3.603258 | 2.786072  | 8.592146  |
| 8        | 0.503164 | 4.257664  | 11.313311 |
| 8        | 4.358904 | 4.370833  | 7.185068  |
| 7        | 4.512011 | -0.478226 | 10.821890 |
| 7        | 0.753638 | -0.817007 | 7.276545  |
| 7        | 2.656335 | 1.464078  | 11.772238 |
| 7        | 2.107904 | 1.667644  | 6.633689  |
| 6        | 4.801120 | -1.871217 | 10.388973 |
| 1        | 5.304340 | -2.432202 | 11.190666 |
| 1        | 5.495453 | -1.820212 | 9.547267  |
| 6        | 3.576211 | -2.656204 | 9.941835  |
| 1        | 3.896111 | -3.665325 | 9.655393  |
| 1        | 2.822009 | -2.748908 | 10.733391 |
| 6        | 2.123027 | -2.809507 | 8.011494  |
| 1        | 1.327066 | -3.220020 | 8.643297  |
| 1        | 2.688856 | -3.652813 | 7.595974  |
| 6        | 1.574228 | -1.981603 | 6.858193  |
| 1        | 2.411434 | -1.607761 | 6.259241  |
| 1        | 0.984785 | -2.653486 | 6.213893  |

|   |           |           |           |
|---|-----------|-----------|-----------|
| 6 | 5.720557  | 0.357669  | 10.670102 |
| 6 | -0.502549 | -1.264342 | 7.916047  |
| 6 | 4.071393  | -0.460172 | 12.233563 |
| 1 | 4.902707  | -0.720980 | 12.904580 |
| 1 | 3.301355  | -1.229084 | 12.365106 |
| 6 | 3.476396  | 0.866461  | 12.651913 |
| 6 | 3.705637  | 1.413280  | 13.918356 |
| 1 | 4.377002  | 0.915238  | 14.609598 |
| 6 | 3.058090  | 2.596191  | 14.269391 |
| 1 | 3.222382  | 3.040361  | 15.246233 |
| 6 | 2.194443  | 3.200261  | 13.355629 |
| 1 | 1.663728  | 4.114649  | 13.590989 |
| 6 | 2.015001  | 2.596739  | 12.112494 |
| 6 | 1.048102  | 3.162002  | 11.081329 |
| 6 | 0.401210  | 0.004317  | 6.095094  |
| 1 | -0.493226 | 0.581776  | 6.355356  |
| 1 | 0.124422  | -0.631403 | 5.242551  |
| 6 | 1.446107  | 1.009474  | 5.667105  |
| 6 | 1.628299  | 1.320160  | 4.314756  |
| 1 | 1.095741  | 0.757862  | 3.555189  |
| 6 | 2.488706  | 2.358637  | 3.969070  |
| 1 | 2.642359  | 2.619962  | 2.926693  |
| 6 | 3.151590  | 3.055862  | 4.978065  |
| 1 | 3.826957  | 3.873169  | 4.757515  |
| 6 | 2.948689  | 2.666446  | 6.300522  |
| 6 | 3.699006  | 3.344805  | 7.438214  |
| 1 | 6.022523  | 0.382342  | 9.621738  |
| 1 | 6.557647  | -0.029683 | 11.270596 |
| 1 | 5.509203  | 1.379567  | 10.994136 |
| 1 | -1.129085 | -1.840135 | 7.217993  |
| 1 | -1.067264 | -0.391180 | 8.252397  |
| 1 | -0.292351 | -1.889312 | 8.783454  |
| 1 | -0.238598 | -0.361501 | 10.684888 |
| 1 | 4.275345  | -0.188907 | 6.633540  |
| 1 | 0.850271  | -0.264171 | 11.758904 |
| 1 | 5.168400  | 0.880270  | 7.270818  |

Output energies:

|                                              |                             |
|----------------------------------------------|-----------------------------|
| Zero-point correction=                       | 0.480044 (Hartree/Particle) |
| Thermal correction to Energy=                | 0.512726                    |
| Thermal correction to Enthalpy=              | 0.513670                    |
| Thermal correction to Gibbs Free Energy=     | 0.417145                    |
| Sum of electronic and zero-point Energies=   | -1555.963561                |
| Sum of electronic and thermal Energies=      | -1555.930880                |
| Sum of electronic and thermal Enthalpies=    | -1555.929936                |
| Sum of electronic and thermal Free Energies= | -1556.026461                |

(12) La-OxyMepa,  $N1^S N2^S(\lambda\lambda)$ , enantiomer of  $N1^R N2^R(\delta\delta)$ ,  $q = 1$

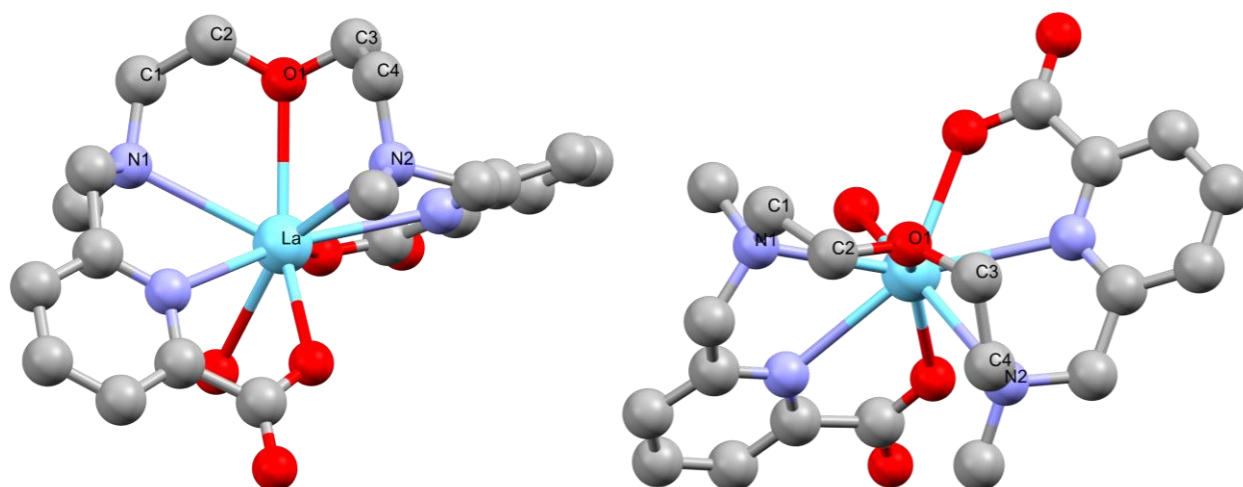

**Figure S104.** Side view (left) and top view (right) of optimized La-OxyMepa complex in  $N1^S N2^S(\lambda\lambda)$  conformation ( $q = 1$ ). Hydrogen atoms are omitted for clarity.

Optimized Cartesian coordinates in Å:

| Atomic # | x         | y         | z         |
|----------|-----------|-----------|-----------|
| 6        | -1.876168 | -0.591077 | 2.863384  |
| 6        | -3.111353 | -0.276784 | 2.050840  |
| 6        | -4.394597 | -0.446988 | 2.580940  |
| 6        | -5.496564 | -0.072911 | 1.815650  |
| 6        | -5.293563 | 0.442908  | 0.536074  |
| 6        | -3.986126 | 0.566427  | 0.069332  |
| 6        | -3.699659 | 1.072425  | -1.335476 |
| 8        | -4.651995 | 1.477809  | -2.026558 |
| 6        | -0.962353 | -2.621243 | 1.797109  |
| 8        | -1.127708 | -2.351794 | -0.645876 |
| 6        | -0.159527 | -3.225020 | -1.261462 |
| 6        | 0.353846  | -2.564521 | -2.526727 |
| 7        | 1.091993  | -1.301104 | -2.286037 |
| 6        | 2.453931  | -1.576706 | -1.780582 |
| 6        | 3.111960  | -0.361897 | -1.164953 |
| 6        | 4.479137  | -0.108650 | -1.315866 |
| 6        | 5.039384  | 0.984336  | -0.658191 |
| 6        | 4.225930  | 1.797678  | 0.130461  |
| 6        | 2.870621  | 1.487841  | 0.225180  |
| 6        | 1.923488  | 2.328047  | 1.069180  |
| 8        | 2.384756  | 3.307729  | 1.682533  |
| 6        | 1.178404  | -0.533079 | -3.545821 |
| 8        | 0.690623  | 1.952370  | 1.086745  |
| 7        | 2.333642  | 0.431103  | -0.411575 |

|    |           |           |           |
|----|-----------|-----------|-----------|
| 8  | -2.469903 | 1.027869  | -1.718286 |
| 7  | -2.922834 | 0.230631  | 0.822253  |
| 1  | 0.176522  | -0.248232 | -3.877481 |
| 1  | 1.657056  | -1.121762 | -4.342878 |
| 1  | 1.765469  | 0.374419  | -3.389549 |
| 1  | 3.092339  | -1.982687 | -2.578473 |
| 1  | 2.388104  | -2.346301 | -1.004027 |
| 1  | -0.503432 | -2.330026 | -3.164921 |
| 1  | 0.979605  | -3.287511 | -3.072164 |
| 1  | -0.649312 | -4.169141 | -1.528590 |
| 1  | 0.647177  | -3.449273 | -0.554080 |
| 1  | 4.619415  | 2.656393  | 0.660316  |
| 1  | 6.097955  | 1.201348  | -0.761907 |
| 1  | 5.084723  | -0.758571 | -1.938394 |
| 1  | -6.119869 | 0.734613  | -0.100394 |
| 1  | -6.501791 | -0.192548 | 2.207614  |
| 1  | -4.518269 | -0.867157 | 3.573346  |
| 57 | -0.420898 | 0.283202  | -0.421789 |
| 7  | -0.757998 | -1.177735 | 2.091475  |
| 1  | -1.517397 | 0.355770  | 3.284220  |
| 1  | -2.146949 | -1.233558 | 3.713659  |
| 6  | 0.487245  | -1.013755 | 2.872941  |
| 1  | 1.327901  | -1.431580 | 2.314789  |
| 1  | 0.677152  | 0.047324  | 3.047349  |
| 1  | 0.432434  | -1.525081 | 3.846071  |
| 6  | -1.759062 | -2.903839 | 0.529655  |
| 1  | -1.866976 | -3.987698 | 0.408222  |
| 1  | -2.759635 | -2.470807 | 0.566563  |
| 1  | 0.025861  | -3.076381 | 1.688337  |
| 1  | -1.455673 | -3.126737 | 2.641526  |
| 8  | 0.018449  | 2.474793  | -1.938932 |
| 1  | 0.242530  | 3.181881  | -1.314939 |
| 1  | -0.910589 | 2.632128  | -2.176733 |

Output energies:

|                                              |                             |
|----------------------------------------------|-----------------------------|
| Zero-point correction=                       | 0.454317 (Hartree/Particle) |
| Thermal correction to Energy=                | 0.481950                    |
| Thermal correction to Enthalpy=              | 0.482894                    |
| Thermal correction to Gibbs Free Energy=     | 0.395871                    |
| Sum of electronic and zero-point Energies=   | -1479.548876                |
| Sum of electronic and thermal Energies=      | -1479.521243                |
| Sum of electronic and thermal Enthalpies=    | -1479.520299                |
| Sum of electronic and thermal Free Energies= | -1479.607322                |



(13a) La-OxyMepa,  $N1^S N2^R(\delta\delta)$ , enantiomer of  $N1^R N2^S(\lambda\lambda)$ ,  $q = 1$

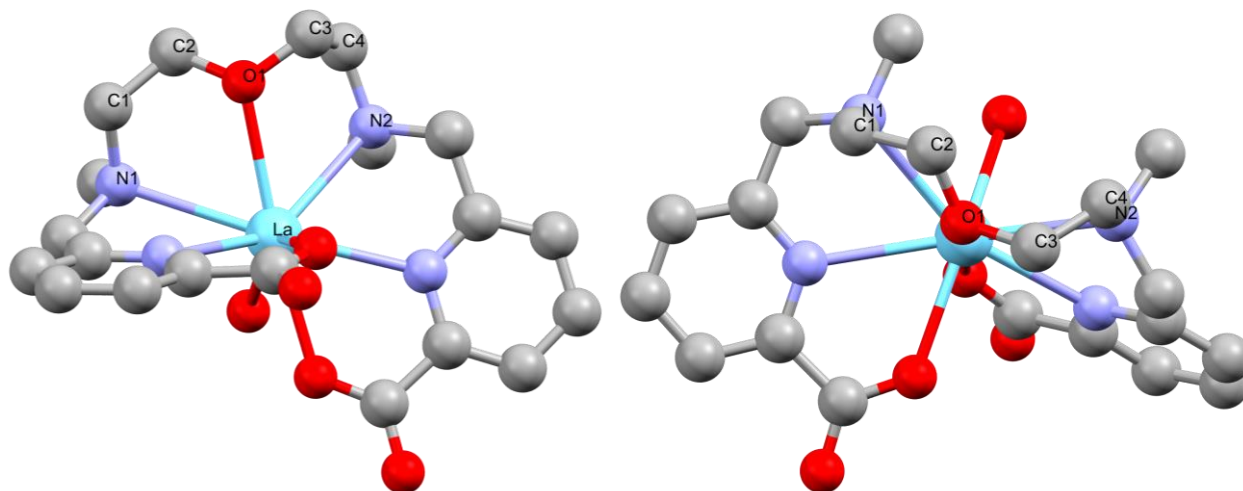

**Figure S105.** Side view (left) and top view (right) of optimized La-OxyMepa complex in  $N1^S N2^R(\delta\delta)$  conformation. Hydrogen atoms are omitted for clarity.

Optimized Cartesian coordinates in Å:

| Atomic # | x         | y         | z         |
|----------|-----------|-----------|-----------|
| 6        | 3.144344  | 1.731592  | -0.736248 |
| 6        | 3.692747  | 0.400441  | -0.274476 |
| 6        | 5.052959  | 0.093535  | -0.383140 |
| 6        | 5.510912  | -1.126415 | 0.108252  |
| 6        | 4.601729  | -2.015363 | 0.681166  |
| 6        | 3.259575  | -1.645814 | 0.743196  |
| 6        | 2.212510  | -2.577457 | 1.335217  |
| 8        | 2.589430  | -3.661793 | 1.816144  |
| 6        | 1.237017  | 2.987637  | -1.551530 |
| 8        | -0.515390 | 2.790253  | 0.153957  |
| 6        | -1.741312 | 3.053641  | -0.554995 |
| 6        | -2.839995 | 2.182729  | 0.022448  |
| 7        | -2.600024 | 0.728332  | -0.141759 |
| 6        | -3.483789 | -0.033369 | 0.766806  |
| 6        | -3.108323 | 0.126903  | 2.224979  |
| 6        | -4.072364 | 0.110878  | 3.238468  |
| 6        | -3.658730 | 0.214423  | 4.564634  |
| 6        | -2.299878 | 0.353158  | 4.848543  |
| 6        | -1.399955 | 0.377812  | 3.785586  |
| 6        | 0.091758  | 0.570769  | 4.009169  |
| 8        | 0.518384  | 0.618066  | 5.176835  |
| 6        | -2.842441 | 0.311396  | -1.534748 |
| 8        | 0.813215  | 0.681759  | 2.945734  |
| 7        | -1.802756 | 0.253899  | 2.508233  |

|    |           |           |           |
|----|-----------|-----------|-----------|
| 8  | 0.991274  | -2.169518 | 1.281891  |
| 7  | 2.824308  | -0.458579 | 0.281894  |
| 1  | -2.141074 | 0.813580  | -2.205387 |
| 1  | -2.690939 | -0.765739 | -1.627378 |
| 1  | -3.866586 | 0.551018  | -1.860084 |
| 1  | -4.539412 | 0.243785  | 0.627003  |
| 1  | -3.397898 | -1.094008 | 0.501746  |
| 1  | -2.926896 | 2.401053  | 1.089720  |
| 1  | -3.792818 | 2.470926  | -0.449011 |
| 1  | -2.014127 | 4.107178  | -0.417296 |
| 1  | -1.604269 | 2.877121  | -1.626902 |
| 1  | -1.934809 | 0.449899  | 5.863709  |
| 1  | -4.388562 | 0.200295  | 5.368123  |
| 1  | -5.123162 | 0.021361  | 2.984367  |
| 1  | 4.911470  | -2.977803 | 1.069216  |
| 1  | 6.562770  | -1.385131 | 0.037682  |
| 1  | 5.731551  | 0.801733  | -0.846367 |
| 57 | 0.152415  | 0.149956  | 0.569828  |
| 7  | 1.792116  | 1.629631  | -1.329178 |
| 1  | 3.847757  | 2.191192  | -1.446340 |
| 1  | 3.089816  | 2.396450  | 0.133347  |
| 6  | 1.862794  | 0.903482  | -2.614073 |
| 1  | 0.857588  | 0.786561  | -3.027079 |
| 1  | 2.294741  | -0.088820 | -2.464854 |
| 1  | 2.482426  | 1.439029  | -3.349388 |
| 6  | 0.604516  | 3.576369  | -0.299638 |
| 1  | 0.278048  | 4.604538  | -0.493927 |
| 1  | 1.308712  | 3.596235  | 0.536468  |
| 1  | 0.479799  | 2.914296  | -2.336747 |
| 1  | 2.012560  | 3.675698  | -1.921433 |
| 8  | -0.163593 | -1.826335 | -1.323626 |
| 1  | 0.302035  | -2.452554 | -0.741243 |
| 1  | 0.463179  | -1.640907 | -2.039728 |

Output energies:

|                                              |                             |
|----------------------------------------------|-----------------------------|
| Zero-point correction=                       | 0.455678 (Hartree/Particle) |
| Thermal correction to Energy=                | 0.484167                    |
| Thermal correction to Enthalpy=              | 0.485111                    |
| Thermal correction to Gibbs Free Energy=     | 0.397747                    |
| Sum of electronic and zero-point Energies=   | -1479.551913                |
| Sum of electronic and thermal Energies=      | -1479.523424                |
| Sum of electronic and thermal Enthalpies=    | -1479.522480                |
| Sum of electronic and thermal Free Energies= | -1479.609844                |

(13b) La-OxyMepa, N1<sup>S</sup>N2<sup>R</sup>( $\delta\delta$ ), enantiomer of N1<sup>R</sup>N2<sup>S</sup>( $\lambda\lambda$ ),  $q = 2$

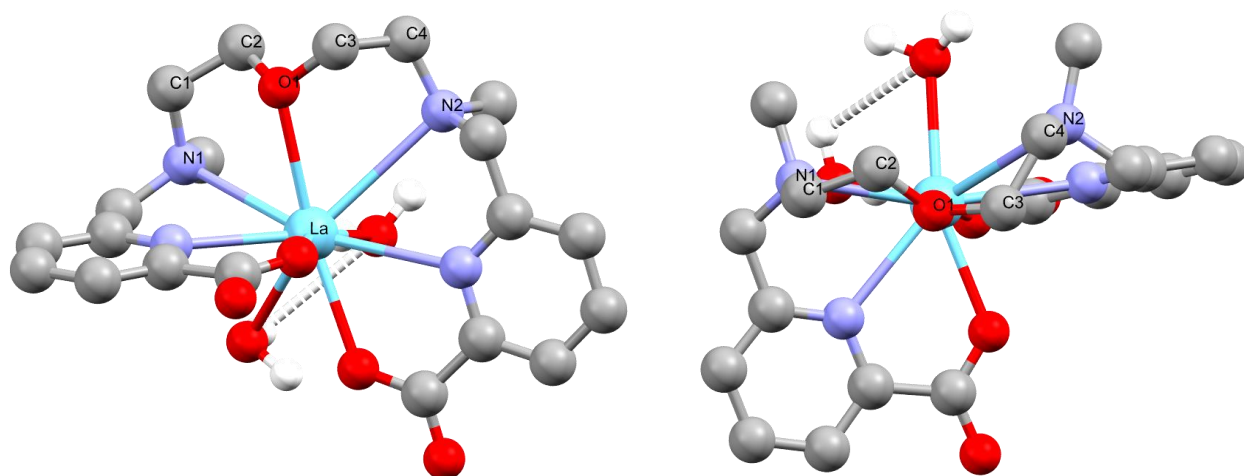

**Figure S106.** Side view (left) and top view (right) of optimized La-OxyMepa complex in N1<sup>S</sup>N2<sup>R</sup>( $\delta\delta$ ) conformation ( $q = 2$ ). Hydrogen atoms on inner-sphere waters are shown to present the hydrogen bonding interaction. Other hydrogen atoms are omitted for clarity.

Optimized Cartesian coordinates in Å:

| Atomic # | x         | y         | z         |
|----------|-----------|-----------|-----------|
| 6        | 3.250474  | 1.821166  | -0.439971 |
| 6        | 3.792661  | 0.427431  | -0.215705 |
| 6        | 5.163314  | 0.165612  | -0.316075 |
| 6        | 5.631518  | -1.118464 | -0.049598 |
| 6        | 4.717574  | -2.110478 | 0.298693  |
| 6        | 3.366277  | -1.773839 | 0.379607  |
| 6        | 2.335575  | -2.820811 | 0.766228  |
| 8        | 2.699179  | -4.006039 | 0.874512  |
| 6        | 1.440975  | 3.190334  | -1.287297 |
| 8        | -0.518103 | 2.563851  | 0.083587  |
| 6        | -1.630564 | 2.874146  | -0.774823 |
| 6        | -2.846146 | 2.136836  | -0.247342 |
| 7        | -2.692114 | 0.663932  | -0.294828 |
| 6        | -3.582237 | 0.019511  | 0.690658  |
| 6        | -3.113345 | 0.203093  | 2.117692  |
| 6        | -4.026663 | 0.295715  | 3.173849  |
| 6        | -3.547216 | 0.413689  | 4.475463  |
| 6        | -2.170094 | 0.458122  | 4.691891  |
| 6        | -1.321525 | 0.373770  | 3.590708  |
| 6        | 0.187756  | 0.455775  | 3.750521  |
| 8        | 0.663308  | 0.528701  | 4.898515  |
| 6        | -3.000667 | 0.153180  | -1.643571 |
| 8        | 0.871658  | 0.452784  | 2.658859  |

|    |           |           |           |
|----|-----------|-----------|-----------|
| 7  | -1.787882 | 0.234968  | 2.334940  |
| 8  | 1.136775  | -2.393090 | 0.964735  |
| 7  | 2.915720  | -0.530201 | 0.130882  |
| 1  | -4.617141 | 0.380556  | 0.595344  |
| 1  | -3.600171 | -1.053257 | 0.471019  |
| 1  | -3.005956 | 2.438471  | 0.791090  |
| 1  | -3.732960 | 2.452070  | -0.818514 |
| 1  | -1.822716 | 3.953510  | -0.745635 |
| 1  | -1.402180 | 2.594453  | -1.809829 |
| 1  | -1.750294 | 0.564427  | 5.684636  |
| 1  | -4.238068 | 0.483407  | 5.309897  |
| 1  | -5.091737 | 0.278789  | 2.968417  |
| 1  | 5.028865  | -3.126218 | 0.508670  |
| 1  | 6.691384  | -1.342787 | -0.118906 |
| 1  | 5.843312  | 0.961909  | -0.599315 |
| 57 | 0.057040  | -0.134035 | 0.335689  |
| 7  | 2.059618  | 1.850536  | -1.305341 |
| 1  | 4.051570  | 2.458148  | -0.848347 |
| 1  | 2.981424  | 2.236434  | 0.537081  |
| 6  | 2.423817  | 1.475607  | -2.679267 |
| 6  | 0.607679  | 3.450866  | -0.039650 |
| 1  | 0.251004  | 4.488103  | -0.050407 |
| 1  | 1.190911  | 3.304013  | 0.872932  |
| 1  | 0.800607  | 3.275150  | -2.170099 |
| 1  | 2.199653  | 3.986767  | -1.371508 |
| 8  | -1.402571 | -2.457629 | 0.231615  |
| 8  | 0.162211  | -1.174822 | -2.177868 |
| 1  | 3.154003  | 2.173055  | -3.122321 |
| 1  | 1.530844  | 1.473409  | -3.311375 |
| 1  | 2.861553  | 0.474114  | -2.693920 |
| 1  | -0.707155 | -1.407546 | -2.535309 |
| 1  | -1.579542 | -2.659023 | -0.699207 |
| 1  | -2.347927 | 0.621434  | -2.383438 |
| 1  | -4.044419 | 0.358335  | -1.928356 |
| 1  | -2.841832 | -0.927738 | -1.673235 |
| 1  | -0.559502 | -2.913309 | 0.438514  |
| 1  | 0.558560  | -0.588369 | -2.838795 |

#### Output energies:

|                                              |                             |
|----------------------------------------------|-----------------------------|
| Zero-point correction=                       | 0.480530 (Hartree/Particle) |
| Thermal correction to Energy=                | 0.511357                    |
| Thermal correction to Enthalpy=              | 0.512301                    |
| Thermal correction to Gibbs Free Energy=     | 0.417797                    |
| Sum of electronic and zero-point Energies=   | -1555.968043                |
| Sum of electronic and thermal Energies=      | -1555.937216                |
| Sum of electronic and thermal Enthalpies=    | -1555.936272                |
| Sum of electronic and thermal Free Energies= | -1556.030777                |

(14) La-OxyMepa,  $N1^S N2^R(\delta\lambda)$ , enantiomer of  $N1^R N2^S(\lambda\delta)$ ,  $q = 1$

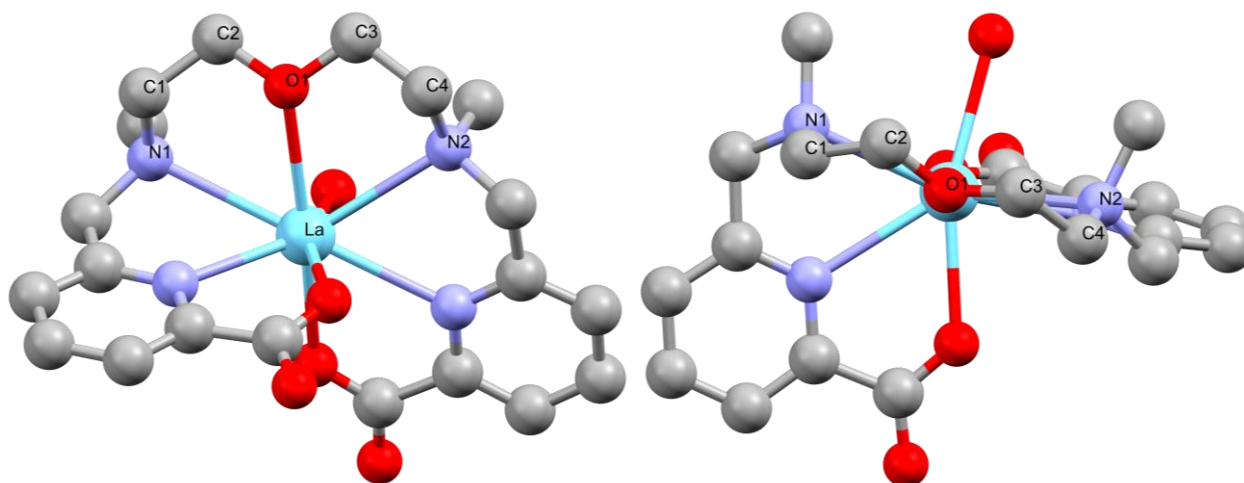

**Figure S107.** Side view (left) and top view (right) of optimized La-OxyMepa complex in  $N1^S N2^R(\delta\lambda)$  conformation ( $q = 1$ ). Hydrogen atoms are omitted for clarity.

Optimized Cartesian coordinates in Å:

| Atomic # | x         | y         | z         |
|----------|-----------|-----------|-----------|
| 6        | 3.345583  | 1.632739  | -0.196063 |
| 6        | 3.732441  | 0.183695  | 0.007039  |
| 6        | 5.057813  | -0.252116 | -0.085623 |
| 6        | 5.345951  | -1.592546 | 0.164748  |
| 6        | 4.308173  | -2.465869 | 0.489850  |
| 6        | 3.011757  | -1.958459 | 0.559056  |
| 6        | 1.824531  | -2.847519 | 0.897272  |
| 8        | 2.024015  | -4.063003 | 1.077323  |
| 6        | 1.563433  | 3.169420  | -0.762690 |
| 8        | -0.762300 | 2.536650  | -0.597192 |
| 6        | -2.105443 | 2.652946  | -1.097413 |
| 6        | -3.051185 | 1.890647  | -0.188752 |
| 7        | -2.767781 | 0.438299  | -0.101986 |
| 6        | -3.500065 | -0.149360 | 1.039074  |
| 6        | -2.951732 | 0.273034  | 2.384547  |
| 6        | -3.787593 | 0.396917  | 3.499879  |
| 6        | -3.229716 | 0.740275  | 4.728329  |
| 6        | -1.857217 | 0.975851  | 4.811341  |
| 6        | -1.091794 | 0.851983  | 3.654594  |
| 6        | 0.399533  | 1.144511  | 3.655457  |
| 8        | 0.962119  | 1.378634  | 4.740734  |
| 6        | -3.170984 | -0.249479 | -1.342085 |
| 8        | 0.973721  | 1.140652  | 2.502766  |
| 7        | -1.630160 | 0.491225  | 2.474317  |

|    |           |           |           |
|----|-----------|-----------|-----------|
| 8  | 0.680211  | -2.259891 | 0.970488  |
| 7  | 2.741369  | -0.662517 | 0.327330  |
| 1  | -2.622540 | 0.155482  | -2.194540 |
| 1  | -2.940619 | -1.314689 | -1.260625 |
| 1  | -4.248819 | -0.137844 | -1.537621 |
| 1  | -4.573144 | 0.089134  | 0.990994  |
| 1  | -3.416574 | -1.239845 | 0.959318  |
| 1  | -2.978968 | 2.316022  | 0.815698  |
| 1  | -4.079813 | 2.062641  | -0.543949 |
| 1  | -2.400817 | 3.709623  | -1.097986 |
| 1  | -2.138136 | 2.292622  | -2.132865 |
| 1  | -1.381727 | 1.258740  | 5.742354  |
| 1  | -3.858404 | 0.836412  | 5.607972  |
| 1  | -4.854216 | 0.228242  | 3.396083  |
| 1  | 4.485322  | -3.516889 | 0.682520  |
| 1  | 6.367148  | -1.954435 | 0.097282  |
| 1  | 5.841450  | 0.448708  | -0.352692 |
| 57 | 0.094156  | 0.122870  | 0.355291  |
| 7  | 2.052991  | 1.777924  | -0.901723 |
| 1  | 4.149894  | 2.161923  | -0.727272 |
| 1  | 3.248653  | 2.101271  | 0.789923  |
| 6  | 2.216591  | 1.407433  | -2.321619 |
| 6  | 0.161486  | 3.383692  | -1.302131 |
| 1  | 0.096268  | 3.179098  | -2.377490 |
| 1  | -0.116158 | 4.433307  | -1.143062 |
| 1  | 2.233139  | 3.875556  | -1.279076 |
| 1  | 1.575222  | 3.421603  | 0.302353  |
| 8  | 0.086902  | -1.287862 | -1.976986 |
| 1  | 0.451059  | -2.149524 | -1.721686 |
| 1  | 0.711905  | -0.936445 | -2.628463 |
| 1  | 2.664301  | 0.413940  | -2.395385 |
| 1  | 1.249922  | 1.384257  | -2.828530 |
| 1  | 2.870472  | 2.119623  | -2.847409 |

Output energies:

|                                              |                             |
|----------------------------------------------|-----------------------------|
| Zero-point correction=                       | 0.455847 (Hartree/Particle) |
| Thermal correction to Energy=                | 0.484518                    |
| Thermal correction to Enthalpy=              | 0.485462                    |
| Thermal correction to Gibbs Free Energy=     | 0.397583                    |
| Sum of electronic and zero-point Energies=   | -1479.553458                |
| Sum of electronic and thermal Energies=      | -1479.524787                |
| Sum of electronic and thermal Enthalpies=    | -1479.523843                |
| Sum of electronic and thermal Free Energies= | -1479.611722                |

(15a) La-OxyMepa,  $N1^S N2^R(\lambda\delta)$ , enantiomer of  $N1^R N2^S(\delta\lambda)$ ,  $q = 1$

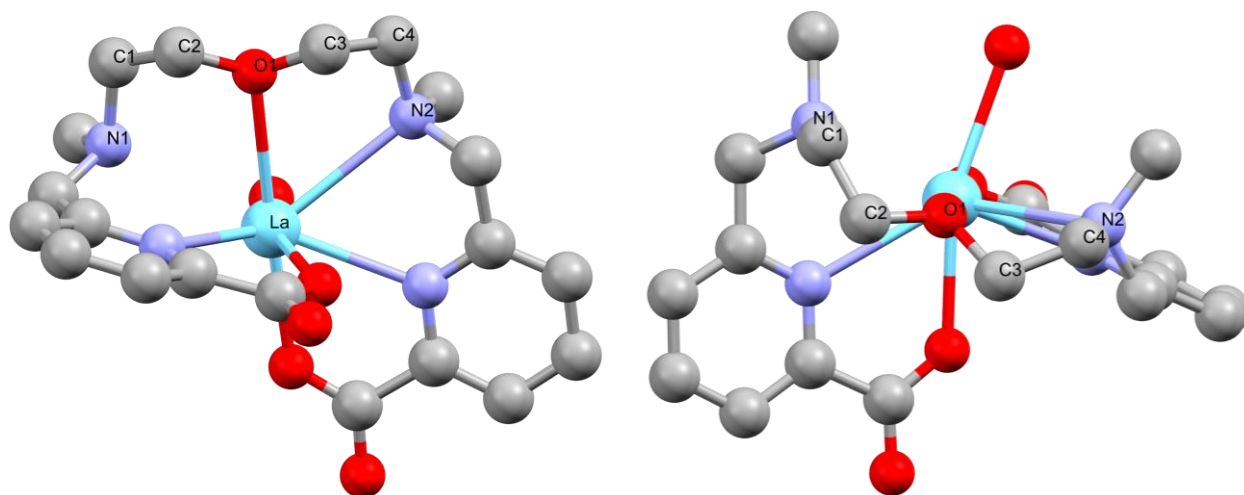

**Figure S108.** Side view (left) and top view (right) of optimized La-OxyMepa complex in  $N1^S N2^R(\lambda\delta)$  conformation ( $q = 1$ ). Hydrogen atoms are omitted for clarity.

Optimized Cartesian coordinates in Å:

| Atomic # | x         | y         | z         |
|----------|-----------|-----------|-----------|
| 6        | 3.086838  | 1.717693  | -0.191559 |
| 6        | 3.646931  | 0.333886  | 0.055156  |
| 6        | 5.024098  | 0.113711  | 0.163846  |
| 6        | 5.483089  | -1.166721 | 0.463443  |
| 6        | 4.560033  | -2.195961 | 0.645849  |
| 6        | 3.204055  | -1.902322 | 0.513176  |
| 6        | 2.141126  | -2.968720 | 0.727126  |
| 8        | 2.504821  | -4.129568 | 0.987168  |
| 6        | 1.288757  | 3.067559  | -1.113673 |
| 8        | -0.850007 | 2.310541  | -0.402552 |
| 6        | -2.167917 | 2.646762  | 0.057029  |
| 6        | -3.150026 | 1.700942  | -0.621101 |
| 7        | -2.918019 | 0.255806  | -0.368018 |
| 6        | -3.631509 | -0.222607 | 0.833054  |
| 6        | -3.053666 | 0.268421  | 2.139203  |
| 6        | -3.885754 | 0.683575  | 3.184070  |
| 6        | -3.314922 | 1.077138  | 4.391734  |
| 6        | -1.927696 | 1.059696  | 4.519910  |
| 6        | -1.163242 | 0.643711  | 3.431349  |
| 6        | 0.353029  | 0.641397  | 3.503551  |
| 8        | 0.899990  | 0.950058  | 4.578772  |
| 6        | -3.384842 | -0.528665 | -1.528831 |
| 8        | 0.970532  | 0.321164  | 2.422031  |
| 7        | -1.715744 | 0.244358  | 2.270302  |

|    |           |           |           |
|----|-----------|-----------|-----------|
| 8  | 0.915606  | -2.578117 | 0.627768  |
| 7  | 2.766303  | -0.665711 | 0.216338  |
| 1  | -2.847979 | -0.214616 | -2.426496 |
| 1  | -3.189218 | -1.590971 | -1.359357 |
| 1  | -4.463904 | -0.401092 | -1.708725 |
| 1  | -4.699687 | 0.038574  | 0.787848  |
| 1  | -3.572458 | -1.317786 | 0.834651  |
| 1  | -3.058861 | 1.863183  | -1.698554 |
| 1  | -4.173048 | 1.991272  | -0.336977 |
| 1  | -2.409978 | 3.671976  | -0.250784 |
| 1  | -2.210748 | 2.602293  | 1.150344  |
| 1  | -1.432393 | 1.366605  | 5.432764  |
| 1  | -3.941399 | 1.402509  | 5.216361  |
| 1  | -4.960808 | 0.698538  | 3.041352  |
| 1  | 4.869062  | -3.205931 | 0.885730  |
| 1  | 6.547604  | -1.360000 | 0.552195  |
| 1  | 5.715790  | 0.936024  | 0.014974  |
| 57 | 0.036167  | -0.287212 | 0.159355  |
| 7  | 1.903747  | 1.713766  | -1.074317 |
| 1  | 3.879582  | 2.363146  | -0.599626 |
| 1  | 2.789327  | 2.145624  | 0.773092  |
| 6  | 2.293389  | 1.305835  | -2.438639 |
| 1  | 1.405634  | 1.260155  | -3.074746 |
| 1  | 2.760681  | 0.318955  | -2.418808 |
| 1  | 3.006659  | 2.013460  | -2.888863 |
| 6  | 0.180406  | 3.264082  | -0.093857 |
| 1  | -0.215637 | 4.282269  | -0.186783 |
| 1  | 0.527886  | 3.117902  | 0.937764  |
| 1  | 0.849332  | 3.208743  | -2.104778 |
| 1  | 2.049202  | 3.850782  | -0.984440 |
| 8  | 0.009405  | -1.365655 | -2.338453 |
| 1  | 0.238888  | -2.302253 | -2.236817 |
| 1  | 0.719930  | -0.996861 | -2.884599 |

Output energies:

|                                              |                             |
|----------------------------------------------|-----------------------------|
| Zero-point correction=                       | 0.455544 (Hartree/Particle) |
| Thermal correction to Energy=                | 0.485231                    |
| Thermal correction to Enthalpy=              | 0.486175                    |
| Thermal correction to Gibbs Free Energy=     | 0.394640                    |
| Sum of electronic and zero-point Energies=   | -1479.547252                |
| Sum of electronic and thermal Energies=      | -1479.517565                |
| Sum of electronic and thermal Enthalpies=    | -1479.516621                |
| Sum of electronic and thermal Free Energies= | -1479.608157                |



(15b) La-OxyMepa,  $N1^S N2^R(\lambda\delta)$ , enantiomer of  $N1^R N2^S(\delta\lambda)$ ,  $q = 2$

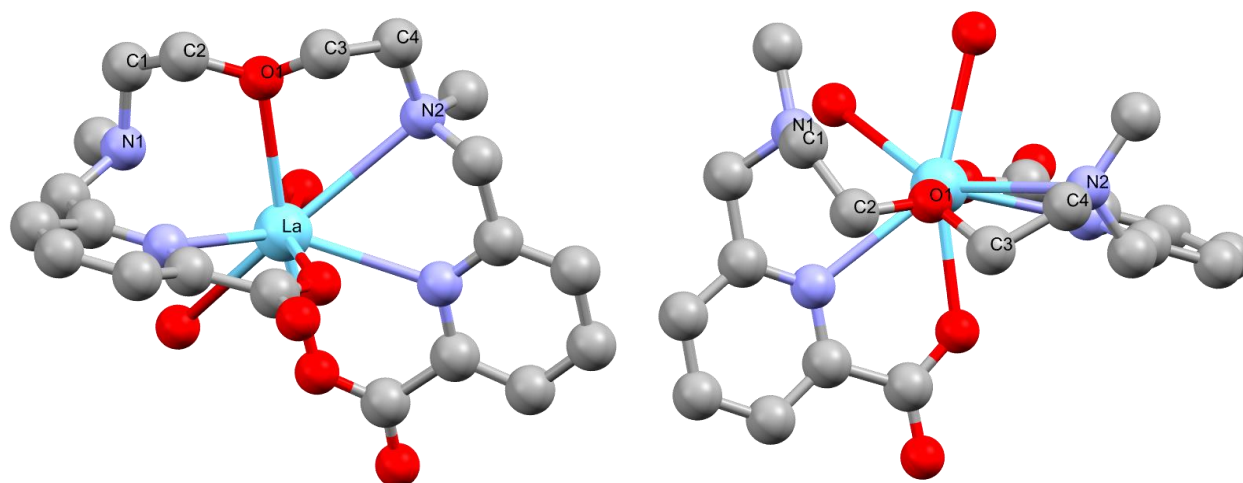

**Figure S109.** Side view (left) and top view (right) of optimized La-OxyMepa complex in  $N1^S N2^R(\lambda\delta)$  conformation ( $q = 2$ ). Hydrogen atoms are omitted for clarity.

Optimized Cartesian coordinates in Å:

| Atomic # | x         | y         | z         |
|----------|-----------|-----------|-----------|
| 6        | 3.219749  | 1.762574  | -0.113761 |
| 6        | 3.788333  | 0.375264  | 0.082561  |
| 6        | 5.164379  | 0.167520  | 0.228091  |
| 6        | 5.636044  | -1.123272 | 0.454421  |
| 6        | 4.723989  | -2.175042 | 0.526853  |
| 6        | 3.368282  | -1.888269 | 0.379654  |
| 6        | 2.321218  | -2.979528 | 0.491278  |
| 8        | 2.684343  | -4.167916 | 0.507693  |
| 6        | 1.513288  | 3.154301  | -1.119228 |
| 8        | -0.642303 | 2.385067  | -0.465884 |
| 6        | -1.972009 | 2.770369  | -0.090014 |
| 6        | -2.948689 | 1.874765  | -0.836186 |
| 7        | -2.795091 | 0.418787  | -0.590997 |
| 6        | -3.565339 | -0.030628 | 0.585792  |
| 6        | -3.003624 | 0.411713  | 1.916306  |
| 6        | -3.856285 | 0.825517  | 2.945728  |
| 6        | -3.313944 | 1.177128  | 4.178484  |
| 6        | -1.931978 | 1.121850  | 4.347088  |
| 6        | -1.145699 | 0.707788  | 3.273691  |
| 6        | 0.366730  | 0.664790  | 3.395196  |
| 8        | 0.885764  | 0.952747  | 4.489847  |
| 6        | -3.288932 | -0.317638 | -1.772009 |
| 8        | 1.011753  | 0.334479  | 2.332701  |
| 7        | -1.671555 | 0.346307  | 2.087587  |

|    |           |           |           |
|----|-----------|-----------|-----------|
| 8  | 1.101061  | -2.569362 | 0.579175  |
| 7  | 2.915132  | -0.641802 | 0.155682  |
| 1  | -4.615057 | 0.293049  | 0.514638  |
| 1  | -3.570833 | -1.126341 | 0.576941  |
| 1  | -3.974084 | 2.205874  | -0.609383 |
| 1  | -2.785287 | 2.043530  | -1.904394 |
| 1  | -2.088250 | 2.725714  | 0.997690  |
| 1  | -2.152042 | 3.805640  | -0.406707 |
| 1  | -1.456930 | 1.397229  | 5.280498  |
| 1  | -3.957376 | 1.500296  | 4.990819  |
| 1  | -4.925647 | 0.872676  | 2.770328  |
| 1  | 5.040027  | -3.196799 | 0.698689  |
| 1  | 6.699792  | -1.306868 | 0.569008  |
| 1  | 5.846326  | 1.008503  | 0.161291  |
| 57 | 0.144869  | -0.259021 | 0.045716  |
| 7  | 2.126327  | 1.802833  | -1.106866 |
| 1  | 4.031945  | 2.449778  | -0.397033 |
| 1  | 2.825636  | 2.113666  | 0.846703  |
| 6  | 2.670763  | 1.504952  | -2.447152 |
| 6  | 0.388840  | 3.323693  | -0.114339 |
| 1  | -0.000525 | 4.345858  | -0.186738 |
| 1  | 0.712862  | 3.148728  | 0.919956  |
| 1  | 1.089402  | 3.321264  | -2.113324 |
| 1  | 2.271272  | 3.935336  | -0.955901 |
| 8  | -1.403158 | -2.720531 | -0.250816 |
| 8  | 0.180911  | -1.050721 | -2.528197 |
| 1  | 3.425522  | 2.245835  | -2.754219 |
| 1  | 1.863307  | 1.512874  | -3.183932 |
| 1  | 3.138607  | 0.518280  | -2.456244 |
| 1  | -0.710396 | -1.260576 | -2.845393 |
| 1  | 0.523708  | -0.398454 | -3.157131 |
| 1  | -1.440400 | -2.823225 | -1.212714 |
| 1  | -2.704319 | -0.040445 | -2.653138 |
| 1  | -4.348048 | -0.099170 | -1.982210 |
| 1  | -3.190016 | -1.392163 | -1.609396 |
| 1  | -0.523674 | -3.072386 | 0.005135  |

Output energies:

|                                              |                             |
|----------------------------------------------|-----------------------------|
| Zero-point correction=                       | 0.481506 (Hartree/Particle) |
| Thermal correction to Energy=                | 0.512545                    |
| Thermal correction to Enthalpy=              | 0.513489                    |
| Thermal correction to Gibbs Free Energy=     | 0.420694                    |
| Sum of electronic and zero-point Energies=   | -1555.963764                |
| Sum of electronic and thermal Energies=      | -1555.932725                |
| Sum of electronic and thermal Enthalpies=    | -1555.931781                |
| Sum of electronic and thermal Free Energies= | -1556.024576                |

(16a) La-OxyMepa, N1<sup>S</sup>N2<sup>R</sup>( $\lambda\lambda$ ), enantiomer of N1<sup>R</sup>N2<sup>S</sup>( $\delta\delta$ ),  $q = 1$

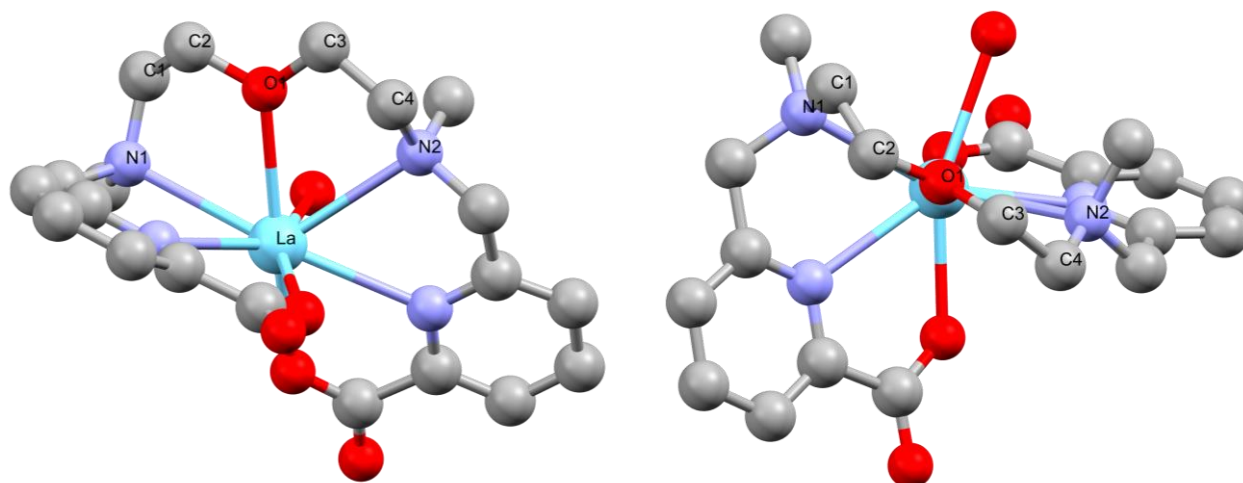

**Figure S110.** Side view (left) and top view (right) of optimized La-OxyMepa complex in N1<sup>S</sup>N2<sup>R</sup>( $\lambda\lambda$ ) conformation ( $q = 1$ ). Hydrogen atoms are omitted for clarity.

Optimized Cartesian coordinates in Å:

| Atomic # | x         | y         | z         |
|----------|-----------|-----------|-----------|
| 6        | 3.232707  | 1.559467  | 0.197891  |
| 6        | 3.704415  | 0.138867  | -0.025920 |
| 6        | 5.033321  | -0.164657 | -0.335768 |
| 6        | 5.404560  | -1.500913 | -0.475720 |
| 6        | 4.444178  | -2.497968 | -0.307818 |
| 6        | 3.137537  | -2.116725 | -0.004184 |
| 6        | 2.033559  | -3.144926 | 0.196257  |
| 8        | 2.310153  | -4.349622 | 0.046413  |
| 6        | 1.310424  | 3.033005  | 0.165879  |
| 8        | -0.867880 | 2.125029  | -0.346309 |
| 6        | -2.277925 | 2.350064  | -0.513433 |
| 6        | -2.923624 | 1.078635  | -1.031425 |
| 7        | -2.749790 | -0.106324 | -0.157060 |
| 6        | -3.620604 | -0.047512 | 1.039841  |
| 6        | -3.019074 | 0.641323  | 2.243544  |
| 6        | -3.830598 | 1.318999  | 3.161852  |
| 6        | -3.255667 | 1.843888  | 4.315232  |
| 6        | -1.884368 | 1.691975  | 4.520328  |
| 6        | -1.139667 | 1.019983  | 3.554689  |
| 6        | 0.363186  | 0.853903  | 3.702460  |
| 8        | 0.914906  | 1.306698  | 4.721998  |
| 6        | -3.079505 | -1.323194 | -0.932539 |
| 8        | 0.965182  | 0.250896  | 2.736612  |
| 7        | -1.700396 | 0.497528  | 2.446115  |

|    |           |           |           |
|----|-----------|-----------|-----------|
| 8  | 0.874225  | -2.680713 | 0.514882  |
| 7  | 2.785885  | -0.827267 | 0.132395  |
| 1  | -2.446869 | -1.375868 | -1.820395 |
| 1  | -2.895523 | -2.210372 | -0.320715 |
| 1  | -4.131687 | -1.333449 | -1.254506 |
| 1  | -4.591705 | 0.406397  | 0.798802  |
| 1  | -3.828279 | -1.079473 | 1.345220  |
| 1  | -2.471086 | 0.840202  | -1.998363 |
| 1  | -3.992238 | 1.279459  | -1.206937 |
| 1  | -2.437516 | 3.140343  | -1.256264 |
| 1  | -2.708884 | 2.685861  | 0.437680  |
| 1  | -1.389011 | 2.087584  | 5.398452  |
| 1  | -3.866089 | 2.369771  | 5.042698  |
| 1  | -4.892557 | 1.424723  | 2.967077  |
| 1  | 4.687882  | -3.548252 | -0.410875 |
| 1  | 6.430142  | -1.760579 | -0.719021 |
| 1  | 5.754555  | 0.634919  | -0.467544 |
| 57 | 0.073923  | -0.278231 | 0.451269  |
| 7  | 1.908170  | 1.806642  | -0.406366 |
| 1  | 3.983784  | 2.267206  | -0.182118 |
| 1  | 3.149075  | 1.726742  | 1.277767  |
| 6  | 2.030185  | 1.890738  | -1.873996 |
| 1  | 1.043568  | 1.916345  | -2.341609 |
| 1  | 2.563236  | 1.012829  | -2.247444 |
| 1  | 2.588693  | 2.787452  | -2.183660 |
| 6  | -0.081138 | 3.327460  | -0.374985 |
| 1  | -0.054060 | 3.706355  | -1.403349 |
| 1  | -0.544756 | 4.093839  | 0.257262  |
| 1  | 1.940630  | 3.916456  | -0.025143 |
| 1  | 1.252589  | 2.890464  | 1.249799  |
| 8  | 0.197200  | -1.056920 | -2.170812 |
| 1  | 0.633682  | -1.922433 | -2.179550 |
| 1  | 0.780937  | -0.480272 | -2.685981 |

Output energies:

|                                              |                             |
|----------------------------------------------|-----------------------------|
| Zero-point correction=                       | 0.456021 (Hartree/Particle) |
| Thermal correction to Energy=                | 0.485428                    |
| Thermal correction to Enthalpy=              | 0.486372                    |
| Thermal correction to Gibbs Free Energy=     | 0.396016                    |
| Sum of electronic and zero-point Energies=   | -1479.548345                |
| Sum of electronic and thermal Energies=      | -1479.518938                |
| Sum of electronic and thermal Enthalpies=    | -1479.517993                |
| Sum of electronic and thermal Free Energies= | -1479.608349                |

(16b) La-OxyMepa,  $N1^S N2^R(\lambda\lambda)$ , enantiomer of  $N1^R N2^S(\delta\delta)$ ,  $q = 1$

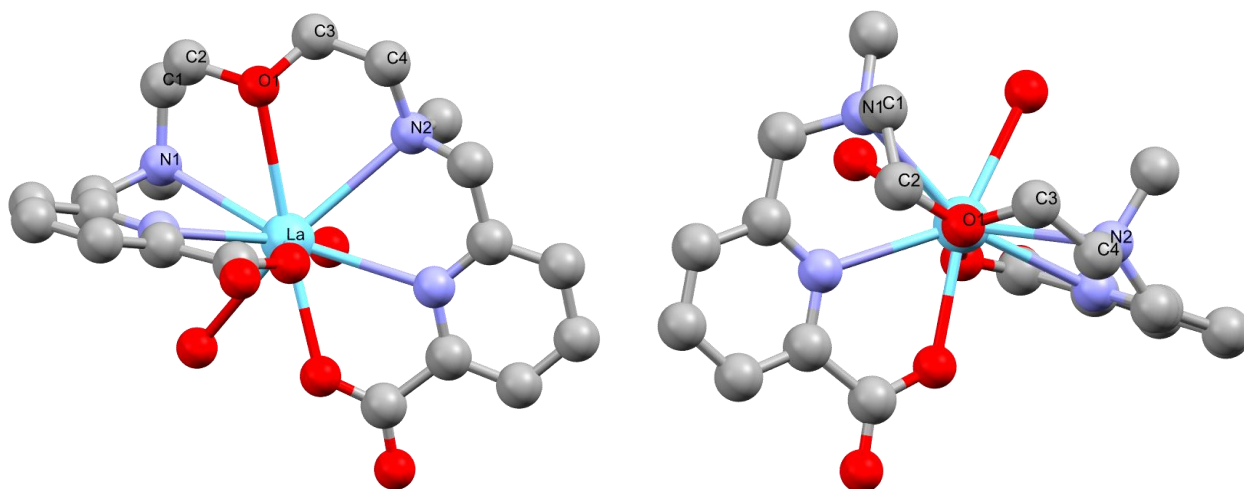

**Figure S111.** Side view (left) and top view (right) of optimized La-OxyMepa complex in  $N1^S N2^R(\lambda\lambda)$  conformation ( $q = 2$ ). Hydrogen atoms are omitted for clarity.

Optimized Cartesian coordinates in Å:

| Atomic # | x         | y         | z         |
|----------|-----------|-----------|-----------|
| 6        | 3.432964  | 1.734878  | -0.175870 |
| 6        | 3.921266  | 0.306297  | -0.116394 |
| 6        | 5.269645  | -0.007111 | -0.319635 |
| 6        | 5.686201  | -1.328546 | -0.182310 |
| 6        | 4.746352  | -2.303572 | 0.147756  |
| 6        | 3.420685  | -1.913991 | 0.331765  |
| 6        | 2.357351  | -2.930268 | 0.704638  |
| 8        | 2.656840  | -4.136589 | 0.728009  |
| 6        | 1.614877  | 3.252228  | -0.615790 |
| 8        | -0.597662 | 2.676779  | 0.111660  |
| 6        | -2.020733 | 2.866104  | 0.043170  |
| 6        | -2.686441 | 1.910101  | -0.934666 |
| 7        | -2.537797 | 0.468047  | -0.607155 |
| 6        | -3.474503 | 0.048691  | 0.461657  |
| 6        | -3.055422 | 0.414484  | 1.868076  |
| 6        | -4.015160 | 0.741654  | 2.833638  |
| 6        | -3.602842 | 1.018319  | 4.133597  |
| 6        | -2.241886 | 0.982378  | 4.435383  |
| 6        | -1.343724 | 0.659331  | 3.421084  |
| 6        | 0.154364  | 0.651425  | 3.678227  |
| 8        | 0.562220  | 0.883662  | 4.830525  |
| 6        | -2.858994 | -0.306547 | -1.827093 |
| 8        | 0.902754  | 0.409648  | 2.657830  |
| 7        | -1.747596 | 0.362725  | 2.170340  |

|    |           |           |           |
|----|-----------|-----------|-----------|
| 8  | 1.194932  | -2.446810 | 0.986125  |
| 7  | 3.019162  | -0.635916 | 0.201686  |
| 1  | -4.483701 | 0.443195  | 0.271875  |
| 1  | -3.550173 | -1.042870 | 0.420567  |
| 1  | -3.752934 | 2.175369  | -1.014027 |
| 1  | -2.245680 | 2.066649  | -1.923651 |
| 1  | -2.398136 | 2.744004  | 1.059293  |
| 1  | -2.240456 | 3.894742  | -0.267529 |
| 1  | -1.869575 | 1.206688  | 5.427232  |
| 1  | -4.330348 | 1.272056  | 4.898128  |
| 1  | -5.063523 | 0.781365  | 2.557940  |
| 1  | 5.019333  | -3.345322 | 0.262945  |
| 1  | 6.727480  | -1.594854 | -0.334370 |
| 1  | 5.971621  | 0.777827  | -0.580017 |
| 57 | 0.206687  | -0.167947 | 0.306452  |
| 7  | 2.114018  | 1.873834  | -0.822470 |
| 1  | 4.189475  | 2.359572  | -0.674599 |
| 1  | 3.342627  | 2.100776  | 0.853740  |
| 6  | 2.231416  | 1.578290  | -2.263416 |
| 6  | 0.131959  | 3.415187  | -0.880730 |
| 1  | -0.144071 | 3.079459  | -1.887602 |
| 1  | -0.123801 | 4.479410  | -0.799661 |
| 1  | 2.162519  | 3.963818  | -1.254515 |
| 1  | 1.805886  | 3.533680  | 0.424142  |
| 8  | -1.348030 | -2.584179 | 0.374865  |
| 8  | 0.329952  | -1.262121 | -2.192767 |
| 1  | -2.157809 | -0.048161 | -2.623663 |
| 1  | -3.879402 | -0.099305 | -2.184333 |
| 1  | -2.782781 | -1.376697 | -1.623292 |
| 1  | -1.484572 | -2.865766 | -0.541199 |
| 1  | -0.504560 | -1.718326 | -2.378842 |
| 1  | 2.916197  | 2.281461  | -2.763237 |
| 1  | 1.255161  | 1.647102  | -2.748977 |
| 1  | 2.611814  | 0.565048  | -2.409724 |
| 1  | 0.402830  | -0.588939 | -2.885740 |
| 1  | -0.460107 | -2.933276 | 0.612524  |

Output energies:

|                                              |                             |
|----------------------------------------------|-----------------------------|
| Zero-point correction=                       | 0.480256 (Hartree/Particle) |
| Thermal correction to Energy=                | 0.510233                    |
| Thermal correction to Enthalpy=              | 0.511177                    |
| Thermal correction to Gibbs Free Energy=     | 0.419201                    |
| Sum of electronic and zero-point Energies=   | -1555.966361                |
| Sum of electronic and thermal Energies=      | -1555.936384                |
| Sum of electronic and thermal Enthalpies=    | -1555.935440                |
| Sum of electronic and thermal Free Energies= | -1556.027417                |

(17) Lu-Oxyaapa,  $N1^S N2^S(\delta\delta)$ , enantiomer of  $N1^R N2^R(\lambda\lambda)$

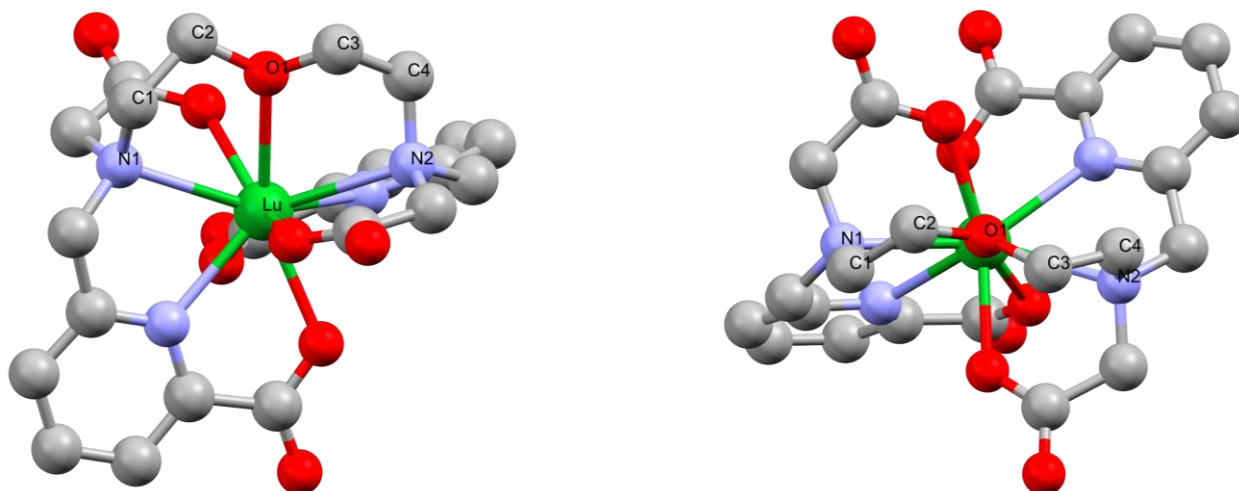

**Figure S112.** Side view (left) and top view (right) of optimized Lu-Oxyaapa complex in  $N1^S N2^S(\delta\delta)$  conformation. Hydrogen atoms are omitted for clarity.

Optimized Cartesian coordinates in Å:

| Atomic # | x         | y         | z         |
|----------|-----------|-----------|-----------|
| 71       | 2.549861  | 0.443147  | 9.193226  |
| 8        | 3.131246  | -2.002320 | 8.603340  |
| 8        | 4.733740  | 0.192764  | 8.309299  |
| 8        | 0.953575  | -0.868033 | 10.325063 |
| 8        | 0.809539  | 2.084666  | 9.594801  |
| 8        | 3.626788  | 2.667408  | 8.947688  |
| 8        | 6.953973  | -0.069717 | 8.531115  |
| 8        | -0.831924 | -2.224134 | 10.451525 |
| 8        | 0.270884  | 4.015343  | 10.621176 |
| 8        | 4.817195  | 3.957060  | 7.534550  |
| 7        | 4.282797  | -0.693265 | 10.915067 |
| 7        | 0.756942  | -0.747238 | 7.540673  |
| 7        | 2.585949  | 1.461881  | 11.500155 |
| 7        | 2.266496  | 1.552320  | 6.920937  |
| 6        | 4.164613  | -2.170863 | 10.788695 |
| 1        | 3.224213  | -2.461454 | 11.262935 |
| 1        | 4.983277  | -2.673278 | 11.326991 |
| 6        | 4.145900  | -2.682436 | 9.357841  |
| 1        | 5.106373  | -2.541189 | 8.851381  |
| 1        | 3.938732  | -3.756785 | 9.382086  |
| 6        | 2.154523  | -2.812149 | 7.945759  |
| 1        | 1.473181  | -3.262886 | 8.678410  |
| 1        | 2.647293  | -3.623625 | 7.397487  |
| 6        | 1.435257  | -1.928773 | 6.943604  |

|   |           |           |           |
|---|-----------|-----------|-----------|
| 1 | 2.171632  | -1.559969 | 6.223651  |
| 1 | 0.707194  | -2.542656 | 6.392503  |
| 6 | 5.616241  | -0.202635 | 10.505851 |
| 1 | 6.416226  | -0.842157 | 10.901791 |
| 1 | 5.756668  | 0.795959  | 10.935332 |
| 6 | 5.796059  | -0.032705 | 8.993377  |
| 6 | -0.403626 | -1.157261 | 8.358951  |
| 1 | -0.929661 | -2.013610 | 7.918279  |
| 1 | -1.115738 | -0.326452 | 8.395870  |
| 6 | -0.067661 | -1.468372 | 9.822041  |
| 6 | 4.022880  | -0.314004 | 12.322622 |
| 1 | 4.927044  | -0.405123 | 12.938022 |
| 1 | 3.293345  | -1.018381 | 12.736989 |
| 6 | 3.421791  | 1.062576  | 12.470344 |
| 6 | 3.628273  | 1.831729  | 13.620138 |
| 1 | 4.319359  | 1.486802  | 14.381841 |
| 6 | 2.929530  | 3.026960  | 13.766776 |
| 1 | 3.073862  | 3.641825  | 14.649627 |
| 6 | 2.034453  | 3.418120  | 12.770621 |
| 1 | 1.454738  | 4.329613  | 12.847743 |
| 6 | 1.892757  | 2.607254  | 11.648039 |
| 6 | 0.912684  | 2.950032  | 10.538434 |
| 6 | 0.341286  | 0.154370  | 6.441777  |
| 1 | -0.463866 | 0.795641  | 6.815403  |
| 1 | -0.068073 | -0.407593 | 5.591816  |
| 6 | 1.442739  | 1.078565  | 5.974528  |
| 6 | 1.520986  | 1.525001  | 4.651632  |
| 1 | 0.851416  | 1.116485  | 3.902257  |
| 6 | 2.457874  | 2.502997  | 4.325434  |
| 1 | 2.540104  | 2.863397  | 3.304717  |
| 6 | 3.274864  | 3.027367  | 5.327437  |
| 1 | 3.995688  | 3.810299  | 5.126234  |
| 6 | 3.146751  | 2.526105  | 6.620518  |
| 6 | 3.945796  | 3.098607  | 7.783347  |

Output energies:

|                                              |                             |
|----------------------------------------------|-----------------------------|
| Zero-point correction=                       | 0.439464 (Hartree/Particle) |
| Thermal correction to Energy=                | 0.471591                    |
| Thermal correction to Enthalpy=              | 0.472535                    |
| Thermal correction to Gibbs Free Energy=     | 0.376007                    |
| Sum of electronic and zero-point Energies=   | -1787.704099                |
| Sum of electronic and thermal Energies=      | -1787.671972                |
| Sum of electronic and thermal Enthalpies=    | -1787.671028                |
| Sum of electronic and thermal Free Energies= | -1787.767556                |



(18) Lu-Oxyaapa, N1<sup>S</sup>N2<sup>S</sup>( $\delta\lambda$ ), enantiomer of N1<sup>R</sup>N2<sup>R</sup>( $\lambda\delta$ )

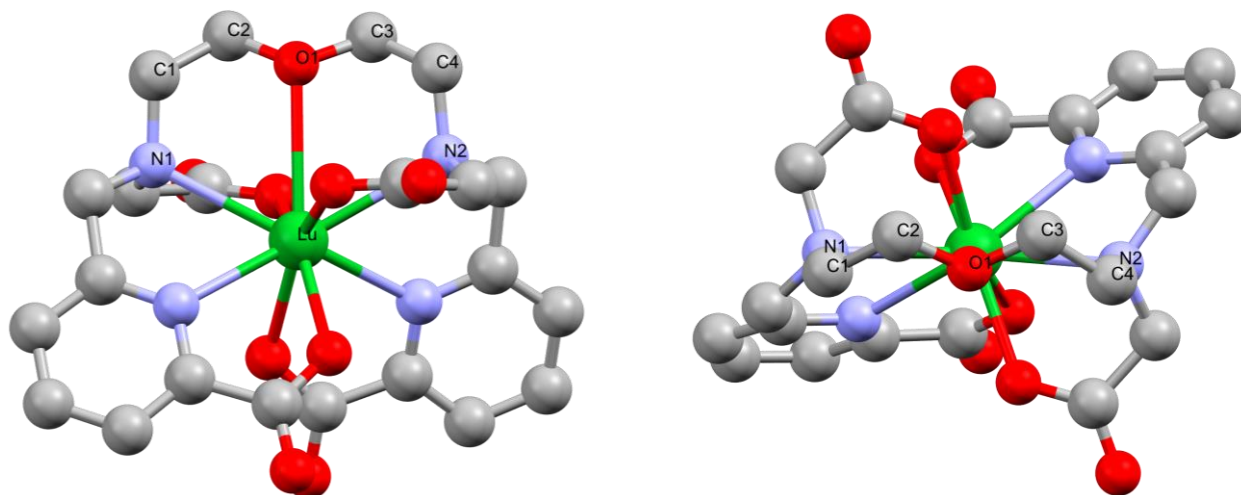

**Figure S113.** Side view (left) and top view (right) of optimized Lu-Oxyaapa complex in N1<sup>S</sup>N2<sup>S</sup>( $\delta\lambda$ ) conformation. Hydrogen atoms are omitted for clarity.

Optimized Cartesian coordinates in Å:

| Atomic # | x         | y         | z         |
|----------|-----------|-----------|-----------|
| 71       | 2.449122  | 0.420307  | 9.259597  |
| 8        | 2.789708  | -2.502074 | 9.090892  |
| 8        | 4.485161  | -0.183644 | 8.226888  |
| 8        | 0.468502  | -0.607891 | 10.015263 |
| 8        | 0.961299  | 2.218291  | 9.694717  |
| 8        | 3.688355  | 2.451298  | 8.959569  |
| 8        | 6.726998  | -0.315280 | 8.304924  |
| 8        | -1.758064 | -0.795807 | 9.762567  |
| 8        | 0.469801  | 4.123510  | 10.787053 |
| 8        | 3.872384  | 4.465632  | 7.973810  |
| 7        | 4.288475  | -0.784317 | 10.948792 |
| 7        | 0.928938  | -0.997313 | 7.359272  |
| 7        | 2.689550  | 1.463804  | 11.593752 |
| 7        | 2.206489  | 1.493040  | 6.938131  |
| 6        | 4.270707  | -2.274840 | 10.933041 |
| 1        | 3.442305  | -2.597390 | 11.569466 |
| 1        | 5.198727  | -2.672495 | 11.371164 |
| 6        | 4.065242  | -2.911480 | 9.570840  |
| 1        | 4.851939  | -2.652322 | 8.853945  |
| 1        | 4.085902  | -4.003664 | 9.698996  |
| 6        | 2.492715  | -2.923129 | 7.761013  |
| 1        | 2.544162  | -4.019076 | 7.691089  |
| 1        | 3.227452  | -2.505396 | 7.058924  |
| 6        | 1.079562  | -2.473610 | 7.438517  |

|   |           |           |           |
|---|-----------|-----------|-----------|
| 1 | 0.750913  | -2.946439 | 6.502023  |
| 1 | 0.420998  | -2.846293 | 8.227403  |
| 6 | 5.552119  | -0.265014 | 10.383866 |
| 1 | 6.419953  | -0.811151 | 10.778066 |
| 1 | 5.661265  | 0.782125  | 10.688881 |
| 6 | 5.607697  | -0.271782 | 8.850352  |
| 6 | -0.427273 | -0.605389 | 7.782401  |
| 1 | -1.206089 | -1.205019 | 7.291324  |
| 1 | -0.597930 | 0.439470  | 7.497835  |
| 6 | -0.605248 | -0.690029 | 9.305320  |
| 6 | 4.144511  | -0.338839 | 12.353857 |
| 1 | 5.092346  | -0.422149 | 12.902772 |
| 1 | 3.438426  | -1.014763 | 12.848729 |
| 6 | 3.583891  | 1.054696  | 12.505551 |
| 6 | 3.910566  | 1.844376  | 13.613658 |
| 1 | 4.645897  | 1.490785  | 14.328575 |
| 6 | 3.275703  | 3.071507  | 13.780269 |
| 1 | 3.510640  | 3.699819  | 14.633730 |
| 6 | 2.335767  | 3.484174  | 12.835427 |
| 1 | 1.814660  | 4.429469  | 12.922357 |
| 6 | 2.078407  | 2.654411  | 11.748157 |
| 6 | 1.087931  | 3.047919  | 10.666522 |
| 6 | 1.215877  | -0.529674 | 5.992665  |
| 1 | 0.392262  | -0.764866 | 5.302885  |
| 1 | 2.093684  | -1.076082 | 5.628244  |
| 6 | 1.549442  | 0.942193  | 5.905560  |
| 6 | 1.275796  | 1.671301  | 4.742521  |
| 1 | 0.731787  | 1.202309  | 3.929614  |
| 6 | 1.720889  | 2.986367  | 4.646229  |
| 1 | 1.521864  | 3.569839  | 3.752711  |
| 6 | 2.434495  | 3.540359  | 5.708845  |
| 1 | 2.818126  | 4.552684  | 5.676241  |
| 6 | 2.655786  | 2.760081  | 6.840039  |
| 6 | 3.463985  | 3.287804  | 8.013809  |

Output energies:

|                                              |                             |
|----------------------------------------------|-----------------------------|
| Zero-point correction=                       | 0.439050 (Hartree/Particle) |
| Thermal correction to Energy=                | 0.471123                    |
| Thermal correction to Enthalpy=              | 0.472067                    |
| Thermal correction to Gibbs Free Energy=     | 0.375558                    |
| Sum of electronic and zero-point Energies=   | -1787.704166                |
| Sum of electronic and thermal Energies=      | -1787.672093                |
| Sum of electronic and thermal Enthalpies=    | -1787.671149                |
| Sum of electronic and thermal Free Energies= | -1787.767657                |

(19) Lu-Oxyaapa, N1<sup>S</sup>N2<sup>S</sup>( $\lambda\delta$ ), enantiomer of N1<sup>R</sup>N2<sup>R</sup>( $\delta\lambda$ )

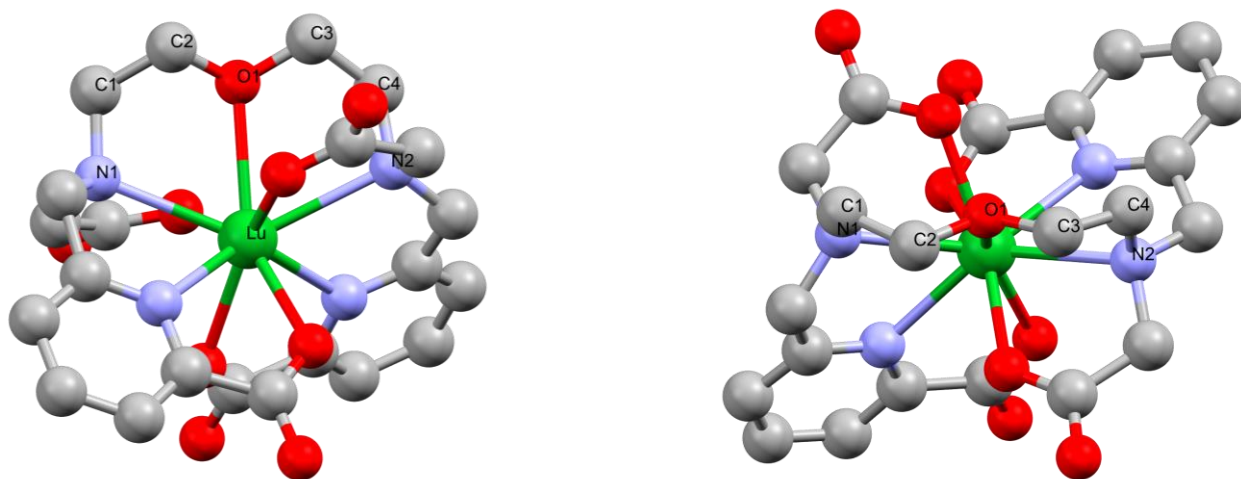

**Figure S114.** Side view (left) and top view (right) of optimized Lu-Oxyaapa complex in N1<sup>S</sup>N2<sup>S</sup>( $\lambda\delta$ ) conformation. Hydrogen atoms are omitted for clarity.

Optimized Cartesian coordinates in Å:

| Atomic # | x         | y         | z         |
|----------|-----------|-----------|-----------|
| 71       | 2.572132  | 0.470596  | 9.120721  |
| 8        | 3.086581  | -2.093709 | 8.765570  |
| 8        | 4.720272  | 0.208159  | 8.118946  |
| 8        | 0.971775  | -0.776715 | 10.303361 |
| 8        | 0.889571  | 2.124963  | 9.583237  |
| 8        | 3.649927  | 2.667388  | 8.857854  |
| 8        | 6.875022  | 0.825044  | 8.315051  |
| 8        | -0.864548 | -2.054312 | 10.503268 |
| 8        | 0.177513  | 3.881086  | 10.799535 |
| 8        | 4.726492  | 4.040831  | 7.434157  |
| 7        | 4.526521  | -0.519540 | 10.711023 |
| 7        | 0.768308  | -0.751344 | 7.532210  |
| 7        | 2.642495  | 1.406984  | 11.469406 |
| 7        | 2.236931  | 1.561926  | 6.858396  |
| 6        | 4.813490  | -1.948820 | 10.405717 |
| 1        | 5.260386  | -2.449847 | 11.275004 |
| 1        | 5.553662  | -1.987483 | 9.603435  |
| 6        | 3.588187  | -2.720665 | 9.955750  |
| 1        | 3.875020  | -3.756488 | 9.734962  |
| 1        | 2.803019  | -2.733022 | 10.721722 |
| 6        | 2.063138  | -2.840039 | 8.102454  |
| 1        | 1.311559  | -3.182174 | 8.823567  |
| 1        | 2.501629  | -3.731840 | 7.636034  |
| 6        | 1.459197  | -1.966512 | 7.019804  |

|   |           |           |           |
|---|-----------|-----------|-----------|
| 1 | 2.255224  | -1.639835 | 6.343384  |
| 1 | 0.756880  | -2.578975 | 6.434404  |
| 6 | 5.678649  | 0.315114  | 10.320255 |
| 1 | 6.624540  | -0.075418 | 10.719552 |
| 1 | 5.543586  | 1.321339  | 10.731829 |
| 6 | 5.784793  | 0.457679  | 8.794766  |
| 6 | -0.402042 | -1.112016 | 8.359156  |
| 1 | -0.935644 | -1.981539 | 7.954452  |
| 1 | -1.104686 | -0.272556 | 8.355399  |
| 6 | -0.074455 | -1.359498 | 9.835552  |
| 6 | 4.196468  | -0.345256 | 12.136549 |
| 1 | 5.090495  | -0.423977 | 12.771101 |
| 1 | 3.526869  | -1.162413 | 12.429640 |
| 6 | 3.476557  | 0.953572  | 12.418340 |
| 6 | 3.608103  | 1.609104  | 13.647147 |
| 1 | 4.301255  | 1.228456  | 14.389710 |
| 6 | 2.837333  | 2.741591  | 13.894989 |
| 1 | 2.924040  | 3.268002  | 14.840330 |
| 6 | 1.947679  | 3.186449  | 12.917207 |
| 1 | 1.314532  | 4.051578  | 13.070647 |
| 6 | 1.879698  | 2.489236  | 11.714028 |
| 6 | 0.901465  | 2.882730  | 10.620468 |
| 6 | 0.365507  | 0.085833  | 6.378435  |
| 1 | -0.484129 | 0.704282  | 6.686555  |
| 1 | 0.016856  | -0.527620 | 5.537214  |
| 6 | 1.438669  | 1.043728  | 5.913703  |
| 6 | 1.512110  | 1.470662  | 4.583587  |
| 1 | 0.863986  | 1.025343  | 3.836246  |
| 6 | 2.415832  | 2.475422  | 4.247927  |
| 1 | 2.491353  | 2.823700  | 3.222511  |
| 6 | 3.213483  | 3.037515  | 5.245399  |
| 1 | 3.914192  | 3.835983  | 5.034712  |
| 6 | 3.097590  | 2.549546  | 6.544194  |
| 6 | 3.904654  | 3.137839  | 7.693194  |

Output energies:

|                                              |                             |
|----------------------------------------------|-----------------------------|
| Zero-point correction=                       | 0.439235 (Hartree/Particle) |
| Thermal correction to Energy=                | 0.471140                    |
| Thermal correction to Enthalpy=              | 0.472084                    |
| Thermal correction to Gibbs Free Energy=     | 0.376889                    |
| Sum of electronic and zero-point Energies=   | -1787.707970                |
| Sum of electronic and thermal Energies=      | -1787.676065                |
| Sum of electronic and thermal Enthalpies=    | -1787.675121                |
| Sum of electronic and thermal Free Energies= | -1787.770315                |

(20) Lu-Oxyaapa, N1<sup>S</sup>N2<sup>S</sup>( $\lambda\lambda$ ), enantiomer of N1<sup>R</sup>N2<sup>R</sup>( $\delta\delta$ )

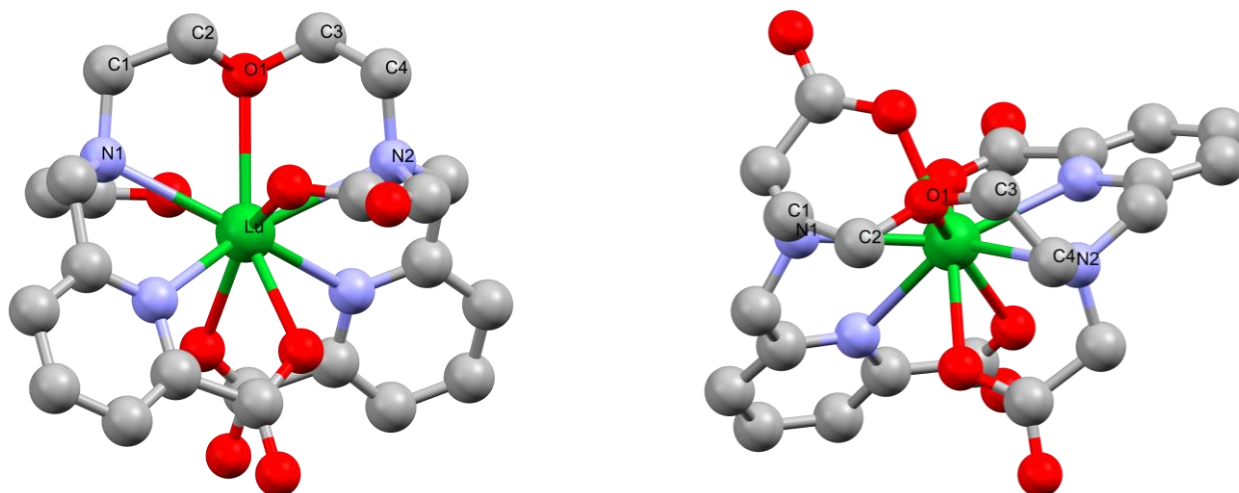

**Figure S115.** Side view (left) and top view (right) of optimized Lu-Oxyaapa complex in N1<sup>S</sup>N2<sup>S</sup>( $\lambda\lambda$ ) conformation. Hydrogen atoms are omitted for clarity.

Optimized Cartesian coordinates in Å:

| Atomic # | x         | y         | z         |
|----------|-----------|-----------|-----------|
| 71       | 2.809278  | 0.383142  | 9.012425  |
| 8        | 3.260969  | -2.178542 | 8.610059  |
| 8        | 5.071457  | 0.008102  | 8.305940  |
| 8        | 0.943819  | -0.624615 | 10.163770 |
| 8        | 1.251888  | 2.199149  | 9.353756  |
| 8        | 3.942740  | 2.467096  | 8.669563  |
| 8        | 7.261436  | 0.168013  | 8.800458  |
| 8        | -1.302281 | -0.554819 | 10.297266 |
| 8        | 0.818564  | 4.155335  | 10.381918 |
| 8        | 4.269715  | 4.359610  | 7.498823  |
| 7        | 4.440527  | -0.806417 | 10.828183 |
| 7        | 0.938487  | -0.877636 | 7.486521  |
| 7        | 2.775271  | 1.359481  | 11.369412 |
| 7        | 2.325239  | 1.464344  | 6.768597  |
| 6        | 4.591363  | -2.266288 | 10.564304 |
| 1        | 4.788807  | -2.811362 | 11.496532 |
| 1        | 5.460607  | -2.413585 | 9.918697  |
| 6        | 3.383476  | -2.864177 | 9.865604  |
| 1        | 3.558950  | -3.932005 | 9.688659  |
| 1        | 2.467965  | -2.750778 | 10.456977 |
| 6        | 2.492528  | -2.819594 | 7.583006  |
| 1        | 2.540677  | -3.908127 | 7.698454  |
| 1        | 2.980487  | -2.559940 | 6.638467  |
| 6        | 1.048373  | -2.355889 | 7.604548  |

|   |           |           |           |
|---|-----------|-----------|-----------|
| 1 | 0.487009  | -2.855277 | 6.801127  |
| 1 | 0.595774  | -2.661614 | 8.549377  |
| 6 | 5.724819  | -0.113954 | 10.609352 |
| 1 | 6.552347  | -0.610965 | 11.133056 |
| 1 | 5.651848  | 0.902137  | 11.013417 |
| 6 | 6.065067  | 0.020069  | 9.120576  |
| 6 | -0.313763 | -0.431829 | 8.123016  |
| 1 | -1.183156 | -0.996484 | 7.757971  |
| 1 | -0.485439 | 0.622294  | 7.881953  |
| 6 | -0.235795 | -0.553714 | 9.652301  |
| 6 | 3.959551  | -0.585377 | 12.204968 |
| 1 | 4.744133  | -0.797618 | 12.944999 |
| 1 | 3.144145  | -1.293369 | 12.393531 |
| 6 | 3.413111  | 0.806597  | 12.411307 |
| 6 | 3.490059  | 1.454253  | 13.648459 |
| 1 | 4.023868  | 0.987689  | 14.469502 |
| 6 | 2.871503  | 2.692579  | 13.801212 |
| 1 | 2.921976  | 3.217745  | 14.749887 |
| 6 | 2.176050  | 3.242912  | 12.724393 |
| 1 | 1.660124  | 4.192182  | 12.800981 |
| 6 | 2.146373  | 2.538943  | 11.523401 |
| 6 | 1.346485  | 3.025453  | 10.328577 |
| 6 | 1.008395  | -0.470368 | 6.070549  |
| 1 | 0.050518  | -0.631738 | 5.556951  |
| 1 | 1.741787  | -1.110774 | 5.568077  |
| 6 | 1.458100  | 0.959189  | 5.876579  |
| 6 | 1.034699  | 1.699621  | 4.767220  |
| 1 | 0.322176  | 1.267824  | 4.072374  |
| 6 | 1.540050  | 2.981777  | 4.577119  |
| 1 | 1.228019  | 3.573350  | 3.722035  |
| 6 | 2.444619  | 3.499085  | 5.504244  |
| 1 | 2.859696  | 4.494088  | 5.402920  |
| 6 | 2.804561  | 2.712959  | 6.595032  |
| 6 | 3.750685  | 3.236432  | 7.663174  |

Output energies:

|                                              |                             |
|----------------------------------------------|-----------------------------|
| Zero-point correction=                       | 0.439449 (Hartree/Particle) |
| Thermal correction to Energy=                | 0.471353                    |
| Thermal correction to Enthalpy=              | 0.472297                    |
| Thermal correction to Gibbs Free Energy=     | 0.376354                    |
| Sum of electronic and zero-point Energies=   | -1787.700581                |
| Sum of electronic and thermal Energies=      | -1787.668678                |
| Sum of electronic and thermal Enthalpies=    | -1787.667733                |
| Sum of electronic and thermal Free Energies= | -1787.763677                |

(21) Lu-Oxyaapa,  $N1^S N2^R(\delta\delta)$ , enantiomer of  $N1^R N2^S(\lambda\lambda)$

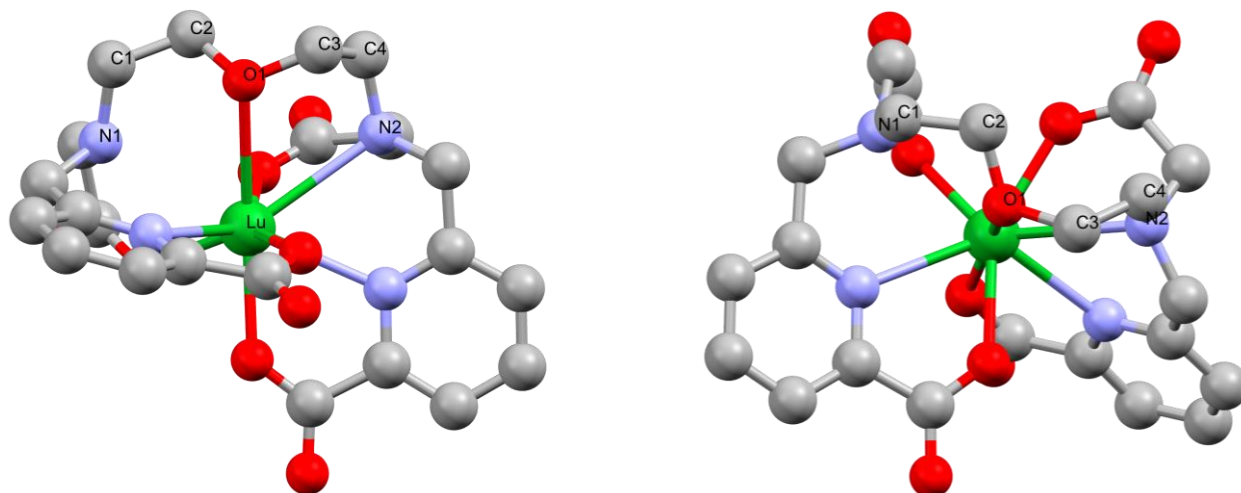

**Figure S116.** Side view (left) and top view (right) of optimized Lu-Oxyaapa complex in  $N1^S N2^R(\delta\delta)$  conformation. Hydrogen atoms are omitted for clarity.

Optimized Cartesian coordinates in Å:

| Atomic # | x         | y         | z         |
|----------|-----------|-----------|-----------|
| 6        | 3.227598  | 1.800000  | -0.447547 |
| 6        | 3.729165  | 0.428838  | -0.050046 |
| 6        | 5.094762  | 0.179182  | 0.129508  |
| 6        | 5.502710  | -1.078791 | 0.564513  |
| 6        | 4.538092  | -2.052856 | 0.819932  |
| 6        | 3.199272  | -1.727314 | 0.615506  |
| 6        | 2.088863  | -2.706414 | 0.934994  |
| 8        | 2.384985  | -3.860479 | 1.295621  |
| 6        | 1.331508  | 3.042780  | -1.350768 |
| 8        | -0.650809 | 2.536964  | 0.040144  |
| 6        | -1.737710 | 2.722005  | -0.880209 |
| 6        | -2.951429 | 1.983993  | -0.338854 |
| 7        | -2.741398 | 0.527752  | -0.246762 |
| 6        | -3.526315 | -0.069827 | 0.840730  |
| 6        | -2.882958 | 0.132363  | 2.193073  |
| 6        | -3.652586 | 0.284620  | 3.352724  |
| 6        | -3.009985 | 0.439775  | 4.577832  |
| 6        | -1.616038 | 0.473474  | 4.610533  |
| 6        | -0.922935 | 0.337087  | 3.409403  |
| 6        | 0.583582  | 0.481167  | 3.345536  |
| 8        | 1.229687  | 0.539003  | 4.410029  |
| 6        | -2.980109 | -0.178276 | -1.503224 |
| 8        | 1.086468  | 0.564962  | 2.165848  |
| 7        | -1.543099 | 0.141062  | 2.233086  |

|    |           |           |           |
|----|-----------|-----------|-----------|
| 8  | 0.890570  | -2.248666 | 0.820569  |
| 7  | 2.808008  | -0.519984 | 0.172821  |
| 1  | -4.559092 | 0.310010  | 0.861865  |
| 1  | -3.599174 | -1.147888 | 0.662758  |
| 1  | -3.157786 | 2.364953  | 0.665718  |
| 1  | -3.826579 | 2.231701  | -0.960431 |
| 1  | -1.971755 | 3.792073  | -0.958216 |
| 1  | -1.463018 | 2.361149  | -1.878618 |
| 1  | -1.069056 | 0.623483  | 5.533400  |
| 1  | -3.586373 | 0.556566  | 5.490361  |
| 1  | -4.735470 | 0.288237  | 3.283096  |
| 1  | 4.801827  | -3.042017 | 1.173862  |
| 1  | 6.556762  | -1.295707 | 0.707398  |
| 1  | 5.816549  | 0.963805  | -0.071737 |
| 71 | 0.168845  | -0.153297 | 0.088300  |
| 7  | 1.986144  | 1.722732  | -1.226227 |
| 1  | 4.020633  | 2.340861  | -0.987196 |
| 1  | 3.029508  | 2.368018  | 0.468896  |
| 6  | 2.233481  | 1.152322  | -2.556795 |
| 6  | 0.467076  | 3.414155  | -0.153744 |
| 1  | 0.107437  | 4.444274  | -0.278751 |
| 1  | 1.038280  | 3.367572  | 0.777295  |
| 1  | 0.706131  | 3.026853  | -2.247774 |
| 1  | 2.075974  | 3.840341  | -1.506642 |
| 6  | -2.307243 | -1.557707 | -1.517362 |
| 1  | -2.547823 | 0.396160  | -2.328199 |
| 1  | -4.050945 | -0.304336 | -1.728117 |
| 8  | -1.373615 | -1.763526 | -0.653057 |
| 8  | -2.685908 | -2.388483 | -2.366086 |
| 6  | 1.010097  | 0.423425  | -3.109592 |
| 1  | 3.029251  | 0.402641  | -2.490069 |
| 1  | 2.572984  | 1.906677  | -3.279306 |
| 8  | 0.886411  | 0.304141  | -4.343249 |
| 8  | 0.201415  | -0.076662 | -2.241134 |

Output energies:

|                                              |                             |
|----------------------------------------------|-----------------------------|
| Zero-point correction=                       | 0.438008 (Hartree/Particle) |
| Thermal correction to Energy=                | 0.469730                    |
| Thermal correction to Enthalpy=              | 0.470674                    |
| Thermal correction to Gibbs Free Energy=     | 0.374984                    |
| Sum of electronic and zero-point Energies=   | -1787.698875                |
| Sum of electronic and thermal Energies=      | -1787.667153                |
| Sum of electronic and thermal Enthalpies=    | -1787.666209                |
| Sum of electronic and thermal Free Energies= | -1787.761900                |



(22) Lu-Oxyaapa, N1<sup>S</sup>N2<sup>R</sup>( $\delta\lambda$ ), enantiomer of N1<sup>R</sup>N2<sup>S</sup>( $\lambda\delta$ )

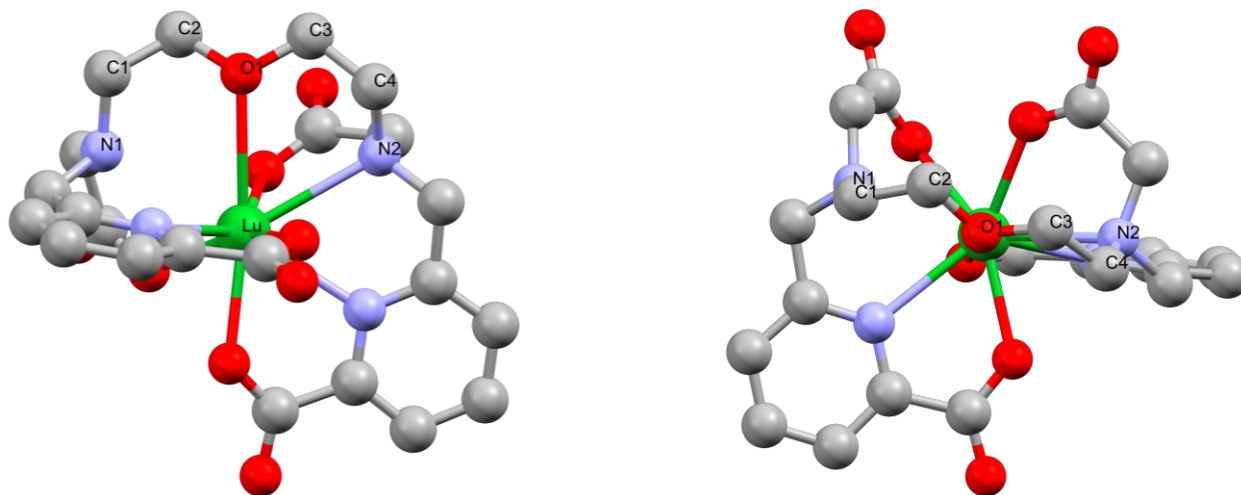

**Figure S117.** Side view (left) and top view (right) of optimized Lu-Oxyaapa complex in N1<sup>S</sup>N2<sup>R</sup>( $\delta\lambda$ ) conformation. Hydrogen atoms are omitted for clarity.

Optimized Cartesian coordinates in Å:

| Atomic # | x         | y         | z         |
|----------|-----------|-----------|-----------|
| 6        | 3.364765  | 1.666799  | -0.139155 |
| 6        | 3.720628  | 0.208599  | 0.035365  |
| 6        | 5.040553  | -0.250297 | -0.022775 |
| 6        | 5.303383  | -1.591672 | 0.249083  |
| 6        | 4.249404  | -2.435380 | 0.599180  |
| 6        | 2.963538  | -1.901547 | 0.643050  |
| 6        | 1.771217  | -2.705722 | 1.125291  |
| 8        | 1.911433  | -3.923035 | 1.346837  |
| 6        | 1.558626  | 3.208106  | -0.588473 |
| 8        | -0.777744 | 2.614584  | -0.574746 |
| 6        | -2.036385 | 2.640254  | -1.253815 |
| 6        | -3.047758 | 1.816431  | -0.477018 |
| 7        | -2.675607 | 0.394300  | -0.338581 |
| 6        | -3.391742 | -0.223665 | 0.786536  |
| 6        | -2.818240 | 0.194517  | 2.118786  |
| 6        | -3.619974 | 0.320746  | 3.258523  |
| 6        | -3.027987 | 0.677213  | 4.466950  |
| 6        | -1.655383 | 0.923835  | 4.503011  |
| 6        | -0.928871 | 0.793485  | 3.322418  |
| 6        | 0.550668  | 1.106465  | 3.254385  |
| 8        | 1.164200  | 1.368443  | 4.306484  |
| 6        | -2.902354 | -0.372085 | -1.566364 |
| 8        | 1.063162  | 1.095623  | 2.075693  |
| 7        | -1.496769 | 0.419744  | 2.161640  |

|    |           |           |           |
|----|-----------|-----------|-----------|
| 8  | 0.690644  | -2.030655 | 1.303983  |
| 7  | 2.708251  | -0.618108 | 0.335956  |
| 1  | -4.469425 | -0.001331 | 0.758833  |
| 1  | -3.293248 | -1.311124 | 0.699044  |
| 1  | -3.136568 | 2.243463  | 0.526108  |
| 1  | -4.032152 | 1.929417  | -0.959095 |
| 1  | -2.404415 | 3.673945  | -1.315669 |
| 1  | -1.905990 | 2.273840  | -2.280840 |
| 1  | -1.151731 | 1.221782  | 5.414431  |
| 1  | -3.629855 | 0.776940  | 5.364805  |
| 1  | -4.688212 | 0.145026  | 3.186869  |
| 1  | 4.408654  | -3.478238 | 0.845157  |
| 1  | 6.319073  | -1.971617 | 0.199719  |
| 1  | 5.840851  | 0.437183  | -0.274916 |
| 71 | 0.185596  | 0.001544  | 0.162394  |
| 7  | 2.072052  | 1.839795  | -0.828078 |
| 1  | 4.177686  | 2.195870  | -0.656250 |
| 1  | 3.280064  | 2.107548  | 0.859699  |
| 6  | 2.234274  | 1.565321  | -2.269428 |
| 6  | 0.190545  | 3.467273  | -1.189732 |
| 1  | 0.190058  | 3.308920  | -2.275793 |
| 1  | -0.075049 | 4.519028  | -1.013245 |
| 1  | 2.250970  | 3.960446  | -0.999767 |
| 1  | 1.509236  | 3.362259  | 0.493257  |
| 6  | -2.083112 | -1.667952 | -1.621851 |
| 1  | -2.595387 | 0.227336  | -2.428335 |
| 1  | -3.964542 | -0.619147 | -1.717310 |
| 8  | -1.111357 | -1.792426 | -0.789758 |
| 8  | -2.395800 | -2.511235 | -2.487176 |
| 6  | 1.010475  | 0.924912  | -2.925642 |
| 1  | 3.044679  | 0.839179  | -2.398607 |
| 1  | 2.526821  | 2.466335  | -2.823692 |
| 8  | 0.811161  | 1.123525  | -4.139984 |
| 8  | 0.295495  | 0.155626  | -2.181804 |

Output energies:

|                                              |                             |
|----------------------------------------------|-----------------------------|
| Zero-point correction=                       | 0.438476 (Hartree/Particle) |
| Thermal correction to Energy=                | 0.470079                    |
| Thermal correction to Enthalpy=              | 0.471023                    |
| Thermal correction to Gibbs Free Energy=     | 0.375714                    |
| Sum of electronic and zero-point Energies=   | -1787.704099                |
| Sum of electronic and thermal Energies=      | -1787.672496                |
| Sum of electronic and thermal Enthalpies=    | -1787.671552                |
| Sum of electronic and thermal Free Energies= | -1787.766861                |

(23) Lu-Oxyaapa,  $N1^S N2^R(\lambda\delta)$ , enantiomer of  $N1^R N2^S(\delta\lambda)$

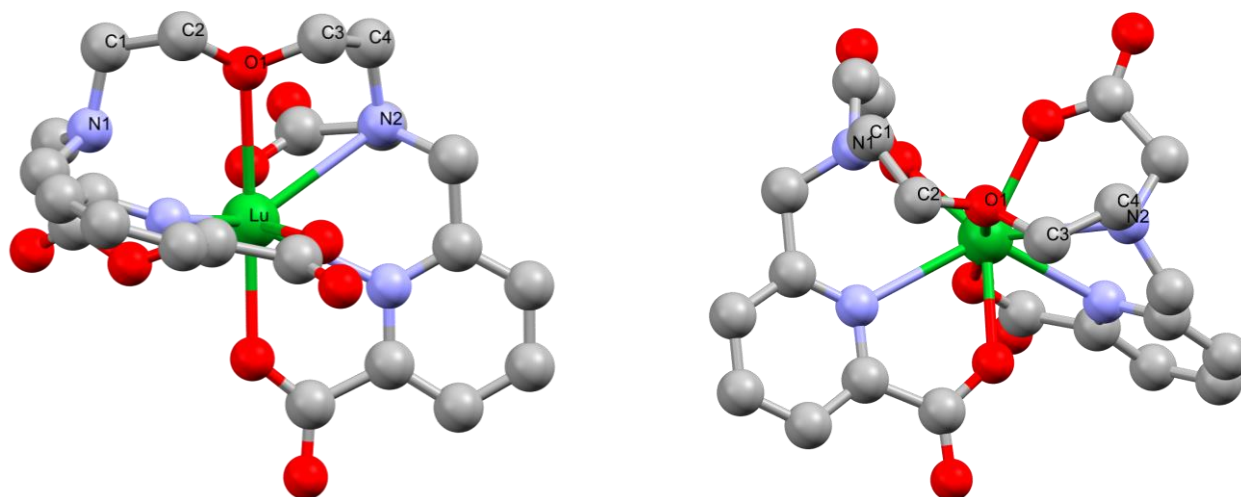

**Figure S118.** Side view (left) and top view (right) of optimized Lu-Oxyaapa complex in  $N1^S N2^R(\lambda\delta)$  conformation. Hydrogen atoms are omitted for clarity.

Optimized Cartesian coordinates in Å:

| Atomic # | x         | y         | z         |
|----------|-----------|-----------|-----------|
| 6        | 3.260478  | 1.781734  | -0.326330 |
| 6        | 3.767159  | 0.408566  | 0.046871  |
| 6        | 5.125998  | 0.170828  | 0.281540  |
| 6        | 5.531207  | -1.097212 | 0.689410  |
| 6        | 4.568947  | -2.090659 | 0.866506  |
| 6        | 3.236409  | -1.773384 | 0.614065  |
| 6        | 2.119001  | -2.761977 | 0.864619  |
| 8        | 2.401186  | -3.924850 | 1.208539  |
| 6        | 1.421006  | 3.032653  | -1.312556 |
| 8        | -0.676787 | 2.323399  | -0.438622 |
| 6        | -1.990711 | 2.742758  | -0.044264 |
| 6        | -3.007762 | 1.879139  | -0.781987 |
| 7        | -2.826190 | 0.441472  | -0.549467 |
| 6        | -3.574256 | -0.071205 | 0.599547  |
| 6        | -2.946867 | 0.243104  | 1.939669  |
| 6        | -3.750435 | 0.498985  | 3.058067  |
| 6        | -3.148212 | 0.750241  | 4.287011  |
| 6        | -1.756361 | 0.771065  | 4.361539  |
| 6        | -1.027538 | 0.525444  | 3.199353  |
| 6        | 0.481558  | 0.641408  | 3.186989  |
| 8        | 1.087602  | 0.793395  | 4.264737  |
| 6        | -3.024502 | -0.401965 | -1.721022 |
| 8        | 1.034153  | 0.603894  | 2.026895  |
| 7        | -1.607651 | 0.237545  | 2.020394  |

|    |           |           |           |
|----|-----------|-----------|-----------|
| 8  | 0.928888  | -2.296399 | 0.713880  |
| 7  | 2.848476  | -0.557974 | 0.192006  |
| 1  | -4.615658 | 0.289227  | 0.599644  |
| 1  | -3.627451 | -1.162315 | 0.514993  |
| 1  | -4.018885 | 2.218905  | -0.503858 |
| 1  | -2.889557 | 2.072183  | -1.852055 |
| 1  | -2.097601 | 2.680947  | 1.044084  |
| 1  | -2.142283 | 3.788351  | -0.340737 |
| 1  | -1.235890 | 0.992476  | 5.285267  |
| 1  | -3.752214 | 0.949381  | 5.166868  |
| 1  | -4.830241 | 0.507340  | 2.951515  |
| 1  | 4.828909  | -3.087997 | 1.199746  |
| 1  | 6.580667  | -1.306168 | 0.872216  |
| 1  | 5.844588  | 0.971674  | 0.142375  |
| 71 | 0.242059  | -0.180429 | -0.034718 |
| 7  | 2.068533  | 1.705069  | -1.182232 |
| 1  | 4.068184  | 2.360748  | -0.799321 |
| 1  | 2.988596  | 2.311074  | 0.594374  |
| 6  | 2.409850  | 1.171674  | -2.511484 |
| 6  | 0.364227  | 3.294904  | -0.255317 |
| 1  | -0.039205 | 4.304003  | -0.400812 |
| 1  | 0.766431  | 3.229106  | 0.763591  |
| 1  | 0.927067  | 3.077266  | -2.287252 |
| 1  | 2.168881  | 3.838998  | -1.292806 |
| 6  | -2.267324 | -1.732634 | -1.608812 |
| 1  | -2.626727 | 0.111010  | -2.602516 |
| 1  | -4.082761 | -0.624211 | -1.932454 |
| 8  | -1.306605 | -1.797989 | -0.756491 |
| 8  | -2.610991 | -2.665336 | -2.363062 |
| 6  | 1.246388  | 0.425884  | -3.166089 |
| 1  | 3.218163  | 0.439420  | -2.411083 |
| 1  | 2.775690  | 1.953031  | -3.189944 |
| 8  | 1.200226  | 0.359437  | -4.408605 |
| 8  | 0.409559  | -0.146512 | -2.370166 |

Output energies:

|                                              |                             |
|----------------------------------------------|-----------------------------|
| Zero-point correction=                       | 0.437933 (Hartree/Particle) |
| Thermal correction to Energy=                | 0.470715                    |
| Thermal correction to Enthalpy=              | 0.471660                    |
| Thermal correction to Gibbs Free Energy=     | 0.371737                    |
| Sum of electronic and zero-point Energies=   | -1787.695364                |
| Sum of electronic and thermal Energies=      | -1787.662581                |
| Sum of electronic and thermal Enthalpies=    | -1787.661637                |
| Sum of electronic and thermal Free Energies= | -1787.761560                |

(24) Lu-Oxyaapa,  $N1^S N2^R(\lambda\lambda)$ , enantiomer of  $N1^R N2^S(\delta\delta)$

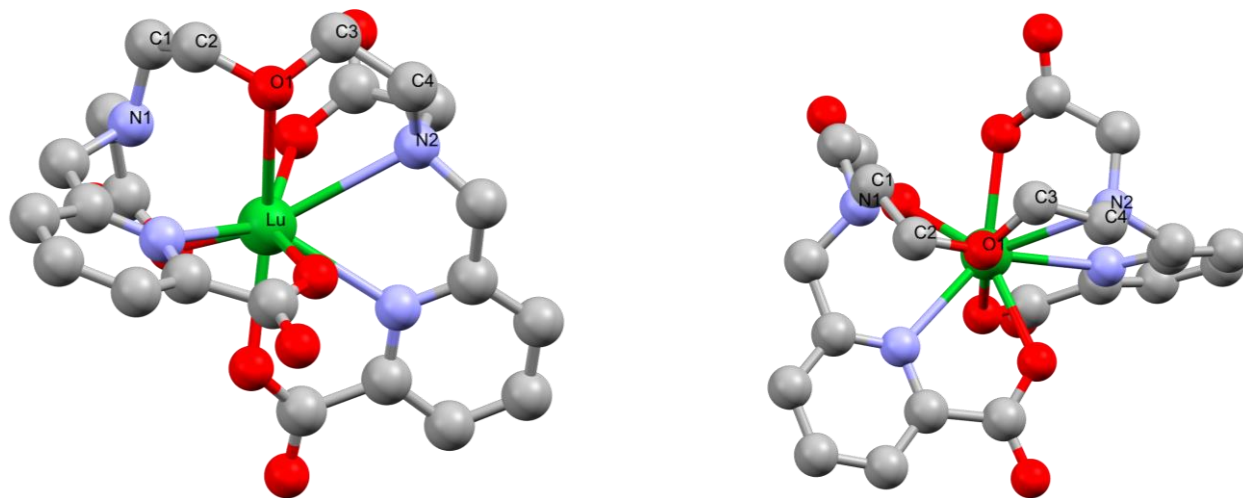

**Figure S119.** Side view (left) and top view (right) of optimized Lu-Oxyaapa complex in  $N1^S N2^R(\lambda\lambda)$  conformation. Hydrogen atoms are omitted for clarity.

Optimized Cartesian coordinates in Å:

| Atomic # | x         | y         | z         |
|----------|-----------|-----------|-----------|
| 6        | 3.373544  | 1.661772  | -0.255214 |
| 6        | 3.768002  | 0.213318  | -0.073326 |
| 6        | 5.097310  | -0.208587 | -0.178533 |
| 6        | 5.413416  | -1.530168 | 0.129935  |
| 6        | 4.402512  | -2.388166 | 0.561305  |
| 6        | 3.101601  | -1.893804 | 0.640072  |
| 6        | 1.963459  | -2.724713 | 1.208186  |
| 8        | 2.175785  | -3.924429 | 1.476517  |
| 6        | 1.513701  | 3.167641  | -0.636116 |
| 8        | -0.717095 | 2.601592  | 0.060227  |
| 6        | -2.141859 | 2.728034  | -0.077623 |
| 6        | -2.743410 | 1.677529  | -1.003935 |
| 7        | -2.516922 | 0.282266  | -0.568743 |
| 6        | -3.377824 | -0.117936 | 0.560667  |
| 6        | -2.849752 | 0.273379  | 1.919212  |
| 6        | -3.723167 | 0.522499  | 2.985143  |
| 6        | -3.197471 | 0.849639  | 4.230646  |
| 6        | -1.813449 | 0.953018  | 4.374743  |
| 6        | -1.012134 | 0.708868  | 3.263990  |
| 6        | 0.486953  | 0.916907  | 3.307499  |
| 8        | 1.037639  | 1.145481  | 4.400689  |
| 6        | -2.722364 | -0.659108 | -1.679692 |
| 8        | 1.078483  | 0.868250  | 2.167870  |
| 7        | -1.519420 | 0.344451  | 2.069714  |

|    |           |           |           |
|----|-----------|-----------|-----------|
| 8  | 0.860803  | -2.098001 | 1.405951  |
| 7  | 2.793949  | -0.631172 | 0.296934  |
| 1  | -4.398921 | 0.273130  | 0.439506  |
| 1  | -3.463005 | -1.210453 | 0.549984  |
| 1  | -3.819611 | 1.891799  | -1.112174 |
| 1  | -2.292433 | 1.789760  | -1.993767 |
| 1  | -2.555589 | 2.662804  | 0.930608  |
| 1  | -2.387105 | 3.722652  | -0.469554 |
| 1  | -1.354563 | 1.237712  | 5.313706  |
| 1  | -3.855968 | 1.045279  | 5.071166  |
| 1  | -4.794680 | 0.467936  | 2.824052  |
| 1  | 4.605734  | -3.413904 | 0.843646  |
| 1  | 6.437041  | -1.882618 | 0.049526  |
| 1  | 5.863341  | 0.493027  | -0.491187 |
| 71 | 0.210581  | -0.083795 | 0.196032  |
| 7  | 2.048539  | 1.808995  | -0.884974 |
| 1  | 4.155375  | 2.197253  | -0.812837 |
| 1  | 3.329058  | 2.112564  | 0.742244  |
| 6  | 2.147248  | 1.524683  | -2.329085 |
| 6  | 0.032164  | 3.325256  | -0.927343 |
| 1  | -0.226033 | 2.988398  | -1.938783 |
| 1  | -0.221176 | 4.391608  | -0.860087 |
| 1  | 2.060064  | 3.914210  | -1.234109 |
| 1  | 1.676619  | 3.409691  | 0.417792  |
| 6  | -1.960144 | -1.972978 | -1.482414 |
| 1  | -2.335898 | -0.214601 | -2.600127 |
| 1  | -3.785079 | -0.881349 | -1.851731 |
| 8  | -0.995760 | -1.969324 | -0.631951 |
| 8  | -2.293280 | -2.951909 | -2.180154 |
| 6  | 0.923465  | 0.828046  | -2.918134 |
| 1  | 2.977705  | 0.828635  | -2.494408 |
| 1  | 2.373008  | 2.430542  | -2.906213 |
| 8  | 0.663452  | 0.992403  | -4.125401 |
| 8  | 0.275788  | 0.044473  | -2.128697 |

Output energies:

|                                              |                             |
|----------------------------------------------|-----------------------------|
| Zero-point correction=                       | 0.438861 (Hartree/Particle) |
| Thermal correction to Energy=                | 0.470317                    |
| Thermal correction to Enthalpy=              | 0.471261                    |
| Thermal correction to Gibbs Free Energy=     | 0.376726                    |
| Sum of electronic and zero-point Energies=   | -1787.700233                |
| Sum of electronic and thermal Energies=      | -1787.668777                |
| Sum of electronic and thermal Enthalpies=    | -1787.667833                |
| Sum of electronic and thermal Free Energies= | -1787.762368                |

(25) La-Oxyaapa,  $N1^S N2^S(\delta\delta)$ , enantiomer of  $N1^R N2^R(\lambda\lambda)$

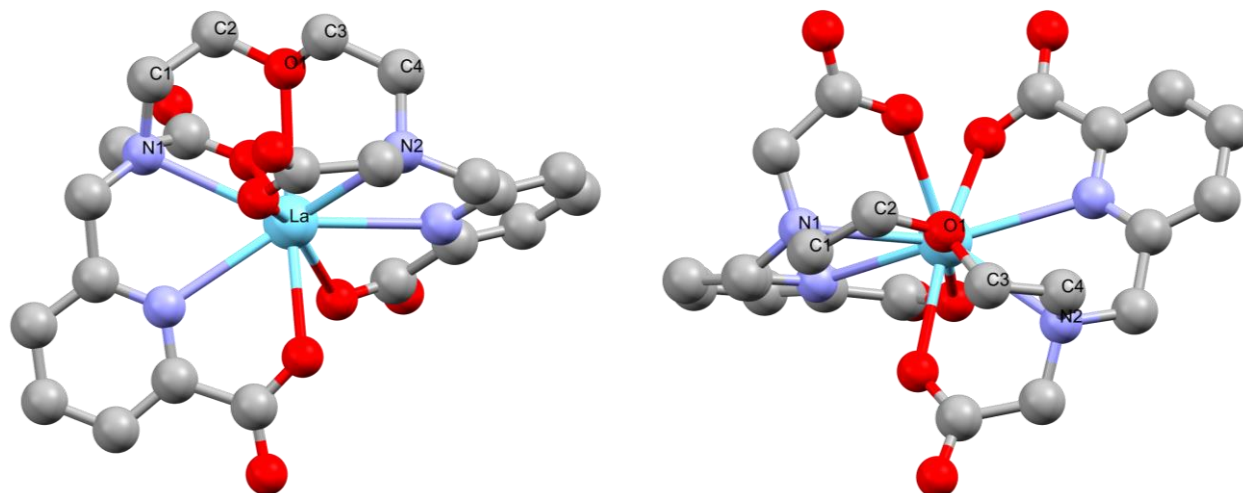

**Figure S120.** Side view (left) and top view (right) of optimized La-Oxyaapa complex in  $N1^S N2^S(\delta\delta)$  conformation. Hydrogen atoms are omitted for clarity.

Optimized Cartesian coordinates in Å:

| Atomic # | x         | y         | z         |
|----------|-----------|-----------|-----------|
| 57       | 2.582813  | 0.804195  | 9.141903  |
| 8        | 3.370004  | -1.757579 | 8.372866  |
| 8        | 5.102772  | 0.642603  | 8.779131  |
| 8        | 0.901719  | -0.748587 | 10.248395 |
| 8        | 1.029960  | 2.661554  | 9.991620  |
| 8        | 3.518323  | 3.103687  | 8.246338  |
| 8        | 7.232255  | 0.134510  | 9.289627  |
| 8        | -0.667553 | -2.352264 | 10.352025 |
| 8        | 0.861182  | 4.563388  | 11.187378 |
| 8        | 4.677419  | 4.065811  | 6.569818  |
| 7        | 4.191396  | -0.720313 | 11.078399 |
| 7        | 0.716258  | -0.707603 | 7.434377  |
| 7        | 2.615881  | 1.539372  | 11.839221 |
| 7        | 2.064221  | 1.648915  | 6.508879  |
| 6        | 4.078100  | -2.148569 | 10.696801 |
| 1        | 3.066859  | -2.481889 | 10.945685 |
| 1        | 4.783243  | -2.764592 | 11.279492 |
| 6        | 4.323992  | -2.427258 | 9.221385  |
| 1        | 5.319692  | -2.109788 | 8.902656  |
| 1        | 4.261764  | -3.508425 | 9.059015  |
| 6        | 2.337872  | -2.610909 | 7.857042  |
| 1        | 1.735987  | -3.024168 | 8.675174  |
| 1        | 2.798287  | -3.451919 | 7.323947  |
| 6        | 1.501813  | -1.829203 | 6.861174  |

|   |           |           |           |
|---|-----------|-----------|-----------|
| 1 | 2.174908  | -1.418475 | 6.102462  |
| 1 | 0.830290  | -2.540317 | 6.354121  |
| 6 | 5.579363  | -0.231970 | 10.971211 |
| 1 | 6.294799  | -0.968479 | 11.362699 |
| 1 | 5.675326  | 0.667842  | 11.589903 |
| 6 | 6.015656  | 0.194050  | 9.563040  |
| 6 | -0.390859 | -1.210213 | 8.272213  |
| 1 | -0.850234 | -2.110383 | 7.842743  |
| 1 | -1.169719 | -0.440820 | 8.312907  |
| 6 | -0.016983 | -1.484159 | 9.735218  |
| 6 | 3.703248  | -0.543733 | 12.462130 |
| 1 | 4.435701  | -0.904072 | 13.198539 |
| 1 | 2.804520  | -1.158235 | 12.581708 |
| 6 | 3.313958  | 0.882782  | 12.779727 |
| 6 | 3.579444  | 1.459140  | 14.025880 |
| 1 | 4.152518  | 0.909392  | 14.765028 |
| 6 | 3.093864  | 2.737408  | 14.295866 |
| 1 | 3.291326  | 3.206775  | 15.254723 |
| 6 | 2.346156  | 3.401277  | 13.324271 |
| 1 | 1.936512  | 4.389096  | 13.496071 |
| 6 | 2.125570  | 2.762806  | 12.104322 |
| 6 | 1.273449  | 3.399089  | 11.014996 |
| 6 | 0.187090  | 0.117794  | 6.326010  |
| 1 | -0.577094 | 0.782829  | 6.742789  |
| 1 | -0.305413 | -0.500366 | 5.561637  |
| 6 | 1.235732  | 0.993438  | 5.679384  |
| 6 | 1.279617  | 1.186933  | 4.295661  |
| 1 | 0.600593  | 0.638877  | 3.651170  |
| 6 | 2.200482  | 2.091413  | 3.769844  |
| 1 | 2.255646  | 2.257475  | 2.698379  |
| 6 | 3.043175  | 2.784402  | 4.637051  |
| 1 | 3.765804  | 3.506044  | 4.276356  |
| 6 | 2.941073  | 2.536801  | 6.005970  |
| 6 | 3.794260  | 3.299817  | 7.011371  |

Output energies:

|                                              |                             |
|----------------------------------------------|-----------------------------|
| Zero-point correction=                       | 0.436503 (Hartree/Particle) |
| Thermal correction to Energy=                | 0.468073                    |
| Thermal correction to Enthalpy=              | 0.469018                    |
| Thermal correction to Gibbs Free Energy=     | 0.371174                    |
| Sum of electronic and zero-point Energies=   | -1779.355698                |
| Sum of electronic and thermal Energies=      | -1779.324127                |
| Sum of electronic and thermal Enthalpies=    | -1779.323183                |
| Sum of electronic and thermal Free Energies= | -1779.421026                |



(26) La-Oxyaapa,  $N1^S N2^S(\delta\lambda)$ , enantiomer of  $N1^R N2^R(\lambda\delta)$

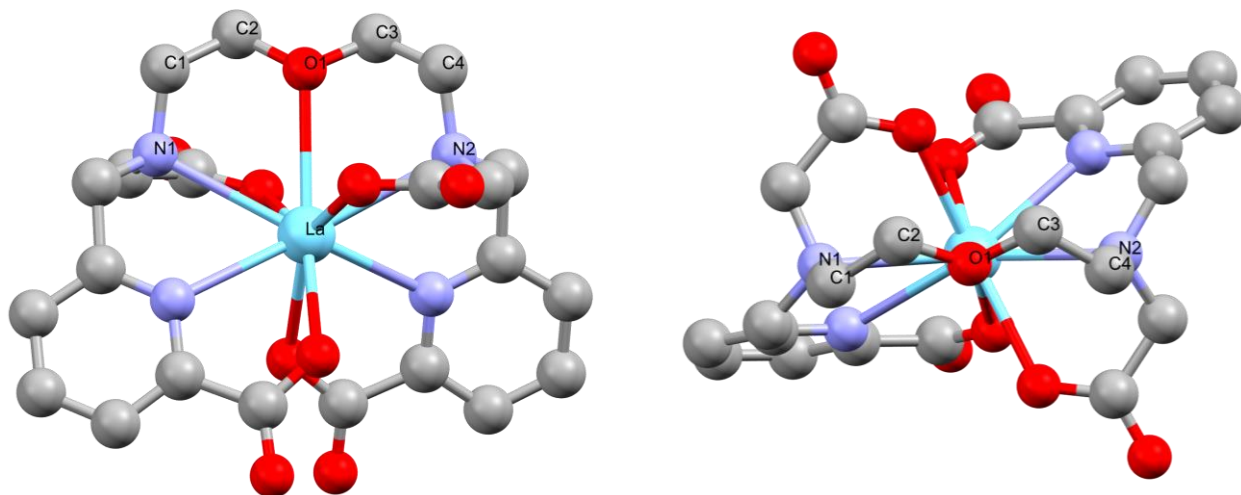

**Figure S121.** Side view (left) and top view (right) of optimized La-Oxyaapa complex in  $N1^S N2^S(\delta\lambda)$  conformation. Hydrogen atoms are omitted for clarity.

Optimized Cartesian coordinates in Å:

| Atomic # | x         | y         | z         |
|----------|-----------|-----------|-----------|
| 57       | 2.398886  | 0.435492  | 9.245404  |
| 8        | 2.828611  | -2.365639 | 9.052791  |
| 8        | 4.773577  | -0.036947 | 8.430631  |
| 8        | 0.143755  | -0.675791 | 9.847279  |
| 8        | 0.856982  | 2.322154  | 10.107021 |
| 8        | 3.515672  | 2.719409  | 8.715634  |
| 8        | 6.975312  | -0.387494 | 8.709642  |
| 8        | -2.031791 | -0.853082 | 9.292796  |
| 8        | 0.735051  | 4.332796  | 11.114376 |
| 8        | 3.496707  | 4.704346  | 7.651807  |
| 7        | 4.288435  | -0.839696 | 11.111307 |
| 7        | 0.942730  | -0.999799 | 7.226332  |
| 7        | 2.749404  | 1.483220  | 11.823496 |
| 7        | 2.154472  | 1.541591  | 6.711397  |
| 6        | 4.197036  | -2.318596 | 11.016937 |
| 1        | 3.317844  | -2.632481 | 11.586719 |
| 1        | 5.076570  | -2.792557 | 11.480349 |
| 6        | 4.048855  | -2.865956 | 9.609115  |
| 1        | 4.895355  | -2.612250 | 8.961285  |
| 1        | 3.997935  | -3.961331 | 9.673644  |
| 6        | 2.547544  | -2.869433 | 7.740753  |
| 1        | 2.615282  | -3.965259 | 7.745312  |
| 1        | 3.291724  | -2.486271 | 7.029149  |
| 6        | 1.131181  | -2.467904 | 7.370803  |

|   |           |           |           |
|---|-----------|-----------|-----------|
| 1 | 0.841078  | -2.987843 | 6.446189  |
| 1 | 0.465069  | -2.824397 | 8.160074  |
| 6 | 5.612154  | -0.353656 | 10.667862 |
| 1 | 6.420755  | -0.956535 | 11.104368 |
| 1 | 5.740378  | 0.671125  | 11.035930 |
| 6 | 5.812124  | -0.275291 | 9.147559  |
| 6 | -0.459159 | -0.641474 | 7.511874  |
| 1 | -1.161514 | -1.252670 | 6.927470  |
| 1 | -0.620571 | 0.402283  | 7.217766  |
| 6 | -0.823424 | -0.745866 | 9.002252  |
| 6 | 4.068879  | -0.438224 | 12.520335 |
| 1 | 4.950790  | -0.650988 | 13.140638 |
| 1 | 3.249182  | -1.046965 | 12.917716 |
| 6 | 3.662577  | 1.008313  | 12.686191 |
| 6 | 4.137320  | 1.783339  | 13.748942 |
| 1 | 4.881396  | 1.376336  | 14.425348 |
| 6 | 3.635089  | 3.071621  | 13.922225 |
| 1 | 3.988854  | 3.692329  | 14.739648 |
| 6 | 2.672096  | 3.551006  | 13.035954 |
| 1 | 2.247150  | 4.542093  | 13.136158 |
| 6 | 2.256722  | 2.723783  | 11.993175 |
| 6 | 1.199673  | 3.180279  | 10.996764 |
| 6 | 1.316644  | -0.583144 | 5.858819  |
| 1 | 0.577279  | -0.931425 | 5.123214  |
| 1 | 2.265894  | -1.069459 | 5.607121  |
| 6 | 1.521021  | 0.907300  | 5.710729  |
| 6 | 1.138539  | 1.578450  | 4.544856  |
| 1 | 0.620649  | 1.041203  | 3.757511  |
| 6 | 1.436184  | 2.933018  | 4.417046  |
| 1 | 1.148166  | 3.475480  | 3.521838  |
| 6 | 2.110474  | 3.580990  | 5.450797  |
| 1 | 2.370566  | 4.630640  | 5.392944  |
| 6 | 2.452499  | 2.848625  | 6.586520  |
| 6 | 3.212910  | 3.491558  | 7.738848  |

Output energies:

|                                              |                             |
|----------------------------------------------|-----------------------------|
| Zero-point correction=                       | 0.436474 (Hartree/Particle) |
| Thermal correction to Energy=                | 0.468022                    |
| Thermal correction to Enthalpy=              | 0.468966                    |
| Thermal correction to Gibbs Free Energy=     | 0.370480                    |
| Sum of electronic and zero-point Energies=   | -1779.359452                |
| Sum of electronic and thermal Energies=      | -1779.327904                |
| Sum of electronic and thermal Enthalpies=    | -1779.326960                |
| Sum of electronic and thermal Free Energies= | -1779.425446                |

(27) La-Oxyaapa,  $N1^S N2^S(\delta\lambda)$ , enantiomer of  $N1^R N2^R(\lambda\delta)$

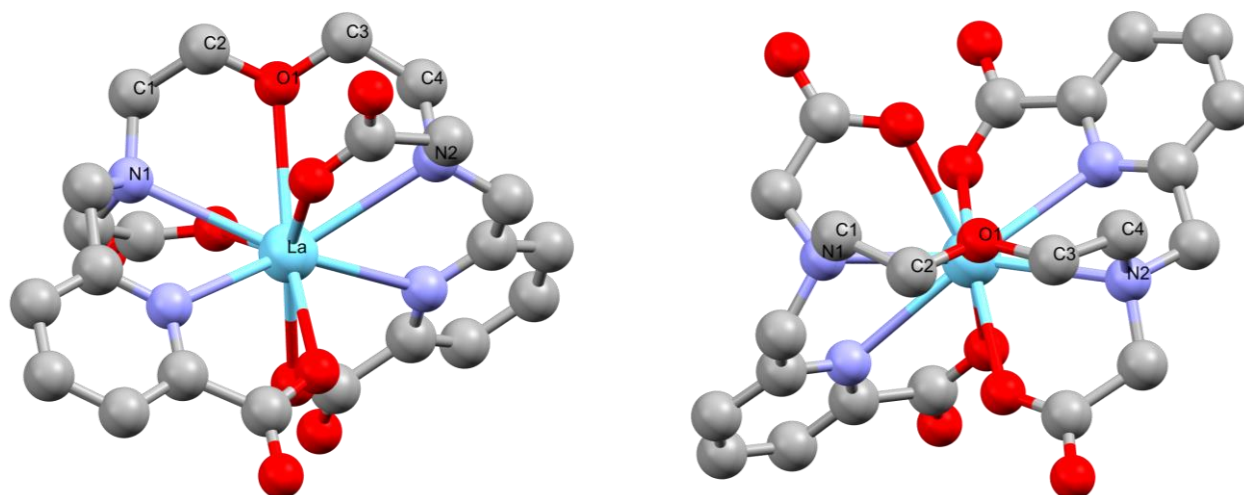

**Figure S122.** Side view (left) and top view (right) of optimized La-Oxyaapa complex in  $N1^S N2^S(\delta\lambda)$  conformation. Hydrogen atoms are omitted for clarity.

Optimized Cartesian coordinates in Å:

| Atomic # | x         | y         | z         |
|----------|-----------|-----------|-----------|
| 57       | 2.599025  | 0.823649  | 9.094671  |
| 8        | 3.092633  | -1.951510 | 8.718078  |
| 8        | 5.075759  | 0.576357  | 8.365841  |
| 8        | 0.775226  | -0.561221 | 10.247395 |
| 8        | 1.068451  | 2.665300  | 10.015248 |
| 8        | 3.514772  | 3.125380  | 8.222628  |
| 8        | 7.210697  | 1.012577  | 8.929809  |
| 8        | -0.865001 | -2.092303 | 10.363531 |
| 8        | 0.487605  | 4.252474  | 11.501842 |
| 8        | 4.670326  | 4.122222  | 6.564265  |
| 7        | 4.519445  | -0.485888 | 10.833483 |
| 7        | 0.700382  | -0.662341 | 7.419685  |
| 7        | 2.681345  | 1.463353  | 11.811901 |
| 7        | 2.105871  | 1.653428  | 6.462733  |
| 6        | 4.812319  | -1.871397 | 10.383025 |
| 1        | 5.283007  | -2.450586 | 11.191050 |
| 1        | 5.534784  | -1.822885 | 9.565010  |
| 6        | 3.593026  | -2.621770 | 9.883686  |
| 1        | 3.890460  | -3.645347 | 9.620908  |
| 1        | 2.800041  | -2.681051 | 10.640628 |
| 6        | 2.080410  | -2.697674 | 8.034744  |
| 1        | 1.327133  | -3.053328 | 8.748026  |
| 1        | 2.532962  | -3.583591 | 7.569383  |
| 6        | 1.466974  | -1.842930 | 6.941183  |

|   |           |           |           |
|---|-----------|-----------|-----------|
| 1 | 2.267019  | -1.484028 | 6.285472  |
| 1 | 0.815296  | -2.493957 | 6.336655  |
| 6 | 5.721353  | 0.352414  | 10.675138 |
| 1 | 6.603245  | -0.101271 | 11.149683 |
| 1 | 5.549216  | 1.313969  | 11.172938 |
| 6 | 6.044858  | 0.662648  | 9.205299  |
| 6 | -0.455855 | -1.078783 | 8.240463  |
| 1 | -0.933732 | -1.983430 | 7.841776  |
| 1 | -1.204594 | -0.279723 | 8.210364  |
| 6 | -0.150917 | -1.285539 | 9.732349  |
| 6 | 4.073449  | -0.496780 | 12.239875 |
| 1 | 4.899284  | -0.763663 | 12.915790 |
| 1 | 3.313849  | -1.279849 | 12.346978 |
| 6 | 3.450202  | 0.804413  | 12.693489 |
| 6 | 3.605869  | 1.255490  | 14.008778 |
| 1 | 4.244326  | 0.709205  | 14.694998 |
| 6 | 2.929296  | 2.403049  | 14.413770 |
| 1 | 3.034769  | 2.772211  | 15.429226 |
| 6 | 2.112795  | 3.068405  | 13.500016 |
| 1 | 1.558773  | 3.958024  | 13.772840 |
| 6 | 2.016215  | 2.566176  | 12.203300 |
| 6 | 1.117852  | 3.229162  | 11.167797 |
| 6 | 0.242886  | 0.106416  | 6.240543  |
| 1 | -0.553128 | 0.782862  | 6.569931  |
| 1 | -0.195432 | -0.552247 | 5.477110  |
| 6 | 1.317013  | 0.968821  | 5.618309  |
| 6 | 1.410029  | 1.133053  | 4.232914  |
| 1 | 0.764160  | 0.560166  | 3.575995  |
| 6 | 2.333527  | 2.042750  | 3.721726  |
| 1 | 2.424638  | 2.187952  | 2.649690  |
| 6 | 3.131898  | 2.768833  | 4.603953  |
| 1 | 3.854027  | 3.496285  | 4.254294  |
| 6 | 2.987477  | 2.544423  | 5.972657  |
| 6 | 3.802404  | 3.331691  | 6.990896  |

Output energies:

|                                              |                             |
|----------------------------------------------|-----------------------------|
| Zero-point correction=                       | 0.437640 (Hartree/Particle) |
| Thermal correction to Energy=                | 0.469289                    |
| Thermal correction to Enthalpy=              | 0.470233                    |
| Thermal correction to Gibbs Free Energy=     | 0.374784                    |
| Sum of electronic and zero-point Energies=   | -1779.358868                |
| Sum of electronic and thermal Energies=      | -1779.327219                |
| Sum of electronic and thermal Enthalpies=    | -1779.326275                |
| Sum of electronic and thermal Free Energies= | -1779.421723                |

(28) La-Oxyaapa,  $N1^S N2^S(\lambda\lambda)$ , enantiomer of  $N1^R N2^R(\delta\delta)$

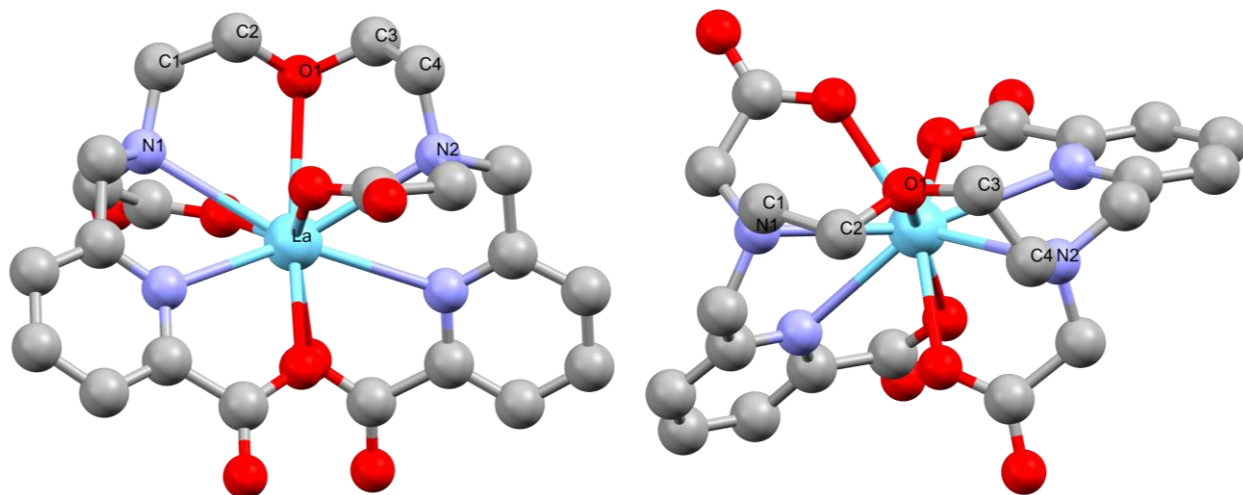

**Figure S123.** Side view (left) and top view (right) of optimized La-Oxyaapa complex in  $N1^S N2^S(\lambda\lambda)$  conformation. Hydrogen atoms are omitted for clarity.

Optimized Cartesian coordinates in Å:

| Atomic # | x         | y         | z         |
|----------|-----------|-----------|-----------|
| 57       | 2.973271  | 0.660511  | 8.953254  |
| 8        | 3.407037  | -2.123476 | 8.551524  |
| 8        | 5.509406  | 0.286933  | 8.709580  |
| 8        | 0.837421  | -0.324047 | 10.045655 |
| 8        | 1.649014  | 2.748361  | 9.662628  |
| 8        | 4.057078  | 2.720574  | 7.870667  |
| 8        | 7.607882  | 0.232065  | 9.515263  |
| 8        | -1.408571 | -0.186263 | 10.034771 |
| 8        | 1.429603  | 4.582801  | 10.949490 |
| 8        | 3.943921  | 4.600555  | 6.638029  |
| 7        | 4.502267  | -0.855883 | 11.006607 |
| 7        | 0.959577  | -0.845222 | 7.357669  |
| 7        | 2.895208  | 1.415421  | 11.646704 |
| 7        | 2.219974  | 1.499010  | 6.321726  |
| 6        | 4.631895  | -2.278175 | 10.602244 |
| 1        | 4.791706  | -2.919048 | 11.481838 |
| 1        | 5.519814  | -2.377554 | 9.972289  |
| 6        | 3.445338  | -2.807740 | 9.816386  |
| 1        | 3.587406  | -3.881843 | 9.643422  |
| 1        | 2.500457  | -2.667142 | 10.355978 |
| 6        | 2.583596  | -2.740982 | 7.547875  |
| 1        | 2.636220  | -3.831667 | 7.647821  |
| 1        | 3.035613  | -2.473060 | 6.588564  |
| 6        | 1.130401  | -2.294841 | 7.618743  |

|   |           |           |           |
|---|-----------|-----------|-----------|
| 1 | 0.539764  | -2.893721 | 6.907108  |
| 1 | 0.742554  | -2.512555 | 8.615982  |
| 6 | 5.826821  | -0.215922 | 11.043084 |
| 1 | 6.564343  | -0.825854 | 11.583644 |
| 1 | 5.746425  | 0.735761  | 11.580418 |
| 6 | 6.372259  | 0.112350  | 9.645489  |
| 6 | -0.311876 | -0.368936 | 7.926947  |
| 1 | -1.162542 | -0.988101 | 7.605114  |
| 1 | -0.501942 | 0.645922  | 7.558267  |
| 6 | -0.305019 | -0.296429 | 9.461183  |
| 6 | 3.824320  | -0.748069 | 12.309081 |
| 1 | 4.453903  | -1.137014 | 13.123805 |
| 1 | 2.928020  | -1.378989 | 12.277150 |
| 6 | 3.382343  | 0.659868  | 12.645220 |
| 6 | 3.407819  | 1.120762  | 13.966260 |
| 1 | 3.815463  | 0.490353  | 14.749402 |
| 6 | 2.901925  | 2.386121  | 14.252075 |
| 1 | 2.911953  | 2.764232  | 15.269631 |
| 6 | 2.378745  | 3.156578  | 13.214996 |
| 1 | 1.963975  | 4.141801  | 13.388985 |
| 6 | 2.389020  | 2.631474  | 11.923565 |
| 6 | 1.777787  | 3.399614  | 10.761041 |
| 6 | 1.006687  | -0.576638 | 5.908315  |
| 1 | 0.075420  | -0.889056 | 5.412995  |
| 1 | 1.808594  | -1.182295 | 5.473164  |
| 6 | 1.302865  | 0.867013  | 5.571055  |
| 6 | 0.696178  | 1.488388  | 4.474149  |
| 1 | -0.047788 | 0.953146  | 3.893666  |
| 6 | 1.060846  | 2.791804  | 4.147089  |
| 1 | 0.603132  | 3.295011  | 3.301017  |
| 6 | 2.016633  | 3.442048  | 4.925470  |
| 1 | 2.332129  | 4.456478  | 4.715386  |
| 6 | 2.568595  | 2.761629  | 6.009966  |
| 6 | 3.604849  | 3.428534  | 6.902131  |

Output energies:

|                                              |                             |
|----------------------------------------------|-----------------------------|
| Zero-point correction=                       | 0.435613 (Hartree/Particle) |
| Thermal correction to Energy=                | 0.465714                    |
| Thermal correction to Enthalpy=              | 0.466659                    |
| Thermal correction to Gibbs Free Energy=     | 0.373885                    |
| Sum of electronic and zero-point Energies=   | -1779.359470                |
| Sum of electronic and thermal Energies=      | -1779.329369                |
| Sum of electronic and thermal Enthalpies=    | -1779.328425                |
| Sum of electronic and thermal Free Energies= | -1779.421199                |

(29) La-Oxyaapa,  $N1^S N2^R(\delta\delta)$ , enantiomer of  $N1^R N2^S(\lambda\lambda)$

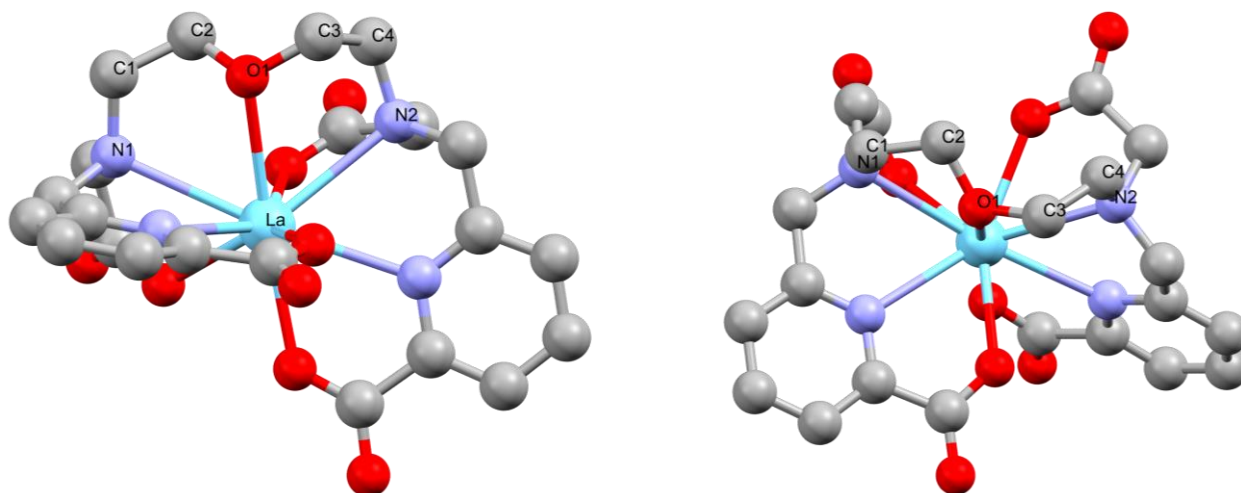

**Figure S124.** Side view (left) and top view (right) of optimized La-Oxyaapa complex in  $N1^S N2^R(\delta\delta)$  conformation. Hydrogen atoms are omitted for clarity.

Optimized Cartesian coordinates in Å:

| Atomic # | x         | y         | z         |
|----------|-----------|-----------|-----------|
| 6        | 3.248596  | 1.767711  | -0.432011 |
| 6        | 3.796115  | 0.404270  | -0.063649 |
| 6        | 5.172763  | 0.188833  | 0.066635  |
| 6        | 5.625088  | -1.065327 | 0.468561  |
| 6        | 4.695756  | -2.071056 | 0.731407  |
| 6        | 3.341276  | -1.782403 | 0.573671  |
| 6        | 2.275453  | -2.824945 | 0.875807  |
| 8        | 2.644377  | -3.957230 | 1.245662  |
| 6        | 1.365072  | 3.019642  | -1.345093 |
| 8        | -0.628987 | 2.469370  | -0.005100 |
| 6        | -1.743112 | 2.685951  | -0.894665 |
| 6        | -2.940424 | 1.945546  | -0.321696 |
| 7        | -2.724665 | 0.481867  | -0.229462 |
| 6        | -3.510984 | -0.098081 | 0.875233  |
| 6        | -2.925284 | 0.194382  | 2.237044  |
| 6        | -3.747561 | 0.379510  | 3.354138  |
| 6        | -3.159818 | 0.576998  | 4.600547  |
| 6        | -1.769092 | 0.606991  | 4.696492  |
| 6        | -1.017391 | 0.438405  | 3.534414  |
| 6        | 0.500352  | 0.520730  | 3.562098  |
| 8        | 1.069861  | 0.587791  | 4.670539  |
| 6        | -3.059634 | -0.205202 | -1.485760 |
| 8        | 1.086362  | 0.527752  | 2.420503  |
| 7        | -1.586773 | 0.221692  | 2.334776  |

|    |           |           |           |
|----|-----------|-----------|-----------|
| 8  | 1.054249  | -2.451142 | 0.730574  |
| 7  | 2.908066  | -0.572591 | 0.176092  |
| 1  | -4.558595 | 0.235702  | 0.841828  |
| 1  | -3.524270 | -1.185505 | 0.744063  |
| 1  | -3.124428 | 2.329880  | 0.685378  |
| 1  | -3.830597 | 2.181473  | -0.923786 |
| 1  | -1.967674 | 3.758334  | -0.940309 |
| 1  | -1.493234 | 2.340000  | -1.904492 |
| 1  | -1.266168 | 0.769616  | 5.641766  |
| 1  | -3.776717 | 0.717989  | 5.482646  |
| 1  | -4.826181 | 0.367996  | 3.237188  |
| 1  | 4.998467  | -3.060193 | 1.052549  |
| 1  | 6.688331  | -1.257136 | 0.575016  |
| 1  | 5.868633  | 0.993294  | -0.146904 |
| 57 | 0.137765  | -0.157272 | 0.107140  |
| 7  | 2.006231  | 1.687138  | -1.222112 |
| 1  | 4.024620  | 2.342866  | -0.959375 |
| 1  | 3.032005  | 2.310564  | 0.495520  |
| 6  | 2.279154  | 1.148506  | -2.567247 |
| 6  | 0.478537  | 3.375649  | -0.161612 |
| 1  | 0.100533  | 4.398268  | -0.280283 |
| 1  | 1.029666  | 3.324232  | 0.781418  |
| 1  | 0.756572  | 3.021140  | -2.253838 |
| 1  | 2.121384  | 3.809581  | -1.473378 |
| 6  | -2.476561 | -1.625805 | -1.572793 |
| 1  | -2.637029 | 0.360238  | -2.322205 |
| 1  | -4.146237 | -0.256650 | -1.651296 |
| 8  | -1.512524 | -1.922385 | -0.774254 |
| 8  | -2.954421 | -2.389257 | -2.436539 |
| 6  | 1.025715  | 0.571252  | -3.236498 |
| 1  | 2.993008  | 0.322454  | -2.483926 |
| 1  | 2.734114  | 1.902913  | -3.223187 |
| 8  | 0.921279  | 0.658628  | -4.477022 |
| 8  | 0.183828  | -0.018031 | -2.464573 |

Output energies:

|                                              |                             |
|----------------------------------------------|-----------------------------|
| Zero-point correction=                       | 0.437072 (Hartree/Particle) |
| Thermal correction to Energy=                | 0.468331                    |
| Thermal correction to Enthalpy=              | 0.469275                    |
| Thermal correction to Gibbs Free Energy=     | 0.373373                    |
| Sum of electronic and zero-point Energies=   | -1779.360266                |
| Sum of electronic and thermal Energies=      | -1779.329007                |
| Sum of electronic and thermal Enthalpies=    | -1779.328063                |
| Sum of electronic and thermal Free Energies= | -1779.423965                |



(30) La-Oxyaapa,  $N1^S N2^R(\delta\lambda)$ , enantiomer of  $N1^R N2^S(\lambda\delta)$

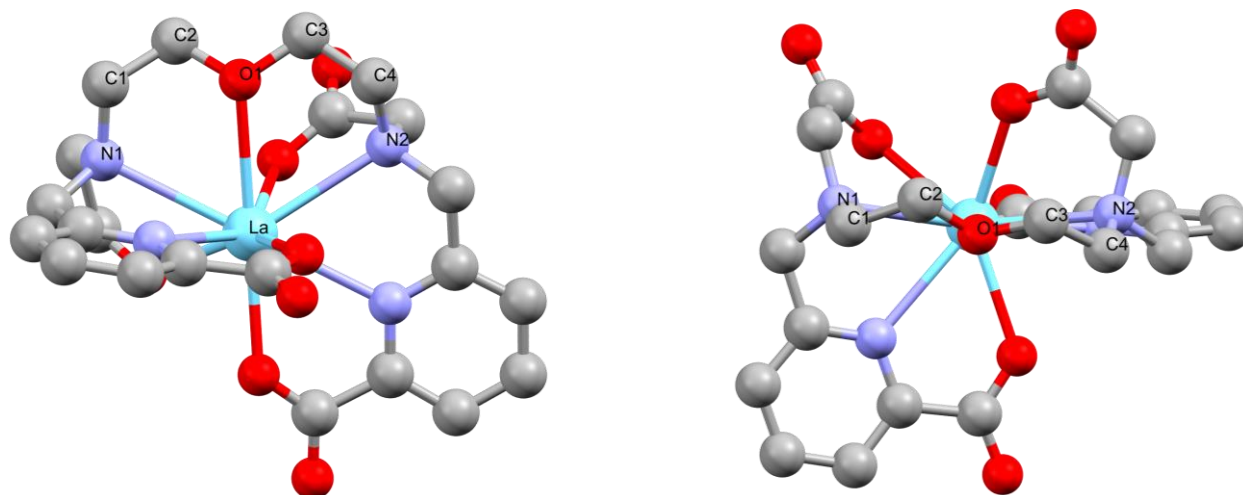

**Figure S125.** Side view (left) and top view (right) of optimized La-Oxyaapa complex in  $N1^S N2^R(\delta\lambda)$  conformation. Hydrogen atoms are omitted for clarity.

Optimized Cartesian coordinates in Å:

| Atomic # | x         | y         | z         |
|----------|-----------|-----------|-----------|
| 6        | 3.408314  | 1.650516  | -0.122306 |
| 6        | 3.843797  | 0.209207  | 0.024938  |
| 6        | 5.193898  | -0.154206 | -0.021625 |
| 6        | 5.545206  | -1.480336 | 0.222249  |
| 6        | 4.544076  | -2.405795 | 0.513272  |
| 6        | 3.220285  | -1.968174 | 0.536309  |
| 6        | 2.082554  | -2.911768 | 0.893327  |
| 8        | 2.348302  | -4.115609 | 1.084030  |
| 6        | 1.584397  | 3.149547  | -0.617174 |
| 8        | -0.753923 | 2.517760  | -0.589299 |
| 6        | -2.030760 | 2.602858  | -1.241824 |
| 6        | -3.067129 | 1.841616  | -0.438065 |
| 7        | -2.767345 | 0.400494  | -0.298957 |
| 6        | -3.499719 | -0.168989 | 0.847073  |
| 6        | -2.946418 | 0.280305  | 2.180399  |
| 6        | -3.783755 | 0.475867  | 3.284280  |
| 6        | -3.220331 | 0.844772  | 4.502813  |
| 6        | -1.840442 | 1.029174  | 4.584328  |
| 6        | -1.074137 | 0.830621  | 3.437300  |
| 6        | 0.428368  | 1.059686  | 3.441164  |
| 8        | 0.986856  | 1.326700  | 4.524351  |
| 6        | -3.095658 | -0.348746 | -1.520074 |
| 8        | 1.013832  | 0.968036  | 2.302835  |
| 7        | -1.617713 | 0.450423  | 2.266467  |

|    |           |           |           |
|----|-----------|-----------|-----------|
| 8  | 0.916975  | -2.380848 | 0.987632  |
| 7  | 2.882947  | -0.692176 | 0.282544  |
| 1  | -4.573596 | 0.066289  | 0.795204  |
| 1  | -3.412767 | -1.259820 | 0.792990  |
| 1  | -3.113501 | 2.279553  | 0.562729  |
| 1  | -4.053144 | 2.001312  | -0.902438 |
| 1  | -2.340107 | 3.654645  | -1.300268 |
| 1  | -1.937704 | 2.224329  | -2.267990 |
| 1  | -1.358464 | 1.329675  | 5.506461  |
| 1  | -3.849390 | 0.999913  | 5.373853  |
| 1  | -4.855324 | 0.342803  | 3.178643  |
| 1  | 4.768341  | -3.444637 | 0.722316  |
| 1  | 6.586072  | -1.786956 | 0.190057  |
| 1  | 5.948060  | 0.593903  | -0.241683 |
| 57 | 0.128858  | -0.087833 | 0.129242  |
| 7  | 2.135896  | 1.795843  | -0.858022 |
| 1  | 4.213442  | 2.236015  | -0.589406 |
| 1  | 3.263753  | 2.058089  | 0.884440  |
| 6  | 2.348752  | 1.542025  | -2.298650 |
| 6  | 0.210244  | 3.378673  | -1.215105 |
| 1  | 0.204950  | 3.211424  | -2.299472 |
| 1  | -0.073512 | 4.425272  | -1.042665 |
| 1  | 2.255811  | 3.921870  | -1.026335 |
| 1  | 1.528754  | 3.301399  | 0.465167  |
| 6  | -2.424648 | -1.729014 | -1.590908 |
| 1  | -2.738945 | 0.211692  | -2.389868 |
| 1  | -4.181408 | -0.474321 | -1.647311 |
| 8  | -1.416397 | -1.936623 | -0.822728 |
| 8  | -2.881794 | -2.546421 | -2.416608 |
| 6  | 1.154072  | 0.923976  | -3.039642 |
| 1  | 3.160461  | 0.813722  | -2.405252 |
| 1  | 2.669098  | 2.452461  | -2.821778 |
| 8  | 1.019915  | 1.183073  | -4.252117 |
| 8  | 0.404251  | 0.117153  | -2.373255 |

Output energies:

|                                              |                             |
|----------------------------------------------|-----------------------------|
| Zero-point correction=                       | 0.436360 (Hartree/Particle) |
| Thermal correction to Energy=                | 0.467973                    |
| Thermal correction to Enthalpy=              | 0.468917                    |
| Thermal correction to Gibbs Free Energy=     | 0.371572                    |
| Sum of electronic and zero-point Energies=   | -1779.364485                |
| Sum of electronic and thermal Energies=      | -1779.332872                |
| Sum of electronic and thermal Enthalpies=    | -1779.331927                |
| Sum of electronic and thermal Free Energies= | -1779.429272                |

(31) La-Oxyaapa,  $N1^S N2^R(\lambda\delta)$ , enantiomer of  $N1^R N2^S(\delta\lambda)$

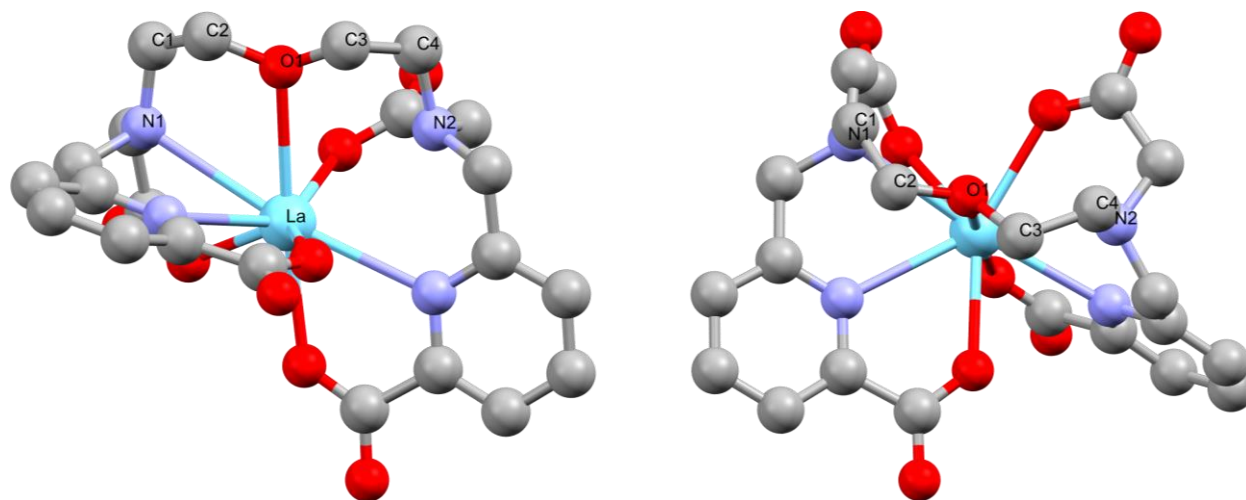

**Figure S126.** Side view (left) and top view (right) of optimized La-Oxyaapa complex in  $N1^S N2^R(\lambda\delta)$  conformation. Hydrogen atoms are omitted for clarity.

Optimized Cartesian coordinates in Å:

| Atomic # | x         | y         | z         |
|----------|-----------|-----------|-----------|
| 6        | 3.274937  | 1.745524  | -0.292643 |
| 6        | 3.819424  | 0.371887  | 0.037677  |
| 6        | 5.191206  | 0.175255  | 0.235551  |
| 6        | 5.647958  | -1.087360 | 0.603735  |
| 6        | 4.726662  | -2.120920 | 0.766216  |
| 6        | 3.376807  | -1.849096 | 0.547932  |
| 6        | 2.321437  | -2.926122 | 0.747499  |
| 8        | 2.698271  | -4.070639 | 1.068472  |
| 6        | 1.467221  | 3.053117  | -1.255352 |
| 8        | -0.666073 | 2.342726  | -0.488495 |
| 6        | -1.985408 | 2.718528  | -0.074044 |
| 6        | -2.968412 | 1.798592  | -0.787910 |
| 7        | -2.755693 | 0.354646  | -0.522562 |
| 6        | -3.537309 | -0.117648 | 0.635402  |
| 6        | -2.982463 | 0.308111  | 1.973955  |
| 6        | -3.835593 | 0.645567  | 3.030325  |
| 6        | -3.285448 | 0.970554  | 4.267192  |
| 6        | -1.899012 | 0.970527  | 4.409988  |
| 6        | -1.114753 | 0.639136  | 3.306050  |
| 6        | 0.401867  | 0.673493  | 3.389136  |
| 8        | 0.930970  | 0.908237  | 4.494939  |
| 6        | -3.078610 | -0.471976 | -1.696052 |
| 8        | 1.032218  | 0.465279  | 2.292206  |
| 7        | -1.647450 | 0.297407  | 2.118099  |

|    |           |           |           |
|----|-----------|-----------|-----------|
| 8  | 1.098741  | -2.567656 | 0.577846  |
| 7  | 2.939432  | -0.631021 | 0.181679  |
| 1  | -4.588307 | 0.198729  | 0.558104  |
| 1  | -3.536150 | -1.212903 | 0.617944  |
| 1  | -3.992250 | 2.106463  | -0.527799 |
| 1  | -2.846236 | 1.966210  | -1.861235 |
| 1  | -2.071174 | 2.671633  | 1.016932  |
| 1  | -2.187532 | 3.750937  | -0.387255 |
| 1  | -1.420277 | 1.229170  | 5.346459  |
| 1  | -3.926824 | 1.231554  | 5.103311  |
| 1  | -4.909075 | 0.653431  | 2.873784  |
| 1  | 5.030943  | -3.119113 | 1.056466  |
| 1  | 6.707655  | -1.263810 | 0.760421  |
| 1  | 5.880516  | 1.001900  | 0.099040  |
| 57 | 0.140911  | -0.290930 | -0.019669 |
| 7  | 2.089225  | 1.708209  | -1.164781 |
| 1  | 4.079086  | 2.356734  | -0.730906 |
| 1  | 2.985230  | 2.232857  | 0.646221  |
| 6  | 2.425991  | 1.209040  | -2.508824 |
| 6  | 0.378086  | 3.291134  | -0.223344 |
| 1  | -0.008407 | 4.310963  | -0.337696 |
| 1  | 0.742691  | 3.171479  | 0.805735  |
| 1  | 1.007819  | 3.152080  | -2.243244 |
| 1  | 2.226753  | 3.844543  | -1.174368 |
| 6  | -2.475976 | -1.885328 | -1.639097 |
| 1  | -2.654712 | 0.005975  | -2.584935 |
| 1  | -4.162233 | -0.562164 | -1.864242 |
| 8  | -1.494319 | -2.083411 | -0.831582 |
| 8  | -2.952353 | -2.740766 | -2.412525 |
| 6  | 1.221327  | 0.608861  | -3.249995 |
| 1  | 3.158562  | 0.400294  | -2.414570 |
| 1  | 2.884771  | 1.987442  | -3.132997 |
| 8  | 1.158813  | 0.749219  | -4.487460 |
| 8  | 0.375939  | -0.058059 | -2.542484 |

Output energies:

|                                              |                             |
|----------------------------------------------|-----------------------------|
| Zero-point correction=                       | 0.436425 (Hartree/Particle) |
| Thermal correction to Energy=                | 0.468902                    |
| Thermal correction to Enthalpy=              | 0.469846                    |
| Thermal correction to Gibbs Free Energy=     | 0.369623                    |
| Sum of electronic and zero-point Energies=   | -1779.357695                |
| Sum of electronic and thermal Energies=      | -1779.325218                |
| Sum of electronic and thermal Enthalpies=    | -1779.324274                |
| Sum of electronic and thermal Free Energies= | -1779.424496                |

(32) La-Oxyaapa,  $N1^S N2^R(\lambda\lambda)$ , enantiomer of  $N1^R N2^S(\delta\delta)$

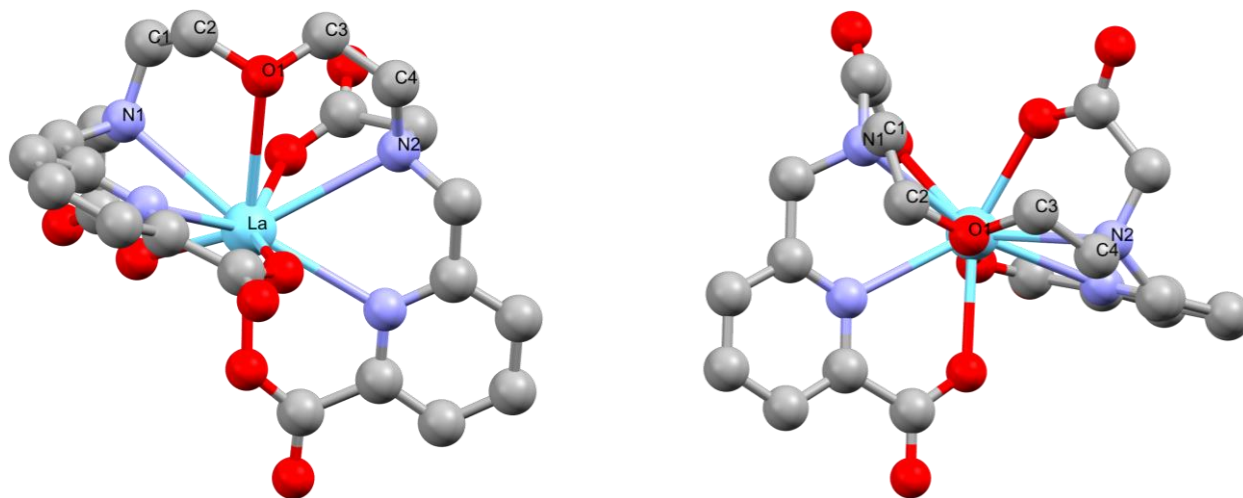

**Figure S127.** Side view (left) and top view (right) of optimized La-Oxyaapa complex in  $N1^S N2^R(\lambda\lambda)$  conformation. Hydrogen atoms are omitted for clarity.

Optimized Cartesian coordinates in Å:

| Atomic # | x         | y         | z         |
|----------|-----------|-----------|-----------|
| 6        | 3.410950  | 1.662099  | -0.191638 |
| 6        | 3.912538  | 0.240325  | -0.075844 |
| 6        | 5.270228  | -0.058089 | -0.233446 |
| 6        | 5.704353  | -1.365970 | -0.032208 |
| 6        | 4.773089  | -2.339721 | 0.323098  |
| 6        | 3.435904  | -1.967047 | 0.456516  |
| 6        | 2.382813  | -2.983371 | 0.871070  |
| 8        | 2.741703  | -4.160998 | 1.071404  |
| 6        | 1.546122  | 3.120110  | -0.645629 |
| 8        | -0.692074 | 2.538988  | 0.003221  |
| 6        | -2.113018 | 2.712060  | -0.125583 |
| 6        | -2.746909 | 1.653332  | -1.016171 |
| 7        | -2.601052 | 0.268309  | -0.513952 |
| 6        | -3.500817 | -0.020361 | 0.621938  |
| 6        | -3.009596 | 0.430014  | 1.980327  |
| 6        | -3.926585 | 0.813153  | 2.967315  |
| 6        | -3.457771 | 1.154388  | 4.231831  |
| 6        | -2.084911 | 1.125003  | 4.474467  |
| 6        | -1.232486 | 0.746989  | 3.439241  |
| 6        | 0.275438  | 0.746290  | 3.640332  |
| 8        | 0.719419  | 0.999028  | 4.778436  |
| 6        | -2.879331 | -0.692723 | -1.595492 |
| 8        | 0.988493  | 0.493285  | 2.603198  |
| 7        | -1.690339 | 0.388751  | 2.223369  |

|    |           |           |           |
|----|-----------|-----------|-----------|
| 8  | 1.184175  | -2.540486 | 0.998073  |
| 7  | 3.015632  | -0.704894 | 0.251880  |
| 1  | -4.502655 | 0.397933  | 0.442675  |
| 1  | -3.626553 | -1.107334 | 0.678449  |
| 1  | -3.809390 | 1.910615  | -1.160890 |
| 1  | -2.266494 | 1.699083  | -1.997400 |
| 1  | -2.524218 | 2.691817  | 0.885564  |
| 1  | -2.327546 | 3.701338  | -0.547258 |
| 1  | -1.668384 | 1.395195  | 5.436867  |
| 1  | -4.150291 | 1.450408  | 5.013668  |
| 1  | -4.985946 | 0.842699  | 2.735274  |
| 1  | 5.059951  | -3.369566 | 0.496475  |
| 1  | 6.752722  | -1.621447 | -0.151197 |
| 1  | 5.966028  | 0.727571  | -0.508083 |
| 57 | 0.206988  | -0.302413 | 0.268913  |
| 7  | 2.100453  | 1.764237  | -0.863365 |
| 1  | 4.173055  | 2.279109  | -0.690738 |
| 1  | 3.299466  | 2.058261  | 0.824423  |
| 6  | 2.236571  | 1.469417  | -2.304061 |
| 6  | 0.071651  | 3.265105  | -0.970107 |
| 1  | -0.165354 | 2.924129  | -1.985395 |
| 1  | -0.188571 | 4.330214  | -0.910341 |
| 1  | 2.101510  | 3.864855  | -1.238157 |
| 1  | 1.680797  | 3.376696  | 0.409457  |
| 6  | -2.305824 | -2.091656 | -1.333579 |
| 1  | -2.403309 | -0.333602 | -2.512814 |
| 1  | -3.954613 | -0.783205 | -1.807584 |
| 8  | -1.363348 | -2.191721 | -0.464953 |
| 8  | -2.757845 | -3.035865 | -2.013182 |
| 6  | 1.012822  | 0.810382  | -2.952883 |
| 1  | 3.052697  | 0.750488  | -2.438463 |
| 1  | 2.508247  | 2.368486  | -2.873046 |
| 8  | 0.774941  | 1.061969  | -4.151075 |
| 8  | 0.348707  | -0.023178 | -2.231698 |

Output energies:

|                                              |                             |
|----------------------------------------------|-----------------------------|
| Zero-point correction=                       | 0.437543 (Hartree/Particle) |
| Thermal correction to Energy=                | 0.470301                    |
| Thermal correction to Enthalpy=              | 0.471245                    |
| Thermal correction to Gibbs Free Energy=     | 0.371178                    |
| Sum of electronic and zero-point Energies=   | -1779.359856                |
| Sum of electronic and thermal Energies=      | -1779.327098                |
| Sum of electronic and thermal Enthalpies=    | -1779.326154                |
| Sum of electronic and thermal Free Energies= | -1779.426220                |

## 11. <sup>17</sup>O NMR Measurements

### (1) Theoretical background

In this study, Swift-Connick theory<sup>1</sup> was employed to deal with the  $1/T_2$  data:

$$\frac{1}{P_m} \left( \frac{1}{T_2} - \frac{1}{T_{2A}} \right) = \frac{1}{T_{2r}} = \frac{1}{\tau_m} \cdot \frac{\frac{1}{T_{2m}} \left( \frac{1}{\tau_m} + \frac{1}{T_{2m}} \right) + (\Delta\omega_m)^2}{\left( \frac{1}{\tau_m} + \frac{1}{T_{2m}} \right)^2 + (\Delta\omega_m)^2} + \frac{1}{T_{2os}}. \quad (S1)$$

In this equation,  $1/T_2$  and  $1/T_{2A}$  are the transverse relaxation rates of the sample solution (Gd-OxyMepa) and reference solution (acidified water),  $P_m$  is the mole fraction of bound water,  $1/T_{2r}$  is the reduced transverse relaxation rate,  $1/T_{2m}$  is the relaxation rate of the bound water,  $\tau_m$  is the mean lifetime (reciprocal of the exchange rate  $k_{ex}$ ) of the bound water, and  $\Delta\omega_m$  is the chemical shift difference between bound water and bulk water. Since the outer-sphere contribution  $1/T_{2os}$  is negligible,<sup>2,3</sup> the above equation can be simplified to

$$\frac{1}{P_m} \left( \frac{1}{T_2} - \frac{1}{T_{2A}} \right) = \frac{1}{T_{2r}} = \frac{1}{\tau_m} \cdot \frac{\frac{1}{T_{2m}} \left( \frac{1}{\tau_m} + \frac{1}{T_{2m}} \right) + (\Delta\omega_m)^2}{\left( \frac{1}{\tau_m} + \frac{1}{T_{2m}} \right)^2 + (\Delta\omega_m)^2}. \quad (S2)$$

$\Delta\omega_m$  is determined by the hyperfine interaction between the  $Gd^{3+}$  electron spin and the <sup>17</sup>O nucleus. It has the expression as below:<sup>2-4</sup>

$$\Delta\omega_m = \frac{g_L \mu_B S(S+1) B A}{3k_B T \hbar}, \quad (S3)$$

where  $g_L$  is the isotropic Landé  $g$ -factor ( $g_L = 2.0$  for  $Gd^{3+}$ ),  $\mu_B$  is the Bohr magneton ( $\mu_B = 9.274 \times 10^{-24} \text{ J}\cdot\text{T}^{-1}$ ),  $S$  is the electron spin ( $S = 7/2$  for  $Gd^{3+}$ ),  $B$  is the applied magnetic field ( $B = 14.1 \text{ T}$  in this work),  $k_B$  is the Boltzmann constant ( $k_B = 1.381 \times 10^{-23} \text{ J}\cdot\text{K}^{-1}$ ),  $T$  is the temperature in K, and  $A/\hbar$  is the hyperfine coupling constant.

The exchange rate  $k_{ex}$  obeys the Eyring Equation:

$$\frac{1}{\tau_m} = k_{ex} = \frac{k_B T}{h} \exp \left( \frac{\Delta S^\ddagger}{R} - \frac{\Delta H^\ddagger}{RT} \right), \quad (S4)$$

where  $\Delta H^\ddagger$  and  $\Delta S^\ddagger$  are the enthalpy and entropy of activation for the water exchange process,  $h$  is the Planck constant ( $h = 6.626 \times 10^{-34}$  J·s),  $R$  is the ideal gas constant ( $R = 8.314$  J·K<sup>-1</sup>·mol<sup>-1</sup>). This equation can be used to derive the exchange rate at 298.15 K (25 °C),  $k_{\text{ex}}^{298}$ :

$$\frac{1}{\tau_m} = k_{\text{ex}} = \frac{k_{\text{ex}}^{298} T}{298.15} \exp\left(\frac{\Delta H^\ddagger}{R} \left(\frac{1}{298.15} - \frac{1}{T}\right)\right). \quad (\text{S5})$$

In regard to the transverse relaxation, the scalar contribution  $1/T_{2\text{sc}}$  is the dominant term,<sup>2-5</sup> and thus

$$\frac{1}{T_{2\text{m}}} \approx \frac{1}{T_{2\text{sc}}} = \frac{S(S+1)}{3} \left(\frac{A}{\hbar}\right)^2 \left(\tau_{\text{S}1} + \frac{\tau_{\text{S}2}}{\omega_S^2 \tau_{\text{S}2}^2 + 1}\right), \quad (\text{S6})$$

where  $\omega_S$  is the Larmor frequency of the spin  $S$ . In this expression,  $\frac{1}{\tau_{\text{S}j}}$  is the sum of the exchange rate ( $\frac{1}{\tau_m} = k_{\text{ex}}$ ) and the reciprocal of the longitudinal ( $\frac{1}{T_{1\text{e}}}$ ) or transverse ( $\frac{1}{T_{2\text{e}}}$ ) electron spin relaxation time:

$$\frac{1}{\tau_{\text{S}j}} = \frac{1}{\tau_m} + \frac{1}{T_{j\text{e}}} \quad j = 1, 2. \quad (\text{S7})$$

Since  $\frac{\tau_{\text{S}2}}{\omega_S^2 \tau_{\text{S}2}^2 + 1}$  term is typically small for Gd<sup>3+</sup> complexes,<sup>3</sup> Equation (S6) can therefore be approximated by:

$$\frac{1}{T_{2\text{m}}} \approx \frac{1}{T_{2\text{sc}}} = \frac{S(S+1)}{3} \left(\frac{A}{\hbar}\right)^2 \tau_{\text{S}1} = \frac{S(S+1)}{3} \left(\frac{A}{\hbar}\right)^2 / \left(\frac{1}{\tau_m} + \frac{1}{T_{1\text{e}}}\right), \quad (\text{S8})$$

and  $1/T_{1\text{e}}$  is assumed to have a simple exponential temperature dependence:<sup>5</sup>

$$\frac{1}{T_{1\text{e}}} = \frac{1}{T_{1\text{e}}^{298}} \exp\left(\frac{\Delta E_{\text{T}1\text{e}}}{R} \left(\frac{1}{T} - \frac{1}{298.15}\right)\right), \quad (\text{S9})$$

where  $1/T_{1\text{e}}^{298}$  is the electronic relaxation rate at 298.15 K (25 °C), and  $\Delta E_{\text{T}1\text{e}}$  is the activation energy for electronic relaxation. By globally fitting the experimental data using Equation (S2)–(S9), four parameters ( $k_{\text{ex}}^{298}$ ,  $\Delta H^\ddagger$ ,  $1/T_{1\text{e}}^{298}$ , and  $\Delta E_{\text{T}1\text{e}}$ ) can be obtained.

During the optimization procedure, we employed the following loss function:



$$L\left(k_{\text{ex}}^{298}, \Delta H^\ddagger, \frac{1}{T_{1e}^{298}}, \Delta E_{T_{1e}}\right) = \left( \frac{1}{n} \sum_{i=1}^n \left[ \frac{T_{2r}(T_i | k_{\text{ex}}^{298}, \Delta H^\ddagger, \frac{1}{T_{1e}^{298}}, \Delta E_{T_{1e}}) - T_{2r}^{\text{exp}}(T_i)}{T_{2r}^{\text{exp}}(T_i)} \right]^2 \right)^{\frac{1}{2}}, \quad (\text{S10})$$

where  $T_{2r}(T_i | k_{\text{ex}}^{298}, \Delta H^\ddagger, 1/T_{1e}^{298}, \Delta E_{T_{1e}})$  is the theoretically calculated  $T_{2r}$  from  $k_{\text{ex}}^{298}, \Delta H^\ddagger, 1/T_{1e}^{298}, \Delta E_{T_{1e}}$  based on Equations (S2)–(S9), and  $T_{2r}^{\text{exp}}(T_i)$  is the experimentally measured  $T_{2r}$  value at temperature  $T_i$ . The loss function shown above was minimized during the optimization process by varying the listed four parameters (i.e.  $k_{\text{ex}}^{298}, \Delta H^\ddagger, 1/T_{1e}^{298}, \Delta E_{T_{1e}}$ ).

When considering the “slow-exchange” and “fast-exchange” limits, it is beneficial to further simplify Equation (S2) by assuming a negligible  $\Delta\omega_m$ :

$$\frac{1}{P_m} \left( \frac{1}{T_2} - \frac{1}{T_{2A}} \right) = \frac{1}{T_{2r}} = \frac{1}{\tau_m + T_{2m}}. \quad (\text{S11})$$

At low  $T$ ,  $\tau_m$  is dominant and Equation (S11) becomes

$$\frac{1}{T_{2r}} = \frac{1}{\tau_m} = k_{\text{ex}}. \quad (\text{S12})$$

Following Equation (S4), a plot of  $\ln(1/T_{2r})$  vs  $1000/T$  will therefore have a negative slope at low  $T$ . Whereas at high  $T$ , the  $T_{2m}$  term dominates and Equation (S11) becomes

$$\frac{1}{T_{2r}} = \frac{1}{T_{2m}} = \frac{S(S+1)}{3} \left( \frac{A}{\hbar} \right)^2 / \left( k_{\text{ex}} + \frac{1}{T_{1e}} \right). \quad (\text{S13})$$

Following Equations (S4) and (S9), a plot of  $\ln(1/T_{2r})$  vs  $1000/T$  will now have a positive slope at high  $T$ . Hence, a change in the sign of the slope indicates a switchover between the “slow-exchange” and the “fast-exchange” limits.

(2) Raw data and refined parameters

**Table S8.** Raw data from the variable-temperature  $^{17}\text{O}$  NMR measurement of 3.0 mM Gd-OxyMepa complex.

| $T$ ( $^{\circ}\text{C}$ ) | $1000/T$ ( $\text{K}^{-1}$ ) | Sample $T_2$ (s) | Reference $T_{2A}$ (s) | $1/T_{2r}$ ( $10^6 \text{ s}^{-1}$ ) | $\ln(1/T_{2r})$ |
|----------------------------|------------------------------|------------------|------------------------|--------------------------------------|-----------------|
| 6.13                       | 3.580                        | 0.002964         | 0.003920               | 0.846                                | 13.65           |
| 10.86                      | 3.520                        | 0.003032         | 0.004649               | 1.179                                | 13.98           |
| 15.58                      | 3.463                        | 0.002978         | 0.005427               | 1.556                                | 14.26           |
| 20.30                      | 3.407                        | 0.002942         | 0.006221               | 1.842                                | 14.43           |
| 25.03                      | 3.353                        | 0.002834         | 0.007117               | 2.182                                | 14.60           |
| 29.75                      | 3.301                        | 0.002666         | 0.008133               | 2.591                                | 14.77           |
| 34.48                      | 3.250                        | 0.002620         | 0.009119               | 2.795                                | 14.84           |
| 39.20                      | 3.201                        | 0.002545         | 0.009842               | 2.994                                | 14.91           |
| 43.92                      | 3.153                        | 0.002719         | 0.011057               | 2.851                                | 14.86           |
| 48.65                      | 3.107                        | 0.002917         | 0.011858               | 2.657                                | 14.79           |
| 53.37                      | 3.062                        | 0.003245         | 0.012729               | 2.360                                | 14.67           |
| 58.10                      | 3.018                        | 0.003618         | 0.013983               | 2.106                                | 14.56           |
| 62.82                      | 2.976                        | 0.004171         | 0.014785               | 1.769                                | 14.39           |
| 67.55                      | 2.935                        | 0.004872         | 0.016086               | 1.471                                | 14.20           |
| 72.27                      | 2.895                        | 0.005667         | 0.016947               | 1.207                                | 14.00           |
| 76.99                      | 2.856                        | 0.006415         | 0.017234               | 1.006                                | 13.82           |
| 81.72                      | 2.818                        | 0.007160         | 0.019496               | 0.908                                | 13.72           |
| 86.44                      | 2.781                        | 0.007930         | 0.020111               | 0.785                                | 13.57           |

**Table S9.** Parameters obtained by fitting the experimental data at different  $A/\hbar$  values.

| $A/\hbar$ ( $10^6 \text{ rad}\cdot\text{s}^{-1}$ ) | $k_{\text{ex}}^{298}$ ( $10^6 \text{ s}^{-1}$ ) | $\Delta H^{\ddagger}$ ( $\text{kJ}\cdot\text{mol}^{-1}$ ) | $1/T_{1e}^{298}$ ( $10^7 \text{ s}^{-1}$ ) | $\Delta E_{\text{T1e}}$ ( $\text{kJ}\cdot\text{mol}^{-1}$ ) |
|----------------------------------------------------|-------------------------------------------------|-----------------------------------------------------------|--------------------------------------------|-------------------------------------------------------------|
| -2.9                                               | $2.8 \pm 0.1$                                   | $39.1 \pm 0.7$                                            | $0.11 \pm 0.01$                            | $-32.0 \pm 5.5$                                             |
| -3.2                                               | $2.8 \pm 0.1$                                   | $39.6 \pm 1.0$                                            | $0.20 \pm 0.02$                            | $-34.1 \pm 4.6$                                             |
| -3.5                                               | $2.8 \pm 0.1$                                   | $39.7 \pm 1.0$                                            | $0.29 \pm 0.03$                            | $-35.6 \pm 3.7$                                             |
| -3.8                                               | $2.8 \pm 0.1$                                   | $39.8 \pm 1.1$                                            | $0.40 \pm 0.03$                            | $-36.5 \pm 3.0$                                             |
| -4.1                                               | $2.8 \pm 0.1$                                   | $39.9 \pm 1.1$                                            | $0.52 \pm 0.04$                            | $-37.1 \pm 2.6$                                             |

## Reference

- (1) Swift, T. J.; Connick, R. E. NMR-Relaxation Mechanisms of  $O^{17}$  in Aqueous Solutions of Paramagnetic Cations and the Lifetime of Water Molecules in the First Coordination Sphere. *J. Chem. Phys.* **1962**, *37*, 307–320.
- (2) Micskei, K.; Helm, L.; Brücher, E.; Merbach, A. E.  $^{17}O$  NMR Study of Water Exchange on  $[Gd(DTPA)(H_2O)]^{2-}$  and  $[Gd(DOTA)(H_2O)]^-$  Related to NMR Imaging. *Inorg. Chem.* **1993**, *32*, 3844–3850.
- (3) Powell, D. H.; Dhubhghaill, O. M. N.; Pubanz, D.; Helm, L.; Lebedev, Y. S.; Schlaepfer, W.; Merbach, A. E. Structural and Dynamic Parameters Obtained from  $^{17}O$  NMR, EPR, and NMRD Studies of Monomeric and Dimeric  $Gd^{3+}$  Complexes of Interest in Magnetic Resonance Imaging: An Integrated and Theoretically Self-Consistent Approach. *J. Am. Chem. Soc.* **1996**, *118*, 9333–9346.
- (4) Burai, L.; Tóth, É.; Sour, A.; Merbach, A. E. Separation and Characterization of the Two Diastereomers for  $[Gd(DTPA-bz-NH_2)(H_2O)]^{2-}$ , a Common Synthon in Macromolecular MRI Contrast Agents: Their Water Exchange and Isomerization Kinetics. *Inorg. Chem.* **2005**, *44*, 3561–3568.
- (5) Caravan, P.; Parigi, G.; Chasse, J. M.; Cloutier, N. J.; Ellison, J. J.; Lauffer, R. B.; Luchinat, C.; McDermid, S. A.; Spiller, M.; McMurry, T. J. Albumin Binding, Relaxivity, and Water Exchange Kinetics of the Diastereoisomers of MS-325, a Gadolinium(III)-Based Magnetic Resonance Angiography Contrast Agent. *Inorg. Chem.* **2007**, *46*, 6632–6639.
